# Supplementary material for: A MAC2-positive progenitor-like microglial population is resistant to CSF1R inhibition in adult mouse brain
Source: eLife. 2020 Oct 15;9:e51796. doi: 10.7554/eLife.51796 (PMC7591254; doi:10.7554/eLife.51796)
Supplement: Figure 1—source data 1. [file elife-51796-fig1-data1.xlsx]

## Sheet: noD2-3_test_cluster_6
Cell counts in each cluster
cluster	Ctrl-1	Ctrl-2	Ctrl-3	D0-1	D0-2	D0-3	D2-1	D2-2
1	263	120	208	2757	3238	1118	2511	1255
2	2913	2005	2987	48	75	441	42	1
3	733	60	84	535	176	83	570	350
4	230	233	255	211	370	219	135	201
5	5	2	5	208	497	233	335	242
Sum	4144	2420	3539	3759	4356	2094	3593	2049
Ratio
cluster	Ctrl-1	Ctrl-2	Ctrl-3	D0-1	D0-2	D0-3	D2-1	D2-2
1	0.0634653	0.0495868	0.0587737	0.73344	0.743343	0.533906	0.698859	0.612494
2	0.702944	0.828512	0.844024	0.0127694	0.0172176	0.210602	0.0116894	0.000488043
3	0.176882	0.0247934	0.0237355	0.142325	0.040404	0.0396371	0.158642	0.170815
4	0.0555019	0.096281	0.0720543	0.0561319	0.0849403	0.104585	0.0375731	0.0980966
5	0.00120656	0.000826446	0.00141283	0.0553339	0.114096	0.11127	0.0932368	0.118106
