# Supplementary material for: A MAC2-positive progenitor-like microglial population is resistant to CSF1R inhibition in adult mouse brain
Source: eLife. 2020 Oct 15;9:e51796. doi: 10.7554/eLife.51796 (PMC7591254; doi:10.7554/eLife.51796)
Supplement: Figure 2—source data 1. [file elife-51796-fig2-data1.xlsx]

## Sheet: LG180_markers_reclustered
	p_val	avg_logFC	pct.1	pct.2	p_val_adj	cluster	gene
Ccl4	0	0.796042	0.851	0.66	0	1	Ccl4
Ccl3	0	0.786665	0.828	0.574	0	1	Ccl3
Cd83	0	0.65574	0.828	0.564	0	1	Cd83
Ccrl2	0	0.545706	0.67	0.436	0	1	Ccrl2
Bcl2a1b	0	0.535965	0.849	0.618	0	1	Bcl2a1b
Cd63	0	0.525285	0.947	0.752	0	1	Cd63
Arl5c	0	0.524435	0.507	0.229	0	1	Arl5c
Lgals3bp	0	0.424406	0.602	0.348	0	1	Lgals3bp
Ctsb	0	0.396928	0.997	0.938	0	1	Ctsb
Ctsl	0	0.378427	0.995	0.867	0	1	Ctsl
Fth1	0	0.368353	1	0.974	0	1	Fth1
B2m	0	0.352569	0.997	0.94	0	1	B2m
Rps2	0	0.351406	0.987	0.91	0	1	Rps2
Mpeg1	0	0.337696	0.978	0.848	0	1	Mpeg1
Ctsh	0	0.337208	0.987	0.891	0	1	Ctsh
Rpl10a	0	0.327834	0.991	0.926	0	1	Rpl10a
Rpl32	0	0.306354	0.996	0.946	0	1	Rpl32
Rps12	0	0.302186	0.996	0.952	0	1	Rps12
Psap	0	0.298006	0.997	0.942	0	1	Psap
Gm10076	0	0.292008	0.858	0.682	0	1	Gm10076
Rpl12	0	0.291452	0.99	0.918	0	1	Rpl12
H2-D1	0	0.28868	0.975	0.851	0	1	H2-D1
Ctss	0	0.284022	0.999	0.965	0	1	Ctss
Lamp1	0	0.279836	0.993	0.911	0	1	Lamp1
Creg1	0	0.274257	0.953	0.8	0	1	Creg1
Rpl23a	0	0.271676	0.974	0.868	0	1	Rpl23a
Rps25	0	0.268867	0.986	0.905	0	1	Rps25
Rack1	0	0.267697	0.983	0.901	0	1	Rack1
Ctsz	0	0.264685	0.997	0.928	0	1	Ctsz
Rps27a	0	0.262207	0.998	0.953	0	1	Rps27a
Rps5	0	0.26067	0.993	0.933	0	1	Rps5
mt-Nd4l	0	0.260325	0.82	0.62	0	1	mt-Nd4l
Rpsa	0	0.259378	0.993	0.935	0	1	Rpsa
Rpl15	0	0.256981	0.987	0.916	0	1	Rpl15
Ifi27l2a	0	0.25668	0.511	0.255	0	1	Ifi27l2a
Man2b1	0	0.255253	0.976	0.862	0	1	Man2b1
Npm1	0	0.252813	0.932	0.821	0	1	Npm1
Nfkbia	5.09665e-304	0.431146	0.819	0.656	7.80806e-300	1	Nfkbia
Bri3	2.25091e-293	0.256008	0.917	0.791	3.44839e-289	1	Bri3
C3ar1	5.49672e-291	0.258161	0.76	0.549	8.42097e-287	1	C3ar1
Mcl1	1.79732e-277	0.300141	0.919	0.795	2.7535e-273	1	Mcl1
Il1a	3.08813e-270	0.555001	0.612	0.426	4.73101e-266	1	Il1a
Il1b	1.13754e-269	0.431686	0.405	0.206	1.74271e-265	1	Il1b
Cxcl16	1.24313e-267	0.296411	0.598	0.389	1.90448e-263	1	Cxcl16
Zfp36	1.42763e-259	0.28834	0.894	0.743	2.18713e-255	1	Zfp36
Cd14	2.18396e-246	0.338155	0.849	0.689	3.34583e-242	1	Cd14
Ier3	1.58346e-221	0.499324	0.603	0.422	2.42586e-217	1	Ier3
Ccl12	7.15816e-194	0.786754	0.479	0.358	1.09663e-189	1	Ccl12
Socs3	3.18628e-191	0.327178	0.615	0.438	4.88138e-187	1	Socs3
Osm	1.29129e-188	0.271497	0.367	0.204	1.97825e-184	1	Osm
Ier2	6.29871e-184	0.363231	0.529	0.352	9.64962e-180	1	Ier2
Ppp1r15a	1.18237e-179	0.301591	0.546	0.379	1.81139e-175	1	Ppp1r15a
Gadd45b	4.02304e-171	0.452431	0.337	0.191	6.16329e-167	1	Gadd45b
Atf3	9.30306e-166	0.387548	0.634	0.472	1.42523e-161	1	Atf3
Fos	8.68382e-93	0.272695	0.571	0.443	1.33036e-88	1	Fos
Egr1	2.77581e-92	0.315601	0.421	0.301	4.25254e-88	1	Egr1
Tnf	1.1777e-75	0.364594	0.318	0.222	1.80423e-71	1	Tnf
Ccl2	8.01164e-67	0.413446	0.256	0.169	1.22738e-62	1	Ccl2
P2ry12	0	1.15366	1	0.816	0	2	P2ry12
P2ry13	0	1.06692	0.971	0.521	0	2	P2ry13
Tmem119	0	0.940929	0.998	0.699	0	2	Tmem119
Slc2a5	0	0.846733	0.883	0.381	0	2	Slc2a5
Sox4	0	0.845407	0.745	0.334	0	2	Sox4
Ecscr	0	0.810107	0.912	0.454	0	2	Ecscr
Selplg	0	0.801484	0.999	0.892	0	2	Selplg
Crybb1	0	0.761229	0.887	0.507	0	2	Crybb1
Cd164	0	0.7411	0.9	0.519	0	2	Cd164
Fcrls	0	0.718793	0.997	0.835	0	2	Fcrls
Pmepa1	0	0.708849	0.983	0.746	0	2	Pmepa1
Cx3cr1	0	0.683302	1	0.908	0	2	Cx3cr1
Gpr34	0	0.663296	0.999	0.847	0	2	Gpr34
Rhob	0	0.659684	0.992	0.819	0	2	Rhob
Arhgap5	0	0.626093	0.982	0.753	0	2	Arhgap5
Ptgs1	0	0.616622	0.965	0.651	0	2	Ptgs1
Fam102b	0	0.598407	0.848	0.476	0	2	Fam102b
Maf	0	0.596333	0.959	0.679	0	2	Maf
Adrb2	0	0.585696	0.771	0.414	0	2	Adrb2
Lrba	0	0.574403	0.719	0.316	0	2	Lrba
Txnip	0	0.571059	0.941	0.7	0	2	Txnip
Rnase4	0	0.570544	0.968	0.748	0	2	Rnase4
Fscn1	0	0.565415	0.839	0.486	0	2	Fscn1
Cmtm6	0	0.557955	0.96	0.706	0	2	Cmtm6
Dusp6	0	0.55084	0.728	0.352	0	2	Dusp6
Adgrg1	0	0.550052	0.866	0.499	0	2	Adgrg1
Ltc4s	0	0.544954	0.954	0.701	0	2	Ltc4s
Numb	0	0.543408	0.743	0.34	0	2	Numb
Vsir	0	0.518026	0.995	0.846	0	2	Vsir
Pnp	0	0.516378	0.911	0.62	0	2	Pnp
Nav3	0	0.512816	0.746	0.365	0	2	Nav3
Hpgds	0	0.488973	0.982	0.752	0	2	Hpgds
Csmd3	0	0.483394	0.619	0.24	0	2	Csmd3
Zfhx3	0	0.482236	0.96	0.735	0	2	Zfhx3
Slco2b1	0	0.477469	0.92	0.63	0	2	Slco2b1
Serinc3	0	0.474223	0.999	0.907	0	2	Serinc3
F11r	0	0.471553	0.965	0.727	0	2	F11r
Abi3	0	0.466176	0.93	0.673	0	2	Abi3
Bank1	0	0.465769	0.432	0.078	0	2	Bank1
Tgfbr1	0	0.455479	0.991	0.831	0	2	Tgfbr1
Olfml3	0	0.45542	0.998	0.845	0	2	Olfml3
Tmem173	0	0.455044	0.839	0.54	0	2	Tmem173
St3gal5	0	0.453091	0.731	0.403	0	2	St3gal5
Sall1	0	0.449989	0.84	0.529	0	2	Sall1
Plxdc2	0	0.448161	0.975	0.763	0	2	Plxdc2
Camk2n1	0	0.446393	0.644	0.325	0	2	Camk2n1
Khdrbs3	0	0.44114	0.483	0.148	0	2	Khdrbs3
Golm1	0	0.438746	0.959	0.732	0	2	Golm1
Usp2	0	0.436127	0.67	0.352	0	2	Usp2
Lpcat2	0	0.435719	0.993	0.859	0	2	Lpcat2
Dusp7	0	0.435393	0.552	0.216	0	2	Dusp7
Ubc	0	0.432378	0.993	0.906	0	2	Ubc
Sft2d1	0	0.425495	0.847	0.572	0	2	Sft2d1
Rab3il1	0	0.424364	0.805	0.51	0	2	Rab3il1
Tmem86a	0	0.423134	0.863	0.573	0	2	Tmem86a
Nrip1	0	0.419131	0.883	0.621	0	2	Nrip1
Gm47283	0	0.418179	0.663	0.361	0	2	Gm47283
Susd3	0	0.417843	0.867	0.596	0	2	Susd3
Cd53	0	0.417652	0.974	0.811	0	2	Cd53
Siglech	0	0.416811	0.994	0.837	0	2	Siglech
Mafb	0	0.416388	0.982	0.82	0	2	Mafb
Rtn4rl1	0	0.416305	0.633	0.317	0	2	Rtn4rl1
Basp1	0	0.415717	0.995	0.848	0	2	Basp1
Cd37	0	0.413345	0.942	0.723	0	2	Cd37
Pla2g15	0	0.412245	0.835	0.539	0	2	Pla2g15
Gna15	0	0.412162	0.812	0.508	0	2	Gna15
Cebpd	0	0.411684	0.637	0.336	0	2	Cebpd
St3gal6	0	0.410354	0.9	0.634	0	2	St3gal6
Apbb1ip	0	0.406621	0.961	0.761	0	2	Apbb1ip
Cyth4	0	0.402286	0.984	0.823	0	2	Cyth4
Cst3	0	0.397766	1	0.996	0	2	Cst3
Cxxc5	0	0.396629	0.742	0.448	0	2	Cxxc5
Srgap2	0	0.394639	0.96	0.739	0	2	Srgap2
Abhd12	0	0.394514	0.978	0.81	0	2	Abhd12
Csnk1e	0	0.394287	0.852	0.598	0	2	Csnk1e
Elmo1	0	0.394111	0.882	0.606	0	2	Elmo1
Hexb	0	0.391175	1	0.971	0	2	Hexb
Upk1b	0	0.391168	0.462	0.201	0	2	Upk1b
Csf1r	0	0.386081	0.999	0.938	0	2	Csf1r
Lpcat3	0	0.38429	0.658	0.374	0	2	Lpcat3
Pag1	0	0.381604	0.909	0.648	0	2	Pag1
Foxn3	0	0.37931	0.823	0.556	0	2	Foxn3
Ubash3b	0	0.378475	0.614	0.334	0	2	Ubash3b
Slc7a8	0	0.377736	0.727	0.441	0	2	Slc7a8
Sirpa	0	0.37731	0.986	0.839	0	2	Sirpa
Saraf	0	0.3745	0.923	0.711	0	2	Saraf
Gpr183	0	0.372299	0.831	0.589	0	2	Gpr183
Tmem100	0	0.37222	0.457	0.169	0	2	Tmem100
Sall3	0	0.371528	0.474	0.206	0	2	Sall3
Rgs2	0	0.370725	0.927	0.723	0	2	Rgs2
Il6st	0	0.3707	0.611	0.314	0	2	Il6st
Ier5	0	0.370586	0.953	0.81	0	2	Ier5
Commd8	0	0.369513	0.855	0.609	0	2	Commd8
Snn	0	0.368678	0.511	0.208	0	2	Snn
Fez2	0	0.367105	0.752	0.455	0	2	Fez2
Gcnt1	0	0.366472	0.607	0.312	0	2	Gcnt1
Mertk	0	0.363715	0.893	0.619	0	2	Mertk
Rnf13	0	0.36241	0.894	0.666	0	2	Rnf13
Rapgef5	0	0.360443	0.746	0.438	0	2	Rapgef5
Rasgrp3	0	0.35744	0.707	0.423	0	2	Rasgrp3
Tgfb1	0	0.356622	0.913	0.722	0	2	Tgfb1
Rhoh	0	0.356327	0.861	0.599	0	2	Rhoh
Fchsd2	0	0.355926	0.777	0.489	0	2	Fchsd2
Mylip	0	0.354263	0.808	0.543	0	2	Mylip
Grap	0	0.353139	0.543	0.259	0	2	Grap
Slc1a3	0	0.352574	0.654	0.345	0	2	Slc1a3
Nav2	0	0.350674	0.878	0.572	0	2	Nav2
Tpst2	0	0.348913	0.793	0.539	0	2	Tpst2
Mgll	0	0.347813	0.509	0.216	0	2	Mgll
Cd302	0	0.346306	0.718	0.446	0	2	Cd302
Mtdh	0	0.345956	0.989	0.858	0	2	Mtdh
Bin2	0	0.3459	0.901	0.674	0	2	Bin2
Lair1	0	0.345366	0.975	0.779	0	2	Lair1
Calm2	0	0.341705	0.984	0.847	0	2	Calm2
Qk	0	0.337814	0.994	0.88	0	2	Qk
Unc93b1	0	0.337574	0.993	0.879	0	2	Unc93b1
Malat1	0	0.336697	1	0.968	0	2	Malat1
1700017B05Rik	0	0.336289	0.719	0.445	0	2	1700017B05Rik
Mef2c	0	0.336173	0.993	0.858	0	2	Mef2c
Ccnd1	0	0.335848	0.586	0.246	0	2	Ccnd1
Serpine2	0	0.334205	0.927	0.673	0	2	Serpine2
Marcks	0	0.334113	0.999	0.918	0	2	Marcks
Scamp2	0	0.332157	0.963	0.79	0	2	Scamp2
Rtn1	0	0.329178	0.489	0.234	0	2	Rtn1
Sipa1	0	0.32774	0.709	0.446	0	2	Sipa1
C1qa	0	0.326968	1	0.944	0	2	C1qa
Smad7	0	0.326892	0.861	0.635	0	2	Smad7
Lgmn	0	0.326705	0.999	0.921	0	2	Lgmn
Gtf2h2	0	0.325404	0.692	0.427	0	2	Gtf2h2
Retreg1	0	0.324666	0.83	0.587	0	2	Retreg1
Tmed7	0	0.324438	0.72	0.472	0	2	Tmed7
Tcn2	0	0.320693	0.856	0.636	0	2	Tcn2
Ppcdc	0	0.319831	0.698	0.427	0	2	Ppcdc
Atp2c1	0	0.319494	0.778	0.552	0	2	Atp2c1
Nptn	0	0.318954	0.833	0.595	0	2	Nptn
Lyl1	0	0.318725	0.612	0.351	0	2	Lyl1
Scoc	0	0.316996	0.939	0.748	0	2	Scoc
Pde3b	0	0.316972	0.856	0.607	0	2	Pde3b
Irf2bpl	0	0.316679	0.515	0.27	0	2	Irf2bpl
Whrn	0	0.315643	0.503	0.206	0	2	Whrn
Hhex	0	0.315389	0.632	0.381	0	2	Hhex
Tanc2	0	0.315156	0.92	0.67	0	2	Tanc2
Ptp4a3	0	0.313947	0.656	0.403	0	2	Ptp4a3
Slc16a6	0	0.313857	0.751	0.49	0	2	Slc16a6
BC037034	0	0.312659	0.567	0.3	0	2	BC037034
Cyfip1	0	0.310039	0.971	0.821	0	2	Cyfip1
Ogfrl1	0	0.308788	0.715	0.482	0	2	Ogfrl1
Cttnbp2nl	0	0.308721	0.883	0.65	0	2	Cttnbp2nl
Itgam	0	0.308327	0.94	0.749	0	2	Itgam
3222401L13Rik	0	0.308215	0.418	0.149	0	2	3222401L13Rik
Zdhhc20	0	0.306713	0.584	0.337	0	2	Zdhhc20
Rsrp1	0	0.305927	0.959	0.799	0	2	Rsrp1
Ski	0	0.305623	0.77	0.532	0	2	Ski
Frmd4a	0	0.305293	0.935	0.695	0	2	Frmd4a
Klf3	0	0.30477	0.732	0.498	0	2	Klf3
Inpp4b	0	0.30453	0.495	0.234	0	2	Inpp4b
Ivns1abp	0	0.303404	0.93	0.716	0	2	Ivns1abp
Ckb	0	0.303181	0.98	0.835	0	2	Ckb
Arhgef40	0	0.301671	0.501	0.242	0	2	Arhgef40
Ldhb	0	0.301618	0.95	0.767	0	2	Ldhb
Stab1	0	0.298326	0.752	0.439	0	2	Stab1
Jmjd1c	0	0.297777	0.86	0.634	0	2	Jmjd1c
Zfp710	0	0.29754	0.617	0.371	0	2	Zfp710
Ints6l	0	0.296046	0.608	0.331	0	2	Ints6l
Wasf2	0	0.295697	0.893	0.716	0	2	Wasf2
Snx18	0	0.29522	0.838	0.607	0	2	Snx18
Trem2	0	0.295201	1	0.902	0	2	Trem2
Tjp1	0	0.295177	0.609	0.362	0	2	Tjp1
Prkab1	0	0.292966	0.403	0.165	0	2	Prkab1
Lmo2	0	0.29188	0.85	0.631	0	2	Lmo2
Cirbp	0	0.29181	0.468	0.23	0	2	Cirbp
Rin2	0	0.291029	0.699	0.438	0	2	Rin2
Abcc3	0	0.28904	0.463	0.217	0	2	Abcc3
Etv5	0	0.288749	0.339	0.115	0	2	Etv5
Slc44a2	0	0.288207	0.536	0.279	0	2	Slc44a2
Mbnl1	0	0.288127	0.956	0.786	0	2	Mbnl1
Fmnl3	0	0.286894	0.555	0.298	0	2	Fmnl3
Orai1	0	0.284955	0.83	0.608	0	2	Orai1
Pwwp2a	0	0.284102	0.693	0.442	0	2	Pwwp2a
Mef2a	0	0.284027	0.98	0.835	0	2	Mef2a
Mcfd2	0	0.283751	0.629	0.382	0	2	Mcfd2
Comt	0	0.283623	0.922	0.736	0	2	Comt
Serinc1	0	0.283566	0.857	0.635	0	2	Serinc1
Laptm4a	0	0.283133	0.942	0.774	0	2	Laptm4a
Camk1	0	0.278968	0.943	0.753	0	2	Camk1
Msrb2	0	0.278543	0.447	0.21	0	2	Msrb2
Inpp5d	0	0.277385	0.916	0.718	0	2	Inpp5d
Pik3cg	0	0.275989	0.542	0.295	0	2	Pik3cg
Klhdc8b	0	0.275097	0.329	0.104	0	2	Klhdc8b
Dock4	0	0.273604	0.846	0.602	0	2	Dock4
Cables1	0	0.271156	0.432	0.202	0	2	Cables1
Frmd4b	0	0.270019	0.828	0.565	0	2	Frmd4b
Taz	0	0.269575	0.586	0.329	0	2	Taz
Myo1b	0	0.268699	0.367	0.142	0	2	Myo1b
Bin1	0	0.268494	0.988	0.848	0	2	Bin1
Iffo1	0	0.268039	0.522	0.278	0	2	Iffo1
Glul	0	0.267302	0.945	0.781	0	2	Glul
Arhgap45	0	0.266948	0.91	0.692	0	2	Arhgap45
Prkca	0	0.265664	0.411	0.181	0	2	Prkca
Tmcc3	0	0.262971	0.785	0.549	0	2	Tmcc3
Kif21b	0	0.262103	0.601	0.35	0	2	Kif21b
Ifngr1	0	0.259045	0.991	0.877	0	2	Ifngr1
Cmtm7	0	0.257806	0.901	0.704	0	2	Cmtm7
Tmem59	0	0.2569	0.969	0.822	0	2	Tmem59
Tmbim6	0	0.256328	0.982	0.863	0	2	Tmbim6
Rabac1	0	0.254348	0.894	0.721	0	2	Rabac1
Itm2c	0	0.25255	0.959	0.813	0	2	Itm2c
Jund	4.94065645841247e-324	0.482224	0.933	0.793	7.5690856942879e-320	2	Jund
Maml3	4.94065645841247e-324	0.263698	0.508	0.266	7.5690856942879e-320	2	Maml3
Evl	2.39621838233005e-321	0.28808	0.69	0.459	3.67100656172963e-317	2	Evl
Snx17	3.82900875526966e-321	0.287844	0.73	0.502	5.86604141307312e-317	2	Snx17
Klf7	5.79539002571782e-321	0.29982	0.451	0.222	8.8785375193997e-317	2	Klf7
Il21r	2.23317671920243e-320	0.274292	0.689	0.449	3.42122673381813e-316	2	Il21r
Selenos	3.05184349436138e-319	0.26678	0.808	0.59	4.67542423336163e-315	2	Selenos
Sgk1	1.30188273941752e-318	0.29774	0.823	0.594	1.99448435678764e-314	2	Sgk1
Fam212a	9.39593245097193e-316	0.285601	0.499	0.262	1.4394568514889e-311	2	Fam212a
Gpr155	2.10559989840097e-315	0.2733	0.536	0.295	3.22577904435028e-311	2	Gpr155
Phgdh	4.79178958312995e-315	0.274074	0.602	0.354	7.34102164135508e-311	2	Phgdh
Cd180	2.04334679897095e-314	0.283657	0.684	0.442	3.13040729602349e-310	2	Cd180
Lims1	8.61558851696843e-312	0.274236	0.752	0.531	1.31991e-307	2	Lims1
Rgmb	5.11993348912272e-311	0.258407	0.455	0.225	7.84374e-307	2	Rgmb
Ikzf1	5.9394975314758e-310	0.258077	0.75	0.527	9.09931e-306	2	Ikzf1
Siglece	0	0.250761	0.375	0.162	8.12653e-305	2	Siglece
P4ha1	3.51536e-308	0.280908	0.792	0.579	5.38554e-304	2	P4ha1
Fam110a	4.71324e-308	0.264869	0.362	0.154	7.22069e-304	2	Fam110a
Zmiz1	1.99524e-304	0.260861	0.749	0.529	3.05671e-300	2	Zmiz1
Tgfbr2	1.76608e-301	0.254349	0.785	0.569	2.70564e-297	2	Tgfbr2
Pura	1.69999e-296	0.262577	0.751	0.536	2.60438e-292	2	Pura
Plod1	7.92256e-296	0.272462	0.576	0.344	1.21374e-291	2	Plod1
Cdk5r1	7.65399e-294	0.257668	0.349	0.147	1.17259e-289	2	Cdk5r1
Arl1	1.54873e-291	0.271463	0.707	0.494	2.37265e-287	2	Arl1
Mid1ip1	8.08731e-291	0.307214	0.635	0.405	1.23898e-286	2	Mid1ip1
Tspan14	3.09942e-289	0.260532	0.682	0.455	4.74831e-285	2	Tspan14
Pdgfb	3.81565e-287	0.270362	0.722	0.492	5.84557e-283	2	Pdgfb
Pald1	8.60555e-287	0.253591	0.471	0.25	1.31837e-282	2	Pald1
Abl1	6.66539e-285	0.253157	0.485	0.263	1.02114e-280	2	Abl1
Ang	3.27072e-284	0.258946	0.747	0.526	5.01074e-280	2	Ang
Clec5a	4.17367e-284	0.252555	0.591	0.359	6.39406e-280	2	Clec5a
Syngr2	2.43755e-283	0.256835	0.816	0.616	3.73432e-279	2	Syngr2
Ptpre	5.03824e-283	0.257431	0.721	0.499	7.71858e-279	2	Ptpre
Mfng	2.07639e-282	0.256993	0.572	0.343	3.18104e-278	2	Mfng
Fli1	1.05565e-281	0.262299	0.658	0.432	1.61725e-277	2	Fli1
Lpar6	3.51414e-279	0.295024	0.623	0.393	5.38366e-275	2	Lpar6
Mfap3	4.1065e-279	0.264522	0.495	0.275	6.29116e-275	2	Mfap3
Idh2	1.12907e-278	0.26593	0.595	0.37	1.72974e-274	2	Idh2
Slc7a7	5.34297e-278	0.275772	0.552	0.335	8.18542e-274	2	Slc7a7
Plcl2	1.10839e-275	0.252526	0.552	0.326	1.69805e-271	2	Plcl2
Klk8	1.59793e-275	0.256251	0.711	0.487	2.44803e-271	2	Klk8
Rps6ka1	1.84377e-266	0.253185	0.707	0.496	2.82466e-262	2	Rps6ka1
Tm9sf2	4.97435e-264	0.253337	0.681	0.468	7.6207e-260	2	Tm9sf2
Edem2	8.24717e-262	0.250547	0.713	0.505	1.26347e-257	2	Edem2
Jun	1.33063e-250	0.449091	0.929	0.807	2.03853e-246	2	Jun
Reep3	2.03345e-232	0.251736	0.679	0.485	3.11525e-228	2	Reep3
Hk2	2.55353e-231	0.271111	0.73	0.534	3.912e-227	2	Hk2
Tmx4	1.09519e-198	0.315951	0.545	0.359	1.67784e-194	2	Tmx4
Hsp90aa1	1.36189e-175	0.346751	0.837	0.69	2.08641e-171	2	Hsp90aa1
Hspa1b	2.05792e-84	0.397038	0.459	0.347	3.15273e-80	2	Hspa1b
Hspa1a	8.44048e-66	0.320577	0.545	0.432	1.29308e-61	2	Hspa1a
Gm42418	0	1.89739	0.987	0.991	0	3	Gm42418
Gm26917	0	1.66548	0.169	0.408	0	3	Gm26917
AY036118	0	0.905965	0.325	0.454	0	3	AY036118
Lars2	0	0.714806	0.174	0.271	0	3	Lars2
Xist	0	0.651982	0.417	0.951	0	3	Xist
Dst	0	0.492086	0.294	0.674	0	3	Dst
Kcnq1ot1	0	0.459124	0.12	0.372	0	3	Kcnq1ot1
Macf1	0	0.451696	0.45	0.864	0	3	Macf1
mt-Co3	0	0.36162	0.892	0.993	0	3	mt-Co3
Rbm25	0	0.357933	0.287	0.793	0	3	Rbm25
Chd9	0	0.346529	0.229	0.638	0	3	Chd9
Ddx17	0	0.341576	0.204	0.564	0	3	Ddx17
mt-Nd4	0	0.336735	0.805	0.985	0	3	mt-Nd4
Plek	0	0.333145	0.369	0.794	0	3	Plek
Stard9	0	0.329946	0.132	0.432	0	3	Stard9
Malat11	0	0.325233	0.851	0.992	0	3	Malat1
Mycbp2	0	0.311684	0.305	0.795	0	3	Mycbp2
Huwe1	0	0.305913	0.132	0.411	0	3	Huwe1
mt-Nd4l1	0	0.30506	0.413	0.741	0	3	mt-Nd4l
mt-Nd2	0	0.303466	0.767	0.977	0	3	mt-Nd2
Snx29	0	0.300992	0.127	0.432	0	3	Snx29
mt-Nd1	0	0.30018	0.737	0.972	0	3	mt-Nd1
Skil	0	0.293456	0.296	0.781	0	3	Skil
Fus	0	0.29193	0.319	0.847	0	3	Fus
mt-Cytb	0	0.289963	0.826	0.987	0	3	mt-Cytb
mt-Atp6	0	0.287386	0.871	0.994	0	3	mt-Atp6
Pabpc1	0	0.28446	0.594	0.916	0	3	Pabpc1
Zeb2	0	0.283634	0.413	0.922	0	3	Zeb2
Rps26	0	0.282993	0.609	0.961	0	3	Rps26
Hnrnpa2b1	0	0.282807	0.523	0.906	0	3	Hnrnpa2b1
Safb2	0	0.282752	0.149	0.534	0	3	Safb2
Cntrl	0	0.277579	0.105	0.35	0	3	Cntrl
Usp34	0	0.27722	0.136	0.429	0	3	Usp34
Atrx	0	0.277146	0.245	0.677	0	3	Atrx
Map4	0	0.276714	0.165	0.469	0	3	Map4
Git2	0	0.276658	0.241	0.749	0	3	Git2
Frmd4a1	0	0.27474	0.317	0.824	0	3	Frmd4a
Ccnl1	0	0.269105	0.209	0.723	0	3	Ccnl1
Lcorl	0	0.267589	0.085	0.292	0	3	Lcorl
Rps8	0	0.266413	0.757	0.993	0	3	Rps8
Elmo11	0	0.266271	0.277	0.743	0	3	Elmo1
Kif13b	0	0.265103	0.088	0.275	0	3	Kif13b
Luc7l2	0	0.264667	0.289	0.832	0	3	Luc7l2
Nav21	0	0.263032	0.217	0.723	0	3	Nav2
Sfpq	0	0.261712	0.286	0.744	0	3	Sfpq
Pds5a	0	0.259659	0.104	0.377	0	3	Pds5a
Hnrnph1	0	0.259384	0.177	0.563	0	3	Hnrnph1
Rpl6	0	0.256076	0.746	0.991	0	3	Rpl6
Snrnp70	0	0.254244	0.291	0.833	0	3	Snrnp70
Phip	0	0.253742	0.149	0.537	0	3	Phip
Fchsd21	0	0.252589	0.196	0.626	0	3	Fchsd2
Ddx46	0	0.251762	0.137	0.396	0	3	Ddx46
Dhx9	0	0.251452	0.154	0.447	0	3	Dhx9
Luc7l3	0	0.251239	0.158	0.509	0	3	Luc7l3
Cd74	0	4.15785	0.69	0.325	0	4	Cd74
H2-Aa	0	3.84036	0.521	0.036	0	4	H2-Aa
H2-Eb1	0	3.78393	0.506	0.032	0	4	H2-Eb1
H2-Ab1	0	3.62096	0.536	0.134	0	4	H2-Ab1
Lyz2	0	2.61516	0.893	0.848	0	4	Lyz2
Ifitm3	0	2.43478	0.795	0.233	0	4	Ifitm3
S100a6	0	2.40662	0.614	0.032	0	4	S100a6
Crip1	0	2.31735	0.697	0.116	0	4	Crip1
Ifitm2	0	2.16394	0.727	0.051	0	4	Ifitm2
Vim	0	2.13836	0.66	0.127	0	4	Vim
Plac8	0	2.12366	0.325	0.021	0	4	Plac8
Apoe	0	2.07978	0.674	0.593	0	4	Apoe
Lgals3	0	2.03473	0.603	0.053	0	4	Lgals3
Wfdc17	0	2.02157	0.66	0.037	0	4	Wfdc17
Cybb	0	1.8563	0.724	0.077	0	4	Cybb
Tmsb10	0	1.82332	0.789	0.508	0	4	Tmsb10
S100a4	0	1.78829	0.56	0.044	0	4	S100a4
Napsa	0	1.74596	0.573	0.002	0	4	Napsa
Fxyd5	0	1.7448	0.75	0.243	0	4	Fxyd5
Cd209a	0	1.6993	0.324	0.002	0	4	Cd209a
Ahnak	0	1.6681	0.595	0.003	0	4	Ahnak
Mgl2	0	1.65502	0.353	0.003	0	4	Mgl2
Pim1	0	1.64583	0.629	0.146	0	4	Pim1
Ms4a6c	0	1.64386	0.775	0.274	0	4	Ms4a6c
S100a11	0	1.63497	0.618	0.049	0	4	S100a11
S100a10	0	1.56264	0.557	0.114	0	4	S100a10
Ccr2	0	1.54382	0.512	0.021	0	4	Ccr2
Anxa2	0	1.49776	0.58	0.044	0	4	Anxa2
Lsp1	0	1.49256	0.729	0.436	0	4	Lsp1
Iqgap1	0	1.4901	0.735	0.113	0	4	Iqgap1
Lgals1	0	1.45788	0.601	0.066	0	4	Lgals1
Mrc1	0	1.40718	0.386	0.035	0	4	Mrc1
Plbd1	0	1.37499	0.561	0.008	0	4	Plbd1
Cytip	0	1.28993	0.552	0.037	0	4	Cytip
Msrb1	0	1.2671	0.476	0.161	0	4	Msrb1
Ms4a7	0	1.24783	0.289	0.005	0	4	Ms4a7
F13a1	0	1.21906	0.331	0.002	0	4	F13a1
Ms4a4c	0	1.1654	0.433	0.043	0	4	Ms4a4c
Itga4	0	1.15821	0.559	0.033	0	4	Itga4
Tnip3	0	1.13796	0.277	0.004	0	4	Tnip3
Emb	0	1.1312	0.491	0.005	0	4	Emb
Ifitm6	0	1.09767	0.345	0.007	0	4	Ifitm6
Smpdl3a	0	1.089	0.554	0.188	0	4	Smpdl3a
Cd52	0	1.08401	0.911	0.795	0	4	Cd52
Emp3	0	1.07669	0.77	0.329	0	4	Emp3
Srgn	0	1.07461	0.867	0.739	0	4	Srgn
Dab2	0	1.06544	0.389	0.081	0	4	Dab2
Stap1	0	1.05566	0.487	0.002	0	4	Stap1
Clec12a	0	1.04393	0.545	0.002	0	4	Clec12a
Adgre5	0	1.04324	0.424	0.008	0	4	Adgre5
Anxa1	0	1.02263	0.417	0.005	0	4	Anxa1
Ifi203	0	1.01092	0.456	0.001	0	4	Ifi203
Traf1	0	0.997042	0.361	0.009	0	4	Traf1
Itgal	0	0.97803	0.298	0.007	0	4	Itgal
Mndal	0	0.976263	0.5	0.002	0	4	Mndal
Tgfbi	0	0.96854	0.549	0.135	0	4	Tgfbi
Clec10a	0	0.96534	0.316	0.002	0	4	Clec10a
Tagln2	0	0.961874	0.624	0.343	0	4	Tagln2
Gpx1	0	0.957158	0.866	0.777	0	4	Gpx1
Samhd1	0	0.939969	0.696	0.358	0	4	Samhd1
Actg1	0	0.93974	0.963	0.919	0	4	Actg1
Mcemp1	0	0.928754	0.406	0.011	0	4	Mcemp1
H2-DMb1	0	0.919462	0.614	0.554	0	4	H2-DMb1
Anxa5	0	0.917884	0.711	0.316	0	4	Anxa5
Slfn2	0	0.912952	0.657	0.288	0	4	Slfn2
Klrd1	0	0.908574	0.269	0.035	0	4	Klrd1
Slamf7	0	0.891724	0.379	0.008	0	4	Slamf7
H2-D11	0	0.879162	0.965	0.902	0	4	H2-D1
H3f3a	0	0.876091	0.964	0.915	0	4	H3f3a
Cxcr4	0	0.858933	0.372	0.041	0	4	Cxcr4
Clec4a1	0	0.848924	0.436	0.025	0	4	Clec4a1
Cd44	0	0.838148	0.43	0.047	0	4	Cd44
Itgb7	0	0.835732	0.413	0.003	0	4	Itgb7
Sh3bgrl	0	0.831845	0.562	0.085	0	4	Sh3bgrl
Calm1	0	0.826751	0.919	0.796	0	4	Calm1
Stk17b	0	0.823261	0.621	0.218	0	4	Stk17b
Gsr	0	0.816926	0.332	0.121	0	4	Gsr
Bhlhe40	0	0.787973	0.296	0.024	0	4	Bhlhe40
Aldh2	0	0.787651	0.662	0.331	0	4	Aldh2
Metrnl	0	0.784117	0.42	0.056	0	4	Metrnl
Flna	0	0.78063	0.498	0.156	0	4	Flna
Trps1	0	0.761679	0.49	0.04	0	4	Trps1
Pla2g7	0	0.753256	0.289	0.02	0	4	Pla2g7
H2-K1	0	0.750608	0.929	0.867	0	4	H2-K1
Pltp	0	0.749616	0.269	0.016	0	4	Pltp
Clec4b1	0	0.747421	0.29	0.001	0	4	Clec4b1
Cnn2	0	0.745212	0.537	0.145	0	4	Cnn2
Actr3	0	0.722219	0.875	0.722	0	4	Actr3
Gsn	0	0.691908	0.444	0.045	0	4	Gsn
Ifi207	0	0.691902	0.405	0.037	0	4	Ifi207
Mrpl33	0	0.688598	0.649	0.359	0	4	Mrpl33
Fgr	0	0.684781	0.338	0.025	0	4	Fgr
Coro1a	0	0.683485	0.888	0.855	0	4	Coro1a
Rnase6	0	0.683304	0.483	0.133	0	4	Rnase6
Arhgap15	0	0.680738	0.509	0.069	0	4	Arhgap15
Sem1	0	0.668205	0.848	0.675	0	4	Sem1
Zyx	0	0.663728	0.593	0.249	0	4	Zyx
Olfm1	0	0.656793	0.333	0.006	0	4	Olfm1
Emilin2	0	0.656553	0.331	0.008	0	4	Emilin2
AB124611	0	0.652905	0.449	0.04	0	4	AB124611
Lilrb4a	0	0.651569	0.378	0.042	0	4	Lilrb4a
Lilr4b	0	0.649547	0.341	0.018	0	4	Lilr4b
Myl6	0	0.64137	0.927	0.83	0	4	Myl6
Cfp	0	0.635222	0.337	0.011	0	4	Cfp
Gpr132	0	0.633578	0.349	0.006	0	4	Gpr132
Sh3bgrl3	0	0.632352	0.963	0.906	0	4	Sh3bgrl3
Gpr141	0	0.622428	0.311	0	0	4	Gpr141
Ltb4r1	0	0.5927	0.298	0.004	0	4	Ltb4r1
Ezr	0	0.587023	0.353	0.039	0	4	Ezr
Unc119	0	0.582477	0.341	0.006	0	4	Unc119
Runx3	0	0.579758	0.332	0.004	0	4	Runx3
Mcub	0	0.573903	0.417	0.054	0	4	Mcub
Klra2	0	0.539633	0.271	0.001	0	4	Klra2
Rpl38	0	0.535303	0.964	0.922	0	4	Rpl38
Alcam	0	0.528657	0.316	0.006	0	4	Alcam
Gm6377	0	0.525165	0.278	0.008	0	4	Gm6377
Ptger4	0	0.516098	0.279	0.023	0	4	Ptger4
Samd9l	0	0.510928	0.35	0.026	0	4	Samd9l
Pfkp	0	0.508001	0.306	0.007	0	4	Pfkp
Ciita	0	0.49759	0.291	0.001	0	4	Ciita
Iqgap2	0	0.492255	0.323	0.004	0	4	Iqgap2
4930523C07Rik	0	0.484468	0.306	0.02	0	4	4930523C07Rik
Agpat4	0	0.484431	0.327	0.041	0	4	Agpat4
Rara	0	0.474055	0.266	0	0	4	Rara
Pstpip1	0	0.46792	0.368	0.027	0	4	Pstpip1
Sema4a	0	0.452913	0.347	0.033	0	4	Sema4a
2020-09-09	0	0.443528	0.312	0.033	0	4	2020-09-09
Vav3	0	0.441138	0.276	0.001	0	4	Vav3
Plec	0	0.4105	0.271	0.022	0	4	Plec
Eps8	6.51906032882264e-317	0.458548	0.305	0.034	9.98720042375629e-313	4	Eps8
H2-DMa	2.58327331566874e-316	0.611263	0.683	0.69	3.95757471960451e-312	4	H2-DMa
Pitpna	3.88280112972247e-314	0.618158	0.772	0.562	5.94845133073483e-310	4	Pitpna
Prdx6	0	0.755809	0.564	0.261	2.79101e-305	4	Prdx6
Rps27	4.41379e-308	0.496561	0.972	0.948	6.76192e-304	4	Rps27
Plin2	2.93545e-305	0.821201	0.518	0.193	4.49711e-301	4	Plin2
Fosl2	2.05807e-303	0.643957	0.39	0.094	3.15297e-299	4	Fosl2
Sub1	7.78916e-301	0.605187	0.808	0.673	1.1933e-296	4	Sub1
Il2rg	1.21972e-300	0.530564	0.347	0.06	1.86861e-296	4	Il2rg
Cyp4f18	5.55387e-299	0.592089	0.285	0.039	8.50852e-295	4	Cyp4f18
Cd47	1.65669e-297	0.586107	0.834	0.678	2.53805e-293	4	Cd47
Gm2a	4.25611e-294	0.641498	0.72	0.61	6.52036e-290	4	Gm2a
St8sia4	3.4228e-291	0.572138	0.448	0.105	5.24373e-287	4	St8sia4
Alox5ap	1.68692e-290	0.554058	0.813	0.777	2.58437e-286	4	Alox5ap
Rpl18	1.3304e-288	0.500979	0.974	0.956	2.03818e-284	4	Rpl18
H2afj	1.48164e-288	0.639364	0.716	0.415	2.26988e-284	4	H2afj
AW112010	1.42437e-287	1.45777	0.392	0.199	2.18214e-283	4	AW112010
Myo1g	2.67443e-284	0.659143	0.442	0.141	4.09723e-280	4	Myo1g
Rac2	3.593e-284	0.706477	0.784	0.604	5.50448e-280	4	Rac2
Arpc1b	7.36363e-282	0.488861	0.924	0.893	1.12811e-277	4	Arpc1b
Ptprc	2.87212e-281	0.641912	0.876	0.822	4.40009e-277	4	Ptprc
Sp100	1.44429e-273	0.621217	0.487	0.147	2.21265e-269	4	Sp100
Slfn5	1.46902e-272	0.609956	0.341	0.055	2.25053e-268	4	Slfn5
Cd244	4.87613e-267	0.508444	0.275	0.036	7.47023e-263	4	Cd244
Nr4a1	1.80239e-265	0.982932	0.593	0.321	2.76126e-261	4	Nr4a1
Tpt1	8.41205e-264	0.409163	0.99	0.977	1.28873e-259	4	Tpt1
Diaph1	2.77782e-262	0.558283	0.524	0.188	4.25562e-258	4	Diaph1
Hip1	7.58952e-262	0.424823	0.257	0.028	1.16272e-257	4	Hip1
Rpsa1	3.05021e-260	0.550221	0.983	0.959	4.67292e-256	4	Rpsa
Psmb8	2.27131e-257	0.510893	0.86	0.751	3.47964e-253	4	Psmb8
Plaur	1.62636e-253	0.72116	0.341	0.118	2.49159e-249	4	Plaur
Arpc2	9.62731e-252	0.450668	0.928	0.876	1.4749e-247	4	Arpc2
Rps11	5.69777e-249	0.456837	0.988	0.968	8.72899e-245	4	Rps11
Arpc5	1.26081e-248	0.533799	0.836	0.665	1.93156e-244	4	Arpc5
Neat1	1.0259e-247	0.765267	0.73	0.399	1.57167e-243	4	Neat1
Ldlr	1.51059e-246	0.397427	0.259	0.032	2.31423e-242	4	Ldlr
Rpl8	1.70564e-246	0.433483	0.972	0.953	2.61304e-242	4	Rpl8
Rps16	1.89464e-244	0.443046	0.983	0.968	2.9026e-240	4	Rps16
Selenow	1.14789e-241	0.60989	0.66	0.352	1.75857e-237	4	Selenow
H2afy	8.83453e-240	0.544467	0.742	0.614	1.35345e-235	4	H2afy
Eif1	2.61172e-239	0.394114	0.963	0.94	4.00115e-235	4	Eif1
Pirb	1.82708e-237	0.596053	0.503	0.179	2.79909e-233	4	Pirb
Psma7	2.03144e-235	0.532523	0.794	0.634	3.11217e-231	4	Psma7
Rbms1	2.92729e-234	0.503084	0.505	0.181	4.48462e-230	4	Rbms1
Arpc3	2.27952e-229	0.423668	0.904	0.851	3.49223e-225	4	Arpc3
Arhgdib	9.55494e-229	0.571205	0.886	0.813	1.46382e-224	4	Arhgdib
Lst1	2.45111e-228	0.705617	0.667	0.617	3.7551e-224	4	Lst1
Clec2d	1.13861e-226	0.61523	0.576	0.248	1.74435e-222	4	Clec2d
Rps13	2.67882e-222	0.406109	0.978	0.959	4.10395e-218	4	Rps13
St3gal4	4.70164e-222	0.392085	0.341	0.075	7.20292e-218	4	St3gal4
Ehd1	1.22229e-220	0.479721	0.278	0.053	1.87255e-216	4	Ehd1
Rpl34	2.77899e-219	0.38427	0.974	0.958	4.25741e-215	4	Rpl34
Zbp1	1.25828e-218	0.427777	0.262	0.039	1.92769e-214	4	Zbp1
Ccnd3	1.84123e-216	0.573304	0.502	0.223	2.82076e-212	4	Ccnd3
Ms4a6b	1.307e-215	0.606243	0.626	0.451	2.00232e-211	4	Ms4a6b
Fgl2	2.61572e-215	0.659527	0.375	0.112	4.00728e-211	4	Fgl2
Rps51	8.77875e-215	0.455255	0.979	0.958	1.3449e-210	4	Rps5
Ifi209	1.1407e-211	0.529781	0.346	0.08	1.74756e-207	4	Ifi209
Tspo	2.147e-210	0.608762	0.777	0.584	3.2892e-206	4	Tspo
Rpl9	9.3585e-210	0.390991	0.981	0.963	1.43372e-205	4	Rpl9
Rps14	2.16591e-208	0.383247	0.983	0.965	3.31818e-204	4	Rps14
Pmaip1	5.57967e-207	0.626206	0.335	0.11	8.54805e-203	4	Pmaip1
Btf3	1.21147e-206	0.413626	0.91	0.852	1.85598e-202	4	Btf3
Prdx5	3.91086e-206	0.640031	0.816	0.738	5.99144e-202	4	Prdx5
Il1b1	6.66585e-205	1.31712	0.569	0.273	1.02121e-200	4	Il1b
Hspa8	1.86524e-204	0.462622	0.964	0.948	2.85755e-200	4	Hspa8
Nadk	3.39322e-204	0.577238	0.495	0.229	5.19841e-200	4	Nadk
Rpl36	2.0345e-202	0.41113	0.963	0.934	3.11685e-198	4	Rpl36
Klf4	8.58657e-200	0.667051	0.438	0.141	1.31546e-195	4	Klf4
Rpl28	4.64072e-196	0.39069	0.975	0.957	7.10959e-192	4	Rpl28
Atp5l	5.95045e-193	0.451148	0.861	0.729	9.11608e-189	4	Atp5l
Ucp2	2.47983e-191	0.470338	0.862	0.799	3.79909e-187	4	Ucp2
Serp1	4.11554e-190	0.532324	0.707	0.519	6.305e-186	4	Serp1
Actb	5.33049e-189	0.41541	0.997	0.988	8.16631e-185	4	Actb
H2afz	3.59124e-188	0.547379	0.901	0.82	5.50177e-184	4	H2afz
Pfn1	8.11686e-188	0.42064	0.946	0.921	1.2435e-183	4	Pfn1
Rps19	4.65475e-186	0.417243	0.973	0.955	7.13108e-182	4	Rps19
Rpl37a	6.15996e-186	0.349554	0.981	0.964	9.43705e-182	4	Rpl37a
Fau	8.27281e-183	0.340111	0.994	0.977	1.2674e-178	4	Fau
H2-Q7	1.51061e-177	0.703568	0.377	0.152	2.31425e-173	4	H2-Q7
1700025G04Rik	5.87255e-176	0.340044	0.291	0.069	8.99675e-172	4	1700025G04Rik
Tpm4	5.06797e-175	0.504378	0.522	0.244	7.76413e-171	4	Tpm4
Txn1	1.19152e-174	0.55927	0.688	0.435	1.82541e-170	4	Txn1
Fam107b	4.82869e-173	0.43596	0.362	0.125	7.39756e-169	4	Fam107b
Rack11	8.59066e-170	0.394598	0.956	0.936	1.31609e-165	4	Rack1
Rps18	9.0398e-170	0.369198	0.962	0.949	1.3849e-165	4	Rps18
Myl12b	2.97232e-169	0.429331	0.841	0.728	4.55359e-165	4	Myl12b
Rpl19	4.81588e-169	0.357622	0.987	0.969	7.37793e-165	4	Rpl19
Bcl2a1d	5.1577e-169	0.554775	0.365	0.132	7.9016e-165	4	Bcl2a1d
Taldo1	1.26435e-168	0.498637	0.804	0.71	1.93699e-164	4	Taldo1
Ptma	1.40918e-167	0.423468	0.961	0.925	2.15887e-163	4	Ptma
Cdk2ap2	2.18381e-166	0.551994	0.637	0.466	3.3456e-162	4	Cdk2ap2
Scand1	6.30768e-166	0.464895	0.739	0.565	9.66337e-162	4	Scand1
Glud1	6.90534e-164	0.463915	0.682	0.49	1.0579e-159	4	Glud1
Rps24	1.23044e-163	0.356158	0.996	0.977	1.88503e-159	4	Rps24
Rps28	2.5003e-163	0.362137	0.937	0.9	3.83046e-159	4	Rps28
Eif3f	7.46249e-163	0.403136	0.879	0.821	1.14325e-158	4	Eif3f
Dbi	3.86522e-161	0.488187	0.707	0.498	5.92152e-157	4	Dbi
Atp5h	9.04841e-161	0.411382	0.883	0.77	1.38622e-156	4	Atp5h
Rpl23	1.09059e-159	0.349224	0.989	0.971	1.67078e-155	4	Rpl23
Ccl6	1.88825e-159	0.636318	0.585	0.517	2.8928e-155	4	Ccl6
Rps15a	7.60296e-159	0.354659	0.975	0.962	1.16477e-154	4	Rps15a
Rps7	9.83889e-159	0.386877	0.971	0.959	1.50732e-154	4	Rps7
Fam49a	1.7665e-158	0.394127	0.315	0.089	2.70628e-154	4	Fam49a
Prr13	8.86274e-158	0.533535	0.655	0.445	1.35777e-153	4	Prr13
Naca	1.02736e-157	0.353127	0.935	0.912	1.57392e-153	4	Naca
Cast	1.25364e-157	0.43582	0.486	0.212	1.92058e-153	4	Cast
Abracl	1.01279e-155	0.455557	0.689	0.472	1.5516e-151	4	Abracl
Sptbn1	1.37277e-153	0.39077	0.305	0.083	2.10309e-149	4	Sptbn1
Tkt	2.73592e-153	0.486049	0.725	0.585	4.19143e-149	4	Tkt
Ybx1	3.42567e-153	0.391974	0.906	0.803	5.24813e-149	4	Ybx1
Pid1	6.03973e-153	0.486746	0.677	0.531	9.25286e-149	4	Pid1
Clic4	8.78983e-153	0.458437	0.318	0.101	1.3466e-148	4	Clic4
Gpi1	1.36197e-150	0.421821	0.752	0.604	2.08653e-146	4	Gpi1
Gmfg	1.123e-149	0.467604	0.741	0.569	1.72044e-145	4	Gmfg
Myo5a	4.40869e-149	0.382389	0.334	0.102	6.75411e-145	4	Myo5a
Rps3a1	1.39482e-148	0.316888	0.983	0.968	2.13687e-144	4	Rps3a1
Adssl1	1.03825e-146	0.361885	0.299	0.09	1.5906e-142	4	Adssl1
Csf2ra	4.6168e-146	0.463289	0.636	0.427	7.07294e-142	4	Csf2ra
Nabp1	1.42816e-145	0.343796	0.251	0.059	2.18794e-141	4	Nabp1
Klf13	4.17032e-145	0.491851	0.602	0.391	6.38893e-141	4	Klf13
Fam129a	2.18296e-144	0.42579	0.482	0.231	3.3443e-140	4	Fam129a
Cd72	2.36738e-142	0.641788	0.272	0.125	3.62683e-138	4	Cd72
Dusp1	8.77262e-141	0.741015	0.634	0.413	1.34396e-136	4	Dusp1
Ybx3	5.23769e-140	0.405276	0.424	0.191	8.02414e-136	4	Ybx3
Epsti1	3.79214e-139	0.523221	0.583	0.374	5.80955e-135	4	Epsti1
Sec61b	1.07443e-138	0.416311	0.815	0.685	1.64603e-134	4	Sec61b
Rplp0	1.49236e-138	0.371119	0.976	0.963	2.2863e-134	4	Rplp0
Rpl10	1.18181e-136	0.301447	0.975	0.961	1.81053e-132	4	Rpl10
Rpl24	7.7428e-136	0.345476	0.962	0.942	1.1862e-131	4	Rpl24
Rbpj	8.32848e-135	0.46636	0.543	0.366	1.27592e-130	4	Rbpj
Rpl35a	1.12509e-134	0.280512	0.985	0.969	1.72364e-130	4	Rpl35a
Atox1	2.07532e-134	0.39969	0.844	0.758	3.1794e-130	4	Atox1
Serf2	1.7447e-133	0.331973	0.939	0.9	2.67288e-129	4	Serf2
Cdkn2d	4.21907e-131	0.379836	0.331	0.117	6.46362e-127	4	Cdkn2d
Rpl13	1.34891e-130	0.316201	0.994	0.977	2.06653e-126	4	Rpl13
Limd1	1.89898e-130	0.281875	0.305	0.094	2.90923e-126	4	Limd1
Capg	4.84897e-130	0.528184	0.424	0.276	7.42862e-126	4	Capg
Grk3	1.12337e-129	0.485505	0.42	0.199	1.721e-125	4	Grk3
Aes	1.90076e-129	0.436134	0.782	0.593	2.91197e-125	4	Aes
Rps3	1.45744e-128	0.282408	0.982	0.964	2.23279e-124	4	Rps3
Shisa5	2.41867e-128	0.461022	0.698	0.553	3.7054e-124	4	Shisa5
Rftn1	1.63449e-127	0.283404	0.283	0.081	2.50404e-123	4	Rftn1
Add3	2.61683e-126	0.429992	0.423	0.234	4.00898e-122	4	Add3
Tmsb4x	4.98526e-126	0.269117	0.998	0.992	7.63742e-122	4	Tmsb4x
Ccdc88a	6.13413e-126	0.467326	0.537	0.312	9.39749e-122	4	Ccdc88a
Rpl17	1.22694e-125	0.314942	0.974	0.96	1.87968e-121	4	Rpl17
Rap2b	1.4217e-125	0.366633	0.35	0.13	2.17804e-121	4	Rap2b
Taf10	2.14481e-125	0.390531	0.721	0.508	3.28585e-121	4	Taf10
Tnfsf9	2.70445e-125	0.882638	0.273	0.101	4.14322e-121	4	Tnfsf9
Bri3bp	3.48663e-124	0.305036	0.329	0.115	5.34152e-120	4	Bri3bp
Ostf1	8.94409e-124	0.376946	0.831	0.706	1.37024e-119	4	Ostf1
Rpl7	2.42773e-123	0.284485	0.964	0.95	3.71929e-119	4	Rpl7
Glipr1	2.45757e-122	0.370416	0.36	0.149	3.765e-118	4	Glipr1
Lbh	3.44107e-122	0.302884	0.292	0.092	5.27172e-118	4	Lbh
H2-T23	4.89654e-122	0.400867	0.782	0.67	7.5015e-118	4	H2-T23
Rras	5.39082e-122	0.403895	0.392	0.196	8.25873e-118	4	Rras
Degs1	6.59989e-121	0.410644	0.512	0.305	1.0111e-116	4	Degs1
Prdx1	2.96702e-120	0.409801	0.84	0.735	4.54548e-116	4	Prdx1
Ifi27l2a1	4.58602e-120	0.602528	0.615	0.349	7.02578e-116	4	Ifi27l2a
Cox5a	6.55633e-120	0.403689	0.771	0.614	1.00443e-115	4	Cox5a
Rpl22	1.2697e-116	0.293347	0.957	0.936	1.94518e-112	4	Rpl22
Myadm	6.66972e-116	0.369743	0.433	0.215	1.0218e-111	4	Myadm
Eif5a	1.41246e-115	0.383047	0.848	0.714	2.16389e-111	4	Eif5a
B4galnt1	2.9698e-115	0.390645	0.36	0.173	4.54973e-111	4	B4galnt1
Eif3h	7.82949e-115	0.339895	0.838	0.744	1.19948e-110	4	Eif3h
Rps27a1	8.00968e-115	0.28931	0.986	0.972	1.22708e-110	4	Rps27a
Sri	2.52294e-114	0.386272	0.67	0.485	3.86515e-110	4	Sri
Mbp	9.45526e-114	0.340916	0.307	0.113	1.44855e-109	4	Mbp
Rps9	1.07869e-113	0.299671	0.977	0.966	1.65255e-109	4	Rps9
Cers6	1.51083e-112	0.292843	0.282	0.093	2.31459e-108	4	Cers6
Ppp2r5a	1.67786e-111	0.403889	0.491	0.277	2.57047e-107	4	Ppp2r5a
Trim25	2.38665e-111	0.353797	0.319	0.124	3.65635e-107	4	Trim25
Eif3k	2.67468e-111	0.342503	0.816	0.71	4.09761e-107	4	Eif3k
Rpl27	1.4255e-110	0.34975	0.834	0.727	2.18386e-106	4	Rpl27
Cbfa2t3	4.77743e-110	0.43059	0.469	0.263	7.31903e-106	4	Cbfa2t3
Lmo4	1.32263e-109	0.376554	0.453	0.235	2.02627e-105	4	Lmo4
Fam69a	4.53632e-108	0.266426	0.365	0.148	6.94964e-104	4	Fam69a
Svil	2.64994e-107	0.31541	0.292	0.106	4.05971e-103	4	Svil
Arf5	1.95436e-105	0.32025	0.819	0.718	2.99408e-101	4	Arf5
Hsp90ab1	1.26737e-104	0.299375	0.955	0.936	1.94161e-100	4	Hsp90ab1
Nop10	2.86082e-104	0.363943	0.601	0.377	4.38278e-100	4	Nop10
Cd48	4.80589e-103	0.365577	0.749	0.589	7.36262e-99	4	Cd48
Trappc5	7.57331e-103	0.332904	0.403	0.208	1.16023e-98	4	Trappc5
Myl12a	1.84544e-102	0.361201	0.732	0.569	2.82722e-98	4	Myl12a
Cebpb	1.98946e-102	0.606966	0.68	0.795	3.04785e-98	4	Cebpb
Klf2	4.13179e-102	0.606475	0.478	0.247	6.3299e-98	4	Klf2
Srebf2	1.38179e-101	0.290193	0.317	0.125	2.1169e-97	4	Srebf2
Rps10	2.34007e-101	0.257105	0.987	0.969	3.58498e-97	4	Rps10
Psmb9	9.98907e-101	0.368245	0.654	0.464	1.53032e-96	4	Psmb9
Rbm3	2.327e-100	0.371528	0.771	0.642	3.56497e-96	4	Rbm3
Rassf4	2.71384e-100	0.392274	0.64	0.487	4.15761e-96	4	Rassf4
Rpl39	3.26939e-100	0.275479	0.975	0.962	5.0087e-96	4	Rpl39
Esyt1	9.64723e-100	0.302961	0.34	0.142	1.47796e-95	4	Esyt1
Cdkn1a	3.71823e-98	0.504793	0.392	0.184	5.69633e-94	4	Cdkn1a
Hpcal1	1.10518e-97	0.283435	0.417	0.203	1.69313e-93	4	Hpcal1
Mbd2	3.93219e-97	0.343318	0.537	0.323	6.02411e-93	4	Mbd2
Slk	1.5848e-96	0.366793	0.498	0.29	2.42792e-92	4	Slk
Arhgap18	8.83898e-96	0.301106	0.333	0.14	1.35413e-91	4	Arhgap18
Csrnp1	3.1067e-95	0.372757	0.332	0.165	4.75946e-91	4	Csrnp1
Ncf4	9.25311e-95	0.372065	0.486	0.364	1.41758e-90	4	Ncf4
Rps81	1.63695e-93	0.267351	0.975	0.969	2.5078e-89	4	Rps8
Atp5e	2.37204e-92	0.310447	0.883	0.792	3.63397e-88	4	Atp5e
Rpl321	2.64209e-92	0.278636	0.986	0.967	4.04768e-88	4	Rpl32
Cycs	6.9528e-91	0.356821	0.528	0.343	1.06517e-86	4	Cycs
Rpl18a	1.21639e-90	0.254718	0.986	0.969	1.86351e-86	4	Rpl18a
Lrrfip1	2.7632e-90	0.388251	0.614	0.447	4.23323e-86	4	Lrrfip1
Arhgap9	1.55743e-89	0.315984	0.406	0.206	2.38599e-85	4	Arhgap9
Dynll1	4.65882e-89	0.352819	0.754	0.632	7.13731e-85	4	Dynll1
Tsc22d3	3.99079e-87	0.405798	0.503	0.294	6.11389e-83	4	Tsc22d3
Ubb	4.28856e-87	0.278091	0.978	0.96	6.57007e-83	4	Ubb
Ikbkb	2.90704e-86	0.358567	0.589	0.391	4.45359e-82	4	Ikbkb
Ifi204	3.33911e-86	0.441358	0.341	0.156	5.11551e-82	4	Ifi204
Mpp1	2.14975e-85	0.30342	0.34	0.171	3.29341e-81	4	Mpp1
Nab1	2.37125e-84	0.280033	0.346	0.159	3.63275e-80	4	Nab1
Anp32b	2.72862e-84	0.352581	0.727	0.536	4.18025e-80	4	Anp32b
Ost4	2.01575e-83	0.333506	0.742	0.58	3.08812e-79	4	Ost4
Rel	3.35536e-83	0.431356	0.582	0.485	5.14041e-79	4	Rel
D8Ertd738e	4.95641e-83	0.319422	0.78	0.643	7.59322e-79	4	D8Ertd738e
Rps261	6.24073e-83	0.280912	0.939	0.925	9.56079e-79	4	Rps26
Cox6b1	3.5351e-82	0.304511	0.844	0.734	5.41578e-78	4	Cox6b1
2020-09-11	4.61477e-82	0.283759	0.259	0.102	7.06983e-78	4	2020-09-11
Dusp2	4.972e-81	0.64465	0.331	0.159	7.6171e-77	4	Dusp2
Nap1l1	9.53431e-81	0.337806	0.611	0.42	1.46066e-76	4	Nap1l1
Anxa6	2.15908e-80	0.281534	0.359	0.178	3.3077e-76	4	Anxa6
Btg1	8.82548e-80	0.444763	0.847	0.832	1.35206e-75	4	Btg1
Siva1	2.045e-79	0.264394	0.354	0.172	3.13295e-75	4	Siva1
Ctnna1	4.14181e-79	0.329339	0.439	0.259	6.34525e-75	4	Ctnna1
Tmem176a	5.38462e-79	0.284126	0.679	0.748	8.24923e-75	4	Tmem176a
Fos1	6.0838e-79	0.559003	0.681	0.486	9.32039e-75	4	Fos
Lrrfip2	9.38201e-79	0.254068	0.38	0.187	1.43732e-74	4	Lrrfip2
Nt5c	5.2254e-78	0.289099	0.464	0.265	8.00531e-74	4	Nt5c
Dnaja1	8.03953e-78	0.429441	0.75	0.625	1.23166e-73	4	Dnaja1
Scp2	1.73366e-77	0.339719	0.727	0.578	2.65597e-73	4	Scp2
Mapkapk2	4.36859e-77	0.369817	0.549	0.371	6.69267e-73	4	Mapkapk2
Sp140	8.51213e-76	0.30408	0.37	0.195	1.30406e-71	4	Sp140
Rraga	1.00333e-75	0.318953	0.443	0.277	1.5371e-71	4	Rraga
Ap1s2	1.40286e-75	0.350327	0.495	0.33	2.14918e-71	4	Ap1s2
S100a13	5.14849e-75	0.339475	0.555	0.373	7.88749e-71	4	S100a13
Phf11b	8.45315e-75	0.335686	0.334	0.164	1.29502e-70	4	Phf11b
Chchd2	2.0181e-74	0.263253	0.898	0.837	3.09173e-70	4	Chchd2
Eef2	2.58665e-74	0.25351	0.912	0.882	3.96275e-70	4	Eef2
Trib1	1.18494e-73	0.337724	0.376	0.21	1.81532e-69	4	Trib1
Dok3	1.92594e-73	0.281519	0.297	0.158	2.95054e-69	4	Dok3
Hnrnpf	7.38506e-73	0.264202	0.857	0.8	1.13139e-68	4	Hnrnpf
Eif3e	1.82017e-71	0.290713	0.73	0.621	2.7885e-67	4	Eif3e
Stk24	3.97484e-71	0.319916	0.469	0.284	6.08946e-67	4	Stk24
Sf3b6	5.67331e-71	0.304042	0.618	0.441	8.69151e-67	4	Sf3b6
Ndufa6	7.02859e-71	0.295724	0.75	0.636	1.07678e-66	4	Ndufa6
Psme1	8.97445e-70	0.305705	0.832	0.732	1.37489e-65	4	Psme1
Baz1a	1.26166e-69	0.284571	0.495	0.303	1.93287e-65	4	Baz1a
Plekho2	3.26867e-69	0.27462	0.417	0.226	5.0076e-65	4	Plekho2
Chmp2a	5.85705e-69	0.29733	0.709	0.542	8.973e-65	4	Chmp2a
Jarid2	6.50786e-69	0.261794	0.375	0.196	9.97004e-65	4	Jarid2
Dnajb1	9.066e-69	0.585121	0.389	0.246	1.38891e-64	4	Dnajb1
Sap30	1.62638e-68	0.268635	0.355	0.184	2.49162e-64	4	Sap30
Gyg	2.63963e-68	0.294047	0.316	0.169	4.04391e-64	4	Gyg
Clec4a3	8.80312e-68	0.380109	0.588	0.515	1.34864e-63	4	Clec4a3
Kdm6b	6.06756e-67	0.387098	0.42	0.262	9.29551e-63	4	Kdm6b
Marcksl1	3.7312e-66	0.402561	0.334	0.185	5.7162e-62	4	Marcksl1
Igsf6	1.2326e-64	0.344137	0.529	0.374	1.88834e-60	4	Igsf6
Taok3	1.51294e-64	0.258808	0.535	0.34	2.31783e-60	4	Taok3
Smim14	2.62131e-64	0.306994	0.6	0.441	4.01585e-60	4	Smim14
Rps27l	3.46444e-64	0.336212	0.689	0.56	5.30752e-60	4	Rps27l
Ptpn6	6.12821e-64	0.321632	0.716	0.604	9.38841e-60	4	Ptpn6
Ethe1	6.39793e-64	0.280406	0.314	0.184	9.80162e-60	4	Ethe1
Sumo1	2.10664e-63	0.28994	0.638	0.475	3.22738e-59	4	Sumo1
Rin3	3.05286e-63	0.258173	0.382	0.208	4.67698e-59	4	Rin3
Cox5b	7.63345e-63	0.271998	0.786	0.661	1.16944e-58	4	Cox5b
Malt1	1.54506e-62	0.331366	0.36	0.208	2.36703e-58	4	Malt1
Dnajc15	1.86392e-62	0.27171	0.44	0.267	2.85552e-58	4	Dnajc15
Tmem123	4.61083e-62	0.317432	0.335	0.176	7.06379e-58	4	Tmem123
Etv3	5.27238e-62	0.398478	0.354	0.257	8.07728e-58	4	Etv3
Birc3	6.67042e-62	0.265595	0.375	0.209	1.02191e-57	4	Birc3
Ifrd1	2.43367e-61	0.479302	0.494	0.346	3.72838e-57	4	Ifrd1
Snx3	4.0515e-61	0.285777	0.738	0.614	6.20689e-57	4	Snx3
Cmpk1	1.20302e-60	0.278516	0.635	0.471	1.84303e-56	4	Cmpk1
Hspa1b1	2.33438e-60	0.520485	0.558	0.37	3.57626e-56	4	Hspa1b
Rpl36al	1.09556e-59	0.277648	0.689	0.549	1.6784e-55	4	Rpl36al
Smdt1	1.14422e-59	0.294933	0.722	0.596	1.75294e-55	4	Smdt1
Dazap2	1.17427e-59	0.269884	0.677	0.516	1.79899e-55	4	Dazap2
Nop53	1.25226e-59	0.289894	0.579	0.41	1.91847e-55	4	Nop53
Cox6c	1.54418e-59	0.273681	0.821	0.716	2.36568e-55	4	Cox6c
Nfkbiz	2.38148e-59	0.410118	0.537	0.365	3.64842e-55	4	Nfkbiz
Tmcc1	2.93933e-57	0.340667	0.455	0.306	4.50306e-53	4	Tmcc1
Hcst	3.29849e-57	0.319316	0.292	0.191	5.05329e-53	4	Hcst
Tma7	8.84881e-57	0.254688	0.78	0.657	1.35564e-52	4	Tma7
Capns1	1.79128e-56	0.273424	0.712	0.577	2.74425e-52	4	Capns1
Cox7b	3.00628e-56	0.263852	0.703	0.558	4.60562e-52	4	Cox7b
Ccl9	1.45433e-55	0.34818	0.444	0.36	2.22803e-51	4	Ccl9
Blvrb	1.83354e-55	0.291272	0.444	0.442	2.80898e-51	4	Blvrb
Stk10	2.3509e-55	0.333193	0.42	0.302	3.60158e-51	4	Stk10
Esd	1.11108e-54	0.264742	0.669	0.532	1.70217e-50	4	Esd
Psme2	3.71822e-54	0.312337	0.682	0.554	5.69631e-50	4	Psme2
Sumo2	8.79431e-54	0.257324	0.816	0.724	1.34729e-49	4	Sumo2
Rab8a	1.45794e-53	0.256394	0.46	0.293	2.23356e-49	4	Rab8a
Bst2	1.46969e-53	0.35257	0.693	0.651	2.25157e-49	4	Bst2
Aprt	1.64724e-53	0.319758	0.487	0.378	2.52358e-49	4	Aprt
Tpd52	3.34877e-53	0.294858	0.633	0.571	5.13032e-49	4	Tpd52
Tomm7	3.47733e-53	0.260535	0.727	0.587	5.32727e-49	4	Tomm7
Pde4b	8.18443e-53	0.252914	0.312	0.169	1.25385e-48	4	Pde4b
Eps15	9.85991e-53	0.266923	0.443	0.277	1.51054e-48	4	Eps15
Nsa2	9.91562e-53	0.256455	0.751	0.65	1.51907e-48	4	Nsa2
Fosb	1.0004e-52	0.271519	0.358	0.198	1.53261e-48	4	Fosb
Ctsc	1.11323e-52	0.294204	0.803	0.84	1.70547e-48	4	Ctsc
Foxp1	5.91533e-52	0.258057	0.531	0.358	9.06229e-48	4	Foxp1
Apobec1	3.56551e-51	0.264611	0.38	0.243	5.46236e-47	4	Apobec1
Snrpe	4.07154e-51	0.251136	0.688	0.546	6.2376e-47	4	Snrpe
Hmgb2	7.87723e-51	0.353525	0.652	0.475	1.20679e-46	4	Hmgb2
Tmpo	6.34862e-49	0.273385	0.45	0.284	9.72609e-45	4	Tmpo
Hspa1a1	1.78768e-48	0.519606	0.61	0.458	2.73873e-44	4	Hspa1a
Rilpl2	1.8106e-47	0.253417	0.34	0.195	2.77384e-43	4	Rilpl2
Sod2	1.30745e-43	0.259611	0.451	0.303	2.00301e-39	4	Sod2
Lcp1	2.68666e-43	0.259365	0.863	0.812	4.11596e-39	4	Lcp1
Stk38	1.4158e-41	0.266163	0.482	0.342	2.169e-37	4	Stk38
Spag9	3.25393e-40	0.280036	0.604	0.527	4.98502e-36	4	Spag9
Gpcpd1	4.13501e-40	0.252809	0.345	0.232	6.33483e-36	4	Gpcpd1
Gngt2	3.56315e-34	0.359721	0.65	0.727	5.45875e-30	4	Gngt2
Ugcg	1.82955e-31	0.263536	0.266	0.183	2.80286e-27	4	Ugcg
Cdkn1b	5.68272e-31	0.251888	0.497	0.384	8.70592e-27	4	Cdkn1b
Atp1a1	2.43406e-30	0.256138	0.52	0.422	3.72897e-26	4	Atp1a1
Stmn1	0	2.48553	0.959	0.256	0	5	Stmn1
Top2a	0	2.1802	0.788	0.026	0	5	Top2a
Mki67	0	2.12806	0.843	0.033	0	5	Mki67
Hist1h1b	0	2.07613	0.551	0.016	0	5	Hist1h1b
Hmgb21	0	2.03636	0.957	0.458	0	5	Hmgb2
Ube2c	0	1.91714	0.853	0.049	0	5	Ube2c
Birc5	0	1.86293	0.885	0.026	0	5	Birc5
Cenpf	0	1.84382	0.821	0.032	0	5	Cenpf
H2afz1	0	1.72437	0.975	0.816	0	5	H2afz
Hist1h2ae	0	1.66633	0.587	0.052	0	5	Hist1h2ae
Prc1	0	1.66135	0.701	0.011	0	5	Prc1
Tubb4b	0	1.64162	0.836	0.157	0	5	Tubb4b
Cenpa	0	1.61036	0.821	0.085	0	5	Cenpa
Tubb5	0	1.60285	0.965	0.699	0	5	Tubb5
Hmmr	0	1.58975	0.756	0.007	0	5	Hmmr
H2afx	0	1.58791	0.822	0.093	0	5	H2afx
Ube2s	0	1.49839	0.906	0.395	0	5	Ube2s
Cdca8	0	1.47782	0.82	0.028	0	5	Cdca8
Smc4	0	1.42288	0.795	0.097	0	5	Smc4
Smc2	0	1.40903	0.785	0.106	0	5	Smc2
Tuba1b	0	1.39523	0.913	0.575	0	5	Tuba1b
H2afv	0	1.38278	0.889	0.371	0	5	H2afv
Cks2	0	1.37488	0.807	0.126	0	5	Cks2
Pclaf	0	1.35921	0.699	0.022	0	5	Pclaf
Cenpe	0	1.35416	0.721	0.019	0	5	Cenpe
Arl6ip1	0	1.33858	0.949	0.864	0	5	Arl6ip1
Cdk1	0	1.32647	0.704	0.04	0	5	Cdk1
Nusap1	0	1.32256	0.668	0.006	0	5	Nusap1
Ifi27l2a2	0	1.30296	0.822	0.34	0	5	Ifi27l2a
Ccnb2	0	1.2909	0.751	0.028	0	5	Ccnb2
Hist1h2ap	0	1.26637	0.523	0.057	0	5	Hist1h2ap
Cdc20	0	1.25845	0.686	0.012	0	5	Cdc20
Hist1h1e	0	1.23254	0.661	0.304	0	5	Hist1h1e
Cks1b	0	1.22799	0.772	0.056	0	5	Cks1b
Tpx2	0	1.19355	0.727	0.011	0	5	Tpx2
Hmgn2	0	1.18321	0.842	0.31	0	5	Hmgn2
Knl1	0	1.16438	0.677	0.012	0	5	Knl1
Cdca3	0	1.15717	0.731	0.023	0	5	Cdca3
Tmpo1	0	1.13799	0.796	0.265	0	5	Tmpo
Racgap1	0	1.12303	0.731	0.025	0	5	Racgap1
Lmnb1	0	1.11883	0.761	0.1	0	5	Lmnb1
Ccna2	0	1.11481	0.682	0.007	0	5	Ccna2
Kif11	0	1.0968	0.633	0.007	0	5	Kif11
Pbk	0	1.09233	0.587	0.006	0	5	Pbk
Ran	0	1.05375	0.889	0.598	0	5	Ran
Nucks1	0	1.03372	0.861	0.438	0	5	Nucks1
Ckap2l	0	1.03194	0.663	0.014	0	5	Ckap2l
Ccnb1	0	1.02697	0.627	0.006	0	5	Ccnb1
Anp32b1	0	0.996546	0.895	0.528	0	5	Anp32b
Hmgb1	0	0.979108	0.948	0.825	0	5	Hmgb1
Spc24	0	0.976836	0.646	0.018	0	5	Spc24
Knstrn	0	0.960718	0.676	0.036	0	5	Knstrn
Aspm	0	0.954963	0.546	0.004	0	5	Aspm
Kif20b	0	0.949138	0.596	0.023	0	5	Kif20b
Hist2h2ac	0	0.939346	0.441	0.048	0	5	Hist2h2ac
Cdkn2c	0	0.938235	0.616	0.063	0	5	Cdkn2c
Cdkn1a1	0	0.915088	0.625	0.172	0	5	Cdkn1a
Kif23	0	0.91317	0.597	0.011	0	5	Kif23
Prdx4	0	0.904873	0.827	0.391	0	5	Prdx4
Cdkn3	0	0.902628	0.618	0.019	0	5	Cdkn3
Esco2	0	0.893986	0.439	0.005	0	5	Esco2
Dek	0	0.884095	0.832	0.51	0	5	Dek
Ptma1	0	0.880294	0.975	0.925	0	5	Ptma
Ppia	0	0.880197	0.989	0.954	0	5	Ppia
Selenoh	0	0.87815	0.768	0.285	0	5	Selenoh
Hjurp	0	0.875531	0.599	0.241	0	5	Hjurp
Incenp	0	0.874426	0.607	0.062	0	5	Incenp
Tacc3	0	0.862375	0.63	0.034	0	5	Tacc3
Ezh2	0	0.855783	0.593	0.067	0	5	Ezh2
Dlgap5	0	0.847131	0.566	0.008	0	5	Dlgap5
Emp31	0	0.843695	0.792	0.334	0	5	Emp3
Kif15	0	0.841263	0.571	0.02	0	5	Kif15
Anp32e	0	0.829922	0.787	0.342	0	5	Anp32e
Anln	0	0.829544	0.541	0.008	0	5	Anln
Jpt1	0	0.829375	0.86	0.574	0	5	Jpt1
Tk1	0	0.824912	0.498	0.025	0	5	Tk1
Mis18bp1	0	0.823819	0.508	0.013	0	5	Mis18bp1
Calm3	0	0.817572	0.821	0.436	0	5	Calm3
Ckap5	0	0.811096	0.711	0.24	0	5	Ckap5
Nuf2	0	0.808978	0.588	0.008	0	5	Nuf2
Hist1h3c	0	0.801802	0.377	0.004	0	5	Hist1h3c
Pimreg	0	0.799024	0.524	0.003	0	5	Pimreg
Rrm2	0	0.795164	0.384	0.007	0	5	Rrm2
Tuba1c	0	0.794163	0.593	0.086	0	5	Tuba1c
Aurkb	0	0.783881	0.534	0.016	0	5	Aurkb
Txn11	0	0.769878	0.809	0.431	0	5	Txn1
Kif22	0	0.767456	0.547	0.006	0	5	Kif22
Bub1b	0	0.754749	0.559	0.011	0	5	Bub1b
Rad21	0	0.752758	0.741	0.3	0	5	Rad21
Ccdc34	0	0.746617	0.635	0.147	0	5	Ccdc34
Ndc80	0	0.746607	0.503	0.008	0	5	Ndc80
Sgo2a	0	0.744816	0.506	0.007	0	5	Sgo2a
Ckap2	0	0.743965	0.519	0.008	0	5	Ckap2
Kif4	0	0.737077	0.504	0.005	0	5	Kif4
Ncapd2	0	0.736676	0.564	0.023	0	5	Ncapd2
Tyms	0	0.735758	0.502	0.09	0	5	Tyms
Diaph3	0	0.734318	0.543	0.017	0	5	Diaph3
Hist1h2ab	0	0.728319	0.388	0.008	0	5	Hist1h2ab
Plk1	0	0.726753	0.508	0.004	0	5	Plk1
Cit	0	0.722971	0.505	0.013	0	5	Cit
Bub1	0	0.721564	0.542	0.006	0	5	Bub1
Lockd	0	0.718434	0.57	0.012	0	5	Lockd
Rrm1	0	0.696294	0.536	0.077	0	5	Rrm1
Fbxo5	0	0.690573	0.424	0.028	0	5	Fbxo5
Cdkn2d1	0	0.683537	0.535	0.107	0	5	Cdkn2d
Cbx5	0	0.681348	0.58	0.117	0	5	Cbx5
Aurka	0	0.672512	0.472	0.008	0	5	Aurka
Asf1b	0	0.671456	0.481	0.022	0	5	Asf1b
Ybx11	0	0.669568	0.931	0.803	0	5	Ybx1
Hmgn1	0	0.66733	0.839	0.584	0	5	Hmgn1
Dnajc9	0	0.652279	0.534	0.103	0	5	Dnajc9
Nde1	0	0.650503	0.633	0.175	0	5	Nde1
Spc25	0	0.647161	0.476	0.012	0	5	Spc25
Cdca2	0	0.64457	0.457	0.005	0	5	Cdca2
Rdm1	0	0.633532	0.603	0.148	0	5	Rdm1
Gapdh	0	0.632308	0.936	0.883	0	5	Gapdh
Rad51ap1	0	0.630274	0.455	0.019	0	5	Rad51ap1
Cep55	0	0.613041	0.458	0.005	0	5	Cep55
Trim59	0	0.606835	0.43	0.014	0	5	Trim59
Kif2c	0	0.606447	0.474	0.012	0	5	Kif2c
Dbf4	0	0.599299	0.514	0.07	0	5	Dbf4
Cenpm	0	0.596926	0.461	0.014	0	5	Cenpm
Reep4	0	0.59237	0.535	0.117	0	5	Reep4
Shcbp1	0	0.58202	0.454	0.009	0	5	Shcbp1
Rangap1	0	0.574741	0.593	0.141	0	5	Rangap1
Kif20a	0	0.569197	0.454	0.003	0	5	Kif20a
Clspn	0	0.560351	0.348	0.019	0	5	Clspn
Ncapg	0	0.559203	0.445	0.005	0	5	Ncapg
Hist1h1a	0	0.552088	0.31	0.007	0	5	Hist1h1a
Oaz1	0	0.547309	0.943	0.901	0	5	Oaz1
Ube2t	0	0.543572	0.394	0.013	0	5	Ube2t
Gas2l3	0	0.524389	0.412	0.036	0	5	Gas2l3
Melk	0	0.519993	0.409	0.004	0	5	Melk
Prr11	0	0.500435	0.396	0.004	0	5	Prr11
Sgo1	0	0.482311	0.367	0.005	0	5	Sgo1
Plk4	0	0.48013	0.415	0.033	0	5	Plk4
Ncapg2	0	0.4762	0.354	0.031	0	5	Ncapg2
Ect2	0	0.470159	0.394	0.007	0	5	Ect2
Ccnf	0	0.440276	0.336	0.006	0	5	Ccnf
Neil3	0	0.438884	0.359	0.004	0	5	Neil3
Nek2	0	0.426287	0.356	0.001	0	5	Nek2
Mxd3	0	0.424914	0.301	0.002	0	5	Mxd3
Psrc1	0	0.397719	0.323	0.011	0	5	Psrc1
Mad2l1	0	0.397417	0.363	0.024	0	5	Mad2l1
Spdl1	0	0.391048	0.308	0.011	0	5	Spdl1
Cenpn	0	0.387082	0.326	0.009	0	5	Cenpn
Cenpw	0	0.374233	0.321	0.014	0	5	Cenpw
Kif18a	0	0.371663	0.287	0.008	0	5	Kif18a
Bora	0	0.370561	0.309	0.019	0	5	Bora
Foxm1	0	0.369645	0.331	0.006	0	5	Foxm1
Cdkn2a	0	0.368795	0.343	0.021	0	5	Cdkn2a
Ccdc18	0	0.36269	0.28	0.008	0	5	Ccdc18
Rad51	0	0.358834	0.279	0.008	0	5	Rad51
Spag5	0	0.352658	0.3	0.002	0	5	Spag5
Cdca5	0	0.352431	0.281	0.005	0	5	Cdca5
Kifc1	0	0.349552	0.289	0.003	0	5	Kifc1
C330027C09Rik	0	0.345235	0.291	0.007	0	5	C330027C09Rik
Troap	0	0.341797	0.286	0.002	0	5	Troap
Cenpk	0	0.341033	0.283	0.013	0	5	Cenpk
Brip1	0	0.340905	0.28	0.01	0	5	Brip1
Cenpp	0	0.338869	0.313	0.017	0	5	Cenpp
Depdc1a	0	0.334288	0.255	0.002	0	5	Depdc1a
Zwilch	0	0.334199	0.267	0.007	0	5	Zwilch
E2f8	0	0.330951	0.254	0.007	0	5	E2f8
Ttk	0	0.324202	0.261	0.002	0	5	Ttk
Ska1	0	0.309512	0.251	0.003	0	5	Ska1
Arhgef39	0	0.307806	0.27	0.007	0	5	Arhgef39
Pmf1	2.934749936297e-321	0.444484	0.448	0.071	4.49603690240701e-317	5	Pmf1
Iqgap3	7.34176609063634e-319	0.38981	0.34	0.031	1.12475856508549e-314	5	Iqgap3
Sae1	0	0.590338	0.604	0.18	1.83329e-304	5	Sae1
Gmnn	6.8485e-308	0.521547	0.413	0.063	1.04919e-303	5	Gmnn
Hirip3	7.21473e-308	0.545028	0.447	0.078	1.1053e-303	5	Hirip3
Fignl1	1.46597e-307	0.332132	0.284	0.018	2.24587e-303	5	Fignl1
Hist1h1d	2.13741e-307	0.640154	0.443	0.075	3.27451e-303	5	Hist1h1d
Lsm2	8.12551e-307	0.61816	0.641	0.209	1.24483e-302	5	Lsm2
Tagln21	1.83548e-306	0.767392	0.741	0.34	2.81196e-302	5	Tagln2
Tmsb4x1	2.87885e-306	0.509232	1	0.992	4.41039e-302	5	Tmsb4x
Hint1	2.92571e-304	0.593244	0.889	0.743	4.48219e-300	5	Hint1
Atad2	6.40937e-304	0.797412	0.507	0.141	9.81915e-300	5	Atad2
Ddx39	2.73462e-301	0.536702	0.599	0.166	4.18943e-297	5	Ddx39
Slc43a3	8.04844e-293	0.291617	0.274	0.018	1.23302e-288	5	Slc43a3
Ramp1	2.63191e-291	0.747377	0.775	0.416	4.03209e-287	5	Ramp1
Fkbp2	9.58669e-291	0.601879	0.859	0.638	1.46868e-286	5	Fkbp2
Bub3	7.90533e-286	0.660553	0.745	0.422	1.2111e-281	5	Bub3
Uhrf1	1.37185e-283	0.30943	0.262	0.016	2.10167e-279	5	Uhrf1
Clic1	1.81322e-283	0.443945	0.943	0.914	2.77786e-279	5	Clic1
Gm42047	1.04426e-282	0.650691	0.303	0.031	1.59981e-278	5	Gm42047
Banf1	1.15868e-269	0.618015	0.688	0.286	1.7751e-265	5	Banf1
Cenpl	1.31004e-269	0.32505	0.295	0.028	2.00699e-265	5	Cenpl
G2e3	1.1082e-261	0.516679	0.436	0.09	1.69776e-257	5	G2e3
Cenpq	2.9655e-261	0.354486	0.375	0.059	4.54315e-257	5	Cenpq
Gpx11	2.64284e-260	0.605802	0.91	0.775	4.04884e-256	5	Gpx1
Snrpd1	4.29361e-260	0.624188	0.709	0.34	6.5778e-256	5	Snrpd1
Cep128	1.89724e-259	0.293078	0.284	0.027	2.90657e-255	5	Cep128
Cmc2	1.23558e-258	0.460503	0.471	0.108	1.89291e-254	5	Cmc2
Hdgf	8.42122e-258	0.601724	0.703	0.33	1.29013e-253	5	Hdgf
Hist1h4d	6.44531e-254	0.606502	0.45	0.101	9.87422e-250	5	Hist1h4d
Fxyd51	2.54586e-249	0.376615	0.675	0.254	3.90025e-245	5	Fxyd5
Ulbp1	6.43902e-248	0.283264	0.27	0.025	9.86458e-244	5	Ulbp1
Ncapd3	4.40663e-243	0.587738	0.461	0.123	6.75096e-239	5	Ncapd3
Tspo1	8.80362e-241	0.65967	0.856	0.582	1.34871e-236	5	Tspo
Nt5dc2	1.44577e-240	0.388145	0.418	0.086	2.21491e-236	5	Nt5dc2
Syne2	1.24583e-239	0.338869	0.274	0.027	1.90862e-235	5	Syne2
H3f3a1	3.53329e-238	0.465054	0.961	0.916	5.41301e-234	5	H3f3a
Prim1	1.54274e-237	0.336464	0.287	0.032	2.36348e-233	5	Prim1
Nxt2	7.47419e-235	0.558438	0.57	0.203	1.14505e-230	5	Nxt2
Cenpc1	7.5425e-233	0.365031	0.362	0.062	1.15551e-228	5	Cenpc1
Lbr	1.03986e-232	0.44064	0.53	0.154	1.59306e-228	5	Lbr
Tmsb101	1.08154e-229	0.548086	0.856	0.508	1.65691e-225	5	Tmsb10
Smc1a	1.50556e-229	0.651977	0.764	0.475	2.30652e-225	5	Smc1a
Ncaph	3.14148e-229	0.398537	0.369	0.068	4.81275e-225	5	Ncaph
Psip1	4.57824e-224	0.540694	0.501	0.145	7.01386e-220	5	Psip1
Fen1	5.68679e-221	0.413816	0.401	0.087	8.71216e-217	5	Fen1
Cep112	2.09118e-219	0.293022	0.306	0.046	3.20368e-215	5	Cep112
Rbm31	3.75869e-219	0.552897	0.848	0.639	5.75832e-215	5	Rbm3
Nrm	4.19775e-219	0.524183	0.602	0.238	6.43096e-215	5	Nrm
Cbx3	2.1433e-218	0.587104	0.763	0.428	3.28353e-214	5	Cbx3
Haspin	8.81024e-217	0.349303	0.333	0.055	1.34973e-212	5	Haspin
Lmnb2	8.85729e-217	0.273793	0.26	0.028	1.35694e-212	5	Lmnb2
Mrpl51	6.5424e-216	0.524905	0.674	0.308	1.0023e-211	5	Mrpl51
Rfc5	1.26789e-215	0.289648	0.315	0.049	1.94241e-211	5	Rfc5
Rfc4	1.73054e-215	0.36493	0.335	0.057	2.65119e-211	5	Rfc4
Cdk5rap2	6.41251e-214	0.436706	0.411	0.093	9.82397e-210	5	Cdk5rap2
Rnaseh2c	3.51623e-213	0.561876	0.739	0.404	5.38686e-209	5	Rnaseh2c
Usp1	4.45039e-211	0.476374	0.505	0.153	6.818e-207	5	Usp1
Rpsa2	2.62537e-208	0.43938	0.99	0.959	4.02207e-204	5	Rpsa
Gatm	1.26565e-207	0.603039	0.824	0.563	1.93898e-203	5	Gatm
Cxcl10	4.66197e-207	1.37287	0.473	0.147	7.14213e-203	5	Cxcl10
Dut	7.79061e-207	0.462339	0.317	0.055	1.19352e-202	5	Dut
Cfl1	2.64223e-206	0.432675	0.935	0.912	4.04789e-202	5	Cfl1
Lmf2	8.54298e-205	0.350867	0.436	0.112	1.30878e-200	5	Lmf2
H1f0	1.35039e-204	0.608277	0.572	0.224	2.0688e-200	5	H1f0
Dbi1	5.43419e-204	0.570828	0.792	0.495	8.32518e-200	5	Dbi
Hnrnpa3	2.33903e-203	0.502908	0.867	0.699	3.5834e-199	5	Hnrnpa3
Cd521	5.94294e-203	0.533933	0.944	0.795	9.10459e-199	5	Cd52
Lsm5	1.8713e-201	0.485415	0.593	0.233	2.86683e-197	5	Lsm5
Nup37	2.16202e-198	0.290896	0.274	0.038	3.31222e-194	5	Nup37
Ncaph2	4.42277e-196	0.420653	0.515	0.169	6.77568e-192	5	Ncaph2
Sh3bgrl31	1.47757e-195	0.465207	0.948	0.908	2.26363e-191	5	Sh3bgrl3
Nes	1.65731e-195	0.277518	0.342	0.072	2.53901e-191	5	Nes
Cep89	2.27035e-195	0.379213	0.306	0.052	3.47818e-191	5	Cep89
Gng5	1.59324e-192	0.457116	0.936	0.871	2.44084e-188	5	Gng5
Arhgap11a	3.44792e-192	0.3441	0.413	0.106	5.28222e-188	5	Arhgap11a
Rps27l1	5.56014e-191	0.546338	0.809	0.554	8.51813e-187	5	Rps27l
Ly6e	9.56664e-191	0.427985	0.939	0.919	1.46561e-186	5	Ly6e
Mcm5	1.4672e-190	0.319531	0.301	0.051	2.24775e-186	5	Mcm5
Rnf26	6.88536e-189	0.323768	0.363	0.08	1.05484e-184	5	Rnf26
Tpm41	9.72783e-187	0.462137	0.602	0.242	1.4903e-182	5	Tpm4
Atpif1	6.58873e-186	0.507958	0.861	0.692	1.00939e-181	5	Atpif1
Nsd2	5.32937e-185	0.534778	0.521	0.194	8.16459e-181	5	Nsd2
Haus4	1.75916e-184	0.309066	0.341	0.072	2.69503e-180	5	Haus4
Hnrnpa1	2.50468e-183	0.506318	0.834	0.572	3.83717e-179	5	Hnrnpa1
Atp5g2	3.03704e-183	0.426542	0.923	0.853	4.65275e-179	5	Atp5g2
Cenpx	3.42819e-182	0.530503	0.745	0.45	5.25199e-178	5	Cenpx
Actb1	6.44572e-182	0.404317	0.998	0.988	9.87485e-178	5	Actb
Suv39h1	3.1388e-180	0.250786	0.277	0.046	4.80865e-176	5	Suv39h1
Wee1	2.73952e-178	0.30759	0.251	0.035	4.19694e-174	5	Wee1
Actg11	2.81981e-178	0.434827	0.974	0.919	4.31995e-174	5	Actg1
Dynlt1f	9.04676e-178	0.307342	0.414	0.114	1.38596e-173	5	Dynlt1f
Rhoa	1.65751e-176	0.376462	0.933	0.897	2.5393e-172	5	Rhoa
Snrpb	1.27526e-173	0.46553	0.833	0.644	1.9537e-169	5	Snrpb
Anapc5	7.87715e-171	0.468987	0.71	0.393	1.20678e-166	5	Anapc5
Nudc	8.74772e-170	0.48513	0.758	0.487	1.34015e-165	5	Nudc
Pfn11	4.60829e-168	0.407701	0.948	0.921	7.05989e-164	5	Pfn1
Atp5o.1	5.58489e-168	0.503062	0.787	0.53	8.55605e-164	5	Atp5o.1
Nap1l11	3.30553e-166	0.519247	0.725	0.415	5.06407e-162	5	Nap1l1
Topbp1	1.87676e-165	0.379279	0.38	0.102	2.8752e-161	5	Topbp1
Myef2	2.79578e-164	0.322695	0.358	0.09	4.28313e-160	5	Myef2
Alyref	2.56293e-161	0.462416	0.624	0.308	3.92641e-157	5	Alyref
Ndufb11	6.88101e-160	0.466742	0.827	0.62	1.05417e-155	5	Ndufb11
Sumo21	4.68787e-159	0.460309	0.85	0.723	7.18182e-155	5	Sumo2
Milr1	8.22869e-159	0.412018	0.511	0.192	1.26064e-154	5	Milr1
Hist1h4i	9.89166e-159	0.318386	0.39	0.112	1.5154e-154	5	Hist1h4i
Rpl41	2.18233e-158	0.369286	0.972	0.949	3.34332e-154	5	Rpl41
Serf21	2.94141e-158	0.394881	0.944	0.9	4.50624e-154	5	Serf2
Cep57l1	1.68844e-157	0.273718	0.295	0.062	2.58668e-153	5	Cep57l1
Mcm7	1.90833e-156	0.304496	0.325	0.076	2.92355e-152	5	Mcm7
Nudt4	3.54166e-153	0.439987	0.622	0.295	5.42583e-149	5	Nudt4
Ptms	7.93322e-152	0.449647	0.895	0.799	1.21537e-147	5	Ptms
Capg1	2.74715e-151	0.475463	0.596	0.268	4.20864e-147	5	Capg
Ssna1	1.40774e-149	0.421255	0.59	0.273	2.15666e-145	5	Ssna1
Lig1	2.27343e-149	0.456724	0.311	0.078	3.4829e-145	5	Lig1
Rbl1	7.18709e-148	0.311727	0.318	0.077	1.10106e-143	5	Rbl1
Glipr11	1.17129e-147	0.380585	0.435	0.147	1.79441e-143	5	Glipr1
Lsm4	2.55352e-147	0.459021	0.665	0.358	3.91199e-143	5	Lsm4
Exosc8	4.762e-146	0.396648	0.596	0.274	7.29539e-142	5	Exosc8
Elob	8.43659e-146	0.478404	0.84	0.677	1.29249e-141	5	Elob
Tubb2a	1.85604e-143	0.443449	0.602	0.289	2.84346e-139	5	Tubb2a
Ctsc1	6.77125e-143	0.420113	0.887	0.834	1.03736e-138	5	Ctsc
Ddah2	3.8377e-142	0.422715	0.604	0.287	5.87936e-138	5	Ddah2
Fundc2	2.40299e-139	0.399253	0.591	0.275	3.68138e-135	5	Fundc2
Cbfb	1.28197e-136	0.346057	0.522	0.218	1.96398e-132	5	Cbfb
Srsf3	2.01553e-136	0.422189	0.864	0.739	3.0878e-132	5	Srsf3
Igfbp4	1.61845e-135	0.379196	0.475	0.184	2.47946e-131	5	Igfbp4
Hist1h1c	6.95848e-135	0.504388	0.615	0.301	1.06604e-130	5	Hist1h1c
Atp5j	5.10889e-132	0.413689	0.838	0.716	7.82682e-128	5	Atp5j
Dck	1.62436e-131	0.287644	0.284	0.068	2.48851e-127	5	Dck
Uqcr10	2.34524e-131	0.453168	0.748	0.495	3.59291e-127	5	Uqcr10
Rbbp7	5.74495e-131	0.426262	0.586	0.286	8.80127e-127	5	Rbbp7
Gnas	6.57966e-131	0.35014	0.938	0.899	1.008e-126	5	Gnas
Hsp90b1	1.44915e-130	0.371999	0.941	0.929	2.22009e-126	5	Hsp90b1
Tipin	2.58629e-130	0.313806	0.325	0.091	3.96219e-126	5	Tipin
Fam111a	9.14003e-130	0.437111	0.612	0.307	1.40025e-125	5	Fam111a
Apobec3	1.07131e-129	0.438778	0.743	0.483	1.64124e-125	5	Apobec3
Lin9	1.07263e-129	0.293349	0.362	0.113	1.64327e-125	5	Lin9
Fzr1	1.89249e-129	0.318043	0.442	0.165	2.8993e-125	5	Fzr1
Ppib	2.27763e-128	0.321277	0.915	0.875	3.48933e-124	5	Ppib
Kmt5a	3.87302e-128	0.343643	0.543	0.243	5.93346e-124	5	Kmt5a
Haus3	8.76053e-128	0.28145	0.322	0.091	1.34211e-123	5	Haus3
Rps21	9.75666e-128	0.322859	0.955	0.943	1.49472e-123	5	Rps2
Ndufa4	1.61272e-127	0.41271	0.844	0.713	2.47068e-123	5	Ndufa4
Cox8a	4.60373e-127	0.376708	0.925	0.866	7.05292e-123	5	Cox8a
Hnrnpa2b11	9.92602e-125	0.356041	0.929	0.864	1.52067e-120	5	Hnrnpa2b1
Ptgr1	1.06381e-124	0.268892	0.301	0.08	1.62976e-120	5	Ptgr1
Brip1os	2.26528e-123	0.293215	0.458	0.182	3.47041e-119	5	Brip1os
Haus8	9.24518e-122	0.262034	0.335	0.103	1.41636e-117	5	Haus8
Dtymk	2.14964e-121	0.317088	0.432	0.165	3.29325e-117	5	Dtymk
Vars	3.72249e-120	0.312109	0.508	0.222	5.70286e-116	5	Vars
Rplp01	9.72746e-120	0.298216	0.99	0.962	1.49025e-115	5	Rplp0
Orc6	2.28087e-118	0.260153	0.284	0.075	3.4943e-114	5	Orc6
Hp1bp3	2.29339e-118	0.443933	0.774	0.552	3.51347e-114	5	Hp1bp3
Ssr4	3.0518e-117	0.318484	0.921	0.879	4.67535e-113	5	Ssr4
Lsm3	6.01289e-117	0.317044	0.54	0.252	9.21174e-113	5	Lsm3
Dnmt1	7.49619e-117	0.317483	0.363	0.123	1.14842e-112	5	Dnmt1
Ubl4a	1.32619e-116	0.310171	0.43	0.168	2.03172e-112	5	Ubl4a
Ubald2	3.81019e-115	0.384742	0.646	0.368	5.83721e-111	5	Ubald2
Prelid1	6.67403e-115	0.409553	0.697	0.439	1.02246e-110	5	Prelid1
Trappc1	1.71872e-114	0.37634	0.599	0.317	2.63307e-110	5	Trappc1
Myl61	3.36329e-113	0.376439	0.916	0.832	5.15255e-109	5	Myl6
Terf1	5.55428e-113	0.327577	0.426	0.168	8.50915e-109	5	Terf1
Ilf2	1.09868e-112	0.296508	0.52	0.24	1.68318e-108	5	Ilf2
Akr1b3	1.80664e-112	0.405555	0.709	0.46	2.76777e-108	5	Akr1b3
Hat1	3.111e-112	0.333162	0.424	0.168	4.76606e-108	5	Hat1
Mrpl331	5.87678e-111	0.385372	0.648	0.363	9.00323e-107	5	Mrpl33
Cox5b1	9.74121e-111	0.382654	0.83	0.66	1.49235e-106	5	Cox5b
Atp5j2	2.57786e-110	0.395343	0.828	0.681	3.94928e-106	5	Atp5j2
Snrpe1	2.85179e-110	0.393204	0.771	0.542	4.36894e-106	5	Snrpe
Cox7a2	1.12321e-109	0.390231	0.806	0.632	1.72076e-105	5	Cox7a2
Hnrnpab	5.71394e-109	0.428361	0.708	0.462	8.75376e-105	5	Hnrnpab
Ranbp1	8.64565e-109	0.446061	0.656	0.41	1.32451e-104	5	Ranbp1
H3f3b	1.53128e-108	0.369619	0.954	0.945	2.34592e-104	5	H3f3b
Rps191	1.75233e-108	0.278896	0.977	0.955	2.68457e-104	5	Rps19
Sap301	3.03066e-107	0.260111	0.435	0.181	4.64296e-103	5	Sap30
Arhgdib1	7.3094e-107	0.381744	0.887	0.814	1.1198e-102	5	Arhgdib
Maz	2.14146e-106	0.340992	0.609	0.331	3.28071e-102	5	Maz
Smchd1	3.3924e-106	0.43118	0.726	0.495	5.19716e-102	5	Smchd1
Atp5b	4.28484e-104	0.36033	0.851	0.729	6.56438e-100	5	Atp5b
Hpf1	5.81331e-104	0.358894	0.595	0.321	8.90599e-100	5	Hpf1
Cox6a1	2.08161e-102	0.396132	0.804	0.614	3.18902e-98	5	Cox6a1
Hnrnpu	4.54329e-102	0.387985	0.876	0.766	6.96032e-98	5	Hnrnpu
Prdx11	7.38953e-102	0.381827	0.857	0.735	1.13208e-97	5	Prdx1
Impdh2	1.04175e-101	0.317065	0.529	0.261	1.59596e-97	5	Impdh2
Sptssa	3.53589e-99	0.370268	0.779	0.561	5.41699e-95	5	Sptssa
Rps52	2.76492e-98	0.264953	0.982	0.958	4.23586e-94	5	Rps5
Calm11	2.7745e-98	0.357986	0.901	0.799	4.25054e-94	5	Calm1
Tfdp1	4.74143e-98	0.292493	0.29	0.094	7.26387e-94	5	Tfdp1
Nudt21	1.70745e-97	0.28781	0.509	0.249	2.61581e-93	5	Nudt21
Ssrp1	1.81446e-97	0.361023	0.554	0.294	2.77975e-93	5	Ssrp1
Slfn21	3.42513e-97	0.291662	0.566	0.298	5.2473e-93	5	Slfn2
Naaa	3.3557e-96	0.333835	0.576	0.309	5.14093e-92	5	Naaa
Srrt	5.64081e-96	0.309845	0.52	0.259	8.64171e-92	5	Srrt
Thoc7	1.27076e-95	0.322593	0.564	0.299	1.94681e-91	5	Thoc7
Rps262	2.87572e-95	0.312838	0.955	0.924	4.4056e-91	5	Rps26
Swi5	4.37075e-95	0.375589	0.756	0.554	6.69599e-91	5	Swi5
Sec11c	4.41403e-95	0.340557	0.851	0.75	6.7623e-91	5	Sec11c
Smc3	8.31353e-94	0.380692	0.625	0.362	1.27363e-89	5	Smc3
Lsm6	2.08144e-93	0.372402	0.678	0.436	3.18877e-89	5	Lsm6
H2-Q4	6.2581e-93	0.250452	0.46	0.215	9.58741e-89	5	H2-Q4
Mrpl18	1.50621e-92	0.33835	0.604	0.344	2.30751e-88	5	Mrpl18
Ap2s1	2.17704e-91	0.341873	0.705	0.461	3.33523e-87	5	Ap2s1
Cox20	2.62272e-91	0.301066	0.53	0.274	4.01801e-87	5	Cox20
Commd1	2.48357e-90	0.319443	0.58	0.322	3.80482e-86	5	Commd1
Brd8	3.65541e-90	0.342194	0.562	0.308	5.60009e-86	5	Brd8
Cox7c	1.32094e-89	0.332822	0.878	0.789	2.02368e-85	5	Cox7c
Ndufa3	1.6435e-89	0.364663	0.726	0.492	2.51785e-85	5	Ndufa3
Lcorl1	2.08894e-89	0.324769	0.507	0.256	3.20026e-85	5	Lcorl
Pcbd2	1.03496e-88	0.296228	0.426	0.193	1.58555e-84	5	Pcbd2
Cox6c1	3.59344e-87	0.347478	0.852	0.715	5.50516e-83	5	Cox6c
Cox4i1	1.16284e-86	0.275029	0.94	0.913	1.78147e-82	5	Cox4i1
Smdt11	1.39448e-86	0.356269	0.793	0.593	2.13634e-82	5	Smdt1
Dpy30	1.11649e-85	0.282892	0.502	0.257	1.71047e-81	5	Dpy30
Pkm	4.50176e-85	0.361542	0.818	0.668	6.89669e-81	5	Pkm
Fam96a	7.28519e-85	0.341547	0.639	0.401	1.11609e-80	5	Fam96a
Nsmce1	3.09676e-84	0.271757	0.467	0.23	4.74423e-80	5	Nsmce1
Snrpf	5.62784e-84	0.327265	0.697	0.459	8.62185e-80	5	Snrpf
Med30	2.35238e-83	0.296072	0.525	0.28	3.60385e-79	5	Med30
Tma71	5.76245e-83	0.355147	0.819	0.656	8.82807e-79	5	Tma7
Cenpb	1.5227e-82	0.313419	0.564	0.317	2.33278e-78	5	Cenpb
Atp5f1	1.79871e-82	0.321117	0.857	0.745	2.75562e-78	5	Atp5f1
Raly	7.36297e-82	0.345503	0.695	0.475	1.12801e-77	5	Raly
Ppp1cc	1.24609e-81	0.322151	0.743	0.522	1.90901e-77	5	Ppp1cc
Snrpc	2.95163e-81	0.296069	0.598	0.349	4.5219e-77	5	Snrpc
Rad50	3.32802e-81	0.283998	0.498	0.26	5.09853e-77	5	Rad50
Ddost	5.10836e-81	0.310224	0.796	0.655	7.82601e-77	5	Ddost
Cxcl161	1.00991e-80	0.357343	0.703	0.468	1.54718e-76	5	Cxcl16
Ndufa2	1.36547e-80	0.340648	0.802	0.64	2.0919e-76	5	Ndufa2
Suz12	1.37505e-80	0.279144	0.519	0.278	2.10657e-76	5	Suz12
Vrk1	1.07203e-79	0.302031	0.516	0.277	1.64235e-75	5	Vrk1
Ssr2	2.04599e-79	0.31234	0.73	0.518	3.13446e-75	5	Ssr2
Ccdc88a1	2.85252e-79	0.286271	0.558	0.314	4.37006e-75	5	Ccdc88a
Dctpp1	4.36129e-79	0.318458	0.551	0.317	6.6815e-75	5	Dctpp1
Dazap1	1.83862e-78	0.269017	0.531	0.292	2.81677e-74	5	Dazap1
Med21	3.45303e-78	0.424016	0.491	0.267	5.29005e-74	5	Med21
Smc6	4.07307e-78	0.316029	0.593	0.353	6.23994e-74	5	Smc6
Dynll2	6.12939e-78	0.314981	0.608	0.366	9.39022e-74	5	Dynll2
Snrpd2	6.55702e-78	0.331755	0.711	0.489	1.00454e-73	5	Snrpd2
Snrpg	1.39937e-77	0.333388	0.663	0.428	2.14383e-73	5	Snrpg
Ptpa	2.7007e-77	0.258785	0.537	0.298	4.13747e-73	5	Ptpa
Dynll11	3.23149e-77	0.359971	0.781	0.632	4.95064e-73	5	Dynll1
Erh	3.91871e-77	0.267328	0.494	0.261	6.00347e-73	5	Erh
Anapc11	6.09692e-77	0.326422	0.651	0.418	9.34048e-73	5	Anapc11
Cox6b11	9.10832e-77	0.309144	0.849	0.735	1.39539e-72	5	Cox6b1
Sf3b5	1.01117e-76	0.313299	0.678	0.443	1.54911e-72	5	Sf3b5
Eif5a1	1.10875e-76	0.346221	0.827	0.717	1.6986e-72	5	Eif5a
Hacd4	3.28627e-76	0.309995	0.585	0.345	5.03456e-72	5	Hacd4
Atp5d	5.85455e-75	0.333262	0.847	0.709	8.96918e-71	5	Atp5d
Srsf7	8.55052e-75	0.298598	0.657	0.418	1.30994e-70	5	Srsf7
Ctcf	1.78055e-74	0.319989	0.66	0.44	2.7278e-70	5	Ctcf
Atp5k	2.14232e-74	0.337967	0.661	0.438	3.28203e-70	5	Atp5k
Tmem176b	3.49995e-74	0.309474	0.908	0.843	5.36193e-70	5	Tmem176b
U2af1	5.3053e-74	0.289018	0.648	0.412	8.12771e-70	5	U2af1
Rpl22l1	7.76002e-74	0.327297	0.845	0.705	1.18884e-69	5	Rpl22l1
Eri1	7.97366e-74	0.253687	0.4	0.189	1.22156e-69	5	Eri1
Eny2	1.13104e-73	0.251465	0.482	0.256	1.73275e-69	5	Eny2
Atp5g3	1.7304e-73	0.318109	0.648	0.419	2.65097e-69	5	Atp5g3
Pcna	1.19068e-72	0.28511	0.304	0.124	1.82413e-68	5	Pcna
Gnb2	2.68464e-72	0.273784	0.872	0.82	4.11288e-68	5	Gnb2
S100a131	3.01299e-72	0.319995	0.603	0.372	4.61589e-68	5	S100a13
Tcp1	9.82814e-72	0.288861	0.676	0.441	1.50567e-67	5	Tcp1
Mdh1	1.43542e-71	0.314554	0.769	0.575	2.19906e-67	5	Mdh1
Ndufc1	3.54059e-71	0.324211	0.63	0.403	5.42419e-67	5	Ndufc1
Cep192	5.94752e-70	0.26111	0.468	0.249	9.1116e-66	5	Cep192
Ppp1ca	1.22127e-69	0.292239	0.829	0.715	1.87098e-65	5	Ppp1ca
Cox5a1	1.88856e-69	0.324955	0.779	0.616	2.89327e-65	5	Cox5a
Gm100761	2.9227e-69	0.30787	0.865	0.753	4.47758e-65	5	Gm10076
Bax	5.46925e-69	0.327664	0.749	0.564	8.37889e-65	5	Bax
Calm21	9.26165e-69	0.267357	0.921	0.891	1.41888e-64	5	Calm2
Tkt1	1.86346e-67	0.302009	0.781	0.583	2.85482e-63	5	Tkt
Spop	1.34796e-66	0.281912	0.644	0.42	2.06508e-62	5	Spop
S100a9	1.35423e-66	0.334266	0.343	0.155	2.07467e-62	5	S100a9
Mrpl42	1.91411e-66	0.264499	0.611	0.385	2.93241e-62	5	Mrpl42
Ywhae	3.1656e-66	0.282204	0.872	0.802	4.84971e-62	5	Ywhae
Rps17	3.20759e-66	0.251679	0.921	0.873	4.91402e-62	5	Rps17
Cnih4	3.42697e-66	0.294482	0.701	0.487	5.25011e-62	5	Cnih4
Cbx1	4.80484e-65	0.285337	0.66	0.44	7.36102e-61	5	Cbx1
Pea15a	5.50218e-65	0.260053	0.647	0.422	8.42933e-61	5	Pea15a
Gusb	1.94886e-64	0.280872	0.819	0.713	2.98566e-60	5	Gusb
Rtcb	2.45489e-64	0.3023	0.672	0.461	3.76089e-60	5	Rtcb
Bag1	2.95237e-64	0.320637	0.777	0.598	4.52303e-60	5	Bag1
Vdac3	2.75589e-63	0.311353	0.681	0.48	4.22202e-59	5	Vdac3
Atox11	1.64106e-62	0.305866	0.852	0.758	2.5141e-58	5	Atox1
Supt16	4.16649e-62	0.276979	0.601	0.384	6.38307e-58	5	Supt16
Set	5.34145e-62	0.331923	0.784	0.632	8.18311e-58	5	Set
Pkig	2.38368e-61	0.293767	0.779	0.605	3.65179e-57	5	Pkig
Rac21	5.91052e-61	0.270508	0.79	0.607	9.05491e-57	5	Rac2
Ccl121	8.05871e-61	0.352032	0.616	0.399	1.23459e-56	5	Ccl12
Snx31	2.43356e-60	0.288765	0.777	0.614	3.72821e-56	5	Snx3
Nme1	9.4034e-60	0.255172	0.596	0.383	1.4406e-55	5	Nme1
Uqcrq	1.08811e-59	0.312193	0.752	0.581	1.66699e-55	5	Uqcrq
Atp5e1	1.11256e-59	0.300547	0.874	0.794	1.70445e-55	5	Atp5e
G3bp1	2.95061e-59	0.250877	0.677	0.468	4.52033e-55	5	G3bp1
Pgp	4.43335e-59	0.256066	0.492	0.287	6.79189e-55	5	Pgp
Ndufa12	5.97183e-59	0.270644	0.591	0.378	9.14885e-55	5	Ndufa12
Ywhaq	6.10397e-59	0.259882	0.68	0.474	9.35128e-55	5	Ywhaq
Ndufb7	1.07211e-58	0.278678	0.731	0.539	1.64247e-54	5	Ndufb7
2020-09-07	1.46797e-58	0.297766	0.797	0.64	2.24893e-54	5	2020-09-07
Slbp	1.525e-58	0.357625	0.489	0.331	2.33629e-54	5	Slbp
Arsb	1.67287e-58	0.295426	0.717	0.522	2.56283e-54	5	Arsb
Cmpk11	3.95387e-58	0.276082	0.673	0.471	6.05733e-54	5	Cmpk1
Tnf1	9.4131e-58	0.350849	0.451	0.253	1.44209e-53	5	Tnf
Reep5	1.43443e-57	0.271292	0.857	0.759	2.19755e-53	5	Reep5
Ndufb8	5.20035e-57	0.291827	0.751	0.585	7.96694e-53	5	Ndufb8
Ndufa1	1.56555e-56	0.265877	0.667	0.46	2.39842e-52	5	Ndufa1
Rbbp4	1.7963e-56	0.312053	0.639	0.472	2.75193e-52	5	Rbbp4
Tuba1a	2.16434e-56	0.28685	0.661	0.456	3.31577e-52	5	Tuba1a
Psmb2	1.94633e-55	0.288382	0.713	0.531	2.98178e-51	5	Psmb2
Psma1	3.76514e-55	0.287203	0.719	0.533	5.76819e-51	5	Psma1
Aes1	1.17322e-54	0.278742	0.763	0.597	1.79737e-50	5	Aes
Tmem176a1	1.20999e-54	0.290792	0.853	0.736	1.85371e-50	5	Tmem176a
Minos1	1.39836e-54	0.290975	0.72	0.542	2.14228e-50	5	Minos1
Cwc15	5.80185e-54	0.275006	0.691	0.501	8.88844e-50	5	Cwc15
Tpr	1.33258e-53	0.277963	0.797	0.646	2.04152e-49	5	Tpr
Atp5h1	6.95784e-53	0.265557	0.857	0.774	1.06594e-48	5	Atp5h
Psmb6	1.85768e-52	0.274488	0.744	0.585	2.84597e-48	5	Psmb6
Nedd8	1.98563e-52	0.278101	0.801	0.672	3.04198e-48	5	Nedd8
Psmb4	7.51708e-52	0.284129	0.724	0.549	1.15162e-47	5	Psmb4
Ccl21	8.28323e-52	0.451296	0.373	0.197	1.26899e-47	5	Ccl2
Ndufa5	2.19574e-51	0.252707	0.53	0.335	3.36387e-47	5	Ndufa5
Ubl5	1.22259e-50	0.284456	0.82	0.687	1.87301e-46	5	Ubl5
Ndufs5	4.08765e-50	0.257913	0.682	0.492	6.26227e-46	5	Ndufs5
Rheb	1.04854e-49	0.250375	0.675	0.484	1.60636e-45	5	Rheb
Mrps14	1.38339e-49	0.263697	0.62	0.428	2.11935e-45	5	Mrps14
Kdelr2	6.7685e-49	0.255969	0.59	0.399	1.03693e-44	5	Kdelr2
2010107E04Rik	1.93717e-47	0.262452	0.733	0.555	2.96775e-43	5	2010107E04Rik
Ap2m1	1.02353e-46	0.266308	0.678	0.499	1.56805e-42	5	Ap2m1
Smarca5	5.99752e-46	0.264221	0.692	0.512	9.1882e-42	5	Smarca5
Hnrnpd	1.03502e-43	0.253268	0.73	0.56	1.58565e-39	5	Hnrnpd
Psmc3	2.60433e-43	0.262644	0.684	0.514	3.98983e-39	5	Psmc3
Srsf2	6.36024e-39	0.255464	0.755	0.623	9.74388e-35	5	Srsf2
1810037I17Rik	3.06254e-37	0.283977	0.631	0.476	4.69181e-33	5	1810037I17Rik
Il1a1	1.63037e-21	0.333489	0.606	0.503	2.49772e-17	5	Il1a
Ccl41	5.5404e-16	0.267182	0.815	0.74	8.4879e-12	5	Ccl4
