# Supplementary material for: A MAC2-positive progenitor-like microglial population is resistant to CSF1R inhibition in adult mouse brain
Source: eLife. 2020 Oct 15;9:e51796. doi: 10.7554/eLife.51796 (PMC7591254; doi:10.7554/eLife.51796)
Supplement: Figure 4—source data 1. [file elife-51796-fig4-data1.xlsx]

## Sheet: Cluster_D0_vs_Ctrl_markers
	p_val	avg_logFC	pct.1	pct.2	p_val_adj
S100a9	0	1.67173	0.271	0.025	0
Il1b	0	1.42125	0.425	0.116	0
S100a8	0	1.3725	0.204	0.018	0
Ifi27l2a	0	1.26912	0.511	0.122	0
Stmn1	0	1.04188	0.382	0.192	0
Ccl4	0	0.893456	0.84	0.648	0
Cd52	0	0.885847	0.875	0.721	0
Rpsa	0	0.837595	0.981	0.94	0
Cd83	0	0.79726	0.771	0.57	0
Cd74	0	0.784954	0.473	0.194	0
Vim	0	0.770386	0.25	0.047	0
Ccl3	0	0.766395	0.781	0.569	0
Arl5c	0	0.730711	0.464	0.191	0
Fxyd5	0	0.703813	0.42	0.092	0
Gm10076	0	0.692499	0.861	0.669	0
Rps2	0	0.688036	0.963	0.932	0
Rpl32	0	0.681212	0.983	0.954	0
Rps5	0	0.661866	0.977	0.946	0
Rpl10a	0	0.649694	0.975	0.938	0
Rps26	0	0.648976	0.955	0.9	0
H2afz	0	0.648101	0.857	0.817	0
Rplp0	0	0.644618	0.98	0.952	0
Emp3	0	0.629619	0.466	0.218	0
Rpl41	0	0.611947	0.966	0.937	0
Mki67	0	0.598481	0.128	0.004	0
H2-D1	0	0.589971	0.946	0.866	0
Lyz2	0	0.58675	0.925	0.755	0
Fth1	0	0.581583	0.995	0.978	0
Tubb5	0	0.578593	0.76	0.691	0
Rps19	0	0.562182	0.975	0.943	0
Rack1	0	0.561609	0.961	0.92	0
Rps24	0	0.560046	0.99	0.968	0
Rps16	0	0.558081	0.983	0.959	0
Tspo	0	0.55748	0.692	0.485	0
Rps20	0	0.556632	0.984	0.957	0
Bcl2a1b	0	0.552264	0.783	0.655	0
Rps8	0	0.551368	0.981	0.96	0
Rps27a	0	0.546638	0.987	0.962	0
Ube2c	0	0.542295	0.151	0.002	0
Rps12	0	0.542153	0.984	0.962	0
Rpl15	0	0.536481	0.968	0.939	0
Rpl19	0	0.525128	0.984	0.961	0
Ramp1	0	0.513794	0.555	0.276	0
Rpl22l1	0	0.513352	0.793	0.636	0
Rpl24	0	0.512545	0.966	0.926	0
Rps7	0	0.512014	0.976	0.947	0
Rpl7a	0	0.503141	0.961	0.927	0
Rpl35	0	0.502685	0.94	0.879	0
Rpl13	0	0.501967	0.99	0.971	0
Rps18	0	0.501862	0.969	0.938	0
B2m	0	0.498467	0.979	0.96	0
Rpl36	0	0.492983	0.96	0.922	0
Rpl23	0	0.487771	0.986	0.963	0
Rps10	0	0.483082	0.986	0.961	0
Rpl18	0	0.48065	0.973	0.948	0
Rpl12	0	0.476311	0.969	0.939	0
Rpl9	0	0.474867	0.98	0.954	0
Rps15a	0	0.472411	0.978	0.953	0
Birc5	0	0.468256	0.127	0.003	0
Sh3bgrl3	0	0.467848	0.939	0.903	0
Npm1	0	0.464206	0.906	0.834	0
Rpl28	0	0.46365	0.974	0.949	0
Capg	0	0.453408	0.4	0.17	0
Rpl8	0	0.452973	0.972	0.947	0
Rps25	0	0.450936	0.961	0.93	0
Rpl23a	0	0.450701	0.945	0.891	0
Rplp2	0	0.448636	0.973	0.947	0
Gatm	0	0.445909	0.652	0.51	0
Rpl11	0	0.445889	0.98	0.957	0
Atp5g2	0	0.443261	0.899	0.833	0
Eif3f	0	0.442322	0.877	0.78	0
Rps11	0	0.43789	0.982	0.962	0
Rpl29	0	0.436153	0.95	0.92	0
Serf2	0	0.432961	0.927	0.893	0
Rpl31	0	0.432459	0.872	0.759	0
Prdx4	0	0.431154	0.513	0.322	0
Rpl27a	0	0.428354	0.987	0.967	0
Rpl3	0	0.425825	0.975	0.947	0
Rpl14	0	0.424457	0.958	0.92	0
Fau	0	0.419598	0.99	0.97	0
Rps15	0	0.41886	0.958	0.927	0
Rpl39	0	0.418786	0.979	0.953	0
Uba52	0	0.418257	0.662	0.431	0
Rps4x	0	0.417864	0.982	0.961	0
Ssr4	0	0.413637	0.914	0.867	0
Rps17	0	0.409964	0.914	0.847	0
Rpl6	0	0.409563	0.98	0.959	0
Rps13	0	0.403756	0.974	0.953	0
Rpl18a	0	0.403143	0.985	0.962	0
Rpl22	0	0.403132	0.959	0.924	0
Rps14	0	0.401884	0.981	0.957	0
Eef1b2	0	0.40108	0.953	0.909	0
Rpl37a	0	0.400028	0.979	0.957	0
Rpl38	0	0.398645	0.957	0.91	0
Myl6	0	0.3951	0.876	0.817	0
H2-K1	0	0.392972	0.909	0.838	0
Ybx1	0	0.391687	0.844	0.793	0
Rpl37	0	0.380036	0.977	0.953	0
Rps9	0	0.37526	0.978	0.961	0
Cox4i1	0	0.375142	0.94	0.902	0
Naca	0	0.367394	0.942	0.901	0
Rps28	0	0.36513	0.935	0.883	0
Rpl36a	0	0.364392	0.932	0.873	0
Cox8a	0	0.36276	0.904	0.852	0
Rpl7	0	0.358118	0.968	0.945	0
Rpl5	0	0.357425	0.959	0.934	0
Uqcrh	0	0.350134	0.873	0.79	0
Ctsh	0	0.346797	0.95	0.93	0
Rpl10	0	0.343482	0.976	0.955	0
Tmsb4x	0	0.34334	0.996	0.992	0
Rpl34	0	0.342865	0.972	0.951	0
Rpl26	0	0.341793	0.979	0.957	0
Gnas	0	0.341613	0.927	0.902	0
Rps3a1	0	0.341393	0.983	0.961	0
Rpl21	0	0.33539	0.982	0.965	0
Rps6	0	0.315439	0.957	0.929	0
Npc2	0	0.314178	0.957	0.935	0
Rps3	0	0.313983	0.979	0.958	0
Rpl17	0	0.309384	0.974	0.952	0
Rpl35a	0	0.301036	0.984	0.961	0
Eef1a1	0	0.298828	0.99	0.974	0
Eef2	0	0.283965	0.911	0.884	0
Rps21	0	0.283434	0.979	0.957	0
Ccnb2	0	0.27206	0.116	0.002	0
Rpl30	0	0.263167	0.982	0.963	0
Rps23	0	0.256389	0.98	0.958	0
Rps29	0	0.2501	0.989	0.973	0
Mtdh	0	-0.287803	0.904	0.934	0
Basp1	0	-0.303397	0.899	0.934	0
Serinc3	0	-0.307805	0.944	0.96	0
Siglech	0	-0.315902	0.876	0.932	0
Sirpa	0	-0.317735	0.889	0.932	0
Lpcat2	0	-0.326181	0.902	0.936	0
F11r	0	-0.336116	0.799	0.879	0
Abi3	0	-0.341151	0.751	0.851	0
Son	0	-0.342165	0.868	0.918	0
Qk	0	-0.345801	0.906	0.954	0
Cd37	0	-0.352465	0.785	0.873	0
Golm1	0	-0.352532	0.796	0.876	0
St3gal6	0	-0.361758	0.689	0.825	0
Sft2d1	0	-0.367818	0.63	0.777	0
Mbnl1	0	-0.36856	0.822	0.905	0
Khdrbs3	0	-0.369785	0.187	0.423	0
Mef2c	0	-0.371502	0.888	0.947	0
Slco2b1	0	-0.372664	0.711	0.835	0
Rsrp1	0	-0.384631	0.828	0.901	0
Sall1	0	-0.384988	0.597	0.75	0
Plxdc2	0	-0.390479	0.819	0.9	0
Dusp7	0	-0.3918	0.244	0.496	0
Cyth4	0	-0.393249	0.876	0.934	0
Mef2a	0	-0.404353	0.867	0.928	0
Vsir	0	-0.411812	0.898	0.939	0
Fscn1	0	-0.412653	0.572	0.746	0
Nrip1	0	-0.413355	0.665	0.798	0
Apbb1ip	0	-0.416577	0.814	0.907	0
Adgrg1	0	-0.434328	0.582	0.774	0
Pag1	0	-0.44452	0.689	0.835	0
Pnp	0	-0.446428	0.692	0.84	0
Srgap2	0	-0.449793	0.791	0.895	0
Gpr34	0	-0.450825	0.893	0.934	0
Elmo1	0	-0.454001	0.656	0.821	0
Rnase4	0	-0.463678	0.811	0.897	0
Zfhx3	0	-0.463792	0.787	0.887	0
Stab1	0	-0.472223	0.477	0.688	0
Gm47283	0	-0.47263	0.401	0.615	0
Lrba	0	-0.484895	0.378	0.632	0
Nav3	0	-0.48594	0.442	0.666	0
Ptgs1	0	-0.487458	0.744	0.888	0
Txnip	0	-0.487941	0.732	0.884	0
Csmd3	0	-0.488227	0.288	0.547	0
Cmtm6	0	-0.490037	0.767	0.892	0
Tgfbr1	0	-0.494985	0.867	0.942	0
Bank1	0	-0.49728	0.084	0.394	0
Rhob	0	-0.499602	0.87	0.934	0
Ccnd1	0	-0.503049	0.243	0.548	0
Fcrls	0	-0.517578	0.88	0.95	0
Dusp6	0	-0.518113	0.38	0.664	0
Hpgds	0	-0.524696	0.811	0.918	0
Numb	0	-0.52878	0.382	0.669	0
Malat1	0	-0.536515	0.975	0.989	0
Selplg	0	-0.538928	0.948	0.96	0
Arhgap5	0	-0.547597	0.815	0.914	0
Cx3cr1	0	-0.550861	0.932	0.972	0
Pmepa1	0	-0.571801	0.816	0.912	0
Fam102b	0	-0.586114	0.53	0.772	0
Crybb1	0	-0.615632	0.591	0.805	0
Maf	0	-0.634293	0.721	0.892	0
Slc2a5	0	-0.634701	0.488	0.776	0
Ecscr	0	-0.652118	0.539	0.814	0
Cd164	0	-0.69479	0.569	0.826	0
Tmem119	0	-0.720325	0.818	0.922	0
Sox4	0	-0.803121	0.379	0.67	0
P2ry12	0	-0.894216	0.873	0.946	0
P2ry13	0	-0.93742	0.614	0.878	0
Pabpc1	6.44261602176985e-321	0.317304	0.912	0.852	9.87008774535142e-317
Jmjd1c	2.06880107883105e-319	-0.400615	0.67	0.8	3.16940325276917e-315
Ifitm3	2.46430435358194e-315	0.577518	0.36	0.134	3.77531426968753e-311
Gna15	4.03267008969864e-315	-0.368402	0.569	0.741	6.17805057741832e-311
Csf1r	7.05796202738422e-314	-0.241962	0.955	0.977	0
Laptm5	1.24235702029073e-312	-0.208112	0.972	0.976	0
Adrb2	1.91023620208894e-312	-0.475861	0.469	0.694	2.92648e-308
mt-Nd4l	0	0.367573	0.781	0.629	2.32784e-304
Atp5e	5.92979e-308	0.339576	0.852	0.778	9.08443e-304
Fez2	4.92776e-307	-0.353772	0.505	0.689	7.54932e-303
Tpt1	5.75465e-307	0.229001	0.99	0.971	8.81612e-303
Cxcl16	1.06669e-306	0.478721	0.567	0.377	1.63417e-302
Foxn3	2.95411e-304	-0.376187	0.608	0.758	4.52569e-300
Usp2	8.76493e-302	-0.390889	0.389	0.598	1.34279e-297
3222401L13Rik	1.23232e-299	-0.342474	0.152	0.376	1.88792e-295
Ltc4s	1.64112e-299	-0.352238	0.774	0.882	2.5142e-295
Camk2n1	2.75011e-299	-0.394757	0.378	0.586	4.21317e-295
Arpc1b	4.06815e-298	0.296029	0.912	0.897	6.2324e-294
Cdca3	7.72329e-297	0.227738	0.107	0.002	1.18321e-292
Calm2	8.12798e-297	-0.26132	0.897	0.93	1.24521e-292
Frmd4a	1.12987e-294	-0.370488	0.747	0.857	1.73096e-290
Grap	6.97201e-292	-0.344227	0.293	0.504	1.06811e-287
Top2a	1.01984e-290	0.610155	0.114	0.005	1.5624e-286
Cxcl10	3.61017e-289	1.10431	0.246	0.066	5.53078e-285
Nav2	9.6119e-289	-0.402732	0.631	0.788	1.47254e-284
Mertk	3.02303e-288	-0.360589	0.671	0.807	4.63129e-284
Cdca8	1.89138e-287	0.32003	0.119	0.007	2.89759e-283
Nfkbia	5.7998e-287	0.537778	0.799	0.677	8.88529e-283
Csnk1e	8.53526e-286	-0.338267	0.658	0.778	1.3076e-281
Hmgb2	2.16074e-284	0.742567	0.575	0.409	3.31026e-280
Il6st	3.48165e-283	-0.35528	0.345	0.554	5.33389e-279
Gng5	1.82005e-282	0.304017	0.903	0.873	2.78832e-278
Ftl1	3.30168e-281	0.283373	0.988	0.98	5.05817e-277
Tmem100	1.72022e-280	-0.317576	0.189	0.405	2.63537e-276
Ccrl2	2.9045e-280	0.629783	0.646	0.443	4.4497e-276
Abhd12	1.31119e-279	-0.270499	0.866	0.913	2.00874e-275
Knstrn	4.84748e-279	0.191663	0.118	0.007	7.42634e-275
Gcnt1	2.27699e-278	-0.36051	0.338	0.547	3.48835e-274
St3gal5	2.41083e-278	-0.352051	0.476	0.653	3.6934e-274
Fus	1.20368e-277	-0.355417	0.772	0.862	1.84404e-273
Lgals3bp	1.8243e-277	0.414686	0.556	0.356	2.79483e-273
Hspe1	7.24803e-276	0.33006	0.825	0.733	1.1104e-271
Susd3	1.9087e-275	-0.329318	0.656	0.785	2.92412e-271
Tmem173	7.22776e-275	-0.337597	0.612	0.756	1.10729e-270
Atox1	3.17284e-274	0.338389	0.812	0.74	4.86078e-270
Inpp5d	2.67955e-273	-0.323255	0.762	0.857	4.10507e-269
Cd53	2.75123e-272	-0.26717	0.873	0.909	4.21489e-268
Mgll	4.46855e-272	-0.332363	0.239	0.458	6.84582e-268
Rnf13	1.45763e-271	-0.304747	0.726	0.824	2.2331e-267
Btf3	9.83295e-270	0.26331	0.876	0.858	1.50641e-265
Psap	2.22988e-269	0.256131	0.971	0.968	3.41617e-265
Tanc2	1.42313e-268	-0.360618	0.72	0.838	2.18024e-264
Gadd45b	6.72322e-266	0.662008	0.361	0.161	1.03e-261
Commd8	3.54156e-265	-0.310173	0.681	0.792	5.42567e-261
mt-Co1	1.48035e-263	0.237342	0.987	0.982	2.2679e-259
Mafb	3.64648e-263	-0.403679	0.86	0.919	5.58641e-259
Rapgef5	4.18842e-263	-0.379766	0.487	0.67	6.41666e-259
Cenpa	1.13159e-261	0.424891	0.182	0.041	1.73359e-257
Cyfip1	1.93137e-261	-0.277274	0.872	0.92	2.95886e-257
Cebpd	4.91051e-260	-0.371204	0.372	0.583	7.52291e-256
Hint1	1.8543e-259	0.316453	0.797	0.72	2.84079e-255
Lpl	4.4401e-259	0.299368	0.205	0.049	6.80223e-255
Pim1	1.45598e-258	0.580865	0.272	0.094	2.23056e-254
Whrn	3.99908e-257	-0.356932	0.24	0.454	6.1266e-253
Lair1	4.54915e-256	-0.297759	0.832	0.908	6.96929e-252
Tmem86a	3.63329e-255	-0.326767	0.639	0.778	5.56621e-251
Cdkn1a	3.53667e-252	0.525493	0.267	0.094	5.41818e-248
Atp5d	6.40204e-252	0.311532	0.78	0.679	9.80793e-248
Chst2	6.33196e-251	0.263437	0.169	0.033	9.70056e-247
Saraf	1.06185e-250	-0.266693	0.78	0.851	1.62675e-246
Cdk1	1.43992e-250	0.309226	0.129	0.016	2.20596e-246
Ivns1abp	8.98393e-250	-0.319318	0.768	0.865	1.37634e-245
Cst3	9.38158e-250	-0.303567	0.997	0.999	1.43726e-245
Eif3k	1.49372e-247	0.315775	0.783	0.661	2.28839e-243
Ifi204	2.94208e-246	0.280554	0.216	0.058	4.50726e-242
Oaz1	3.96538e-246	0.271241	0.919	0.906	6.07496e-242
Rrbp1	1.59245e-245	-0.272838	0.918	0.955	2.43963e-241
Pclaf	1.19554e-244	0.32453	0.106	0.007	1.83157e-240
Ski	2.103e-244	-0.319815	0.572	0.708	3.22179e-240
Gapdh	2.97152e-244	0.347203	0.904	0.893	4.55238e-240
Klhdc8b	2.056e-243	-0.261407	0.116	0.297	3.14979e-239
Racgap1	2.16318e-243	0.21651	0.11	0.008	3.31399e-239
Cst7	1.05774e-241	0.345764	0.231	0.071	1.62046e-237
Frmd4b	3.5449e-240	-0.348025	0.612	0.758	5.43078e-236
Cxxc5	6.26043e-240	-0.321837	0.505	0.666	9.59099e-236
Ifngr1	2.21225e-239	-0.208809	0.925	0.929	3.38916e-235
Snn	1.46215e-238	-0.295866	0.258	0.455	2.24002e-234
Slc7a8	3.43237e-238	-0.325539	0.496	0.656	5.25839e-234
Dock4	3.67612e-238	-0.348688	0.65	0.773	5.63182e-234
Ubash3b	6.70369e-238	-0.333433	0.384	0.559	1.027e-233
Ogfrl1	4.70238e-236	-0.317751	0.522	0.673	7.20405e-232
Slc25a3	7.3013e-236	0.26313	0.853	0.805	1.11856e-231
Cd72	5.24568e-235	0.27968	0.206	0.055	8.03638e-231
Ppia	4.58905e-234	0.315791	0.967	0.958	7.03042e-230
Pla2g15	5.22641e-234	-0.302127	0.618	0.752	8.00686e-230
Cox6c	2.95287e-232	0.304914	0.785	0.696	4.5238e-228
Tmed7	2.23708e-229	-0.284822	0.522	0.656	3.42721e-225
Sipa1	2.41786e-229	-0.315731	0.499	0.651	3.70416e-225
Lsp1	2.48519e-229	0.445839	0.542	0.338	3.80731e-225
Anp32b	2.28261e-228	0.378797	0.615	0.472	3.49696e-224
Tpst2	2.86284e-228	-0.297445	0.592	0.719	4.38587e-224
Sall3	3.7099e-228	-0.345412	0.235	0.421	5.68357e-224
Arhgdib	4.68746e-228	0.322041	0.85	0.811	7.18118e-224
Bcl2a1d	7.05664e-226	0.289075	0.218	0.065	1.08108e-221
Arhgap45	1.29592e-225	-0.310685	0.748	0.848	1.98536e-221
Gm31243	5.79633e-225	-0.170729	0.019	0.13	8.87998e-221
Ints6l	6.23244e-224	-0.350986	0.369	0.551	9.5481e-220
Etv5	1.35765e-223	-0.255502	0.139	0.308	2.07992e-219
Slfn2	6.54396e-222	0.366627	0.389	0.19	1.00253e-217
Mylip	1.21296e-221	-0.321373	0.584	0.731	1.85825e-217
Lmnb1	2.06777e-221	0.277517	0.204	0.062	3.16782e-217
Marcks	7.57933e-221	-0.2086	0.943	0.966	1.16115e-216
Slc1a3	1.14622e-219	-0.32249	0.381	0.582	1.75601e-215
Prkab1	4.66451e-219	-0.276758	0.184	0.364	7.14603e-215
Rhoh	9.01362e-219	-0.355316	0.653	0.782	1.38089e-214
Srsf5	2.90641e-217	-0.309605	0.632	0.756	4.45262e-213
Ppib	3.56072e-217	0.243032	0.906	0.886	5.45502e-213
Tmsb10	1.65506e-216	0.574796	0.581	0.51	2.53555e-212
Gpx1	1.76991e-216	0.348333	0.824	0.776	2.71151e-212
Axl	1.1073e-215	0.167521	0.16	0.035	1.69638e-211
Cebpb	1.62179e-215	0.463301	0.823	0.77	2.48458e-211
Cks1b	3.29577e-213	0.26305	0.15	0.033	5.04912e-209
Lyl1	1.41974e-212	-0.304509	0.388	0.562	2.17504e-208
Xist	3.21788e-212	-0.334654	0.898	0.924	4.92979e-208
Slc44a2	3.71541e-211	-0.305755	0.315	0.493	5.69201e-207
Sema4b	6.30545e-211	-0.220417	0.056	0.195	9.65996e-207
Myo1b	1.14194e-210	-0.28279	0.162	0.334	1.74946e-206
Tgfb1	1.17421e-208	-0.287093	0.79	0.853	1.79889e-204
Pnisr	1.93805e-208	-0.325909	0.655	0.776	2.9691e-204
Klf7	1.65249e-207	-0.314084	0.239	0.415	2.53161e-203
Retreg1	8.04154e-207	-0.274729	0.632	0.757	1.23196e-202
Sec61b	3.50506e-206	0.290715	0.75	0.658	5.36975e-202
Fchsd2	3.07995e-205	-0.35714	0.554	0.7	4.71849e-201
Tjp1	2.86703e-204	-0.301912	0.39	0.553	4.39229e-200
Scoc	7.73778e-203	-0.28158	0.795	0.866	1.18543e-198
Rtn1	1.51422e-202	-0.279098	0.268	0.434	2.31979e-198
Pde3b	3.22766e-202	-0.290512	0.66	0.776	4.94477e-198
Pik3cg	4.82673e-202	-0.29342	0.321	0.5	7.39455e-198
Rilpl2	4.8961e-201	0.299107	0.288	0.126	7.50083e-197
Arhgef40	6.12e-201	-0.303447	0.276	0.451	9.37583e-197
Eif3h	8.0681e-201	0.270094	0.802	0.716	1.23603e-196
Cables1	1.9695e-199	-0.288258	0.22	0.39	3.01727e-195
Ikzf1	2.23111e-199	-0.300483	0.568	0.697	3.41806e-195
Cenpf	2.47223e-199	0.388046	0.108	0.016	3.78746e-195
Zfp697	1.8413e-196	-0.209996	0.061	0.198	2.82087e-192
Tyrobp	2.60726e-196	0.190989	0.985	0.973	3.99433e-192
Rab3il1	5.91846e-196	-0.280573	0.6	0.729	9.06708e-192
Calm3	1.74053e-195	0.321959	0.542	0.387	2.66649e-191
Zmiz1	1.40116e-194	-0.286957	0.578	0.693	2.14658e-190
Camk1	1.10262e-193	-0.241606	0.808	0.877	1.68921e-189
Rplp1	1.45e-193	0.176229	0.989	0.973	2.22141e-189
Bin2	1.49176e-193	-0.259062	0.753	0.839	2.28537e-189
Rasgrp3	2.89364e-193	-0.293121	0.481	0.638	4.43306e-189
Nap1l1	4.1744e-193	0.293634	0.522	0.334	6.39518e-189
Chd9	5.15579e-191	-0.338384	0.566	0.69	7.89866e-187
Pwwp2a	4.80539e-190	-0.312948	0.472	0.624	7.36186e-186
Gtf2h2	8.18464e-190	-0.291793	0.477	0.621	1.25389e-185
Klf3	5.35415e-189	-0.295311	0.535	0.668	8.20256e-185
Il1a	8.14092e-189	0.66571	0.57	0.473	1.24719e-184
Iffo1	2.83413e-188	-0.309334	0.304	0.471	4.34189e-184
Tmem176a	4.56209e-188	0.342359	0.792	0.705	6.98913e-184
Rin2	6.69683e-188	-0.285319	0.478	0.643	1.02595e-183
Scamp2	8.37218e-188	-0.233633	0.848	0.888	1.28262e-183
Laptm4a	2.14704e-187	-0.219923	0.831	0.88	3.28927e-183
Lpcat3	1.00276e-186	-0.271403	0.446	0.587	1.53623e-182
Lmo2	1.40705e-185	-0.256528	0.692	0.792	2.1556e-181
H3f3a	1.63042e-185	0.265226	0.937	0.919	2.4978e-181
Taz	2.20698e-185	-0.271225	0.354	0.536	3.38109e-181
Inpp4b	3.36528e-185	-0.283178	0.269	0.444	5.1556e-181
Wasf2	3.62057e-185	-0.252409	0.769	0.831	5.54672e-181
Tacc1	9.09656e-185	-0.281267	0.703	0.78	1.39359e-180
1700017B05Rik	2.45692e-184	-0.29235	0.491	0.642	3.764e-180
Rabac1	4.04588e-184	-0.216503	0.775	0.836	6.19828e-180
Zdhhc20	5.68325e-184	-0.276092	0.373	0.528	8.70674e-180
Serinc1	1.14033e-183	-0.242682	0.686	0.786	1.74699e-179
Gm6277	1.31292e-183	-0.200973	0.063	0.193	2.01139e-179
Tmcc3	5.59409e-183	-0.304019	0.588	0.719	8.57014e-179
Slc16a6	6.99574e-182	-0.297889	0.54	0.674	1.07175e-177
Ptpre	8.19128e-182	-0.297351	0.537	0.675	1.2549e-177
Nr4a1	2.05514e-180	0.436645	0.442	0.26	3.14847e-176
Cirbp	4.99354e-179	-0.265046	0.264	0.435	7.6501e-175
Rgs2	1.14135e-178	-0.314017	0.771	0.857	1.74854e-174
Rbm3	2.09675e-178	0.278716	0.696	0.63	3.21223e-174
Upk1b	5.61505e-177	-0.308459	0.241	0.403	8.60226e-173
Nptn	6.31971e-177	-0.260074	0.658	0.766	9.68179e-173
Phf14	2.12148e-176	-0.300019	0.529	0.661	3.25011e-172
Mcfd2	3.43785e-176	-0.256084	0.433	0.576	5.26678e-172
Pfn1	5.21556e-176	0.245146	0.936	0.935	7.99024e-172
Slc40a1	4.62589e-175	-0.315456	0.367	0.542	7.08686e-171
P4ha1	1.8009e-174	-0.277367	0.617	0.722	2.75898e-170
Unc93b1	3.26602e-174	-0.209251	0.924	0.941	5.00354e-170
Pura	4.3958e-174	-0.268197	0.582	0.689	6.73437e-170
Tmbim6	8.48686e-174	-0.183556	0.911	0.929	1.30019e-169
Camk2d	1.27044e-173	-0.296559	0.495	0.627	1.94631e-169
Cox7c	1.81746e-173	0.240556	0.831	0.777	2.78435e-169
Fmnl3	1.96454e-173	-0.265273	0.342	0.503	3.00967e-169
Spred1	2.03032e-173	-0.254967	0.273	0.435	3.11046e-169
Actg1	1.19413e-172	0.353358	0.932	0.925	1.8294e-168
Mcub	4.38078e-172	0.140082	0.115	0.021	6.71135e-168
Tmem44	4.4023e-172	-0.191422	0.048	0.164	6.74433e-168
Mat2a	1.69271e-171	-0.302797	0.403	0.56	2.59324e-167
Cox5b	3.49345e-171	0.263174	0.725	0.636	5.35196e-167
Ptgs2	7.12608e-171	0.361196	0.128	0.027	1.09171e-166
Cep68	9.6094e-171	-0.251001	0.175	0.334	1.47216e-166
Abcc3	7.60871e-170	-0.255504	0.254	0.416	1.16565e-165
Kif21b	9.07053e-170	-0.293114	0.39	0.543	1.3896e-165
Nes	4.72425e-169	0.14849	0.117	0.022	7.23755e-165
Pip4k2a	6.26549e-169	-0.25736	0.582	0.691	9.59873e-165
Clic4	2.32901e-168	0.21148	0.177	0.055	3.56804e-164
Cd302	4.95444e-168	-0.252569	0.529	0.662	7.59021e-164
Prkca	6.58534e-168	-0.237304	0.201	0.364	1.00887e-163
Cttnbp2nl	1.07826e-166	-0.252464	0.707	0.801	1.65189e-162
Entpd1	2.32269e-166	-0.219277	0.781	0.849	3.55836e-162
Comt	2.49027e-166	-0.221005	0.794	0.851	3.81509e-162
Ptp4a3	2.53744e-166	-0.259637	0.465	0.597	3.88735e-162
Dock10	9.12132e-166	-0.28405	0.675	0.766	1.39739e-161
Maml3	6.16808e-165	-0.27813	0.292	0.455	9.4495e-161
Ppcdc	6.51947e-165	-0.266876	0.48	0.628	9.98783e-161
G3bp2	8.02677e-165	-0.258487	0.481	0.608	1.2297e-160
Cfl1	1.94254e-164	0.252589	0.926	0.925	2.97597e-160
mt-Nd5	3.43616e-164	0.251606	0.83	0.744	5.26419e-160
Gpi1	5.25168e-164	0.261618	0.694	0.562	8.04558e-160
Cd63	5.50878e-164	0.362401	0.855	0.828	8.43945e-160
Tpm4	6.20556e-164	0.233628	0.332	0.169	9.50692e-160
Asph	7.57104e-164	-0.252879	0.646	0.747	1.15988e-159
Anxa5	8.67309e-164	0.290478	0.415	0.243	1.32872e-159
Rtn4rl1	1.24289e-163	-0.264508	0.406	0.552	1.9041e-159
Cks2	2.8029e-163	0.343501	0.225	0.103	4.29404e-159
Pecam1	9.04613e-163	-0.170938	0.055	0.175	1.38587e-158
Lrp1	1.5328e-162	-0.248747	0.706	0.801	2.34826e-158
Gm2a	2.85403e-162	0.287253	0.691	0.58	4.37238e-158
Mafg	7.91749e-162	-0.292942	0.472	0.611	1.21296e-157
Dusp2	9.02598e-162	0.382323	0.248	0.104	1.38278e-157
Gm32849	1.32289e-161	-0.271095	0.151	0.302	2.02666e-157
Apoe	1.348e-161	-0.0609921	0.658	0.503	2.06513e-157
Macf1	1.35887e-161	-0.302545	0.811	0.86	2.08179e-157
Siglece	4.3667e-161	-0.219635	0.185	0.342	6.68978e-157
Eif4a2	6.0989e-161	-0.247707	0.633	0.737	9.34352e-157
Snx18	9.92655e-161	-0.248904	0.662	0.759	1.52075e-156
Rassf3	3.49595e-160	0.211986	0.294	0.141	5.35579e-156
H2-Q7	5.48284e-160	0.230504	0.232	0.094	8.39971e-156
Osm	1.87615e-159	0.355139	0.359	0.198	2.87427e-155
Evl	2.00903e-159	-0.243963	0.522	0.641	3.07784e-155
Fundc2	1.40751e-158	0.233863	0.368	0.205	2.1563e-154
Tgfbr2	2.9603e-158	-0.243021	0.612	0.727	4.53518e-154
Mfap3	1.06441e-157	-0.253887	0.302	0.446	1.63068e-153
Crip1	1.89756e-157	0.581147	0.218	0.086	2.90706e-153
Snrnp70	1.91661e-157	-0.27397	0.77	0.842	2.93624e-153
Fam110a	3.54353e-157	-0.232642	0.175	0.32	5.42868e-153
Ndufa1	4.87984e-157	0.269579	0.564	0.412	7.47591e-153
Zfp710	9.23351e-157	-0.264481	0.424	0.559	1.41457e-152
Nckap1l	1.64933e-156	-0.246441	0.592	0.696	2.52678e-152
Ubc	4.41194e-156	-0.334063	0.938	0.962	6.7591e-152
S100a4	8.86209e-156	0.361845	0.121	0.027	1.35767e-151
Sdc3	9.66495e-156	0.173103	0.261	0.116	1.48067e-151
Mlxipl	1.36532e-155	-0.284569	0.284	0.438	2.09166e-151
Abl1	1.62634e-155	-0.253633	0.29	0.442	2.49155e-151
Naaa	1.94923e-155	0.266368	0.408	0.249	2.98622e-151
Fubp1	5.44627e-155	-0.27827	0.483	0.622	8.34369e-151
AC149090.1	1.32987e-154	-0.275241	0.692	0.804	2.03736e-150
Dna2	2.00073e-154	0.106521	0.11	0.022	3.06511e-150
Hhex	3.12162e-154	-0.250683	0.427	0.576	4.78232e-150
Eef1g	6.26288e-154	0.249533	0.748	0.656	9.59473e-150
Dnm2	7.24766e-154	-0.250387	0.508	0.634	1.11034e-149
Olfml3	7.94178e-154	-0.201308	0.9	0.93	1.21668e-149
Mcl1	1.24943e-153	0.306815	0.868	0.845	1.91412e-149
Nek6	3.05422e-153	-0.23271	0.242	0.4	4.67907e-149
Hexb	1.00014e-152	-0.220408	0.98	0.986	1.53221e-148
Dbi	7.32107e-152	0.287263	0.583	0.47	1.12159e-147
Dip2b	8.30013e-152	-0.269458	0.465	0.596	1.27158e-147
Tlr13	1.10317e-151	-0.211971	0.171	0.318	1.69006e-147
Arglu1	7.4136e-151	-0.276131	0.579	0.694	1.13576e-146
Tacc3	1.1548e-150	0.158752	0.108	0.022	1.76915e-146
Smc4	1.66338e-150	0.30056	0.184	0.071	2.5483e-146
Selenop	1.83179e-150	-0.149937	0.937	0.957	2.80631e-146
Bmp2k	2.61774e-150	-0.234567	0.747	0.814	4.01038e-146
Tm6sf1	2.66222e-150	-0.262962	0.635	0.742	4.07851e-146
Prex1	6.80322e-150	-0.251275	0.577	0.688	1.04225e-145
Atp5c1	1.23843e-149	0.224044	0.774	0.705	1.89727e-145
Rock2	1.74377e-149	-0.261249	0.656	0.737	2.67145e-145
Eif3i	4.90582e-149	0.247019	0.643	0.512	7.51572e-145
Irf2bpl	1.2961e-148	-0.252761	0.301	0.463	1.98563e-144
Selenoh	2.58334e-148	0.266312	0.388	0.24	3.95767e-144
Ophn1	4.32069e-148	-0.263433	0.631	0.744	6.6193e-144
Bcl2l1	7.70229e-148	-0.21374	0.176	0.321	1.17999e-143
Mlph	2.90688e-147	-0.254145	0.27	0.433	4.45334e-143
Trem2	3.28022e-147	-0.156287	0.927	0.956	5.0253e-143
Cd180	3.55963e-147	-0.273291	0.484	0.628	5.45336e-143
Cd44	7.49624e-147	0.12393	0.103	0.023	1.14842e-142
Anxa2	4.36412e-146	0.271332	0.119	0.028	6.68582e-142
Plcl2	8.52573e-146	-0.24749	0.353	0.502	1.30614e-141
Arrb2	1.04329e-145	-0.248613	0.528	0.651	1.59832e-141
Cdkn2c	1.47866e-145	0.187044	0.138	0.043	2.26531e-141
Myo18b	3.10736e-145	-0.185254	0.054	0.162	4.76047e-141
Nr3c1	8.0601e-145	-0.2352	0.603	0.698	1.23481e-140
Soga1	1.74092e-144	-0.259486	0.338	0.486	2.66709e-140
Rgs10	3.17283e-144	-0.141475	0.948	0.954	4.86077e-140
Clec5a	3.33342e-144	-0.23791	0.403	0.544	5.1068e-140
Fcrl1	1.44575e-143	-0.173737	0.093	0.222	2.21488e-139
C1qa	2.04323e-143	-0.172971	0.956	0.975	3.13022e-139
Cstb	3.83324e-143	0.301557	0.544	0.397	5.87253e-139
Lpar6	1.20181e-142	-0.308559	0.422	0.568	1.84118e-138
Rab14	2.37842e-142	-0.196931	0.858	0.891	3.64374e-138
H2afx	1.18141e-141	0.348682	0.177	0.079	1.80992e-137
Tagln2	1.93113e-141	0.375777	0.432	0.311	2.95849e-137
Lyn	4.45181e-141	-0.185582	0.838	0.878	6.82017e-137
Orai1	4.82904e-141	-0.220315	0.668	0.753	7.39809e-137
Gcn1l1	5.28442e-141	-0.252361	0.333	0.478	8.09573e-137
Agmo	5.47984e-141	-0.21932	0.239	0.394	8.39511e-137
Cnbp	8.77457e-141	-0.212875	0.699	0.784	1.34426e-136
Arid1a	1.06783e-140	-0.252167	0.538	0.638	1.63592e-136
Cybb	1.27555e-140	0.163476	0.159	0.06	1.95414e-136
Lims1	4.86715e-140	-0.22657	0.59	0.693	7.45647e-136
Cdk5r1	8.73478e-140	-0.230029	0.167	0.309	1.33817e-135
Gm10073	1.54588e-139	0.220873	0.495	0.326	2.36829e-135
Txn1	6.04219e-139	0.280975	0.525	0.398	9.25663e-135
mt-Nd3	8.34189e-139	-0.25251	0.746	0.786	1.27798e-134
Nfkbiz	8.58839e-139	0.354569	0.458	0.296	1.31574e-134
Mid1ip1	2.65428e-138	-0.266432	0.442	0.578	4.06635e-134
Hnrnph1	3.03532e-138	-0.264642	0.485	0.616	4.65012e-134
Tlr2	6.58134e-138	0.341417	0.521	0.426	1.00826e-133
Ralgps1	8.41726e-138	-0.183194	0.095	0.217	1.28952e-133
Herc2	1.4957e-137	-0.267512	0.589	0.69	2.29142e-133
Cd33	3.83662e-137	-0.23223	0.734	0.816	5.8777e-133
Il3ra	4.6262e-137	0.110842	0.137	0.04	7.08734e-133
Cox6a1	8.65122e-137	0.24414	0.686	0.591	1.32537e-132
Pkm	1.51457e-136	0.273377	0.728	0.668	2.32032e-132
Atp5j2	1.79372e-136	0.228055	0.74	0.681	2.74798e-132
Mtss1	1.89768e-136	-0.228014	0.228	0.381	2.90725e-132
Sh2b3	1.83276e-135	-0.225197	0.276	0.41	2.80778e-131
Rps27	2.28892e-135	0.182272	0.969	0.947	3.50663e-131
Gm9493	4.64207e-135	0.157807	0.22	0.094	7.11165e-131
Jund	1.10423e-134	-0.392116	0.836	0.892	1.69168e-130
Msrb2	1.13046e-134	-0.208741	0.251	0.398	1.73186e-130
Med12l	1.19163e-134	-0.187808	0.088	0.207	1.82557e-130
Slc7a7	2.81406e-134	-0.228166	0.378	0.503	4.31114e-130
Rgmb	1.52493e-133	-0.223815	0.255	0.406	2.33619e-129
Akr1a1	3.34099e-133	0.197592	0.825	0.783	5.1184e-129
Bcl2a1a	4.52128e-133	0.278831	0.371	0.231	6.92661e-129
Mbnl2	2.49464e-132	-0.244582	0.482	0.601	3.82179e-128
Ier2	3.30164e-132	0.306668	0.507	0.338	5.05811e-128
Tnfsf9	3.55091e-132	0.467262	0.172	0.065	5.43999e-128
Ier3	4.99808e-132	0.447351	0.584	0.443	7.65706e-128
Sub1	6.24903e-132	0.259099	0.73	0.657	9.57352e-128
Cxcr4	1.32926e-131	0.174558	0.103	0.023	2.03643e-127
Fam49b	3.59272e-131	-0.185461	0.876	0.917	5.50405e-127
Nars	7.25722e-131	-0.227891	0.555	0.657	1.11181e-126
Gpr183	1.00178e-130	-0.292169	0.651	0.755	1.53473e-126
BC037034	1.24106e-130	-0.233386	0.358	0.507	1.9013e-126
Armc3	2.59924e-130	-0.151024	0.061	0.162	3.98203e-126
Tkt	2.66466e-130	0.247463	0.653	0.553	4.08225e-126
Ifrd1	4.12008e-130	0.421018	0.414	0.303	6.31196e-126
Man1a2	4.80355e-130	-0.231714	0.685	0.761	7.35904e-126
Dtx4	4.95937e-130	-0.223796	0.291	0.428	7.59775e-126
Snrpe	6.37544e-130	0.243963	0.623	0.507	9.76718e-126
Cox6b1	6.53733e-130	0.21801	0.786	0.729	1.00152e-125
Gpr155	4.46562e-129	-0.227673	0.332	0.48	6.84133e-125
S100a6	4.55463e-129	0.612097	0.108	0.025	6.97769e-125
Hes1	9.97236e-129	-0.357612	0.101	0.219	1.52777e-124
Tm9sf2	2.56503e-128	-0.216322	0.506	0.617	3.92963e-124
Selenos	2.6738e-128	-0.216563	0.637	0.736	4.09626e-124
Bid	1.25791e-127	-0.18269	0.133	0.257	1.92711e-123
Ms4a6b	2.74459e-127	-0.226561	0.421	0.568	4.20471e-123
Ezh2	3.77466e-127	0.182125	0.14	0.046	5.78278e-123
Tuba1c	4.13534e-127	0.157321	0.15	0.051	6.33534e-123
Tsc22d4	8.63323e-127	-0.219712	0.704	0.774	1.32261e-122
Glipr1	9.63911e-127	0.164726	0.21	0.09	1.47671e-122
Celf1	1.69601e-126	-0.247822	0.433	0.549	2.59829e-122
Lgals3	1.88659e-126	0.524389	0.124	0.035	2.89026e-122
Pou2f2	2.16372e-126	-0.236604	0.789	0.851	3.31482e-122
Atp5l	2.78871e-126	0.224105	0.783	0.719	4.2723e-122
Jam3	6.64016e-126	-0.139754	0.064	0.17	1.01727e-121
Plekho2	9.27447e-126	0.233134	0.316	0.18	1.42085e-121
Snx17	9.56479e-126	-0.216082	0.566	0.666	1.46533e-121
Tcf4	1.60303e-125	-0.244983	0.64	0.73	2.45584e-121
Ppp3ca	2.70927e-125	-0.227474	0.545	0.647	4.1506e-121
Arl1	5.85221e-125	-0.205206	0.555	0.65	8.96558e-121
Serpine2	9.07781e-125	-0.214577	0.739	0.837	1.39072e-120
Tmem50a	3.41141e-124	-0.167091	0.86	0.891	5.22627e-120
Dync1i2	6.26809e-124	-0.236539	0.523	0.628	9.60271e-120
Abca9	1.36191e-123	-0.238443	0.586	0.691	2.08645e-119
Zbtb7a	2.3097e-123	-0.238973	0.436	0.561	3.53845e-119
Rubcnl	2.31533e-123	-0.173678	0.122	0.244	3.54708e-119
Eif4g2	2.36703e-123	-0.200348	0.73	0.786	3.62629e-119
Il21r	3.7446e-123	-0.220006	0.507	0.625	5.73673e-119
Fam208a	8.93506e-123	-0.240305	0.305	0.449	1.36885e-118
Wsb1	1.08722e-122	-0.245522	0.52	0.639	1.66562e-118
Wdr89	1.25625e-122	0.164779	0.298	0.159	1.92457e-118
Fam212a	1.98662e-122	-0.215758	0.301	0.442	3.04349e-118
Celf2	3.43542e-122	-0.22797	0.748	0.811	5.26306e-118
Tmed10	3.67778e-122	-0.188249	0.82	0.864	5.63437e-118
H2afv	3.9785e-122	0.310635	0.464	0.364	6.09506e-118
Ddx5	5.3244e-122	-0.156417	0.941	0.954	8.15699e-118
Idh2	5.78161e-122	-0.218951	0.421	0.543	8.85743e-118
Bin1	2.19699e-121	-0.172638	0.891	0.928	3.36579e-117
I830077J02Rik	2.27673e-121	-0.210232	0.229	0.364	3.48795e-117
Hivep3	3.60244e-121	-0.23684	0.361	0.5	5.51894e-117
Plod1	4.20418e-121	-0.219003	0.39	0.516	6.4408e-117
Trio	1.18915e-120	-0.24084	0.283	0.417	1.82178e-116
Mkln1	2.24831e-120	-0.245991	0.5	0.616	3.44442e-116
Bri3	1.11367e-119	0.221701	0.874	0.836	1.70614e-115
Atf3	1.21248e-119	0.373725	0.611	0.467	1.85752e-115
Itpr2	1.86969e-119	-0.238721	0.491	0.605	2.86436e-115
Atp2c1	5.58512e-119	-0.267978	0.609	0.704	8.55641e-115
Tmem204	7.56009e-119	-0.132627	0.06	0.16	1.15821e-114
Anxa3	7.89598e-119	-0.183359	0.828	0.898	1.20966e-114
Tgm2	8.14643e-119	-0.185692	0.125	0.244	1.24803e-114
Maff	9.31611e-119	0.113493	0.125	0.038	1.42723e-114
Ogt	1.53882e-118	-0.239929	0.485	0.61	2.35748e-114
Xbp1	3.21281e-118	-0.225776	0.534	0.642	4.92202e-114
Ddx3x	5.3833e-118	-0.296301	0.536	0.632	8.24721e-114
Rps27l	7.63248e-118	0.24839	0.619	0.533	1.1693e-113
Nsa2	9.03509e-118	0.227374	0.718	0.594	1.38418e-113
Hsp90aa1	9.4366e-118	-0.420401	0.725	0.796	1.44569e-113
Adap2	1.04521e-117	-0.237644	0.74	0.816	1.60126e-113
Pten	1.07432e-117	-0.215582	0.556	0.646	1.64585e-113
Hk2	1.43747e-117	-0.304877	0.58	0.673	2.20221e-113
Smad7	1.98136e-117	-0.311605	0.698	0.782	3.03545e-113
Hist1h2ae	3.27973e-117	0.375237	0.115	0.041	5.02455e-113
Sbf2	3.30269e-117	-0.228088	0.305	0.437	5.05972e-113
Ninj1	4.10912e-117	-0.215353	0.365	0.508	6.29518e-113
Rps12-ps3	4.25363e-117	0.118793	0.179	0.073	6.51656e-113
Mgat1	8.0341e-117	-0.214655	0.404	0.534	1.23082e-112
Zfp36	1.28385e-116	0.286574	0.857	0.795	1.96685e-112
Tmem176b	1.32195e-116	0.221846	0.872	0.841	2.02523e-112
Fgd2	2.09126e-116	-0.222657	0.679	0.767	3.20381e-112
AU020206	2.70581e-116	0.225678	0.479	0.331	4.1453e-112
Rilpl1	5.42528e-116	-0.208504	0.315	0.443	8.31153e-112
Itgam	5.51e-116	-0.180267	0.823	0.881	8.44132e-112
Psme1	6.24071e-116	0.226184	0.785	0.709	9.56076e-112
Fgl2	1.81452e-115	0.180528	0.166	0.065	2.77984e-111
Srrm2	2.11945e-115	-0.211145	0.885	0.913	3.24699e-111
Samsn1	2.61029e-115	-0.219781	0.526	0.643	3.99897e-111
Hnrnpa1	4.18217e-115	0.230643	0.641	0.555	6.40708e-111
Arhgef1	7.00421e-115	-0.233262	0.396	0.521	1.07305e-110
Dst	9.99091e-115	-0.285606	0.599	0.705	1.53061e-110
Ndufb11	1.88953e-114	0.222021	0.691	0.588	2.89475e-110
Sft2d2	2.40122e-114	-0.206828	0.323	0.454	3.67867e-110
Nfam1	5.75859e-114	-0.222538	0.451	0.557	8.82216e-110
Tgif1	1.4805e-113	0.244591	0.465	0.325	2.26812e-109
Gpr65	4.8135e-113	0.116153	0.152	0.058	7.37428e-109
Cbl	5.06905e-113	-0.226644	0.493	0.59	7.76579e-109
Bcl9l	5.8919e-113	-0.181409	0.144	0.264	9.02638e-109
Nrros	6.18827e-113	-0.213793	0.4	0.537	9.48044e-109
Tcn2	7.15651e-113	-0.188139	0.713	0.778	1.09638e-108
Fli1	8.5819e-113	-0.209965	0.481	0.594	1.31475e-108
Ran	1.62242e-112	0.246747	0.634	0.635	2.48554e-108
Gmnn	2.12019e-112	0.129905	0.126	0.04	3.24813e-108
Zfp950	2.14092e-112	-0.240719	0.215	0.351	3.27989e-108
Ly86	2.43304e-112	0.206031	0.964	0.965	3.72742e-108
Git2	2.56756e-112	-0.2382	0.684	0.755	3.9335e-108
Clstn1	2.9579e-112	-0.188347	0.224	0.361	4.5315e-108
Rps6ka1	3.08425e-112	-0.202142	0.556	0.648	4.72507e-108
Atp5h	3.48569e-112	0.204265	0.821	0.775	5.34008e-108
Rap1b	6.49586e-112	-0.179627	0.84	0.886	9.95166e-108
Cdh23	8.94746e-112	-0.128149	0.042	0.126	1.37075e-107
Pmaip1	1.66976e-111	0.158856	0.17	0.068	2.55807e-107
Id2	1.68239e-111	0.273973	0.452	0.301	2.57742e-107
Jun	2.1072e-111	-0.390302	0.848	0.889	3.22824e-107
Rtcb	2.16846e-111	0.218487	0.536	0.409	3.32208e-107
Zfp90	2.79051e-111	-0.209536	0.316	0.458	4.27506e-107
C5ar2	4.79843e-111	-0.196448	0.165	0.288	7.35119e-107
Mfng	9.77244e-111	-0.205597	0.389	0.517	1.49714e-106
Ggta1	1.17296e-110	-0.186545	0.202	0.333	1.79698e-106
Snx6	3.09886e-110	-0.209702	0.598	0.674	4.74745e-106
Smim3	4.24919e-110	0.155274	0.261	0.136	6.50976e-106
Smc2	5.56113e-110	0.282862	0.186	0.095	8.51965e-106
Polr1d	6.50375e-110	0.212857	0.675	0.581	9.96375e-106
Ehd1	7.78525e-110	0.129631	0.11	0.032	1.1927e-105
Tk2	9.75445e-110	-0.171701	0.153	0.28	1.49438e-105
Eng	1.27345e-109	-0.18865	0.255	0.391	1.95093e-105
Ttc14	1.39026e-109	-0.242329	0.489	0.602	2.12989e-105
Parvg	2.22844e-109	-0.193818	0.276	0.387	3.41397e-105
Pdgfb	6.68596e-109	-0.281615	0.536	0.654	1.02429e-104
Tpm3	8.7114e-109	-0.174175	0.868	0.902	1.33459e-104
Ldhb	1.76591e-108	-0.17913	0.835	0.874	2.70538e-104
Cebpz	5.60736e-108	-0.226456	0.48	0.573	8.59047e-104
Cops4	7.18067e-108	-0.191869	0.443	0.551	1.10008e-103
Cd82	1.34677e-107	-0.198531	0.38	0.5	2.06325e-103
Lgals1	1.93829e-107	0.196226	0.144	0.054	2.96945e-103
Ctso	3.17174e-107	-0.200486	0.335	0.462	4.85911e-103
Nos1ap	4.06846e-107	-0.208709	0.145	0.259	6.23289e-103
Tlr3	4.55168e-107	-0.197935	0.232	0.364	6.97318e-103
H2-Ab1	4.7223e-107	0.561406	0.217	0.104	7.23457e-103
Gabarap	5.20335e-107	0.16263	0.904	0.89	7.97154e-103
Zbtb4	6.40897e-107	-0.192131	0.195	0.326	9.81855e-103
Mid1	7.44818e-107	-0.158802	0.084	0.183	1.14106e-102
2010107E04Rik	7.62668e-107	0.212842	0.632	0.52	1.16841e-102
Casp8	1.068e-106	-0.201395	0.484	0.589	1.63617e-102
S100a13	1.66756e-106	0.213539	0.459	0.32	2.5547e-102
Smap2	2.61984e-106	-0.169	0.881	0.909	4.0136e-102
Gtf2i	3.22551e-106	-0.212637	0.306	0.432	4.94149e-102
Cnrip1	4.4263e-106	-0.168443	0.111	0.222	6.78109e-102
Cryl1	9.47529e-106	-0.203855	0.367	0.48	1.45161e-101
Comtd1	9.83878e-106	-0.194674	0.302	0.423	1.5073e-101
Iqgap1	1.64225e-105	0.217108	0.197	0.091	2.51593e-101
Hps3	1.80652e-105	-0.227189	0.383	0.513	2.76759e-101
Cox5a	3.21349e-105	0.21107	0.667	0.606	4.92306e-101
Ube2s	3.32295e-105	0.34014	0.467	0.392	5.09075e-101
Rpl27	4.7332e-105	0.197944	0.787	0.713	7.25126e-101
Tubb4b	5.45215e-105	0.322887	0.223	0.165	8.35269e-101
Tnfrsf21	5.64508e-105	-0.193137	0.376	0.49	8.64827e-101
Cyba	8.80658e-105	0.163856	0.967	0.95	1.34917e-100
Clcn4	9.98239e-105	-0.20205	0.391	0.507	1.5293e-100
Nfatc2	1.04693e-104	-0.18357	0.154	0.272	1.6039e-100
Tbxas1	1.64535e-104	-0.202705	0.579	0.685	2.52068e-100
Rasgef1b	1.98573e-104	0.267499	0.33	0.211	3.04213e-100
Plxna4	3.59964e-104	-0.183058	0.163	0.287	5.51465e-100
Peak1	3.69169e-104	-0.185162	0.162	0.282	5.65567e-100
Arpc3	4.61128e-104	0.172289	0.876	0.862	7.06447e-100
H2afj	6.63562e-104	0.240087	0.502	0.371	1.01658e-99
Zfp652	7.23927e-104	-0.220233	0.524	0.624	1.10906e-99
Sem1	8.10285e-104	0.220205	0.729	0.671	1.24136e-99
Psmb1	9.84779e-104	0.201056	0.756	0.679	1.50868e-99
Ublcp1	1.18637e-103	-0.170918	0.162	0.273	1.81751e-99
Itgav	1.76947e-103	-0.221042	0.387	0.508	2.71083e-99
Il2rg	2.00481e-103	0.109358	0.115	0.037	3.07137e-99
Acp2	3.77441e-103	-0.211985	0.417	0.533	5.7824e-99
Rbm25	4.05839e-103	-0.228996	0.73	0.793	6.21745e-99
Rpl4	5.11927e-103	0.167052	0.901	0.877	7.84272e-99
Mif	5.5301e-103	0.268261	0.617	0.522	8.47211e-99
Reep3	6.9098e-103	-0.194816	0.545	0.619	1.05858e-98
Capza2	9.1033e-103	-0.141642	0.925	0.94	1.39463e-98
Srgn	1.42558e-102	0.295849	0.775	0.742	2.18398e-98
Ctsc	2.71087e-102	0.226342	0.866	0.849	4.15305e-98
Chsy1	4.1267e-102	-0.174452	0.164	0.28	6.32211e-98
P2ry10b	4.24871e-102	-0.151846	0.092	0.192	6.50902e-98
Gm42418	4.5042e-102	-0.414625	0.986	0.99	6.90043e-98
Myo5a	1.63062e-101	0.07943	0.144	0.058	2.49811e-97
Leng8	1.88874e-101	-0.204418	0.205	0.327	2.89355e-97
Clec2d	6.10734e-101	0.178776	0.327	0.195	9.35645e-97
Sgce	8.15204e-101	-0.199834	0.42	0.539	1.24889e-96
Chst8	9.00094e-101	-0.119289	0.046	0.129	1.37894e-96
Ythdf2	9.35786e-101	-0.197552	0.307	0.418	1.43362e-96
Phgdh	1.08891e-100	-0.202015	0.405	0.538	1.66822e-96
Garnl3	1.3814e-100	-0.208753	0.231	0.361	2.1163e-96
Slc9a9	1.53468e-100	-0.210135	0.327	0.445	2.35113e-96
Lifr	2.33451e-100	-0.176255	0.176	0.3	3.57646e-96
Sec62	2.42447e-100	-0.184512	0.692	0.757	3.71428e-96
Ulk2	6.65113e-100	-0.210435	0.402	0.52	1.01895e-95
Tspan4	1.20441e-99	-0.197584	0.4	0.518	1.84515e-95
Usp22	1.30475e-99	-0.177323	0.182	0.293	1.99888e-95
B230219D22Rik	1.47467e-99	-0.206121	0.417	0.524	2.25919e-95
Luc7l2	1.62008e-99	-0.216893	0.768	0.825	2.48196e-95
Iscu	4.58587e-99	-0.182171	0.637	0.704	7.02556e-95
Afap1l1	5.35548e-99	-0.120883	0.051	0.135	8.20459e-95
Epn2	9.8731e-99	-0.139583	0.072	0.167	1.51256e-94
Tnfrsf13b	1.17671e-98	-0.197838	0.355	0.466	1.80271e-94
Ets1	1.77054e-98	-0.194011	0.31	0.441	2.71247e-94
Trp53cor1	1.98506e-98	-0.11991	0.051	0.136	3.0411e-94
Cflar	2.79583e-98	-0.223847	0.601	0.69	4.28321e-94
Slc29a1	3.45475e-98	-0.185296	0.334	0.464	5.29268e-94
Cpd	6.54969e-98	0.164274	0.275	0.155	1.00341e-93
Zfpm1	7.3772e-98	-0.154349	0.117	0.223	1.13019e-93
Hnrnpk	2.85106e-97	-0.169192	0.818	0.864	4.36783e-93
Gusb	4.96491e-97	0.191368	0.751	0.712	7.60624e-93
Pomp	8.79816e-97	0.177249	0.827	0.8	1.34788e-92
Rptor	9.55966e-97	-0.230118	0.328	0.448	1.46454e-92
Ptpn6	2.94711e-96	-0.193563	0.616	0.693	4.51498e-92
Ly6e	3.58622e-96	0.187114	0.928	0.934	5.49408e-92
Ang	3.78198e-96	-0.197947	0.591	0.685	5.794e-92
Zcchc7	3.90998e-96	-0.238398	0.396	0.515	5.99009e-92
Rtn3	4.78591e-96	-0.179369	0.638	0.717	7.33202e-92
Rtraf	1.03793e-95	0.1884	0.731	0.653	1.59011e-91
Vmp1	1.16136e-95	0.233681	0.559	0.451	1.7792e-91
Pfdn5	1.85526e-95	0.165684	0.917	0.889	2.84226e-91
Arap3	4.1174e-95	-0.187253	0.208	0.323	6.30785e-91
Csnk1a1	4.31766e-95	-0.198645	0.656	0.728	6.61466e-91
Map4k4	5.35253e-95	-0.221802	0.712	0.78	8.20007e-91
Clasp2	7.71018e-95	-0.214557	0.408	0.523	1.1812e-90
Nfe2l2	7.72986e-95	0.23865	0.751	0.728	1.18421e-90
Ctc1	7.88557e-95	-0.19933	0.486	0.589	1.20807e-90
Ncbp3	1.2091e-94	-0.196038	0.239	0.354	1.85234e-90
Pld1	4.9927e-94	-0.217206	0.28	0.399	7.64882e-90
Ubl5	1.16147e-93	0.196016	0.748	0.68	1.77938e-89
Arhgap30	1.33067e-93	-0.223755	0.492	0.584	2.03859e-89
Sypl	1.47054e-93	-0.1861	0.46	0.567	2.25287e-89
Sh3bgrl	1.57266e-93	0.122308	0.163	0.071	2.40931e-89
Tmx4	3.27913e-93	-0.327231	0.401	0.492	5.02362e-89
Ppp1r15a	3.82679e-93	0.260168	0.526	0.389	5.86264e-89
Ptrhd1	4.03112e-93	0.153328	0.301	0.178	6.17568e-89
Map2k1	4.39923e-93	-0.182188	0.372	0.478	6.73961e-89
Ppm1l	5.48623e-93	-0.137953	0.078	0.172	8.4049e-89
Gpr84	6.95082e-93	-0.183645	0.351	0.489	1.06487e-88
Ier5	7.02432e-93	-0.262576	0.869	0.894	1.07613e-88
Pald1	1.40356e-92	-0.181992	0.308	0.42	2.15025e-88
Havcr2	1.50246e-92	-0.183568	0.626	0.707	2.30178e-88
S100a1	3.17046e-92	0.123271	0.184	0.087	4.85715e-88
Klk8	3.65202e-92	-0.199675	0.552	0.65	5.5949e-88
Mrpl30	5.51992e-92	0.193322	0.487	0.355	8.45652e-88
Mcm5	6.22837e-92	0.11644	0.106	0.035	9.54187e-88
Ppp1r9a	8.06492e-92	-0.215433	0.434	0.558	1.23555e-87
Slc50a1	1.03649e-91	-0.182908	0.458	0.563	1.5879e-87
Tmem206	1.18625e-91	-0.166405	0.225	0.337	1.81733e-87
Tfe3	1.37795e-91	-0.213753	0.437	0.545	2.11102e-87
Rap1gds1	3.06368e-91	-0.190038	0.48	0.579	4.69356e-87
Tnfaip3	3.71992e-91	0.254884	0.442	0.312	5.69892e-87
Alox5ap	5.5246e-91	-0.156224	0.78	0.858	8.46368e-87
Ppp1r18	6.71339e-91	-0.176194	0.54	0.612	1.02849e-86
Ssh2	7.46469e-91	-0.199814	0.827	0.87	1.14359e-86
Tspan14	7.53025e-91	-0.184096	0.52	0.614	1.15363e-86
Prelid1	8.91092e-91	0.203936	0.517	0.41	1.36515e-86
Ptms	9.44528e-91	0.19629	0.832	0.8	1.44702e-86
Rnf167	1.37196e-90	-0.184726	0.288	0.407	2.10185e-86
Acap2	1.998e-90	-0.194757	0.477	0.561	3.06094e-86
Nisch	3.30952e-90	-0.208702	0.561	0.643	5.07018e-86
Cln8	4.48224e-90	-0.189233	0.287	0.396	6.86679e-86
Gprasp1	4.67213e-90	-0.157228	0.132	0.241	7.1577e-86
Bola2	5.59228e-90	0.185417	0.448	0.317	8.56737e-86
Tle3	1.36928e-89	-0.194372	0.219	0.329	2.09773e-85
Arvcf	1.53307e-89	-0.131736	0.081	0.173	2.34866e-85
Hook3	1.76709e-89	-0.21932	0.535	0.607	2.70719e-85
Socs3	2.26017e-89	0.313705	0.593	0.478	3.46258e-85
Trpm2	2.91637e-89	-0.188862	0.15	0.255	4.46788e-85
Mgat4a	5.96907e-89	-0.208642	0.629	0.706	9.14462e-85
Dock8	6.32155e-89	-0.192624	0.56	0.628	9.68461e-85
Akirin1	6.8049e-89	-0.179388	0.435	0.541	1.04251e-84
Usp24	8.73026e-89	-0.213175	0.322	0.431	1.33748e-84
Ldlrad4	1.20991e-88	-0.179769	0.262	0.375	1.85358e-84
Ifitm10	1.32351e-88	-0.143552	0.105	0.206	2.02761e-84
Fry	1.73484e-88	-0.176799	0.133	0.236	2.65777e-84
Crot	1.94747e-88	-0.174757	0.208	0.321	2.98352e-84
Bag1	2.99797e-88	0.201393	0.669	0.572	4.59289e-84
9930111J21Rik2	4.44456e-88	-0.189235	0.566	0.673	6.80907e-84
Dut	4.75362e-88	0.13644	0.107	0.037	7.28255e-84
Erp29	4.99135e-88	0.141852	0.906	0.899	7.64675e-84
Pdk1	5.54864e-88	-0.205897	0.284	0.391	8.50051e-84
Atp6ap1	8.03546e-88	-0.163266	0.643	0.708	1.23103e-83
Cfap74	1.22527e-87	-0.154307	0.097	0.194	1.87711e-83
Rab39	1.36767e-87	-0.153276	0.141	0.246	2.09528e-83
1810011H11Rik	1.40298e-87	-0.17998	0.294	0.405	2.14936e-83
Tspan18	1.62511e-87	-0.140927	0.108	0.204	2.48966e-83
Adgre1	1.66964e-87	-0.176036	0.634	0.718	2.55789e-83
Ssbp4	2.60441e-87	-0.175916	0.553	0.632	3.98995e-83
Adap2os	4.09234e-87	-0.190373	0.255	0.374	6.26947e-83
Ankrd44	4.23824e-87	-0.205693	0.551	0.65	6.49298e-83
Pttg1ip	5.39204e-87	-0.175069	0.444	0.552	8.2606e-83
Col27a1	7.4763e-87	-0.223634	0.429	0.548	1.14537e-82
Gpr162	9.18339e-87	0.105395	0.101	0.033	1.40689e-82
Nf1	1.07522e-86	-0.179984	0.219	0.327	1.64724e-82
Rgs19	1.11081e-86	-0.178674	0.399	0.498	1.70177e-82
Prpsap2	2.04472e-86	-0.171975	0.246	0.357	3.13251e-82
Tmem30a	2.17152e-86	-0.176818	0.556	0.642	3.32677e-82
Tlr4	2.41277e-86	-0.155712	0.182	0.292	3.69637e-82
Ly9	3.36856e-86	0.164424	0.217	0.116	5.16063e-82
Ap2s1	3.74186e-86	0.188723	0.547	0.431	5.73253e-82
Apc	3.98934e-86	-0.210581	0.344	0.446	6.11167e-82
Cmtm7	4.01136e-86	-0.174092	0.776	0.836	6.14541e-82
Ndufb5	4.53812e-86	0.194844	0.673	0.575	6.9524e-82
Itpkb	4.57795e-86	-0.191212	0.226	0.339	7.01343e-82
Tmem59	4.78712e-86	-0.133792	0.883	0.902	7.33387e-82
Snrpd2	4.87966e-86	0.188054	0.567	0.456	7.47563e-82
Tmco1	4.92299e-86	-0.164264	0.626	0.707	7.54202e-82
Slc25a37	5.5942e-86	-0.198193	0.239	0.351	8.57031e-82
Atp5j	6.09418e-86	0.189702	0.768	0.711	9.33628e-82
Cotl1	6.59436e-86	0.17473	0.841	0.834	1.01026e-81
Gimap6	6.6962e-86	-0.148951	0.133	0.238	1.02586e-81
Gm26735	7.54035e-86	-0.118928	0.039	0.109	1.15518e-81
Tram1	9.43065e-86	-0.174303	0.596	0.668	1.44478e-81
Ndfip2	1.08558e-85	-0.170716	0.491	0.595	1.66312e-81
Rassf4	1.86451e-85	0.205843	0.555	0.43	2.85642e-81
Numa1	2.1304e-85	-0.185011	0.427	0.527	3.26377e-81
Mtus1	2.51499e-85	-0.194258	0.557	0.649	3.85297e-81
Ighm	3.50626e-85	-0.181147	0.693	0.757	5.37159e-81
Tbca	3.51415e-85	0.184588	0.674	0.589	5.38368e-81
E2f3	3.58562e-85	-0.154663	0.126	0.223	5.49317e-81
Ccl12	3.78125e-85	0.478637	0.439	0.378	5.79287e-81
Itgax	4.51525e-85	0.0857509	0.107	0.038	6.91736e-81
Ddx17	5.43023e-85	-0.223829	0.492	0.578	8.31911e-81
Ctbp2	6.25768e-85	-0.174936	0.242	0.348	9.58677e-81
Rnaset2b	6.54683e-85	-0.172769	0.442	0.537	1.00297e-80
Wdfy2	1.31839e-84	-0.186204	0.21	0.316	2.01977e-80
Tmem55b	1.90512e-84	-0.181745	0.644	0.717	2.91864e-80
Fos	2.03509e-84	0.273763	0.572	0.437	3.11775e-80
Cd2ap	2.15622e-84	-0.19541	0.541	0.625	3.30333e-80
Arl8b	2.66195e-84	-0.17397	0.415	0.506	4.0781e-80
Gclc	3.00483e-84	-0.165599	0.214	0.316	4.60341e-80
Vapa	3.16952e-84	-0.159545	0.738	0.792	4.85571e-80
Itm2c	3.56122e-84	-0.132132	0.875	0.896	5.45578e-80
Rnaset2a	4.44695e-84	-0.17706	0.473	0.562	6.81273e-80
Zfp644	1.37712e-83	-0.191489	0.4	0.502	2.10975e-79
Naa35	1.46674e-83	-0.186084	0.453	0.545	2.24704e-79
Stard3	1.61399e-83	-0.179833	0.52	0.602	2.47263e-79
Gadd45g	1.64244e-83	-0.248642	0.101	0.196	2.51622e-79
Srsf6	1.75633e-83	-0.180879	0.411	0.513	2.6907e-79
Cep170	1.89536e-83	-0.203401	0.421	0.519	2.9037e-79
Atad2	2.49282e-83	0.20164	0.206	0.112	3.819e-79
Nufip2	3.63151e-83	-0.200459	0.326	0.437	5.56347e-79
Gm11808	4.35803e-83	0.138788	0.328	0.207	6.6765e-79
Kxd1	6.38269e-83	0.174378	0.461	0.333	9.77828e-79
Commd6	6.74673e-83	-0.163769	0.34	0.441	1.0336e-78
Abhd6	7.51729e-83	-0.186255	0.36	0.472	1.15165e-78
Cpsf6	9.28796e-83	-0.191156	0.335	0.438	1.42292e-78
Trim8	1.07422e-82	-0.199005	0.418	0.515	1.64571e-78
Fcgr1	1.09779e-82	-0.158425	0.785	0.846	1.68181e-78
Pgls	1.2486e-82	0.187773	0.656	0.567	1.91285e-78
Hnmt	1.54993e-82	-0.152885	0.203	0.316	2.37449e-78
Daglb	1.70756e-82	-0.169574	0.691	0.746	2.61598e-78
Npnt	1.80962e-82	0.179973	0.344	0.224	2.77233e-78
Cnn2	1.8526e-82	0.135613	0.216	0.115	2.83818e-78
Tor1aip1	2.32727e-82	-0.174453	0.573	0.645	3.56538e-78
Mcur1	2.78662e-82	-0.179792	0.305	0.394	4.2691e-78
Cass4	3.13571e-82	-0.104242	0.046	0.117	4.80391e-78
Eef2k	5.47147e-82	-0.187488	0.383	0.499	8.38229e-78
Eif3e	7.27645e-82	0.177122	0.684	0.597	1.11475e-77
Ccdc93	7.97792e-82	-0.184924	0.278	0.382	1.22222e-77
Zbtb20	9.65112e-82	-0.244745	0.428	0.538	1.47855e-77
Ddx18	1.00344e-81	-0.166968	0.267	0.37	1.53727e-77
Specc1	1.79999e-81	-0.207077	0.516	0.603	2.75759e-77
Ebf3	1.82488e-81	-0.137019	0.086	0.174	2.79571e-77
Bbs9	2.2182e-81	-0.140746	0.156	0.26	3.39829e-77
Smox	2.35731e-81	-0.170965	0.309	0.408	3.6114e-77
H2-DMa	2.38678e-81	0.213791	0.742	0.691	3.65655e-77
S100a10	2.54296e-81	0.306166	0.189	0.101	3.89582e-77
Csf1	2.60512e-81	0.274448	0.217	0.119	3.99105e-77
Agps	4.67422e-81	-0.180772	0.323	0.421	7.1609e-77
B4galt4	5.85493e-81	-0.174054	0.345	0.456	8.96976e-77
Gprasp2	6.01309e-81	-0.107556	0.052	0.127	9.21206e-77
Tubgcp5	6.47605e-81	-0.206592	0.401	0.502	9.92131e-77
Prag1	6.76103e-81	-0.145508	0.135	0.234	1.03579e-76
Tcf7l2	7.58834e-81	-0.186236	0.209	0.313	1.16253e-76
Xiap	1.23894e-80	-0.190409	0.411	0.508	1.89805e-76
Gm2000	1.87888e-80	0.0982184	0.185	0.093	2.87845e-76
Ttc28	2.03141e-80	-0.192004	0.371	0.466	3.11212e-76
Cars	2.10779e-80	-0.136846	0.089	0.17	3.22913e-76
Erf	2.64659e-80	-0.15942	0.211	0.312	4.05457e-76
Irf8	3.16465e-80	-0.162882	0.847	0.893	4.84825e-76
Cenpx	3.16477e-80	0.19794	0.534	0.435	4.84843e-76
Setd5	4.36072e-80	-0.19696	0.4	0.503	6.68063e-76
Il6ra	5.74867e-80	-0.172322	0.709	0.773	8.80697e-76
Ndufa3	1.32713e-79	0.195213	0.577	0.468	2.03317e-75
Dnajb9	1.55629e-79	-0.171261	0.328	0.438	2.38423e-75
Serpinf1	1.98753e-79	-0.177274	0.246	0.344	3.04489e-75
Emc3	2.32494e-79	-0.172836	0.471	0.563	3.5618e-75
Snrpg	2.46313e-79	0.180854	0.514	0.393	3.77352e-75
Tnrc6b	2.48566e-79	-0.197844	0.492	0.575	3.80803e-75
Nfia	2.73423e-79	-0.186972	0.269	0.368	4.18884e-75
Adprh	3.29197e-79	-0.158623	0.433	0.523	5.04329e-75
Itga9	3.45944e-79	-0.15343	0.172	0.272	5.29986e-75
Ndufa2	5.55739e-79	0.182938	0.703	0.626	8.51392e-75
Oaf	5.95402e-79	-0.131947	0.117	0.2	9.12156e-75
Cox7b	9.20248e-79	0.190518	0.621	0.538	1.40982e-74
Lman1	9.35771e-79	-0.169062	0.515	0.601	1.4336e-74
Smad1	9.98567e-79	-0.161433	0.212	0.319	1.52981e-74
Zfp715	1.34697e-78	-0.142856	0.135	0.235	2.06357e-74
Incenp	1.49693e-78	0.153718	0.125	0.054	2.2933e-74
Morf4l1	1.84125e-78	-0.144522	0.853	0.875	2.82079e-74
Zeb1	2.21328e-78	-0.166123	0.172	0.273	3.39074e-74
Kcnk13	2.40229e-78	-0.165577	0.348	0.448	3.6803e-74
Uqcrfs1	3.70335e-78	0.182406	0.557	0.443	5.67353e-74
Scpep1	3.86724e-78	0.152968	0.415	0.289	5.92461e-74
St6galnac4	3.89718e-78	-0.17596	0.502	0.597	5.97048e-74
Ctnnd1	4.90894e-78	-0.13988	0.16	0.26	7.52049e-74
Atp6v0a1	5.20707e-78	-0.189026	0.285	0.389	7.97723e-74
Gltp	1.20829e-77	0.178404	0.625	0.513	1.85109e-73
Cyp4f13	1.20897e-77	-0.155329	0.182	0.292	1.85215e-73
Arhgap12	1.24358e-77	-0.182217	0.359	0.462	1.90517e-73
Sppl2a	1.32936e-77	-0.166135	0.624	0.688	2.03658e-73
Lcp1	1.36177e-77	-0.1752	0.816	0.86	2.08623e-73
Pdzd8	1.81534e-77	-0.181929	0.252	0.36	2.78111e-73
Zc3h12a	3.28703e-77	0.155177	0.252	0.148	5.03572e-73
Atp6v1f	3.91975e-77	0.168233	0.804	0.754	6.00505e-73
Kat6a	4.007e-77	-0.190461	0.385	0.474	6.13872e-73
S100a11	5.09077e-77	0.327927	0.122	0.055	7.79906e-73
Btg1	5.67189e-77	0.230147	0.861	0.839	8.68934e-73
Psmd7	7.31111e-77	-0.172725	0.428	0.52	1.12006e-72
Ube3a	1.07146e-76	-0.198422	0.441	0.524	1.64148e-72
Cd48	1.14061e-76	0.205461	0.662	0.557	1.74741e-72
Gm37494	1.17793e-76	-0.190718	0.221	0.331	1.80459e-72
Ucp2	1.5064e-76	0.150736	0.834	0.807	2.3078e-72
Mars	1.73754e-76	-0.136882	0.15	0.239	2.6619e-72
Gabbr1	1.76245e-76	-0.164525	0.239	0.353	2.70007e-72
Sipa1l1	1.89848e-76	-0.170798	0.227	0.33	2.90846e-72
Elob	2.37829e-76	0.179492	0.726	0.682	3.64354e-72
Gspt1	2.39567e-76	-0.167246	0.621	0.682	3.67016e-72
Prdx5	3.53465e-76	0.204758	0.782	0.733	5.41508e-72
Map3k8	3.57499e-76	0.138667	0.279	0.171	5.47688e-72
Hlf	3.86942e-76	-0.101641	0.04	0.106	5.92795e-72
Klhl9	4.46218e-76	-0.159396	0.292	0.398	6.83606e-72
Mvb12b	6.7733e-76	-0.172902	0.236	0.337	1.03767e-71
Tmed5	8.63179e-76	-0.161615	0.688	0.761	1.32239e-71
Zfp445	1.67557e-75	-0.192009	0.233	0.337	2.56698e-71
Mknk1	2.83942e-75	-0.173353	0.364	0.467	4.35e-71
Glul	2.98577e-75	-0.20065	0.832	0.878	4.5742e-71
Dnajc3	3.71943e-75	-0.174393	0.574	0.647	5.69817e-71
Tmem33	3.97408e-75	-0.159065	0.454	0.544	6.08829e-71
Nudcd3	4.91249e-75	-0.182301	0.298	0.397	7.52593e-71
Eif5a	5.25707e-75	0.175505	0.755	0.748	8.05383e-71
Bex3	5.91636e-75	0.107784	0.172	0.086	9.06387e-71
Tra2b	7.4584e-75	-0.192421	0.548	0.642	1.14263e-70
Arhgap15	7.91841e-75	0.107676	0.122	0.051	1.2131e-70
Mapkapk2	8.03871e-75	0.220454	0.442	0.351	1.23153e-70
Mt1	1.3519e-74	0.282223	0.625	0.53	2.07111e-70
Abcd3	1.74055e-74	-0.148478	0.182	0.279	2.66652e-70
Milr1	2.17744e-74	0.143687	0.258	0.154	3.33584e-70
Sesn1	2.69863e-74	-0.15448	0.222	0.322	4.1343e-70
Akap9	2.766e-74	-0.201342	0.463	0.536	4.23752e-70
Ktn1	2.97134e-74	-0.2076	0.41	0.5	4.55209e-70
Dennd2c	3.03435e-74	-0.109942	0.062	0.137	4.64863e-70
Matk	3.30106e-74	-0.152889	0.25	0.362	5.05722e-70
Sri	3.72556e-74	0.169814	0.562	0.448	5.70756e-70
Ptbp3	4.11372e-74	-0.165968	0.606	0.668	6.30222e-70
H2-Q4	4.1839e-74	0.148925	0.285	0.177	6.40974e-70
Tomm7	6.02655e-74	0.178759	0.653	0.566	9.23267e-70
Ociad1	9.08948e-74	-0.159623	0.476	0.562	1.39251e-69
Smdt1	1.48328e-73	0.18434	0.653	0.584	2.27238e-69
Cox7a2	2.94099e-73	0.181465	0.689	0.622	4.5056e-69
Rell1	3.69272e-73	0.0996314	0.117	0.048	5.65724e-69
Ggt5	6.07312e-73	-0.156568	0.184	0.279	9.30402e-69
Stt3a	6.23882e-73	-0.160107	0.358	0.451	9.55787e-69
Atp5g3	7.76421e-73	0.183336	0.498	0.39	1.18948e-68
Ralgps2	1.04673e-72	-0.184394	0.225	0.319	1.60359e-68
Ddost	2.02731e-72	0.153298	0.705	0.666	3.10584e-68
Hist1h2ap	4.1877e-72	0.249055	0.109	0.065	6.41555e-68
Hmgn2	4.47825e-72	0.217392	0.373	0.326	6.86068e-68
Krcc1	9.99719e-72	-0.159529	0.55	0.619	1.53157e-67
Zranb2	1.12603e-71	-0.18117	0.411	0.502	1.72508e-67
G6pc3	1.88098e-71	-0.140322	0.199	0.291	2.88166e-67
Snx13	2.17885e-71	-0.157827	0.22	0.318	3.338e-67
Rnf145	2.30806e-71	-0.142838	0.152	0.249	3.53595e-67
Rassf2	2.35131e-71	-0.172131	0.437	0.545	3.6022e-67
Dennd1c	2.87712e-71	-0.150784	0.167	0.268	4.40775e-67
Tspan3	4.8343e-71	-0.15943	0.502	0.583	7.40615e-67
Bptf	5.01862e-71	-0.184092	0.53	0.606	7.68853e-67
Arhgap17	8.30677e-71	-0.180422	0.581	0.665	1.2726e-66
Tln2	8.57903e-71	-0.15838	0.204	0.309	1.31431e-66
Gns	9.79088e-71	-0.147152	0.745	0.805	1.49996e-66
2810474O19Rik	1.14955e-70	-0.200273	0.446	0.538	1.76111e-66
Gm30329	1.38247e-70	-0.108985	0.06	0.13	2.11795e-66
Bmpr2	1.62874e-70	-0.173514	0.351	0.454	2.49523e-66
BC031181	1.76344e-70	-0.144877	0.492	0.565	2.70159e-66
Vcam1	2.34751e-70	0.133006	0.144	0.068	3.59639e-66
B130006D01Rik	2.46801e-70	-0.110395	0.048	0.115	3.78099e-66
Stambpl1	3.21803e-70	-0.135087	0.153	0.246	4.93003e-66
Zfp740	3.89068e-70	-0.15733	0.268	0.376	5.96053e-66
Tpbgl	3.90692e-70	-0.146036	0.179	0.276	5.9854e-66
Zfp292	4.36698e-70	-0.1928	0.469	0.547	6.69021e-66
Hscb	8.90386e-70	0.134624	0.273	0.17	1.36407e-65
Snrpf	9.35972e-70	0.174176	0.54	0.44	1.43391e-65
Tnf	9.42724e-70	0.347195	0.323	0.216	1.44425e-65
Pum2	1.04848e-69	-0.17368	0.421	0.499	1.60627e-65
Tet3	1.2569e-69	-0.188185	0.327	0.422	1.92557e-65
A630001G21Rik	2.2063e-69	-0.167103	0.232	0.33	3.38006e-65
Pex2	2.22617e-69	-0.145663	0.343	0.437	3.41049e-65
Edem2	2.35304e-69	-0.146946	0.581	0.648	3.60485e-65
Irgm2	2.38951e-69	-0.111051	0.084	0.165	3.66074e-65
Clip1	3.49123e-69	-0.180027	0.469	0.553	5.34856e-65
Sqor	3.59169e-69	-0.15404	0.333	0.436	5.50247e-65
Tal1	3.69961e-69	-0.125681	0.078	0.154	5.6678e-65
Atp5o.1	4.25693e-69	0.17789	0.597	0.516	6.52162e-65
Slc24a3	4.34108e-69	-0.0945788	0.046	0.112	6.65054e-65
Man1a	4.56026e-69	-0.16435	0.453	0.544	6.98632e-65
Slc35c2	5.03683e-69	-0.159327	0.387	0.47	7.71642e-65
Igfbp4	5.37004e-69	0.118706	0.253	0.153	8.22691e-65
Ythdf3	5.84242e-69	-0.157107	0.241	0.331	8.95059e-65
Itga6	7.03718e-69	-0.166004	0.63	0.707	1.0781e-64
Morc2a	7.74723e-69	-0.110665	0.072	0.148	1.18688e-64
Srsf2	7.92289e-69	-0.179189	0.616	0.709	1.21379e-64
Man2b1	1.4973e-68	0.145228	0.92	0.927	2.29386e-64
Snhg6	1.73203e-68	0.0994383	0.214	0.122	2.65348e-64
Pgk1	2.4216e-68	0.18285	0.473	0.37	3.70989e-64
Ubn2	2.53464e-68	-0.195549	0.459	0.543	3.88307e-64
2020-03-02	2.59477e-68	-0.143733	0.569	0.637	3.97519e-64
Igbp1	4.06412e-68	0.164416	0.497	0.383	6.22623e-64
Grn	4.44912e-68	0.142487	0.925	0.931	6.81604e-64
Dok1	4.89815e-68	-0.147317	0.292	0.394	7.50396e-64
Lrrc58	6.72007e-68	-0.161582	0.293	0.379	1.02952e-63
Hspa8	9.59539e-68	0.153653	0.961	0.949	1.47001e-63
Tuba1b	1.21862e-67	0.13991	0.579	0.653	1.86693e-63
Pak2	1.23303e-67	-0.153311	0.67	0.719	1.889e-63
Kmt5b	1.53867e-67	-0.180294	0.308	0.407	2.35724e-63
Tmem135	2.21015e-67	-0.163694	0.336	0.431	3.38596e-63
Ethe1	2.43367e-67	0.123296	0.241	0.145	3.72839e-63
Itch	2.49281e-67	-0.169929	0.472	0.556	3.81899e-63
Pcbp2	2.53426e-67	0.155601	0.7	0.61	3.88249e-63
Lasp1	2.76176e-67	-0.147264	0.316	0.403	4.23102e-63
Gmpr2	2.88745e-67	-0.152319	0.336	0.428	4.42357e-63
Tmem144	3.12695e-67	-0.140435	0.17	0.265	4.79049e-63
Slc39a7	3.56829e-67	-0.15732	0.379	0.47	5.46662e-63
Peli1	3.65019e-67	-0.171497	0.447	0.538	5.5921e-63
Etnk1	3.6956e-67	-0.175333	0.416	0.509	5.66166e-63
Myo1g	4.2011e-67	0.0673822	0.209	0.122	6.43608e-63
Hsd17b11	4.24943e-67	-0.148512	0.469	0.561	6.51013e-63
Sar1b	4.4158e-67	-0.139327	0.463	0.548	6.76501e-63
Mdfi	8.78381e-67	-0.0928599	0.05	0.115	1.34568e-62
Tmx2	1.13042e-66	-0.137101	0.193	0.283	1.7318e-62
Ppp1r3b	1.48019e-66	-0.129727	0.119	0.205	2.26766e-62
Fosl2	1.48378e-66	0.149039	0.151	0.076	2.27315e-62
Pnn	1.88081e-66	-0.187856	0.536	0.61	2.88141e-62
Scaf11	2.38717e-66	-0.160545	0.623	0.678	3.65715e-62
Adora3	2.55476e-66	-0.165824	0.415	0.511	3.91389e-62
Kpnb1	2.97245e-66	-0.156033	0.35	0.435	4.5538e-62
Cers2	3.2951e-66	-0.15075	0.477	0.552	5.04809e-62
Uba5	3.66456e-66	-0.155973	0.262	0.344	5.61411e-62
Rrp1b	4.273e-66	-0.134246	0.126	0.202	6.54624e-62
Adap1	4.59827e-66	0.0820102	0.158	0.081	7.04454e-62
Hs6st1	5.62866e-66	-0.150211	0.211	0.307	8.6231e-62
Actn1	6.39342e-66	-0.110816	0.073	0.138	9.79471e-62
Asap1	6.5896e-66	-0.164895	0.571	0.635	1.00953e-61
Snx24	6.6903e-66	-0.156549	0.259	0.355	1.02495e-61
Zfp532	7.59082e-66	-0.139087	0.097	0.176	1.16291e-61
Yipf5	1.13365e-65	-0.141049	0.232	0.324	1.73676e-61
Coq10b	1.15876e-65	0.185188	0.44	0.326	1.77522e-61
Mymk	1.29232e-65	-0.0967994	0.046	0.107	1.97983e-61
Tmem63a	1.32393e-65	-0.1537	0.328	0.416	2.02826e-61
Washc4	1.43668e-65	-0.171315	0.431	0.509	2.20099e-61
Atpif1	1.54902e-65	0.175258	0.743	0.699	2.3731e-61
Msl2	1.66234e-65	-0.163823	0.239	0.337	2.5467e-61
Slc25a11	1.84703e-65	-0.143448	0.565	0.624	2.82964e-61
Accs	2.50769e-65	-0.148199	0.193	0.292	3.84179e-61
mt-Nd2	2.62333e-65	-0.160676	0.957	0.967	4.01895e-61
Ccl9	2.6754e-65	-0.217499	0.34	0.43	4.09871e-61
Tnpo1	3.2827e-65	-0.160893	0.29	0.38	5.0291e-61
Ash1l	4.40968e-65	-0.193333	0.506	0.572	6.75563e-61
Rasal3	4.9428e-65	-0.163235	0.417	0.509	7.57236e-61
Pmf1	5.26774e-65	0.0819282	0.129	0.06	8.07017e-61
D8Ertd738e	7.65102e-65	0.17363	0.703	0.626	1.17214e-60
Il16	7.75761e-65	-0.150604	0.365	0.472	1.18847e-60
Fam53b	7.90918e-65	-0.159576	0.296	0.395	1.21169e-60
BC017643	8.29098e-65	-0.145814	0.405	0.492	1.27018e-60
Cdkn2d	1.17555e-64	0.147574	0.167	0.093	1.80094e-60
Ncoa4	1.31117e-64	-0.153708	0.339	0.426	2.00871e-60
Rsbn1	1.51797e-64	-0.155794	0.268	0.363	2.32553e-60
Arf1	1.60187e-64	-0.140508	0.795	0.844	2.45406e-60
Ddrgk1	1.70587e-64	-0.139769	0.612	0.672	2.6134e-60
Rac2	1.71074e-64	0.194514	0.667	0.607	2.62085e-60
H2-Q6	2.31352e-64	0.0745901	0.112	0.049	3.54431e-60
Zbtb38	2.7048e-64	-0.163288	0.242	0.336	4.14376e-60
Olfml2b	3.10087e-64	-0.106531	0.097	0.169	4.75054e-60
Zfp148	3.42451e-64	-0.162277	0.365	0.447	5.24636e-60
Evi2a	4.49742e-64	-0.151967	0.75	0.807	6.89005e-60
Pxk	4.90077e-64	-0.156837	0.273	0.367	7.50799e-60
Pirb	5.57639e-64	0.160833	0.222	0.136	8.54303e-60
Tnrc6a	6.9906e-64	-0.183007	0.331	0.421	1.07096e-59
Nckap5l	8.10688e-64	-0.126891	0.149	0.236	1.24197e-59
Polr1a	8.51866e-64	-0.131122	0.117	0.197	1.30506e-59
Lpxn	9.12198e-64	-0.142823	0.308	0.391	1.39749e-59
Hacd4	1.1261e-63	0.145623	0.403	0.291	1.72519e-59
Rhoq	1.31517e-63	-0.154648	0.329	0.431	2.01483e-59
Helz	1.35503e-63	-0.173474	0.271	0.36	2.07591e-59
Irf5	1.42689e-63	-0.14961	0.611	0.671	2.186e-59
Rgl1	1.569e-63	-0.144065	0.189	0.282	2.40371e-59
Bicd2	1.61498e-63	-0.153512	0.299	0.388	2.47416e-59
Gas6	1.7291e-63	-0.167284	0.457	0.57	2.64898e-59
Slc46a1	1.96469e-63	-0.147093	0.199	0.272	3.00991e-59
Cmc2	2.10103e-63	0.0956423	0.169	0.09	3.21878e-59
Nedd8	2.25668e-63	0.159257	0.726	0.674	3.45723e-59
Kcnq1ot1	2.45979e-63	-0.296809	0.3	0.391	3.76839e-59
Sbds	2.46832e-63	-0.145597	0.345	0.441	3.78147e-59
Dopey2	3.06995e-63	-0.140044	0.173	0.265	4.70316e-59
Nfkb1	3.07339e-63	-0.15901	0.551	0.63	4.70843e-59
Rbmx	3.08994e-63	-0.14022	0.122	0.204	4.73379e-59
Cd3eap	3.39252e-63	-0.134631	0.185	0.282	5.19733e-59
Ndufa6	3.5347e-63	0.170775	0.699	0.61	5.41517e-59
Ccl2	3.92611e-63	0.385416	0.246	0.151	6.0148e-59
Hmg20a	4.5551e-63	-0.157608	0.193	0.287	6.97841e-59
Pacsin2	5.38417e-63	-0.150269	0.463	0.541	8.24856e-59
Scamp1	5.43889e-63	-0.124934	0.161	0.252	8.33238e-59
Atxn7l3b	5.57332e-63	-0.155337	0.546	0.613	8.53832e-59
Gimap1	7.83746e-63	-0.110276	0.133	0.221	1.2007e-58
Yipf4	8.19403e-63	-0.13473	0.468	0.547	1.25532e-58
Zfp518a	8.80627e-63	-0.117367	0.12	0.207	1.34912e-58
Trim26	9.11854e-63	-0.158547	0.321	0.416	1.39696e-58
Mrpl33	1.0324e-62	0.17929	0.436	0.334	1.58163e-58
Syngr2	1.4316e-62	-0.14669	0.695	0.753	2.19322e-58
Arhgap27	2.16703e-62	-0.141667	0.236	0.332	3.31988e-58
Gla	2.66575e-62	0.0790366	0.103	0.042	4.08393e-58
Tsc22d2	2.80542e-62	-0.269167	0.439	0.508	4.2979e-58
Zfp62	2.97006e-62	-0.161714	0.287	0.383	4.55013e-58
Akirin2	3.27177e-62	-0.14363	0.649	0.707	5.01236e-58
Pxn	3.51651e-62	-0.142637	0.212	0.301	5.38729e-58
Snx29	3.51787e-62	-0.180812	0.366	0.468	5.38938e-58
Nhsl2	3.62159e-62	-0.094269	0.057	0.125	5.54828e-58
Nfix	4.20787e-62	-0.164522	0.363	0.448	6.44645e-58
Pcmtd1	4.39772e-62	-0.160008	0.321	0.421	6.7373e-58
Fam91a1	5.80594e-62	-0.16145	0.44	0.529	8.8947e-58
Map1s	6.18669e-62	-0.153262	0.211	0.3	9.47801e-58
Ndufa13	6.18973e-62	0.15419	0.777	0.726	9.48267e-58
Lpcat1	6.86556e-62	-0.157556	0.322	0.417	1.0518e-57
Rhobtb1	7.3501e-62	-0.144649	0.18	0.274	1.12604e-57
Cib1	8.20512e-62	-0.141684	0.336	0.429	1.25702e-57
Bbc3	1.0402e-61	0.108006	0.209	0.122	1.59359e-57
Ifi209	1.24142e-61	0.113745	0.113	0.05	1.90185e-57
Slc26a2	1.5104e-61	-0.138987	0.162	0.246	2.31393e-57
Plcg2	1.76523e-61	-0.151839	0.328	0.411	2.70434e-57
Aamp	2.1992e-61	-0.143124	0.477	0.555	3.36918e-57
Alox5	2.20844e-61	-0.0814186	0.05	0.111	3.38333e-57
Pecr	2.73427e-61	-0.123763	0.187	0.282	4.18891e-57
Fam120b	5.41867e-61	-0.141804	0.181	0.274	8.3014e-57
Lcp2	6.88166e-61	-0.159217	0.413	0.5	1.05427e-56
Klhl7	8.10713e-61	-0.129577	0.205	0.298	1.24201e-56
Yae1d1	9.53113e-61	-0.140397	0.235	0.321	1.46017e-56
Tm9sf3	1.03608e-60	-0.137808	0.717	0.765	1.58727e-56
Phip	1.1628e-60	-0.193852	0.477	0.559	1.78141e-56
Junb	1.17985e-60	0.129501	0.905	0.871	1.80753e-56
Jagn1	1.19305e-60	-0.131638	0.26	0.35	1.82776e-56
Atad1	1.2387e-60	-0.127312	0.245	0.339	1.89768e-56
Tia1	1.2571e-60	-0.179673	0.331	0.416	1.92587e-56
Eef1d	1.32093e-60	0.145541	0.837	0.792	2.02366e-56
Pde4b	1.44033e-60	0.139839	0.229	0.141	2.20659e-56
Cnot8	3.70063e-60	-0.137365	0.345	0.432	5.66937e-56
Trpm4	4.05837e-60	-0.128854	0.123	0.201	6.21743e-56
Ndufb9	4.87766e-60	0.160356	0.687	0.615	7.47258e-56
Dmtf1	4.98757e-60	-0.172051	0.262	0.351	7.64095e-56
Csad	5.17041e-60	-0.159586	0.28	0.375	7.92107e-56
Prkce	8.46408e-60	-0.110274	0.083	0.156	1.2967e-55
Sod1	9.62472e-60	0.122289	0.356	0.25	1.47451e-55
Lrch1	1.01284e-59	-0.145861	0.187	0.271	1.55168e-55
Ftl1-ps1	1.55213e-59	0.11168	0.287	0.189	2.37786e-55
Ggh	2.16947e-59	0.157951	0.526	0.419	3.32362e-55
Lgmn	2.51323e-59	-0.112529	0.946	0.964	3.85027e-55
Coro1a	2.75051e-59	0.157601	0.877	0.869	4.21378e-55
Ufl1	2.7842e-59	-0.151002	0.283	0.375	4.26539e-55
Gp9	2.91865e-59	-0.1365	0.212	0.3	4.47137e-55
Ptpra	3.06555e-59	-0.15013	0.653	0.715	4.69642e-55
Lamp1	3.08988e-59	0.140235	0.955	0.947	4.7337e-55
Ckb	3.47661e-59	-0.114575	0.895	0.922	5.32616e-55
Fam45a	3.47832e-59	-0.130939	0.191	0.281	5.32878e-55
Cdc37l1	3.70572e-59	-0.167996	0.258	0.346	5.67717e-55
Mical3	3.9634e-59	-0.115609	0.078	0.147	6.07192e-55
Rac1	4.76341e-59	-0.122486	0.821	0.853	7.29755e-55
Sh2b2	5.0442e-59	-0.138168	0.145	0.22	7.72771e-55
Smpd5	5.14951e-59	-0.101856	0.068	0.132	7.88906e-55
Tiprl	5.67893e-59	-0.134699	0.32	0.41	8.70012e-55
Plscr3	6.13996e-59	-0.130239	0.195	0.282	9.40641e-55
Zfp871	6.35476e-59	-0.158428	0.269	0.356	9.7355e-55
Emc7	1.07267e-58	-0.139495	0.549	0.625	1.64333e-54
Pla2g4a	1.59995e-58	-0.149061	0.272	0.356	2.45112e-54
Lactb	1.61133e-58	-0.149521	0.41	0.489	2.46856e-54
Atp6ap2	1.78396e-58	-0.127247	0.719	0.769	2.73303e-54
Trpc4ap	2.26794e-58	-0.152412	0.455	0.523	3.47448e-54
Csrnp1	2.29379e-58	0.136775	0.237	0.147	3.51408e-54
Cfh	2.5838e-58	-0.124544	0.861	0.903	3.95838e-54
Gapvd1	2.96648e-58	-0.161769	0.36	0.437	4.54465e-54
Gm10138	3.00654e-58	-0.164256	0.19	0.275	4.60602e-54
Ptgr1	3.32177e-58	0.0690339	0.125	0.061	5.08896e-54
Carhsp1	3.33453e-58	0.062742	0.111	0.051	5.1085e-54
Wnk1	3.5435e-58	-0.154909	0.815	0.851	5.42864e-54
Ankrd10	4.81965e-58	-0.153227	0.235	0.324	7.3837e-54
Ptma	5.09982e-58	0.184692	0.935	0.936	7.81293e-54
Eif4b	5.94886e-58	0.151557	0.559	0.451	9.11365e-54
Tbc1d5	8.54951e-58	-0.160652	0.304	0.391	1.30978e-53
Rab6b	1.02259e-57	-0.14293	0.334	0.435	1.56661e-53
Gsn	1.34552e-57	0.0926669	0.102	0.044	2.06133e-53
Pdia5	1.58227e-57	0.079837	0.148	0.078	2.42404e-53
Camsap1	1.90461e-57	-0.131553	0.151	0.237	2.91787e-53
Arhgap4	2.21297e-57	-0.155269	0.24	0.326	3.39027e-53
Fam208b	3.01182e-57	-0.132677	0.159	0.247	4.61411e-53
Msl1	3.32643e-57	-0.149289	0.337	0.414	5.09609e-53
Ms4a6d	3.35084e-57	-0.139486	0.51	0.589	5.13349e-53
Tab2	3.35497e-57	-0.155794	0.498	0.564	5.13982e-53
Nfil3	3.56177e-57	0.117143	0.108	0.049	5.45663e-53
Mindy2	6.51985e-57	-0.146687	0.478	0.54	9.98841e-53
P2rx7	8.11734e-57	-0.158611	0.352	0.436	1.24358e-52
Diaph1	8.26419e-57	0.114898	0.246	0.156	1.26607e-52
Cc2d1b	9.42081e-57	-0.117378	0.147	0.23	1.44327e-52
Slmap	1.06503e-56	-0.152636	0.324	0.411	1.63163e-52
Cd14	1.11241e-56	0.302963	0.781	0.775	1.70421e-52
Ptprj	1.30074e-56	-0.151165	0.373	0.456	1.99274e-52
Kansl1	1.38799e-56	-0.151809	0.378	0.453	2.12639e-52
Bst2	1.39017e-56	0.208973	0.695	0.635	2.12975e-52
Bend6	1.56165e-56	-0.116163	0.102	0.176	2.39245e-52
Spg20	1.94389e-56	-0.134629	0.224	0.313	2.97805e-52
Mark3	1.95248e-56	-0.159355	0.361	0.444	2.9912e-52
Vgll4	2.01686e-56	-0.151605	0.526	0.609	3.08982e-52
Lipa	2.23846e-56	-0.1444	0.416	0.496	3.42931e-52
Mcm6	2.32425e-56	0.103417	0.114	0.055	3.56075e-52
Sipa1l2	2.447e-56	-0.147818	0.28	0.371	3.7488e-52
Mtfr1l	2.7338e-56	-0.139478	0.373	0.446	4.18819e-52
Cd151	2.80123e-56	-0.13412	0.284	0.368	4.29149e-52
Lactb2	3.28903e-56	-0.141413	0.241	0.33	5.0388e-52
Rp2	3.85913e-56	-0.142485	0.467	0.534	5.91219e-52
Trp53i11	4.15098e-56	-0.0797389	0.046	0.103	6.3593e-52
Rbm4b	4.24873e-56	-0.13634	0.155	0.236	6.50905e-52
Sla	4.38374e-56	-0.146055	0.446	0.526	6.71589e-52
mt-Co2	5.74125e-56	0.0902508	0.979	0.977	8.7956e-52
Srrm1	6.19094e-56	-0.154683	0.629	0.687	9.48452e-52
Tlr7	6.30311e-56	-0.140246	0.364	0.46	9.65636e-52
Jade2	6.32096e-56	-0.119281	0.144	0.231	9.68372e-52
Mgst3	6.7443e-56	0.101238	0.231	0.144	1.03323e-51
Selenot	7.24948e-56	-0.129721	0.472	0.537	1.11062e-51
Tifab	8.41554e-56	-0.146849	0.416	0.5	1.28926e-51
Nudt16l1	1.02578e-55	-0.128449	0.243	0.32	1.57149e-51
Sp100	1.0424e-55	0.110767	0.197	0.116	1.59695e-51
Dtx3	1.16329e-55	-0.107643	0.124	0.206	1.78216e-51
P2ry6	1.24875e-55	-0.15304	0.683	0.736	1.91309e-51
Sec31a	1.30949e-55	-0.137437	0.287	0.371	2.00614e-51
Gdf15	1.32878e-55	0.401674	0.168	0.094	2.03568e-51
Tma7	1.4162e-55	0.150436	0.705	0.661	2.16962e-51
Ykt6	1.64929e-55	-0.134524	0.23	0.305	2.52672e-51
Tmem256	1.69445e-55	0.150646	0.518	0.415	2.59589e-51
Atp5g1	1.70889e-55	0.162704	0.655	0.611	2.61802e-51
Dynll1	2.45556e-55	0.16372	0.684	0.63	3.76192e-51
Dbf4	2.48424e-55	0.0964467	0.124	0.06	3.80586e-51
Sppl3	2.50273e-55	-0.141567	0.326	0.408	3.83418e-51
Gmeb1	2.57221e-55	-0.126253	0.142	0.216	3.94063e-51
Gsk3b	2.76842e-55	-0.149497	0.512	0.583	4.24122e-51
Krit1	3.34735e-55	-0.16417	0.384	0.465	5.12814e-51
Zfp24	3.41057e-55	-0.128404	0.191	0.273	5.225e-51
Rreb1	4.2416e-55	-0.160127	0.328	0.408	6.49813e-51
Mlec	4.76316e-55	-0.153612	0.586	0.651	7.29716e-51
Lrif1	4.90089e-55	-0.143905	0.187	0.275	7.50817e-51
Lgals8	5.56522e-55	-0.135031	0.296	0.389	8.52592e-51
Tmed9	5.89814e-55	-0.121203	0.801	0.838	9.03595e-51
Fyco1	7.47788e-55	-0.139524	0.186	0.274	1.14561e-50
Acss1	8.23335e-55	-0.122851	0.147	0.225	1.26135e-50
Pknox1	9.87473e-55	-0.142223	0.163	0.246	1.51281e-50
Spry1	1.0037e-54	-0.136857	0.082	0.148	1.53767e-50
Dok3	1.16591e-54	-0.124937	0.151	0.229	1.78617e-50
Hspb11	1.27653e-54	0.0970086	0.193	0.114	1.95564e-50
Dlgap4	1.40077e-54	-0.146596	0.306	0.39	2.14598e-50
Tvp23b	1.4518e-54	-0.125841	0.291	0.383	2.22416e-50
Taok1	1.51325e-54	-0.153566	0.437	0.502	2.3183e-50
Cnpy3	1.52674e-54	-0.135226	0.532	0.598	2.33896e-50
Xrcc5	1.54661e-54	-0.0934533	0.062	0.12	2.36941e-50
Mpeg1	1.96951e-54	0.164315	0.912	0.904	3.01729e-50
Larp4	2.10513e-54	-0.144213	0.301	0.379	3.22506e-50
Zfp703	2.10851e-54	-0.12744	0.202	0.286	3.23024e-50
Disc1	2.11875e-54	-0.125228	0.121	0.192	3.24592e-50
Tgfbrap1	2.23608e-54	-0.123993	0.164	0.248	3.42567e-50
Edem1	2.72194e-54	-0.148724	0.537	0.6	4.17001e-50
Mon2	2.94388e-54	-0.152043	0.291	0.376	4.51003e-50
Ctsl	3.00427e-54	0.177292	0.925	0.935	4.60254e-50
Rpl7l1	3.13364e-54	-0.128083	0.404	0.482	4.80074e-50
Lmbrd1	3.99883e-54	-0.131247	0.342	0.432	6.1262e-50
Ehd4	4.24699e-54	-0.145471	0.616	0.669	6.50639e-50
Bmi1	4.5441e-54	-0.121257	0.149	0.228	6.96156e-50
Ccdc88b	4.62809e-54	-0.134339	0.229	0.313	7.09023e-50
Uqcrq	4.70469e-54	0.155675	0.635	0.58	7.20758e-50
Ankrd11	4.72114e-54	-0.157909	0.695	0.736	7.23279e-50
Stag2	4.98429e-54	-0.153401	0.452	0.519	7.63593e-50
Spcs2	5.5589e-54	-0.110086	0.838	0.86	8.51623e-50
Irf2	5.61714e-54	-0.143925	0.598	0.66	8.60546e-50
Larp1	5.92949e-54	-0.14478	0.312	0.391	9.08398e-50
Dusp1	7.13375e-54	0.0606185	0.49	0.386	1.09289e-49
Rybp	7.51383e-54	-0.106414	0.102	0.171	1.15112e-49
Tnfrsf1a	1.08297e-53	-0.128738	0.553	0.616	1.65911e-49
Borcs8	1.16099e-53	0.0853282	0.161	0.089	1.77864e-49
Galnt4	1.2424e-53	-0.0965205	0.088	0.158	1.90336e-49
2020-03-01	1.38378e-53	-0.147309	0.593	0.654	2.11995e-49
Fam114a2	1.94798e-53	-0.136934	0.375	0.434	2.9843e-49
Ctsd	1.96107e-53	-0.0301778	0.976	0.988	3.00437e-49
Fam117b	2.08081e-53	-0.145307	0.332	0.418	3.1878e-49
Acvr1	2.0982e-53	-0.112994	0.14	0.212	3.21444e-49
Nxf1	2.31638e-53	-0.143594	0.388	0.467	3.54869e-49
Spi1	2.58382e-53	-0.117748	0.851	0.883	3.95841e-49
Secisbp2l	3.19105e-53	-0.14556	0.305	0.381	4.88869e-49
Zcchc2	3.62734e-53	-0.127096	0.13	0.205	5.55709e-49
Mgat2	4.07982e-53	-0.132049	0.432	0.509	6.25029e-49
Itpripl1	4.19316e-53	-0.1315	0.254	0.34	6.42392e-49
Vasp	4.80295e-53	-0.127778	0.603	0.672	7.35813e-49
Plekha2	6.07386e-53	-0.119378	0.177	0.249	9.30515e-49
Chuk	6.77509e-53	-0.141982	0.224	0.303	1.03794e-48
Zbtb37	7.27399e-53	-0.130955	0.141	0.223	1.11437e-48
Fam3a	1.14218e-52	-0.123316	0.259	0.336	1.74982e-48
Mob4	1.33942e-52	-0.132301	0.343	0.415	2.05199e-48
Slc33a1	1.58943e-52	-0.108001	0.132	0.209	2.435e-48
Psmb8	1.63801e-52	0.14399	0.794	0.761	2.50944e-48
Fam105a	1.87448e-52	-0.0980152	0.88	0.892	2.8717e-48
2020-09-07	2.36992e-52	-0.145732	0.644	0.699	3.63072e-48
Cmtm8	2.42146e-52	-0.114964	0.182	0.267	3.70967e-48
Rnf6	2.76374e-52	-0.132561	0.257	0.344	4.23404e-48
Rab11fip2	3.0037e-52	-0.127308	0.157	0.241	4.60166e-48
Pebp1	3.14867e-52	0.154198	0.725	0.668	4.82377e-48
Selenow	3.30186e-52	0.16998	0.426	0.332	5.05845e-48
Clta	3.57567e-52	0.113941	0.947	0.941	5.47793e-48
Ptpn1	4.51621e-52	-0.136936	0.696	0.753	6.91883e-48
Npc1	5.72487e-52	-0.143386	0.456	0.535	8.7705e-48
Dnmt3a	7.74955e-52	-0.168392	0.366	0.446	1.18723e-47
Gm5086	8.81385e-52	-0.125927	0.212	0.301	1.35028e-47
Dnajc7	9.83752e-52	-0.141026	0.559	0.612	1.50711e-47
Zcchc6	9.95853e-52	-0.161513	0.515	0.57	1.52565e-47
Tmpo	1.0506e-51	0.185974	0.315	0.277	1.60951e-47
Gmip	1.079e-51	-0.152844	0.383	0.455	1.65304e-47
Magt1	1.36961e-51	-0.142354	0.542	0.598	2.09825e-47
Atraid	1.48727e-51	-0.115207	0.682	0.735	2.27849e-47
Exoc6b	1.48784e-51	-0.130372	0.139	0.217	2.27937e-47
Tyms	1.69147e-51	0.133888	0.147	0.085	2.59133e-47
Ccni	1.79594e-51	0.149353	0.683	0.623	2.75139e-47
Rb1cc1	1.96655e-51	-0.170975	0.376	0.446	3.01276e-47
Ctsz	2.20962e-51	0.152133	0.968	0.958	3.38514e-47
Kmt2e	2.34503e-51	-0.158787	0.578	0.618	3.59259e-47
Ireb2	2.46606e-51	-0.151515	0.204	0.282	3.778e-47
Large1	2.5698e-51	-0.144832	0.208	0.289	3.93694e-47
Csk	2.69345e-51	-0.126679	0.552	0.598	4.12636e-47
Casd1	2.72518e-51	-0.128153	0.222	0.307	4.17498e-47
Snrnp25	2.99842e-51	0.0613862	0.14	0.077	4.59358e-47
Zkscan3	3.33732e-51	-0.166036	0.376	0.452	5.11277e-47
Epb41l2	3.59389e-51	-0.141051	0.889	0.924	5.50584e-47
Eif2s2	3.67862e-51	-0.154637	0.607	0.665	5.63565e-47
Atp6v0e	3.89457e-51	0.137134	0.809	0.769	5.96647e-47
Ino80e	4.06969e-51	-0.129419	0.246	0.324	6.23477e-47
Tpd52	4.23796e-51	0.161256	0.614	0.524	6.49256e-47
Twf2	4.61959e-51	-0.129467	0.628	0.68	7.07722e-47
Canx	5.2043e-51	-0.117312	0.841	0.865	7.97299e-47
Cd47	5.91366e-51	-0.115853	0.687	0.745	9.05972e-47
Eml4	5.96099e-51	-0.152016	0.412	0.474	9.13224e-47
Ankfy1	7.12722e-51	-0.145003	0.25	0.327	1.09189e-46
Yars	7.50675e-51	-0.10489	0.102	0.166	1.15003e-46
Txndc11	7.79111e-51	-0.132636	0.18	0.255	1.1936e-46
Vcp	8.28161e-51	-0.135379	0.584	0.653	1.26874e-46
Pja2	9.92295e-51	-0.126365	0.253	0.34	1.5202e-46
Cdk6	1.02172e-50	-0.158298	0.254	0.317	1.56527e-46
AY036118	1.10629e-50	-0.218576	0.372	0.47	1.69484e-46
Actr2	1.22492e-50	-0.123669	0.757	0.805	1.87658e-46
Rsrc2	1.49617e-50	-0.144968	0.63	0.682	2.29213e-46
Siah1a	1.73521e-50	-0.118723	0.168	0.246	2.65834e-46
Atf7ip	2.7805e-50	-0.154881	0.382	0.467	4.25972e-46
Tle4	3.00495e-50	-0.149033	0.312	0.394	4.60358e-46
Nop56	3.07451e-50	-0.139977	0.281	0.367	4.71015e-46
Fcho2	3.40068e-50	-0.140229	0.601	0.646	5.20984e-46
Prdx1	3.89372e-50	0.153935	0.772	0.747	5.96518e-46
Npl	4.07436e-50	-0.126691	0.307	0.383	6.24192e-46
Dock2	4.12526e-50	-0.142426	0.605	0.657	6.31989e-46
Zeb2os	4.24299e-50	-0.133283	0.523	0.581	6.50026e-46
Cwf19l2	5.51545e-50	-0.151138	0.303	0.386	8.44968e-46
Dido1	5.80653e-50	-0.136911	0.239	0.327	8.89561e-46
Tnks2	6.64833e-50	-0.137052	0.438	0.496	1.01852e-45
Pias1	7.75293e-50	-0.138016	0.29	0.375	1.18775e-45
Rbbp6	8.22495e-50	-0.156949	0.374	0.439	1.26006e-45
Ggps1	8.38269e-50	-0.124807	0.168	0.245	1.28423e-45
Akr1b10	8.49879e-50	-0.139746	0.416	0.495	1.30201e-45
Cyb5r1	9.05055e-50	-0.112524	0.165	0.247	1.38654e-45
Xpot	1.02919e-49	-0.117637	0.17	0.246	1.57672e-45
Aim2	1.13509e-49	-0.13971	0.323	0.398	1.73897e-45
Mxd1	1.56548e-49	0.168097	0.196	0.128	2.39832e-45
Phf1	1.62953e-49	-0.10558	0.133	0.211	2.49644e-45
Slco4a1	1.69369e-49	-0.0855013	0.054	0.107	2.59473e-45
Rps27rt	1.80799e-49	0.125513	0.388	0.29	2.76984e-45
Tbkbp1	1.93123e-49	-0.0838003	0.053	0.109	2.95865e-45
Uqcr11	1.96027e-49	0.147697	0.639	0.57	3.00313e-45
Rgs1	2.13325e-49	0.121376	0.639	0.537	3.26813e-45
Cnot2	2.49788e-49	-0.127497	0.347	0.414	3.82675e-45
Ep300	2.59881e-49	-0.14242	0.479	0.535	3.98137e-45
Stat6	2.81374e-49	-0.134575	0.27	0.346	4.31065e-45
Ifitm2	2.97541e-49	0.299156	0.129	0.068	4.55833e-45
Slc37a2	3.11036e-49	-0.147558	0.3	0.395	4.76507e-45
Msi2	3.30569e-49	-0.13683	0.165	0.243	5.06432e-45
Zfp638	3.78177e-49	-0.161296	0.463	0.523	5.79367e-45
Bag5	3.83859e-49	-0.114835	0.172	0.249	5.88072e-45
Gsto1	3.98548e-49	0.104258	0.238	0.155	6.10575e-45
Cct2	4.79215e-49	0.145416	0.658	0.587	7.34158e-45
Exoc5	5.29987e-49	-0.140115	0.295	0.37	8.11941e-45
Abcb4	6.51289e-49	-0.132043	0.161	0.242	9.97775e-45
Nmt1	6.66322e-49	-0.126544	0.575	0.633	1.0208e-44
Rnf139	7.17692e-49	-0.114136	0.189	0.267	1.0995e-44
Bnip3l	8.88163e-49	-0.116449	0.649	0.689	1.36067e-44
Gm17056	9.27157e-49	0.104675	0.118	0.059	1.4204e-44
Stk17b	9.77277e-49	-0.0748106	0.217	0.306	1.49719e-44
Babam2	1.18582e-48	-0.126213	0.251	0.328	1.81668e-44
B4galt6	1.22617e-48	-0.127354	0.18	0.255	1.87849e-44
Rnf130	1.37086e-48	-0.102245	0.809	0.831	2.10016e-44
Rassf5	1.57178e-48	-0.135331	0.295	0.372	2.40797e-44
B3galt5	1.69305e-48	-0.089696	0.081	0.146	2.59375e-44
B430010I23Rik	1.74163e-48	-0.159067	0.228	0.319	2.66818e-44
Cdk5rap3	1.79082e-48	-0.122846	0.254	0.332	2.74354e-44
Nsfl1c	2.24532e-48	-0.120669	0.287	0.35	3.43983e-44
BC035044	2.27149e-48	-0.128215	0.356	0.435	3.47992e-44
Cops9	2.28218e-48	0.14589	0.595	0.514	3.4963e-44
Acads	2.29261e-48	-0.126186	0.453	0.523	3.51228e-44
Yes1	2.34776e-48	-0.120964	0.147	0.223	3.59676e-44
Rfc4	2.4285e-48	0.0625393	0.101	0.048	3.72047e-44
Lat2	2.90691e-48	0.149059	0.603	0.526	4.45338e-44
Atp6v0b	2.90954e-48	-0.0984713	0.925	0.935	4.45741e-44
Rdh14	3.44925e-48	-0.111189	0.241	0.324	5.28425e-44
Arsg	3.65548e-48	-0.0944005	0.082	0.148	5.60019e-44
Fyttd1	3.98748e-48	-0.136214	0.296	0.366	6.10882e-44
Midn	4.09904e-48	-0.108436	0.119	0.187	6.27973e-44
Sorl1	4.25626e-48	0.126559	0.255	0.174	6.52059e-44
AU041133	4.60247e-48	-0.089406	0.058	0.116	7.05098e-44
Sult1a1	5.34782e-48	-0.113593	0.208	0.296	8.19286e-44
Scn1b	5.45343e-48	-0.139953	0.344	0.428	8.35466e-44
4931406C07Rik	6.65695e-48	-0.13192	0.245	0.329	1.01984e-43
Tmem175	7.67089e-48	-0.0939937	0.11	0.181	1.17518e-43
Ppp5c	7.70209e-48	-0.117577	0.231	0.3	1.17996e-43
Il7r	8.49386e-48	-0.127532	0.145	0.221	1.30126e-43
Ubxn1	9.4787e-48	0.139202	0.662	0.581	1.45214e-43
Sptbn1	1.1017e-47	0.107728	0.122	0.063	1.68781e-43
Nipa2	1.38601e-47	-0.139028	0.458	0.521	2.12337e-43
Luc7l3	1.43959e-47	-0.168045	0.447	0.521	2.20545e-43
Uqcrb	1.49655e-47	0.141191	0.697	0.644	2.29271e-43
Gfm2	1.53822e-47	-0.113804	0.131	0.203	2.35655e-43
Dnajc9	1.58713e-47	0.117038	0.162	0.096	2.43148e-43
Zmynd8	1.66126e-47	-0.150111	0.327	0.403	2.54505e-43
Gm37233	1.69471e-47	-0.0927425	0.074	0.137	2.59629e-43
Jak1	1.77844e-47	-0.111674	0.662	0.697	2.72457e-43
Nop2	1.78308e-47	-0.100217	0.103	0.161	2.73168e-43
Os9	2.33775e-47	0.150648	0.713	0.641	3.58143e-43
Tmem230	2.46015e-47	-0.117155	0.301	0.374	3.76895e-43
Aes	2.46373e-47	0.149525	0.662	0.597	3.77443e-43
Paqr7	2.46606e-47	-0.113599	0.207	0.283	3.778e-43
Birc3	2.51022e-47	0.110173	0.27	0.184	3.84566e-43
Baiap2	3.29034e-47	0.0748184	0.115	0.058	5.04081e-43
Med13l	3.42681e-47	-0.140193	0.329	0.405	5.24987e-43
Rab8b	3.44991e-47	-0.134478	0.414	0.482	5.28527e-43
Ppp1r2	3.46287e-47	-0.115112	0.387	0.455	5.30512e-43
Wdr26	3.47902e-47	-0.139828	0.527	0.587	5.32986e-43
Spcs3	3.68104e-47	-0.123705	0.318	0.388	5.63935e-43
Hist1h1e	3.82007e-47	0.24947	0.342	0.257	5.85234e-43
Papola	3.85213e-47	-0.128763	0.521	0.569	5.90147e-43
Klf12	4.5384e-47	-0.0754954	0.049	0.102	6.95283e-43
Matr3	5.91383e-47	-0.134807	0.497	0.549	9.05999e-43
Sdf4	6.00301e-47	0.141523	0.75	0.682	9.19661e-43
Tpcn1	6.57222e-47	-0.143171	0.272	0.356	1.00686e-42
Srm	6.63708e-47	-0.117603	0.212	0.287	1.0168e-42
Tmem64	6.73573e-47	-0.125309	0.219	0.298	1.03191e-42
Adcy7	6.90353e-47	-0.14857	0.307	0.382	1.05762e-42
Il18	7.19603e-47	-0.115759	0.227	0.304	1.10243e-42
Slc4a7	8.3212e-47	-0.139311	0.34	0.408	1.27481e-42
Ss18	8.71566e-47	-0.124687	0.258	0.333	1.33524e-42
Vps4b	9.27328e-47	-0.123317	0.388	0.457	1.42067e-42
Tmem185b	9.38519e-47	-0.104591	0.166	0.242	1.43781e-42
Tpp1	1.00313e-46	-0.119911	0.654	0.702	1.53679e-42
Arhgap31	1.07144e-46	-0.145334	0.33	0.409	1.64145e-42
Trf	1.13585e-46	-0.116051	0.879	0.901	1.74013e-42
Ola1	1.16945e-46	0.126074	0.384	0.289	1.7916e-42
Dnaja1	1.27844e-46	-0.160693	0.631	0.678	1.95857e-42
Egr3	1.31631e-46	0.114447	0.164	0.098	2.01659e-42
Efnb1	1.36021e-46	-0.0966647	0.096	0.16	2.08384e-42
Efcab14	1.44044e-46	-0.12563	0.269	0.351	2.20675e-42
Fam58b	1.5835e-46	-0.112421	0.226	0.298	2.42592e-42
Pea15a	1.70259e-46	0.145831	0.485	0.391	2.60837e-42
Zfp422	1.76017e-46	-0.102539	0.149	0.22	2.69658e-42
Ttr	2.1064e-46	0.265089	0.129	0.069	3.22701e-42
Tmem245	2.16202e-46	-0.145876	0.244	0.323	3.31222e-42
Haus8	2.25242e-46	0.0733579	0.143	0.08	3.45071e-42
AC160562.1	2.41202e-46	-0.0878166	0.066	0.123	3.69521e-42
Hps4	2.41473e-46	-0.148532	0.467	0.538	3.69937e-42
Fcgr3	2.45944e-46	-0.0435582	0.923	0.94	3.76786e-42
Jkamp	2.49821e-46	-0.112385	0.276	0.354	3.82725e-42
0610040J01Rik	2.88264e-46	-0.121672	0.402	0.471	4.41621e-42
Fbxl14	2.9453e-46	-0.102421	0.161	0.236	4.5122e-42
Phc2	3.47793e-46	-0.119662	0.224	0.299	5.32819e-42
St3gal2	3.64967e-46	-0.107068	0.154	0.224	5.59129e-42
Hspa13	4.06131e-46	-0.114023	0.208	0.283	6.22193e-42
Fcgr4	4.12327e-46	0.0677925	0.17	0.102	6.31685e-42
Tppp	4.13736e-46	-0.0888248	0.094	0.161	6.33843e-42
Prpf4b	4.21364e-46	-0.149556	0.512	0.571	6.4553e-42
Rab3gap1	4.40997e-46	-0.140563	0.274	0.348	6.75607e-42
Brd1	4.78108e-46	-0.148468	0.454	0.515	7.32462e-42
Rela	5.18836e-46	-0.122308	0.253	0.329	7.94857e-42
Slc3a2	5.35299e-46	-0.129499	0.731	0.792	8.20078e-42
Lars2	5.38921e-46	-0.16608	0.212	0.294	8.25627e-42
Lsm4	5.43003e-46	0.139445	0.431	0.341	8.31881e-42
Ndufa4	6.18866e-46	0.13324	0.751	0.735	9.48103e-42
Slc29a3	7.10998e-46	-0.123805	0.735	0.784	1.08925e-41
Uqcr10	7.43192e-46	0.145199	0.561	0.491	1.13857e-41
2410002F23Rik	7.49998e-46	-0.0965702	0.098	0.16	1.149e-41
Plod3	8.72885e-46	-0.134462	0.47	0.544	1.33726e-41
Tra2a	9.76184e-46	-0.141804	0.668	0.707	1.49551e-41
Wdr45b	1.11304e-45	-0.124394	0.285	0.359	1.70517e-41
Kdm2a	1.11833e-45	-0.14174	0.394	0.462	1.71328e-41
9930021J03Rik	1.21018e-45	-0.130313	0.239	0.317	1.85399e-41
Cask	1.2154e-45	-0.144559	0.222	0.301	1.86199e-41
Il17ra	1.36503e-45	-0.142691	0.369	0.45	2.09123e-41
Jrkl	1.4394e-45	-0.0958438	0.091	0.155	2.20516e-41
Tnfrsf17	1.48559e-45	-0.110352	0.194	0.278	2.27592e-41
Arpc5	1.77851e-45	0.146489	0.716	0.665	2.72467e-41
Zfand5	1.79774e-45	-0.160989	0.673	0.718	2.75414e-41
Cd84	1.80152e-45	-0.135787	0.682	0.738	2.75993e-41
Eid2	2.93246e-45	-0.0897203	0.114	0.183	4.49252e-41
Irak1	3.27834e-45	-0.138306	0.301	0.366	5.02242e-41
Edf1	3.4162e-45	0.132676	0.714	0.657	5.23362e-41
Abcc5	3.61726e-45	-0.150494	0.287	0.368	5.54165e-41
Tardbp	5.55605e-45	-0.146156	0.334	0.395	8.51186e-41
Slc12a6	5.84617e-45	-0.146889	0.329	0.406	8.95633e-41
Rab1a	6.12072e-45	-0.122804	0.482	0.541	9.37694e-41
Rpl13a	6.85334e-45	0.128927	0.695	0.616	1.04993e-40
Phc3	7.36518e-45	-0.148047	0.264	0.345	1.12835e-40
Rnf135	1.0478e-44	-0.0998224	0.119	0.188	1.60523e-40
Ank2	1.12684e-44	-0.150353	0.289	0.372	1.72632e-40
Chn2	1.17155e-44	-0.124747	0.266	0.342	1.79482e-40
Fbrsl1	1.43187e-44	-0.141983	0.389	0.453	2.19363e-40
Wdfy3	1.50786e-44	-0.136959	0.29	0.364	2.31005e-40
Zfp865	1.53967e-44	-0.0953702	0.081	0.139	2.35878e-40
Tnfaip8l2	1.67547e-44	-0.107399	0.751	0.789	2.56682e-40
Rinl	1.94723e-44	-0.108811	0.178	0.251	2.98316e-40
Agpat3	1.95911e-44	-0.118916	0.41	0.477	3.00135e-40
Crlf3	2.02698e-44	-0.138454	0.595	0.652	3.10534e-40
Prdx6	2.19297e-44	0.180213	0.328	0.249	3.35962e-40
Gatad2b	2.283e-44	-0.141154	0.404	0.469	3.49755e-40
Arhgap25	2.36063e-44	-0.127985	0.306	0.382	3.61649e-40
Amfr	2.41632e-44	-0.119181	0.363	0.428	3.7018e-40
Mrpl54	2.53826e-44	0.112746	0.335	0.245	3.88861e-40
Kctd12	2.68995e-44	-0.135761	0.905	0.933	4.12101e-40
Kdm6b	2.91786e-44	0.180183	0.328	0.253	4.47017e-40
Abca1	2.99461e-44	-0.107035	0.564	0.658	4.58774e-40
Nsmce3	3.1571e-44	-0.107365	0.262	0.334	4.83668e-40
Dpp8	3.27751e-44	-0.142454	0.26	0.332	5.02115e-40
Zbtb18	3.67063e-44	-0.127171	0.318	0.394	5.6234e-40
Trim65	3.85292e-44	-0.099578	0.124	0.195	5.90267e-40
Qrich1	4.21364e-44	-0.122021	0.221	0.288	6.45529e-40
Tspan31	4.57375e-44	-0.119308	0.433	0.491	7.00699e-40
Tspan13	4.64704e-44	-0.129502	0.473	0.541	7.11927e-40
Pds5a	4.85823e-44	-0.145261	0.324	0.394	7.44282e-40
Zfp260	4.94231e-44	-0.110905	0.156	0.228	7.57161e-40
Clptm1	5.87976e-44	-0.11565	0.415	0.48	9.00779e-40
Gem	6.12292e-44	0.01436	0.371	0.288	9.38031e-40
Hfe	6.96212e-44	-0.126502	0.492	0.574	1.0666e-39
Kmt2c	7.52913e-44	-0.148101	0.4	0.462	1.15346e-39
Rbm26	7.85097e-44	-0.143494	0.456	0.506	1.20277e-39
Zfp110	8.06605e-44	-0.0907641	0.124	0.195	1.23572e-39
Ptprm	8.61705e-44	-0.0914555	0.098	0.164	1.32013e-39
Slc25a45	8.63477e-44	-0.119251	0.268	0.347	1.32285e-39
Pros1	9.13168e-44	-0.108017	0.68	0.743	1.39897e-39
Ppp6r3	9.30952e-44	-0.142147	0.27	0.338	1.42622e-39
Yme1l1	9.5506e-44	-0.121427	0.343	0.419	1.46315e-39
Aprt	9.83608e-44	0.144949	0.433	0.346	1.50689e-39
Hlx	9.85293e-44	0.0941796	0.208	0.134	1.50947e-39
Mgat5	1.03627e-43	-0.134337	0.274	0.344	1.58756e-39
Pan3	1.32792e-43	-0.144459	0.45	0.519	2.03438e-39
Tbc1d23	1.40868e-43	-0.137219	0.274	0.347	2.1581e-39
Tgfa	1.45715e-43	-0.113073	0.209	0.29	2.23236e-39
Nol11	1.49744e-43	-0.107976	0.192	0.261	2.29407e-39
Trmt1l	1.52404e-43	-0.129862	0.212	0.29	2.33483e-39
Zfp157	2.14998e-43	-0.123016	0.175	0.253	3.29377e-39
Fam96a	2.17447e-43	0.135407	0.471	0.384	3.33129e-39
Oxr1	2.34531e-43	-0.119781	0.231	0.304	3.59302e-39
Ccnt2	2.38094e-43	-0.139005	0.39	0.466	3.64759e-39
Appbp2	2.84868e-43	-0.111768	0.218	0.281	4.36417e-39
Ncf2	2.8602e-43	-0.142131	0.696	0.735	4.38182e-39
Plin2	3.11829e-43	0.134784	0.252	0.172	4.77723e-39
Acvr2b	3.23139e-43	-0.10007	0.104	0.17	4.95049e-39
Zyg11b	3.27343e-43	-0.123712	0.197	0.267	5.01489e-39
Eif3j1	3.32902e-43	-0.125528	0.343	0.414	5.10005e-39
Irf2bp1	3.66188e-43	-0.0991687	0.143	0.209	5.61e-39
Oma1	3.88701e-43	-0.115719	0.21	0.282	5.9549e-39
Psmc2	3.91491e-43	-0.112758	0.449	0.513	5.99764e-39
Lrrc3	3.93186e-43	-0.12652	0.441	0.509	6.02361e-39
Ppp4r3a	4.5165e-43	-0.130201	0.291	0.364	6.91928e-39
Bet1l	4.7184e-43	-0.102707	0.123	0.19	7.22858e-39
D5Ertd579e	5.0903e-43	-0.130404	0.207	0.278	7.79833e-39
Cd274	5.22583e-43	0.0869502	0.132	0.073	8.00597e-39
Trim2	5.24976e-43	-0.122587	0.141	0.212	8.04263e-39
Rel	5.59844e-43	0.178736	0.534	0.459	8.57681e-39
Cdk13	5.68702e-43	-0.135656	0.292	0.361	8.71251e-39
Pkn2	6.13293e-43	-0.134752	0.35	0.416	9.39564e-39
Sdf2l1	6.36137e-43	0.156211	0.676	0.634	9.74563e-39
Nsd1	7.20641e-43	-0.127826	0.553	0.584	1.10402e-38
Fhod1	7.49159e-43	-0.100348	0.154	0.222	1.14771e-38
Myo7a	7.56684e-43	-0.0950004	0.089	0.144	1.15924e-38
Sord	9.44458e-43	0.0935183	0.272	0.19	1.44691e-38
Pigk	9.54703e-43	-0.120903	0.327	0.386	1.46261e-38
Plaur	9.92714e-43	0.161171	0.166	0.104	1.52084e-38
Capns1	1.03954e-42	0.135004	0.648	0.573	1.59258e-38
Atp2a2	1.09856e-42	-0.135373	0.383	0.449	1.68299e-38
Ifi27	1.13083e-42	-0.142365	0.457	0.535	1.73243e-38
Zscan26	1.281e-42	-0.12544	0.308	0.39	1.96248e-38
Neat1	1.71084e-42	0.112687	0.454	0.359	2.621e-38
Araf	1.82255e-42	-0.113423	0.207	0.274	2.79215e-38
Arhgap39	1.98894e-42	-0.126353	0.269	0.349	3.04706e-38
Bclaf1	2.06253e-42	-0.147478	0.583	0.619	3.1598e-38
Rab18	2.15738e-42	-0.1144	0.434	0.501	3.30511e-38
Itgb3	2.33089e-42	-0.102882	0.096	0.155	3.57092e-38
Acox3	2.35156e-42	-0.165488	0.395	0.461	3.60259e-38
Med22	2.49061e-42	-0.0958365	0.124	0.185	3.81561e-38
Tmem199	2.55838e-42	-0.104265	0.164	0.229	3.91944e-38
Btbd19	3.24329e-42	-0.0719667	0.059	0.112	4.96872e-38
Rc3h2	3.70408e-42	-0.136662	0.248	0.322	5.67465e-38
Ubr1	3.8268e-42	-0.112734	0.141	0.21	5.86266e-38
Mrps15	4.11173e-42	0.117018	0.477	0.384	6.29916e-38
Copa	4.80642e-42	-0.125935	0.446	0.511	7.36344e-38
Itsn2	5.00431e-42	-0.143741	0.371	0.429	7.6666e-38
Esd	5.27349e-42	0.139427	0.593	0.515	8.07898e-38
Setd1b	6.65774e-42	-0.116881	0.209	0.279	1.01997e-37
Lig1	6.941e-42	0.114615	0.121	0.068	1.06336e-37
Mtmr6	7.11464e-42	-0.112246	0.309	0.365	1.08996e-37
Rtn4	8.0868e-42	-0.0961234	0.839	0.865	1.2389e-37
Safb2	8.63085e-42	-0.161314	0.482	0.54	1.32225e-37
Abracl	8.79473e-42	0.138262	0.54	0.457	1.34735e-37
Gm32036	9.10051e-42	-0.105092	0.11	0.173	1.3942e-37
Mepce	9.17696e-42	-0.101839	0.153	0.226	1.40591e-37
Zfp120	9.27849e-42	-0.123796	0.226	0.302	1.42146e-37
Sema4c	9.40127e-42	-0.10697	0.169	0.242	1.44027e-37
Tmf1	9.45591e-42	-0.114053	0.43	0.461	1.44864e-37
Atp6v0a2	9.8443e-42	-0.128782	0.429	0.49	1.50815e-37
Adam15	1.07642e-41	-0.125985	0.521	0.58	1.64907e-37
Riok2	1.08624e-41	-0.0949296	0.111	0.173	1.66412e-37
Rhot1	1.09437e-41	-0.129309	0.227	0.296	1.67657e-37
Pptc7	1.24729e-41	-0.0944318	0.104	0.168	1.91085e-37
Arl8a	1.41336e-41	-0.113486	0.366	0.426	2.16526e-37
Smg1	1.44167e-41	-0.147147	0.343	0.412	2.20864e-37
Chd8	1.44389e-41	-0.140209	0.296	0.365	2.21204e-37
Rab10	1.57204e-41	-0.116856	0.485	0.527	2.40837e-37
Zfp397	1.58465e-41	-0.131599	0.232	0.301	2.42769e-37
Tnrc6c	1.62218e-41	-0.126235	0.406	0.455	2.48519e-37
Adam10	1.67366e-41	-0.122566	0.62	0.681	2.56404e-37
Trim5	1.77431e-41	-0.106306	0.118	0.186	2.71825e-37
Tm2d3	1.78353e-41	-0.101078	0.376	0.453	2.73236e-37
Cul1	1.83943e-41	-0.110079	0.552	0.591	2.818e-37
Il4ra	2.0502e-41	-0.120323	0.296	0.374	3.14091e-37
Tmem259	2.05891e-41	-0.123929	0.288	0.351	3.15425e-37
Chordc1	2.16927e-41	-0.125823	0.295	0.358	3.32333e-37
Ago3	2.24424e-41	-0.148976	0.208	0.278	3.43817e-37
Unc50	2.37672e-41	-0.109185	0.428	0.493	3.64113e-37
Vps9d1	2.61896e-41	-0.142802	0.274	0.345	4.01225e-37
Arsk	2.77092e-41	-0.102618	0.193	0.271	4.24506e-37
Filip1l	2.88902e-41	-0.141223	0.239	0.315	4.42597e-37
Thumpd3	3.04784e-41	-0.116341	0.258	0.33	4.66929e-37
Aars	4.06352e-41	-0.124779	0.3	0.375	6.22532e-37
Isyna1	4.23213e-41	-0.110446	0.241	0.302	6.48363e-37
2210016F16Rik	4.38544e-41	-0.10721	0.276	0.338	6.71849e-37
Rdx	4.50492e-41	-0.119059	0.55	0.597	6.90154e-37
Rbm6	4.55531e-41	-0.140923	0.299	0.369	6.97874e-37
Psip1	5.25299e-41	0.097463	0.202	0.131	8.04759e-37
Sec61a1	5.29812e-41	-0.129405	0.269	0.33	8.11671e-37
Smad5	5.46845e-41	-0.102257	0.12	0.179	8.37767e-37
Hnrnpr	5.49523e-41	-0.126482	0.365	0.426	8.41869e-37
Rsbn1l	5.96313e-41	-0.12628	0.484	0.554	9.13552e-37
Tmem109	6.9212e-41	-0.115051	0.379	0.452	1.06033e-36
Arfgap2	6.96604e-41	-0.109963	0.332	0.399	1.0672e-36
Fmnl1	7.25822e-41	-0.115833	0.398	0.456	1.11196e-36
BC005561	7.47184e-41	-0.152487	0.282	0.343	1.14469e-36
Mdm4	7.47449e-41	-0.153772	0.371	0.437	1.14509e-36
Myl2	8.49368e-41	-0.0749959	0.074	0.128	1.30123e-36
Gtf3c2	1.00349e-40	-0.116025	0.162	0.23	1.53735e-36
Zbtb1	1.35407e-40	-0.122318	0.254	0.327	2.07443e-36
2020-03-07	1.36427e-40	-0.124233	0.388	0.447	2.09006e-36
Atp5b	1.4795e-40	0.121788	0.76	0.742	2.2666e-36
Zfp866	1.61163e-40	-0.0741043	0.059	0.111	2.46901e-36
Rgl2	1.68518e-40	-0.146654	0.339	0.415	2.58169e-36
Arl10	1.78162e-40	-0.0999665	0.163	0.238	2.72945e-36
Stk10	1.80547e-40	-0.12351	0.289	0.367	2.76597e-36
Ptpro	1.88003e-40	-0.12076	0.238	0.311	2.88021e-36
Pdlim4	2.07367e-40	-0.116886	0.459	0.529	3.17687e-36
Elk3	2.25493e-40	-0.123658	0.349	0.413	3.45456e-36
Got1	2.46531e-40	0.116587	0.274	0.196	3.77686e-36
Gxylt1	2.46731e-40	-0.125696	0.288	0.342	3.77991e-36
Gcnt2	2.65757e-40	0.115758	0.293	0.211	4.0714e-36
Nfatc1	2.69336e-40	-0.126568	0.249	0.315	4.12623e-36
Crk	2.80303e-40	-0.122279	0.258	0.316	4.29425e-36
Slc35a5	3.1644e-40	-0.112351	0.225	0.294	4.84785e-36
N4bp2l2	3.26862e-40	-0.127597	0.427	0.474	5.00752e-36
D3Ertd751e	3.41207e-40	-0.0782719	0.083	0.142	5.2273e-36
Cdkal1	3.77225e-40	-0.114749	0.15	0.217	5.77909e-36
0610009O20Rik	4.08072e-40	-0.095839	0.122	0.186	6.25167e-36
Enc1	4.24527e-40	-0.123306	0.146	0.211	6.50376e-36
Dbnl	4.46548e-40	-0.110697	0.468	0.517	6.84112e-36
Eva1a	5.44048e-40	-0.0968005	0.122	0.188	8.33482e-36
Fbxl12	5.44619e-40	-0.0983466	0.129	0.199	8.34357e-36
Tmem243	6.18932e-40	-0.106203	0.464	0.517	9.48204e-36
Zfp160	6.78397e-40	-0.0961463	0.081	0.138	1.0393e-35
Cox7a2l	6.94744e-40	0.125208	0.872	0.831	1.06435e-35
Uso1	7.08815e-40	-0.1158	0.205	0.27	1.0859e-35
Csnk2a1	7.53725e-40	-0.119764	0.238	0.308	1.15471e-35
Zmynd11	7.6029e-40	-0.12484	0.389	0.455	1.16476e-35
Sort1	7.9155e-40	-0.110177	0.341	0.411	1.21266e-35
Aftph	8.5891e-40	-0.13729	0.42	0.489	1.31585e-35
Trip11	1.062e-39	-0.141151	0.403	0.46	1.62699e-35
Zfp280d	1.065e-39	-0.128559	0.218	0.288	1.63159e-35
Maml2	1.16677e-39	-0.117231	0.207	0.282	1.78749e-35
Pilra	1.17869e-39	0.0942162	0.28	0.2	1.80576e-35
Thrsp	1.30723e-39	-0.118419	0.396	0.486	2.00268e-35
Appl2	1.34157e-39	-0.104709	0.15	0.222	2.05528e-35
Wdr33	1.37594e-39	-0.103333	0.152	0.22	2.10794e-35
Mat2b	1.41216e-39	-0.111674	0.372	0.439	2.16343e-35
Ccng2	1.47175e-39	-0.118743	0.388	0.45	2.25471e-35
Ankrd17	1.49125e-39	-0.149251	0.4	0.464	2.2846e-35
Senp6	1.57896e-39	-0.119625	0.439	0.495	2.41896e-35
Srpk3	1.75921e-39	-0.0823536	0.074	0.129	2.69511e-35
Tor4a	1.84108e-39	-0.0673917	0.06	0.11	2.82053e-35
Tbc1d14	1.95977e-39	-0.125864	0.273	0.345	3.00237e-35
Dcaf17	2.54595e-39	-0.103704	0.153	0.222	3.90039e-35
Plpp1	2.6058e-39	-0.108637	0.221	0.286	3.99208e-35
Ppp4r3b	3.27021e-39	-0.123013	0.301	0.368	5.00996e-35
Lfng	3.29902e-39	-0.10791	0.188	0.257	5.0541e-35
Ctnnbip1	3.36135e-39	-0.0944423	0.198	0.247	5.14959e-35
Clcn5	3.84689e-39	-0.0919427	0.1	0.151	5.89343e-35
Zkscan8	3.9117e-39	-0.0856349	0.067	0.121	5.99273e-35
Chst7	4.50263e-39	-0.111087	0.264	0.334	6.89804e-35
Jam2	6.11278e-39	-0.107407	0.349	0.417	9.36478e-35
Phf11b	6.22766e-39	0.109772	0.203	0.134	9.54077e-35
Sf1	6.88892e-39	-0.118134	0.335	0.396	1.05538e-34
Rffl	6.93631e-39	-0.107047	0.168	0.23	1.06264e-34
B3galt6	7.04572e-39	-0.0809427	0.088	0.141	1.0794e-34
Elavl1	8.81813e-39	-0.111797	0.42	0.48	1.35094e-34
Zc3h6	8.98721e-39	-0.0773369	0.058	0.109	1.37684e-34
Nuak1	9.58216e-39	-0.131556	0.326	0.399	1.46799e-34
Tsnax	1.15548e-38	-0.116236	0.243	0.306	1.7702e-34
Fmc1	1.1777e-38	0.0542145	0.154	0.097	1.80424e-34
Arhgef12	1.43403e-38	-0.116073	0.199	0.273	2.19693e-34
Mpst	1.54601e-38	0.0843483	0.231	0.159	2.36849e-34
Mecp2	1.58459e-38	-0.114985	0.209	0.281	2.4276e-34
Setd2	1.74565e-38	-0.136258	0.366	0.432	2.67434e-34
Rasa4	1.82627e-38	-0.135155	0.318	0.381	2.79785e-34
Acsl1	1.89424e-38	-0.119619	0.201	0.272	2.90198e-34
Gimap9	2.11256e-38	-0.0673643	0.055	0.105	3.23645e-34
Mfhas1	2.17507e-38	-0.107444	0.211	0.274	3.33221e-34
Bad	2.31516e-38	0.0715305	0.294	0.216	3.54683e-34
Mycbp2	2.41311e-38	-0.134253	0.747	0.765	3.69689e-34
Riox1	2.56967e-38	-0.0780879	0.089	0.145	3.93673e-34
Ppid	2.6998e-38	-0.112349	0.304	0.375	4.1361e-34
Tmem208	2.89017e-38	-0.106142	0.442	0.495	4.42774e-34
Strn3	2.96624e-38	-0.12305	0.332	0.396	4.54429e-34
Mrpl28	2.9747e-38	0.0737518	0.292	0.214	4.55724e-34
Arcn1	2.98717e-38	-0.111912	0.335	0.399	4.57634e-34
Sirt7	3.18981e-38	-0.118525	0.342	0.414	4.88679e-34
Adrb1	3.19634e-38	-0.110296	0.125	0.192	4.8968e-34
Sec14l1	3.27366e-38	-0.127888	0.453	0.514	5.01525e-34
Strada	3.46667e-38	-0.113446	0.184	0.246	5.31094e-34
Copb1	4.12724e-38	-0.11083	0.443	0.494	6.32293e-34
Secisbp2	4.50479e-38	-0.12306	0.191	0.256	6.90133e-34
Ufsp2	4.52102e-38	-0.116442	0.353	0.406	6.9262e-34
Igsf6	4.79656e-38	0.139774	0.415	0.329	7.34832e-34
Uba7	4.80954e-38	-0.106705	0.146	0.212	7.36822e-34
Sin3b	4.82578e-38	0.120185	0.548	0.463	7.39309e-34
Uspl1	4.93672e-38	-0.092023	0.084	0.138	7.56305e-34
Stard8	5.02276e-38	-0.0970906	0.114	0.173	7.69487e-34
Arhgef2	5.38148e-38	-0.131657	0.363	0.429	8.24443e-34
Ttc7	5.78582e-38	-0.118911	0.259	0.334	8.86388e-34
Rbm17	5.95787e-38	0.0941327	0.308	0.227	9.12746e-34
Rpl36al	6.41843e-38	0.138383	0.61	0.537	9.83304e-34
Zmat1	6.56822e-38	-0.0724805	0.065	0.117	1.00625e-33
Trim35	6.95671e-38	-0.120542	0.299	0.382	1.06577e-33
Manea	6.9611e-38	-0.0914162	0.121	0.182	1.06644e-33
Nt5dc2	7.13926e-38	0.0634077	0.139	0.082	1.09373e-33
Glrp1	8.03173e-38	-0.0832249	0.088	0.145	1.23046e-33
Rsl1d1	8.23841e-38	-0.10864	0.403	0.47	1.26212e-33
Mettl1	9.70691e-38	-0.0903069	0.097	0.149	1.4871e-33
Dab2	1.00149e-37	-0.216568	0.096	0.115	1.53429e-33
Cldnd1	1.01049e-37	-0.100355	0.487	0.528	1.54807e-33
Ccdc88a	1.09591e-37	0.100337	0.362	0.277	1.67893e-33
Ppt1	1.11808e-37	-0.100186	0.67	0.707	1.71289e-33
Aak1	1.29738e-37	-0.110238	0.146	0.203	1.98758e-33
Arfgef1	1.32965e-37	-0.120237	0.266	0.336	2.03703e-33
Abcd2	1.35037e-37	-0.117721	0.319	0.394	2.06877e-33
Glrx	1.351e-37	0.0867072	0.186	0.12	2.06974e-33
Vta1	1.46758e-37	-0.0981069	0.252	0.322	2.24834e-33
Zfp217	1.65038e-37	-0.0969046	0.127	0.193	2.52838e-33
Iars	1.82732e-37	-0.100681	0.138	0.194	2.79945e-33
Selenof	2.00599e-37	0.107484	0.865	0.857	3.07317e-33
Gmppb	2.01538e-37	-0.0812439	0.092	0.144	3.08756e-33
Isg15	2.06057e-37	0.197241	0.137	0.081	3.15679e-33
Ralb	2.07077e-37	-0.112894	0.492	0.539	3.17242e-33
Med1	2.37325e-37	-0.117219	0.264	0.32	3.63582e-33
Commd1	2.78955e-37	0.117593	0.392	0.307	4.27358e-33
Svbp	2.81249e-37	0.107443	0.454	0.365	4.30873e-33
Gpx4	2.90463e-37	0.115333	0.818	0.787	4.4499e-33
Rab20	2.93304e-37	0.150165	0.334	0.278	4.49342e-33
Rprd2	3.18302e-37	-0.116156	0.191	0.259	4.87639e-33
Dhx30	3.26468e-37	-0.115742	0.199	0.268	5.0015e-33
Mesd	3.61216e-37	-0.108577	0.304	0.37	5.53383e-33
Tnfaip1	3.75834e-37	-0.0979204	0.189	0.247	5.75778e-33
Vwa5a	4.07573e-37	-0.105404	0.334	0.394	6.24402e-33
Nipbl	4.47844e-37	-0.130952	0.583	0.606	6.86097e-33
Pgrmc1	5.05287e-37	-0.0994963	0.299	0.372	7.741e-33
Scamp5	5.24981e-37	-0.112559	0.243	0.308	8.04271e-33
Ndufb8	5.30396e-37	0.12896	0.639	0.582	8.12567e-33
Hexa	6.03308e-37	0.110721	0.927	0.926	9.24267e-33
Zfp606	6.14562e-37	-0.0786425	0.062	0.113	9.41509e-33
Naxd	8.06832e-37	-0.111241	0.348	0.415	1.23607e-32
Ldb1	8.16256e-37	-0.122922	0.31	0.368	1.2505e-32
B4galt1	8.27558e-37	-0.120732	0.421	0.479	1.26782e-32
Ylpm1	8.42713e-37	-0.123974	0.196	0.251	1.29104e-32
Tef	8.68798e-37	-0.122852	0.17	0.239	1.331e-32
Rpl10-ps3	8.93951e-37	0.0666293	0.206	0.139	1.36953e-32
Tbl1xr1	9.14945e-37	-0.116395	0.313	0.376	1.4017e-32
Commd7	1.11886e-36	-0.104203	0.41	0.459	1.7141e-32
Tceal9	1.25368e-36	0.0950707	0.315	0.235	1.92063e-32
1110004F10Rik	1.36439e-36	-0.110697	0.42	0.482	2.09025e-32
Calcrl	1.37801e-36	-0.0639485	0.067	0.118	2.11112e-32
Sfpq	1.41002e-36	-0.134921	0.687	0.728	2.16016e-32
Wwc2	1.46206e-36	-0.124421	0.194	0.256	2.23988e-32
Zc3h7a	1.51911e-36	-0.137543	0.389	0.45	2.32728e-32
Gdi1	1.53749e-36	-0.115522	0.241	0.31	2.35544e-32
Insig1	1.79701e-36	0.0625159	0.15	0.093	2.75302e-32
Tmem170b	1.85147e-36	-0.124541	0.29	0.352	2.83646e-32
Cd9	1.91406e-36	-0.0591083	0.933	0.937	2.93233e-32
Arrb1	2.15064e-36	-0.100052	0.163	0.222	3.29478e-32
Tnpo3	2.15889e-36	-0.119822	0.245	0.312	3.30742e-32
Fam217b	2.26141e-36	-0.0964807	0.131	0.189	3.46448e-32
Orc4	2.68132e-36	-0.0952365	0.175	0.237	4.10779e-32
Ntpcr	2.75868e-36	-0.112536	0.663	0.722	4.22629e-32
Creb3l2	2.93881e-36	-0.102374	0.161	0.228	4.50225e-32
Hcls1	3.09647e-36	-0.109438	0.566	0.615	4.7438e-32
Kdm2b	3.11414e-36	-0.124672	0.366	0.427	4.77087e-32
Ewsr1	3.3012e-36	-0.133764	0.477	0.529	5.05744e-32
Eif4g3	3.49926e-36	-0.130723	0.386	0.437	5.36086e-32
Supt20	3.85157e-36	-0.119567	0.347	0.417	5.90061e-32
Ccdc115	3.94145e-36	-0.0989636	0.273	0.339	6.03831e-32
Fem1a	4.27979e-36	-0.0778568	0.096	0.154	6.55664e-32
2510039O18Rik	4.67865e-36	-0.102863	0.267	0.33	7.16769e-32
Chst1	4.76368e-36	-0.100745	0.145	0.201	7.29796e-32
Tcirg1	4.96545e-36	-0.133235	0.539	0.589	7.60707e-32
Lrrc25	5.16968e-36	-0.111578	0.43	0.495	7.91995e-32
0610037L13Rik	5.1995e-36	-0.107346	0.222	0.29	7.96563e-32
Lnpep	5.24209e-36	-0.115375	0.465	0.524	8.03088e-32
Smo	5.56165e-36	-0.12514	0.257	0.328	8.52045e-32
Trim56	5.61904e-36	-0.127909	0.18	0.249	8.60838e-32
Mfap1b	6.57882e-36	-0.0847393	0.134	0.198	1.00787e-31
Sgk1	6.68253e-36	-0.0252644	0.666	0.745	1.02376e-31
Dnase2a	6.7412e-36	-0.118167	0.536	0.599	1.03275e-31
C5ar1	7.58922e-36	-0.128531	0.331	0.41	1.16267e-31
H2-T22	7.67796e-36	0.0847358	0.268	0.193	1.17626e-31
Thap2	7.7099e-36	-0.0960734	0.121	0.179	1.18116e-31
Ubap2l	7.74313e-36	-0.114386	0.549	0.58	1.18625e-31
Sp1	8.10087e-36	-0.113179	0.212	0.276	1.24105e-31
Asb2	9.13405e-36	-0.107143	0.248	0.311	1.39934e-31
Fam46c	9.32732e-36	0.146139	0.565	0.518	1.42894e-31
Brd2	9.91709e-36	-0.127675	0.466	0.509	1.5193e-31
Derl1	1.13575e-35	-0.10663	0.593	0.644	1.73997e-31
Lhfpl2	1.18327e-35	-0.153722	0.432	0.496	1.81276e-31
Wdr37	1.22366e-35	-0.10908	0.189	0.254	1.87464e-31
Plcg1	1.22756e-35	-0.0969573	0.108	0.167	1.88063e-31
Ttc13	1.28126e-35	-0.099916	0.148	0.2	1.96289e-31
Slc23a2	1.29344e-35	-0.10411	0.194	0.264	1.98155e-31
Gtpbp2	1.31252e-35	-0.121433	0.406	0.473	2.01078e-31
Zfp329	1.37883e-35	-0.103267	0.148	0.215	2.11236e-31
Dmxl1	1.53537e-35	-0.139093	0.29	0.35	2.35218e-31
Treml2	1.90713e-35	0.0569216	0.107	0.059	2.92173e-31
B4galt3	1.92281e-35	-0.0865869	0.148	0.212	2.94575e-31
Zfp398	2.03572e-35	-0.104887	0.161	0.229	3.11872e-31
Minos1	2.23091e-35	0.126131	0.6	0.534	3.41775e-31
Psmb4	2.24943e-35	0.125338	0.606	0.547	3.44612e-31
Cyth3	2.49089e-35	-0.115019	0.204	0.275	3.81604e-31
D1Ertd622e	2.61833e-35	-0.108025	0.291	0.359	4.01128e-31
Cggbp1	2.77873e-35	-0.10534	0.432	0.481	4.25702e-31
Gse1	2.81853e-35	-0.084804	0.122	0.183	4.31799e-31
Bfar	2.84865e-35	-0.113869	0.297	0.361	4.36414e-31
Cdk8	2.86262e-35	-0.115415	0.199	0.258	4.38553e-31
Phospho2	3.05059e-35	-0.0819919	0.106	0.163	4.6735e-31
Slc25a4	3.13223e-35	0.122651	0.69	0.637	4.79858e-31
Asb13	3.44809e-35	-0.0805909	0.11	0.171	5.28248e-31
Nav1	3.5828e-35	-0.0946671	0.112	0.169	5.48885e-31
Znrf1	3.81517e-35	-0.107822	0.252	0.314	5.84484e-31
Pycr2	4.07288e-35	-0.0993391	0.259	0.324	6.23965e-31
Zdhhc5	4.13257e-35	-0.0924658	0.153	0.213	6.33109e-31
Ckap4	4.25516e-35	-0.101904	0.195	0.256	6.51891e-31
Tmed2	4.79739e-35	-0.101482	0.747	0.791	7.34959e-31
4833439L19Rik	5.02747e-35	-0.104105	0.217	0.277	7.70208e-31
Lrp6	5.48816e-35	-0.124569	0.264	0.312	8.40786e-31
Cab39	5.6199e-35	-0.105278	0.399	0.446	8.60969e-31
Rhoa	6.41927e-35	0.0889603	0.913	0.917	9.83432e-31
Dmac1	6.4284e-35	0.0843307	0.296	0.219	9.84831e-31
Snrnp48	6.52419e-35	-0.11929	0.385	0.446	9.99507e-31
0610012G03Rik	6.57211e-35	0.114841	0.478	0.393	1.00685e-30
1600012H06Rik	6.66046e-35	-0.0879414	0.149	0.212	1.02038e-30
Amd1	6.9535e-35	-0.07997	0.105	0.158	1.06528e-30
Eif4g1	6.98766e-35	-0.121196	0.427	0.474	1.07051e-30
Immt	7.11091e-35	-0.116212	0.461	0.507	1.08939e-30
Wtap	7.49437e-35	-0.107812	0.334	0.391	1.14814e-30
Rpl27-ps3	7.54254e-35	0.0559936	0.167	0.108	1.15552e-30
Bax	7.92147e-35	0.13015	0.606	0.558	1.21357e-30
Sltm	7.99011e-35	-0.125521	0.395	0.448	1.22409e-30
Mob1a	9.39667e-35	-0.0966603	0.493	0.524	1.43957e-30
Hist1h1d	9.53004e-35	0.0663666	0.118	0.068	1.46e-30
Dgkd	1.01231e-34	-0.121972	0.356	0.418	1.55085e-30
Zfp646	1.05023e-34	-0.0936164	0.151	0.216	1.60896e-30
Rapgef6	1.06497e-34	-0.124387	0.426	0.478	1.63154e-30
Gtf3c4	1.10281e-34	-0.0798105	0.093	0.147	1.68951e-30
Rcn2	1.18564e-34	-0.0948436	0.256	0.327	1.8164e-30
Smap1	1.23622e-34	-0.109691	0.48	0.531	1.89389e-30
Mettl21a	1.24114e-34	-0.0802547	0.115	0.172	1.90142e-30
Arid2	1.27277e-34	-0.10177	0.172	0.23	1.94988e-30
Atat1	1.33275e-34	-0.0921906	0.115	0.173	2.04177e-30
Prpf39	1.38314e-34	-0.127736	0.277	0.343	2.11897e-30
Wac	1.55898e-34	-0.105349	0.42	0.458	2.38835e-30
Gm10605	1.67606e-34	-0.0690891	0.06	0.106	2.56772e-30
Abraxas2	1.75236e-34	-0.113063	0.333	0.383	2.68462e-30
Alg2	1.86425e-34	-0.0638768	0.064	0.114	2.85603e-30
Sec13	1.91744e-34	-0.0967372	0.332	0.387	2.93752e-30
Gm49336	1.94212e-34	-0.095036	0.132	0.179	2.97532e-30
Fkbp15	2.10575e-34	-0.12288	0.388	0.449	3.22601e-30
Zdhhc14	2.23348e-34	-0.0910385	0.135	0.198	3.42169e-30
H1f0	2.26973e-34	0.145854	0.271	0.209	3.47722e-30
Diaph2	2.48509e-34	-0.124256	0.469	0.515	3.80715e-30
Hist1h2bc	2.64007e-34	-0.185748	0.34	0.422	4.04458e-30
Bcl7b	2.64873e-34	-0.0990632	0.266	0.323	4.05786e-30
3110062M04Rik	2.70621e-34	-0.0772146	0.102	0.152	4.14592e-30
Cyp51	2.71186e-34	0.0694963	0.127	0.075	4.15457e-30
Pitpnc1	2.74396e-34	-0.118405	0.285	0.355	4.20375e-30
Taok2	2.83413e-34	-0.112737	0.214	0.283	4.34188e-30
Fam193b	3.21179e-34	-0.126066	0.14	0.198	4.92046e-30
Pafah1b2	3.28713e-34	-0.0971657	0.217	0.28	5.03589e-30
Kdsr	3.68095e-34	-0.0865509	0.131	0.193	5.63922e-30
Lcor	3.86415e-34	-0.0921622	0.144	0.208	5.91987e-30
Aplp2	3.95697e-34	0.118423	0.504	0.419	6.06207e-30
Ap2m1	4.08009e-34	0.129139	0.559	0.501	6.25069e-30
Per1	4.16156e-34	0.0726556	0.217	0.151	6.37552e-30
Ube2d3	4.23472e-34	-0.124034	0.786	0.817	6.4876e-30
Zcchc24	4.27628e-34	-0.0812635	0.101	0.157	6.55126e-30
Pex3	4.48518e-34	-0.0926851	0.154	0.216	6.87129e-30
Zzz3	4.48893e-34	-0.116447	0.196	0.254	6.87703e-30
Slc38a9	4.50207e-34	-0.13369	0.28	0.347	6.89717e-30
Jmjd6	5.12875e-34	-0.097505	0.192	0.246	7.85725e-30
Mbtps2	5.36062e-34	-0.0987569	0.151	0.213	8.21248e-30
Gbe1	5.3763e-34	-0.0610343	0.058	0.105	8.23648e-30
Magi1	5.4506e-34	-0.0851999	0.076	0.127	8.35032e-30
Rnf180	5.63802e-34	-0.0956345	0.206	0.273	8.63745e-30
Ssb	5.76989e-34	-0.110085	0.596	0.63	8.83948e-30
Pisd	5.81977e-34	-0.0926387	0.153	0.215	8.91589e-30
Hpgd	6.04735e-34	-0.0927353	0.83	0.865	9.26453e-30
Stxbp5	6.14408e-34	-0.0995658	0.172	0.238	9.41273e-30
Map3k14	6.63461e-34	-0.104953	0.155	0.217	1.01642e-29
Sap30	7.29161e-34	0.0648057	0.231	0.164	1.11707e-29
Tecr	7.42897e-34	-0.104597	0.601	0.648	1.13812e-29
Clip2	7.91674e-34	-0.0925184	0.125	0.177	1.21284e-29
Cmc1	8.61931e-34	0.0871419	0.279	0.205	1.32048e-29
Dbt	9.11512e-34	-0.077225	0.09	0.141	1.39644e-29
Gmfb	9.18867e-34	-0.108768	0.307	0.364	1.4077e-29
Rrm2b	9.6426e-34	-0.0910413	0.134	0.197	1.47725e-29
Zfp738	9.82082e-34	-0.0894978	0.104	0.162	1.50455e-29
AI987944	1.03207e-33	-0.094296	0.148	0.205	1.58113e-29
Hdlbp	1.0583e-33	-0.0975958	0.546	0.56	1.62132e-29
Was	1.10505e-33	-0.107426	0.38	0.443	1.69293e-29
[truncated: 5,093 more rows]
