# Supplementary material for: A MAC2-positive progenitor-like microglial population is resistant to CSF1R inhibition in adult mouse brain
Source: eLife. 2020 Oct 15;9:e51796. doi: 10.7554/eLife.51796 (PMC7591254; doi:10.7554/eLife.51796)
Supplement: Figure 6—source data 1. [file elife-51796-fig6-data1.xlsx]

## Sheet: mac2_vs_homeostatic microglia
	p_val	avg_logFC	pct.1	pct.2	p_val_adj	colours
Cd74	0	4.59469	0.74	0.15	0	UP
H2-Aa	0	3.68523	0.399	0.022	0	UP
H2-Eb1	0	3.57673	0.388	0.025	0	UP
H2-Ab1	0	3.49899	0.464	0.078	0	UP
Lyz2	0	3.15062	0.942	0.773	0	UP
Ifitm3	0	2.90953	0.688	0.069	0	UP
Lgals3	0	2.56578	1	0.006	0	UP
Il1b	0	2.53805	0.618	0.094	0	UP
Vim	0	2.41415	0.656	0.02	0	UP
Apoe	0	2.40373	0.679	0.48	0	UP
Crip1	0	2.35628	0.637	0.057	0	UP
S100a6	0	2.3359	0.553	0.005	0	UP
Plac8	0	2.1119	0.301	0.008	0	UP
Fxyd5	0	2.1108	0.752	0.046	0	UP
Ifitm2	0	2.06643	0.547	0.019	0	UP
Ifi27l2a	0	2.04501	0.648	0.07	0	UP
Tmsb10	0	1.92783	0.784	0.523	0	UP
Cybb	0	1.89118	0.603	0.007	0	UP
S100a4	0	1.79296	0.536	0.01	0	UP
Pim1	0	1.70272	0.583	0.073	0	UP
Wfdc17	0	1.69991	0.494	0.015	0	UP
Lsp1	0	1.66672	0.763	0.336	0	UP
Napsa	0	1.65014	0.498	0.001	0	UP
Cd52	0	1.64795	0.939	0.746	0	UP
Cd209a	0	1.55243	0.254	0.001	0	UP
S100a11	0	1.53515	0.523	0.033	0	UP
Ahnak	0	1.47828	0.461	0.002	0	UP
Iqgap1	0	1.45938	0.644	0.054	0	UP
Anxa2	0	1.45245	0.561	0.006	0	UP
Emp3	0	1.44785	0.744	0.186	0	UP
Ms4a6c	0	1.41467	0.63	0.321	0	UP
Ccr2	0	1.40299	0.429	0.031	0	UP
S100a10	0	1.37676	0.479	0.091	0	UP
Plbd1	0	1.27599	0.485	0.001	0	UP
Msrb1	0	1.25263	0.472	0.146	0	UP
H2-D1	0	1.23655	0.965	0.9	0	UP
Rpsa	0	1.20554	0.993	0.977	0	UP
Lgals1	0	1.19267	0.498	0.015	0	UP
Cytip	0	1.18007	0.491	0.031	0	UP
Anxa5	0	1.17909	0.746	0.216	0	UP
Ms4a4c	0	1.17124	0.398	0.011	0	UP
Srgn	0	1.1481	0.892	0.788	0	UP
Slfn2	0	1.14171	0.663	0.154	0	UP
Gpx1	0	1.13784	0.907	0.816	0	UP
Actg1	0	1.07174	0.971	0.974	0	UP
Tnip3	0	1.06886	0.253	0.001	0	UP
Cdkn1a	0	1.06469	0.485	0.082	0	UP
Ifitm6	0	1.0572	0.321	0.001	0	UP
Emb	0	1.05579	0.436	0.003	0	UP
Capg	0	1.03201	0.599	0.162	0	UP
Tspo	0	1.03044	0.804	0.485	0	UP
Smpdl3a	0	1.01886	0.53	0.209	0	UP
Tagln2	0	1.00163	0.628	0.309	0	UP
Itga4	0	0.977898	0.443	0.007	0	UP
Rps5	0	0.949536	0.987	0.985	0	UP
Anxa1	0	0.945678	0.373	0.001	0	UP
H2afz	0	0.935993	0.913	0.864	0	UP
Rplp0	0	0.920186	0.99	0.988	0	UP
Plin2	0	0.915505	0.547	0.152	0	UP
H2-K1	0	0.906365	0.942	0.881	0	UP
H3f3a	0	0.895728	0.967	0.96	0	UP
Mcemp1	0	0.893294	0.39	0.001	0	UP
Adgre5	0	0.88328	0.353	0.002	0	UP
Cxcr4	0	0.879111	0.372	0.003	0	UP
Fth1	0	0.871101	0.995	0.999	0	UP
Rps19	0	0.867436	0.985	0.981	0	UP
Rps26	0	0.865201	0.968	0.941	0	UP
Rpl32	0	0.857584	0.992	0.99	0	UP
Sh3bgrl3	0	0.853591	0.968	0.945	0	UP
Traf1	0	0.844435	0.312	0.003	0	UP
Rps2	0	0.841958	0.973	0.971	0	UP
Rps16	0	0.841401	0.993	0.993	0	UP
Cd44	0	0.830555	0.419	0.004	0	UP
Rpl18	0	0.829891	0.987	0.987	0	UP
Myl6	0	0.825898	0.929	0.853	0	UP
Rack1	0	0.823582	0.974	0.96	0	UP
Stap1	0	0.817622	0.354	0.001	0	UP
Rpl41	0	0.813035	0.98	0.975	0	UP
Rps8	0	0.78762	0.988	0.994	0	UP
Slamf7	0	0.782975	0.317	0.004	0	UP
Gm2a	0	0.782862	0.782	0.612	0	UP
Calm1	0	0.771337	0.921	0.871	0	UP
Ifi204	0	0.766098	0.361	0.02	0	UP
Rpl10a	0	0.765946	0.983	0.975	0	UP
Rps7	0	0.765764	0.984	0.986	0	UP
Rps27a	0	0.765635	0.994	0.996	0	UP
Rps24	0	0.762142	0.998	0.997	0	UP
Clec10a	0	0.761651	0.236	0.001	0	UP
Rpl19	0	0.759827	0.993	0.996	0	UP
Rps11	0	0.759563	0.992	0.995	0	UP
Mrpl33	0	0.755924	0.654	0.335	0	UP
Bcl2a1d	0	0.753997	0.422	0.047	0	UP
Rps18	0	0.746763	0.978	0.975	0	UP
Bhlhe40	0	0.745164	0.29	0.004	0	UP
Rpl24	0	0.740501	0.979	0.967	0	UP
Ifi203	0	0.73643	0.301	0.001	0	UP
Itgb7	0	0.735229	0.356	0.002	0	UP
Lilrb4a	0	0.734718	0.405	0.007	0	UP
Gm10076	0	0.731792	0.873	0.697	0	UP
Rpl8	0	0.726879	0.984	0.983	0	UP
Clec12a	0	0.72444	0.384	0.001	0	UP
Mndal	0	0.72125	0.331	0.001	0	UP
Sem1	0	0.720765	0.849	0.706	0	UP
Rpl13	0	0.719912	0.995	0.998	0	UP
Arpc1b	0	0.719892	0.949	0.942	0	UP
Sh3bgrl	0	0.708602	0.455	0.042	0	UP
Rpl23	0	0.708494	0.993	0.995	0	UP
Rps15a	0	0.701373	0.988	0.99	0	UP
Rpl36	0	0.697509	0.971	0.959	0	UP
Rpl28	0	0.695398	0.985	0.987	0	UP
Ybx1	0	0.695017	0.908	0.829	0	UP
Atox1	0	0.694383	0.895	0.776	0	UP
Rps20	0	0.693615	0.992	0.992	0	UP
Rpl38	0	0.689044	0.973	0.95	0	UP
Serf2	0	0.68607	0.958	0.932	0	UP
Eif3f	0	0.680304	0.905	0.818	0	UP
Rpl9	0	0.678989	0.991	0.991	0	UP
Rps13	0	0.665558	0.987	0.991	0	UP
Ftl1	0	0.66521	0.993	0.998	0	UP
Clec4b1	0	0.663897	0.246	0.001	0	UP
Ifi207	0	0.662465	0.355	0.003	0	UP
Rpl15	0	0.65327	0.976	0.981	0	UP
Trps1	0	0.650855	0.408	0.025	0	UP
Sec61b	0	0.635356	0.842	0.687	0	UP
Fau	0	0.635016	0.997	0.998	0	UP
Npm1	0	0.634961	0.93	0.873	0	UP
Mcub	0	0.63368	0.413	0.003	0	UP
Actr3	0	0.630359	0.868	0.794	0	UP
Rpl35	0	0.63011	0.956	0.92	0	UP
Rps14	0	0.629762	0.987	0.992	0	UP
Gsn	0	0.627532	0.387	0.024	0	UP
Rps10	0	0.623939	0.994	0.995	0	UP
Fgr	0	0.623236	0.331	0.016	0	UP
Lilr4b	0	0.622213	0.317	0.005	0	UP
Rpl23a	0	0.615174	0.948	0.929	0	UP
Emilin2	0	0.614951	0.297	0.001	0	UP
Cyp4f18	0	0.603925	0.292	0.003	0	UP
Naca	0	0.603162	0.964	0.945	0	UP
Arhgap15	0	0.60241	0.41	0.022	0	UP
Olfm1	0	0.59791	0.293	0.004	0	UP
Rpl34	0	0.59589	0.988	0.988	0	UP
Eif3k	0	0.590131	0.861	0.689	0	UP
Rpl37a	0	0.587353	0.988	0.991	0	UP
Rps28	0	0.586852	0.952	0.921	0	UP
Rplp2	0	0.584072	0.985	0.984	0	UP
Rps9	0	0.582284	0.984	0.997	0	UP
Rpl6	0	0.575954	0.988	0.991	0	UP
Rpl14	0	0.573806	0.968	0.96	0	UP
Rpl11	0	0.573584	0.987	0.993	0	UP
Rpl7a	0	0.568547	0.968	0.968	0	UP
Rpl22	0	0.567051	0.965	0.962	0	UP
Gpr141	0	0.565018	0.29	0	0	UP
Rpl17	0	0.559035	0.987	0.99	0	UP
Gpr132	0	0.552581	0.311	0.001	0	UP
Btf3	0	0.546791	0.936	0.907	0	UP
Rps15	0	0.541761	0.961	0.966	0	UP
Rps4x	0	0.541531	0.991	0.995	0	UP
Rpl29	0	0.540316	0.962	0.962	0	UP
Cfp	0	0.538818	0.279	0.005	0	UP
Ezr	0	0.534123	0.329	0.011	0	UP
Rps12	0	0.533829	0.987	0.996	0	UP
Rpl27a	0	0.53107	0.993	0.997	0	UP
Rpl39	0	0.530727	0.988	0.99	0	UP
Rps3a1	0	0.527466	0.991	0.996	0	UP
AB124611	0	0.524375	0.351	0.016	0	UP
Ltb4r1	0	0.523841	0.277	0.003	0	UP
Rpl18a	0	0.521609	0.993	0.996	0	UP
Rpl7	0	0.519729	0.975	0.985	0	UP
Tpt1	0	0.518627	0.996	0.998	0	UP
Rpl10	0	0.510585	0.988	0.994	0	UP
Rps25	0	0.506597	0.97	0.971	0	UP
Alcam	0	0.493967	0.293	0.001	0	NC
Rpl3	0	0.486938	0.979	0.984	0	NC
Rpl26	0	0.479094	0.988	0.992	0	NC
Il2rg	0	0.478017	0.334	0.019	0	NC
Unc119	0	0.457664	0.261	0.002	0	NC
Eef1a1	0	0.457133	0.995	0.999	0	NC
Cd63	0	0.445861	0.542	0.892	0	NC
Runx3	0	0.441326	0.258	0.001	0	NC
Pfkp	0	0.439721	0.263	0.005	0	NC
Rara	0	0.414333	0.235	0.001	0	NC
Ciita	0	0.412813	0.237	0.001	0	NC
Cd9	0	-0.289582	0.779	0.996	0	NC
Syngr1	0	-0.32527	0.444	0.912	0	NC
Ctss	0	-0.403772	0.978	1	0	NC
Ctsl	0	-0.427816	0.662	0.994	0	NC
Tmbim6	0	-0.450802	0.895	0.982	0	NC
Pmp22	0	-0.488689	0.434	0.888	0	NC
Ctsd	0	-0.493602	0.864	1	0	NC
Itm2b	0	-0.496486	0.986	1	0	NC
Tmem59	0	-0.498548	0.832	0.97	0	NC
Ifngr1	0	-0.52194	0.891	0.991	0	DN
Ly86	0	-0.537149	0.904	0.998	0	DN
Aif1	0	-0.543958	0.752	0.984	0	DN
Fam105a	0	-0.54887	0.781	0.965	0	DN
Rrbp1	0	-0.556183	0.872	0.992	0	DN
Irf8	0	-0.564826	0.66	0.954	0	DN
Comt	0	-0.585388	0.644	0.923	0	DN
Laptm5	0	-0.587258	0.963	1	0	DN
Trf	0	-0.588469	0.735	0.957	0	DN
Cd53	0	-0.602255	0.84	0.976	0	DN
Itm2c	0	-0.602802	0.752	0.958	0	DN
Apbb1ip	0	-0.606363	0.758	0.963	0	DN
Rnf13	0	-0.615795	0.6	0.896	0	DN
Lag3	0	-0.624408	0.336	0.797	0	DN
Pros1	0	-0.62913	0.386	0.822	0	DN
Smap2	0	-0.630811	0.736	0.968	0	DN
Saraf	0	-0.63968	0.619	0.925	0	DN
Calm2	0	-0.640002	0.848	0.985	0	DN
Commd8	0	-0.641964	0.555	0.862	0	DN
Bmp2k	0	-0.651689	0.554	0.891	0	DN
Malat1	0	-0.661843	0.969	1	0	DN
Mylip	0	-0.666913	0.362	0.814	0	DN
Fcgr1	0	-0.668569	0.528	0.927	0	DN
Rasgrp3	0	-0.669308	0.252	0.714	0	DN
Sirpa	0	-0.671834	0.791	0.988	0	DN
Fcgr3	0	-0.680183	0.77	0.993	0	DN
Csnk1e	0	-0.684024	0.511	0.859	0	DN
Itga6	0	-0.687594	0.306	0.783	0	DN
Fgd2	0	-0.688127	0.451	0.839	0	DN
Mtdh	0	-0.691255	0.844	0.989	0	DN
Entpd1	0	-0.691538	0.518	0.925	0	DN
Tcn2	0	-0.694615	0.471	0.857	0	DN
Rtn4rl1	0	-0.695271	0.162	0.637	0	DN
Itgam	0	-0.696424	0.677	0.94	0	DN
Tmem86a	0	-0.696883	0.395	0.87	0	DN
Ckb	0	-0.697393	0.738	0.981	0	DN
Anxa3	0	-0.698571	0.541	0.965	0	DN
Unc93b1	0	-0.70433	0.869	0.993	0	DN
Slc1a3	0	-0.70483	0.175	0.662	0	DN
Slc7a8	0	-0.705177	0.259	0.734	0	DN
Fez2	0	-0.705677	0.286	0.757	0	DN
Susd3	0	-0.706883	0.503	0.871	0	DN
Cyfip1	0	-0.706978	0.739	0.972	0	DN
Stab1	0	-0.707475	0.248	0.754	0	DN
Kctd12	0	-0.71168	0.784	0.986	0	DN
Camk1	0	-0.721802	0.549	0.945	0	DN
Dock4	0	-0.721876	0.443	0.851	0	DN
Cxxc5	0	-0.728433	0.263	0.748	0	DN
Frmd4b	0	-0.734922	0.359	0.833	0	DN
Sft2d1	0	-0.736548	0.464	0.85	0	DN
Inpp5d	0	-0.736931	0.598	0.92	0	DN
Cyth4	0	-0.740742	0.799	0.985	0	DN
Slc16a6	0	-0.742829	0.295	0.754	0	DN
Cd33	0	-0.745385	0.472	0.89	0	DN
Ccr5	0	-0.74564	0.508	0.921	0	DN
Usp2	0	-0.745967	0.184	0.681	0	DN
Camk2n1	0	-0.746108	0.182	0.653	0	DN
1700017B05Rik	0	-0.746377	0.257	0.724	0	DN
C1qb	0	-0.751305	0.769	1	0	DN
Ophn1	0	-0.751806	0.313	0.823	0	DN
Abhd12	0	-0.754168	0.667	0.978	0	DN
Selenop	0	-0.754402	0.786	0.997	0	DN
Adap2	0	-0.760439	0.42	0.891	0	DN
Mef2a	0	-0.763909	0.763	0.982	0	DN
Basp1	0	-0.774976	0.651	0.995	0	DN
Rab3il1	0	-0.779434	0.317	0.808	0	DN
Gna15	0	-0.780103	0.35	0.818	0	DN
Scamp2	0	-0.782842	0.689	0.963	0	DN
Itgb5	0	-0.783936	0.598	0.99	0	DN
Tmem173	0	-0.788846	0.399	0.844	0	DN
Pla2g15	0	-0.791092	0.332	0.836	0	DN
Cfh	0	-0.798591	0.567	0.959	0	DN
Dusp6	0	-0.805991	0.254	0.74	0	DN
Cttnbp2nl	0	-0.814012	0.408	0.886	0	DN
Lair1	0	-0.81985	0.544	0.977	0	DN
Rgs10	0	-0.820575	0.843	0.997	0	DN
Ldhb	0	-0.823792	0.5	0.952	0	DN
Cd37	0	-0.828477	0.585	0.944	0	DN
Elmo1	0	-0.829581	0.505	0.888	0	DN
Trem2	0	-0.830828	0.659	1	0	DN
Serpine2	0	-0.832173	0.368	0.927	0	DN
C1qc	0	-0.8323	0.7	1	0	DN
Glul	0	-0.832642	0.58	0.945	0	DN
Rapgef5	0	-0.833698	0.199	0.748	0	DN
Bin1	0	-0.835282	0.686	0.988	0	DN
Abi3	0	-0.837114	0.501	0.93	0	DN
Fchsd2	0	-0.839012	0.287	0.779	0	DN
Smad7	0	-0.851073	0.458	0.862	0	DN
Nrip1	0	-0.852728	0.471	0.883	0	DN
Numb	0	-0.860002	0.211	0.755	0	DN
Ivns1abp	0	-0.861628	0.527	0.932	0	DN
Csmd3	0	-0.863186	0.074	0.627	0	DN
Epb41l2	0	-0.86361	0.605	0.975	0	DN
Cd81	0	-0.871284	0.656	0.999	0	DN
Lrba	0	-0.872812	0.173	0.721	0	DN
Pde3b	0	-0.888238	0.337	0.856	0	DN
Mafb	0	-0.902976	0.586	0.983	0	DN
Rhoh	0	-0.910434	0.361	0.867	0	DN
Scoc	0	-0.917541	0.465	0.941	0	DN
Adrb2	0	-0.920068	0.3	0.778	0	DN
Mertk	0	-0.926308	0.33	0.896	0	DN
Mef2c	0	-0.929012	0.744	0.993	0	DN
Sall1	0	-0.935138	0.267	0.844	0	DN
Marcks	0	-0.938984	0.832	0.999	0	DN
Pag1	0	-0.941242	0.44	0.913	0	DN
St3gal6	0	-0.945395	0.345	0.904	0	DN
Qk	0	-0.952411	0.767	0.994	0	DN
Fscn1	0	-0.964198	0.251	0.842	0	DN
C1qa	0	-0.971101	0.718	1	0	DN
Frmd4a	0	-0.977882	0.412	0.935	0	DN
F11r	0	-0.978047	0.501	0.968	0	DN
Fam102b	0	-0.99629	0.324	0.856	0	DN
Nav2	0	-0.999045	0.268	0.88	0	DN
Lgmn	0	-1.00932	0.754	0.999	0	DN
Tanc2	0	-1.0118	0.337	0.921	0	DN
Nav3	0	-1.02168	0.152	0.749	0	DN
Cmtm6	0	-1.0412	0.564	0.962	0	DN
Txnip	0	-1.05353	0.58	0.946	0	DN
Srgap2	0	-1.06332	0.505	0.961	0	DN
Tgfbr1	0	-1.06339	0.585	0.991	0	DN
Zfhx3	0	-1.06453	0.535	0.962	0	DN
Slco2b1	0	-1.08452	0.317	0.922	0	DN
Golm1	0	-1.08494	0.445	0.959	0	DN
Csf1r	0	-1.08524	0.847	0.999	0	DN
Vsir	0	-1.08942	0.737	0.996	0	DN
Adgrg1	0	-1.09939	0.211	0.871	0	DN
Cst3	0	-1.11857	0.997	1	0	DN
Serinc3	0	-1.12246	0.847	0.999	0	DN
Hexb	0	-1.12368	0.916	1	0	DN
Lpcat2	0	-1.13068	0.647	0.993	0	DN
Plxdc2	0	-1.13282	0.441	0.977	0	DN
Cd164	0	-1.13521	0.353	0.912	0	DN
Sparc	0	-1.15417	0.577	1	0	DN
Hpgds	0	-1.16829	0.455	0.984	0	DN
Rnase4	0	-1.18605	0.456	0.97	0	DN
Sox4	0	-1.25161	0.181	0.758	0	DN
Ecscr	0	-1.2529	0.218	0.916	0	DN
Maf	0	-1.28054	0.385	0.963	0	DN
Ltc4s	0	-1.29208	0.37	0.955	0	DN
Rhob	0	-1.31041	0.598	0.992	0	DN
Olfml3	0	-1.32249	0.521	0.997	0	DN
Ptgs1	0	-1.33057	0.334	0.967	0	DN
Siglech	0	-1.34897	0.464	0.994	0	DN
Crybb1	0	-1.34958	0.236	0.892	0	DN
Slc2a5	0	-1.35027	0.119	0.887	0	DN
Arhgap5	0	-1.36366	0.495	0.982	0	DN
Fcrls	0	-1.41964	0.549	0.997	0	DN
Pmepa1	0	-1.42799	0.426	0.985	0	DN
Cx3cr1	0	-1.44857	0.765	1	0	DN
Gpr34	0	-1.45755	0.52	0.999	0	DN
Selplg	0	-1.57552	0.858	0.999	0	DN
P2ry13	0	-1.63467	0.244	0.975	0	DN
Tmem119	0	-1.84521	0.354	0.998	0	DN
P2ry12	0	-2.18937	0.435	1	0	DN
Bank1	4.94065645841247e-324	-0.588051	0.035	0.45	7.5690856942879e-320	DN
Ctsf	1.63041663127611e-322	-0.58084	0.363	0.813	2.49779827911501e-318	DN
Mgl2	4.24896455423472e-322	1.48588	0.234	0.002	6.50941369708759e-318	UP
Ass1	1.09682573376757e-320	0.392393	0.23	0.001	1.68033702413191e-316	NC
Rps3	2.28455954636992e-320	0.452347	0.987	0.993	3.49994522503872e-316	NC
Tpm4	1.53007189860576e-319	0.629625	0.544	0.154	2.34407014866402e-315	UP
AC149090.1	7.59838378708628e-319	-0.622183	0.517	0.874	1.16407239618162e-314	DN
Sub1	1.53563013712147e-318	0.63762	0.814	0.699	2.35258537007009e-314	UP
Slfn5	1.58130650607949e-318	0.661559	0.294	0.014	2.42256156731378e-314	UP
Gpi1	2.78224175273873e-318	0.600848	0.801	0.58	4.26239436519573e-314	UP
Tpst2	9.29692713026745e-318	-0.638565	0.415	0.797	1.42428923635697e-313	DN
Iqgap2	1.00108322258822e-317	0.357346	0.241	0.002	1.53365949700516e-313	NC
Cxcl16	1.70012287105092e-317	0.774113	0.56	0.389	2.60458823845001e-313	UP
Khdrbs3	7.78933620667876e-317	-0.57494	0.059	0.487	1.19332630686319e-312	DN
Axl	2.48792872496055e-316	0.445669	0.271	0.008	3.81150680663957e-312	NC
Plp2	7.6052119225315e-316	0.349743	0.228	0.001	1.16511846653183e-311	NC
Gtf2h2	9.28761236242671e-316	-0.657283	0.269	0.698	1.42286221392377e-311	DN
Gm6377	1.41090855726005e-314	0.446801	0.235	0.002	2.16151190972239e-310	NC
Snx18	3.06330943514059e-313	-0.624155	0.476	0.841	0	DN
Arhgdib	1.40285099591203e-312	0.618077	0.889	0.861	0	UP
Rpl35a	1.45909432485411e-310	0.46718	0.995	0.994	2.23533e-306	NC
Tkt	1.53928476086055e-310	0.652866	0.778	0.584	2.35818e-306	UP
Mgat4a	4.83578801281511e-310	-0.648673	0.371	0.781	7.40843e-306	DN
Samd9l	0	0.407722	0.269	0.008	1.78552e-305	NC
Ppcdc	0	-0.638185	0.256	0.703	3.22697e-305	DN
Cnn2	0	0.648634	0.466	0.103	1.09335e-304	UP
Ptger4	3.97038e-308	0.468013	0.248	0.005	6.08262e-304	NC
Pirb	4.06505e-307	0.658372	0.5	0.125	6.22766e-303	UP
Nr4a1	1.78011e-306	1.14007	0.628	0.26	2.72713e-302	UP
Pstpip1	2.111e-306	0.397414	0.302	0.018	3.23406e-302	NC
Tjp1	2.17643e-306	-0.655495	0.173	0.619	3.33429e-302	DN
Metrnl	2.57216e-306	0.710615	0.366	0.048	3.94055e-302	UP
Cox4i1	4.99567e-306	0.480107	0.957	0.944	7.65336e-302	NC
Man1a2	6.66801e-305	-0.639178	0.474	0.829	1.02154e-300	DN
Hp	1.54325e-303	1.24264	0.225	0.002	2.36426e-299	UP
Jmjd1c	7.87566e-303	-0.649262	0.563	0.864	1.20655e-298	DN
Anp32b	9.02585e-303	0.674592	0.752	0.477	1.38276e-298	UP
Whrn	1.77977e-301	-0.600468	0.086	0.514	2.72661e-297	DN
Tmcc3	9.79117e-301	-0.657673	0.39	0.791	1.50001e-296	DN
St3gal5	4.15961e-300	-0.650926	0.327	0.735	6.37252e-296	DN
Snn	1.45334e-299	-0.573068	0.093	0.52	2.22651e-295	DN
Selenow	1.90136e-299	0.687279	0.662	0.317	2.91289e-295	UP
Xist	2.46288e-299	-0.564653	0.862	0.98	3.77313e-295	DN
Klk8	1.16238e-298	-0.637805	0.28	0.717	1.78077e-294	DN
Ssh2	1.23936e-298	-0.638049	0.688	0.932	1.8987e-294	DN
Ang	2.05853e-297	-0.620073	0.314	0.752	3.15366e-293	DN
Dbi	9.15219e-297	0.650027	0.719	0.48	1.40212e-292	UP
Pnp	2.60488e-296	-0.539422	0.658	0.917	3.99068e-292	DN
Slc29a3	7.56606e-295	-0.584603	0.513	0.863	1.15912e-290	DN
Vav3	3.36411e-294	0.297927	0.208	0	5.15382e-290	NC
Plaur	7.60856e-294	0.82244	0.428	0.099	1.16563e-289	UP
Daglb	1.36992e-293	-0.591485	0.453	0.824	2.09872e-289	DN
C3	4.07304e-293	0.509451	0.21	0.001	6.2399e-289	UP
H2afj	4.09816e-293	0.671462	0.677	0.378	6.27838e-289	UP
Bcl2a1b	7.9118e-293	0.656209	0.66	0.699	1.21209e-288	UP
Sirpb1c	6.10943e-292	0.459045	0.207	0	9.35965e-288	NC
Txn1	1.80086e-291	0.710996	0.686	0.399	2.75892e-287	UP
Arhgap45	2.70989e-291	-0.578669	0.676	0.913	4.15155e-287	DN
Rpl37	3.28782e-291	0.466772	0.986	0.99	5.03693e-287	NC
Rps6	3.58814e-291	0.489272	0.968	0.966	5.49703e-287	NC
Bin2	1.85192e-290	-0.552031	0.653	0.904	2.83714e-286	DN
Ptma	3.6309e-289	0.568454	0.972	0.969	5.56254e-285	UP
Dusp7	9.57091e-289	-0.597103	0.139	0.564	1.46626e-284	DN
Gda	2.13962e-288	0.511635	0.215	0.002	3.27789e-284	UP
Tmem100	4.17001e-287	-0.565549	0.065	0.468	6.38846e-283	DN
Tmsb4x	1.26086e-286	0.398695	0.998	1	1.93163e-282	NC
Lpcat3	3.44407e-286	-0.6205	0.251	0.666	5.27632e-282	DN
Retreg1	3.44638e-286	-0.578576	0.488	0.836	5.27985e-282	DN
Rpl31	5.17743e-286	0.503524	0.89	0.791	7.93182e-282	UP
Zbp1	5.99436e-286	0.440019	0.239	0.006	9.18336e-282	NC
H2-DMb1	2.498e-285	0.684725	0.614	0.674	3.82693e-281	UP
Klra2	7.24964e-284	0.430635	0.209	0.001	1.11064e-279	NC
Coro1a	4.08299e-283	0.656519	0.917	0.928	6.25514e-279	UP
Col27a1	9.98568e-283	-0.618453	0.183	0.616	1.52981e-278	DN
Itgal	1.0532e-282	0.754591	0.211	0.002	1.6135e-278	UP
Cstb	1.05724e-282	0.855433	0.672	0.405	1.6197e-278	UP
Slc40a1	1.74933e-282	-0.588578	0.167	0.61	2.67997e-278	DN
Prdx1	3.20455e-282	0.618073	0.868	0.78	4.90937e-278	UP
Clec4a1	1.18496e-281	0.604335	0.311	0.029	1.81537e-277	UP
Sgce	2.77108e-281	-0.580604	0.177	0.608	4.2453e-277	DN
Fosl2	4.36107e-280	0.653259	0.385	0.069	6.68116e-276	UP
Timp2	5.01573e-279	-0.281162	0.643	0.955	7.68409e-275	NC
Ski	2.77362e-278	-0.599301	0.408	0.78	4.24918e-274	DN
Glipr1	3.56615e-278	0.537665	0.418	0.079	5.46335e-274	UP
Clic4	8.33255e-278	0.572232	0.341	0.039	1.27655e-273	UP
Uqcrh	3.41291e-277	0.513036	0.906	0.827	5.22857e-273	UP
Son	3.68396e-277	-0.486633	0.843	0.971	5.64383e-273	NC
Hpgd	9.59256e-276	-0.469013	0.603	0.925	1.46958e-271	NC
Mgst1	8.03043e-275	0.778609	0.204	0.002	1.23026e-270	UP
Cox8a	1.30269e-273	0.48312	0.931	0.894	1.99573e-269	NC
Flna	5.91308e-273	0.732316	0.478	0.147	9.05884e-269	UP
Ifi209	8.9692e-273	0.587455	0.302	0.028	1.37408e-268	UP
Ear2	1.60739e-272	0.909209	0.2	0.001	2.46252e-268	UP
Hspa8	3.53633e-272	0.554612	0.973	0.982	5.41766e-268	UP
Grap	5.36937e-272	-0.580418	0.146	0.555	8.22588e-268	DN
Pitpna	5.70085e-272	0.594695	0.766	0.602	8.7337e-268	UP
Ctc1	2.3896e-271	-0.588139	0.249	0.662	3.66087e-267	DN
Itgax	2.74216e-271	0.417341	0.287	0.022	4.201e-267	NC
Arpc3	4.84548e-271	0.451049	0.919	0.907	7.42328e-267	NC
Aldh2	1.01363e-270	0.666183	0.613	0.312	1.55288e-266	UP
Grn	2.86257e-270	-0.337116	0.836	0.985	4.38546e-266	NC
Dpp4	5.61036e-270	0.297738	0.194	0	8.59507e-266	NC
Pwwp2a	5.80176e-270	-0.618806	0.294	0.698	8.88829e-266	DN
B2m	2.83021e-269	0.46417	0.979	0.993	4.33588e-265	NC
Ntpcr	4.73398e-269	-0.583793	0.408	0.784	7.25246e-265	DN
Atp5l	1.3197e-267	0.523969	0.86	0.75	2.02178e-263	UP
4930523C07Rik	1.88875e-267	0.410556	0.267	0.016	2.89356e-263	NC
Ly6c2	9.73687e-267	1.3083	0.193	0.001	1.49169e-262	UP
Gm21188	1.673e-266	0.35769	0.19	0	2.56304e-262	NC
Upk1b	2.32902e-266	-0.637177	0.08	0.467	3.56806e-262	DN
Gcnt1	5.76632e-266	-0.597619	0.204	0.614	8.834e-262	DN
Sp100	6.352e-266	0.613249	0.417	0.088	9.73127e-262	UP
Rps23	7.40134e-266	0.418223	0.989	0.992	1.13389e-261	NC
AI839979	1.54858e-264	0.362461	0.19	0	2.37242e-260	NC
Rsrp1	1.4887e-263	-0.49543	0.803	0.963	2.28068e-259	NC
Tbxas1	3.67538e-263	-0.567412	0.369	0.756	5.63069e-259	DN
Nr4a2	1.986e-262	0.565108	0.208	0.003	3.04255e-258	UP
Rgs18	7.21332e-262	0.25282	0.187	0	1.10508e-257	NC
Rpl5	4.96808e-261	0.461004	0.968	0.972	7.6111e-257	NC
Rpl12	7.39069e-261	0.490187	0.967	0.979	1.13225e-256	NC
Atp5e	1.72404e-260	0.50425	0.898	0.817	2.64122e-256	UP
Eef1b2	1.93801e-260	0.462193	0.958	0.95	2.96904e-256	NC
Mgll	4.29493e-260	-0.547383	0.116	0.522	6.57983e-256	DN
Neat1	9.10047e-260	0.896815	0.713	0.354	1.39419e-255	UP
Il21r	9.52349e-260	-0.566994	0.291	0.694	1.459e-255	DN
Sema4a	1.72249e-259	0.340157	0.276	0.019	2.63886e-255	NC
Arl5c	1.7884e-259	0.816143	0.555	0.187	2.73983e-255	UP
Gpr183	6.95438e-259	-0.699051	0.493	0.837	1.06541e-254	DN
Laptm4a	4.41677e-258	-0.465959	0.782	0.945	6.76649e-254	NC
Samhd1	4.87544e-258	0.820668	0.62	0.41	7.46917e-254	UP
Prdx6	6.93062e-258	0.769104	0.562	0.252	1.06177e-253	UP
Herc2	1.13641e-256	-0.589642	0.378	0.752	1.74098e-252	DN
Serinc1	3.11427e-256	-0.522006	0.572	0.863	4.77106e-252	DN
Dst	4.85425e-256	-0.583251	0.361	0.764	7.43672e-252	DN
Hint1	5.74213e-256	0.490302	0.861	0.754	8.79695e-252	NC
Lmo1	1.91899e-255	0.326405	0.181	0	2.93989e-251	NC
Rin2	4.12237e-254	-0.57413	0.316	0.707	6.31547e-250	DN
Myo5a	5.19142e-254	0.368363	0.309	0.032	7.95326e-250	NC
Ptprc	9.97629e-254	0.61569	0.885	0.858	1.52837e-249	UP
Adora3	5.81115e-253	-0.566101	0.176	0.587	8.90268e-249	DN
Arpc2	2.79578e-252	0.43174	0.938	0.95	4.28313e-248	NC
Foxn3	8.78357e-252	-0.564145	0.51	0.83	1.34564e-247	DN
Ppp1r9a	1.169e-251	-0.576708	0.205	0.621	1.79091e-247	DN
Atp8b4	1.71014e-251	0.247714	0.178	0	2.61994e-247	NC
Abca9	8.8682e-251	-0.620124	0.397	0.753	1.35861e-246	DN
Thrsp	3.53499e-250	-0.55784	0.145	0.554	5.4156e-246	DN
Atp6v0b	7.70292e-250	-0.371811	0.895	0.99	1.18009e-245	NC
Pkm	1.15319e-249	0.634083	0.828	0.702	1.76669e-245	UP
Tgfbr2	1.21912e-249	-0.537864	0.436	0.791	1.8677e-245	DN
Ints6l	6.12669e-249	-0.592181	0.226	0.616	9.38609e-245	DN
Pira2	7.63118e-249	0.267942	0.204	0.004	1.1691e-244	NC
Fabp5	1.55575e-248	0.763535	0.264	0.023	2.38341e-244	UP
Pfn1	1.07486e-247	0.427329	0.963	0.983	1.64669e-243	NC
Ldlr	1.16086e-247	0.390664	0.227	0.009	1.77844e-243	NC
Jaml	1.33676e-247	0.319262	0.176	0	2.04792e-243	NC
Diaph1	1.10872e-245	0.558476	0.497	0.146	1.69857e-241	UP
Rbm3	6.66333e-245	0.534789	0.805	0.665	1.02082e-240	UP
Snrnp70	5.15598e-244	-0.526892	0.689	0.906	7.89895e-240	DN
Pmaip1	2.05505e-243	0.688712	0.351	0.062	3.14833e-239	UP
Gns	1.22712e-242	-0.497813	0.565	0.871	1.87995e-238	NC
Ifrd1	3.84262e-242	0.897716	0.575	0.315	5.88689e-238	UP
Gas7	2.10209e-241	0.250595	0.189	0.002	3.2204e-237	NC
Mtus1	2.66779e-241	-0.566373	0.344	0.719	4.08706e-237	DN
Tmem51	3.19849e-241	0.270992	0.177	0.001	4.90009e-237	NC
Chd9	5.5184e-241	-0.599737	0.415	0.749	8.45419e-237	DN
Ccl6	7.18419e-241	0.840918	0.661	0.521	1.10062e-236	UP
Il6st	7.93486e-241	-0.578572	0.251	0.621	1.21562e-236	DN
Chil3	1.07997e-240	1.81889	0.173	0	1.65452e-236	UP
Taldo1	1.68429e-237	0.584407	0.84	0.763	2.58033e-233	UP
Eef2k	4.34113e-236	-0.53893	0.173	0.563	6.65061e-232	DN
Tgfbi	4.38538e-236	0.719	0.406	0.184	6.7184e-232	UP
Arpc5	4.66961e-236	0.521613	0.835	0.698	7.15384e-232	UP
Slc2a6	7.11609e-236	0.263066	0.19	0.003	1.09019e-231	NC
Ptp4a3	1.0795e-235	-0.541848	0.287	0.663	1.6538e-231	DN
Dip2b	4.00408e-235	-0.543594	0.289	0.663	6.13425e-231	DN
S100a9	5.66536e-235	2.80747	0.272	0.024	8.67933e-231	UP
Dna2	7.51551e-235	0.277587	0.23	0.011	1.15138e-230	NC
Atp5h	1.6117e-234	0.472641	0.889	0.812	2.46912e-230	NC
Sgk1	2.27187e-234	-0.628405	0.46	0.826	3.48051e-230	DN
F13a1	4.0713e-234	0.810907	0.181	0.002	6.23724e-230	UP
Eif3h	5.28172e-233	0.471826	0.853	0.751	8.0916e-229	NC
Stxbp6	6.81854e-233	0.24506	0.179	0.002	1.0446e-228	NC
Fam212a	7.84257e-233	-0.510921	0.122	0.505	1.20148e-228	DN
Ucp2	3.99996e-232	0.506383	0.883	0.853	6.12793e-228	UP
Agpat4	1.52203e-231	0.448043	0.318	0.045	2.33175e-227	NC
Mlxipl	3.56605e-231	-0.503581	0.115	0.49	5.46319e-227	DN
Atp1a3	8.3895e-231	0.354954	0.224	0.012	1.28527e-226	NC
Sall3	9.22484e-231	-0.582139	0.113	0.482	1.41325e-226	DN
Gas6	1.02403e-230	-0.489871	0.216	0.621	1.56881e-226	NC
Rps17	3.71076e-230	0.448782	0.936	0.886	5.68489e-226	NC
Pabpc1	4.94158e-230	0.460657	0.939	0.885	7.5705e-226	NC
Hexa	9.68378e-229	-0.34915	0.863	0.981	1.48356e-224	NC
Myo1g	7.61885e-228	0.611333	0.42	0.114	1.16721e-223	UP
Spn	9.26105e-228	0.438379	0.168	0.001	1.41879e-223	NC
Cd300lg	9.33748e-228	0.215929	0.166	0.001	1.4305e-223	NC
Rpl30	1.30633e-227	0.39414	0.99	0.996	2.0013e-223	NC
Ptgs2	4.39875e-227	0.807885	0.258	0.021	6.73889e-223	UP
Mbnl1	6.57288e-227	-0.459138	0.811	0.958	1.00696e-222	NC
Tmem50a	7.44071e-227	-0.403411	0.832	0.953	1.13992e-222	NC
Atraid	8.0233e-227	-0.496515	0.513	0.812	1.22917e-222	NC
Pnisr	1.66134e-226	-0.548268	0.577	0.845	2.54518e-222	DN
Rasgrp2	6.46816e-226	0.415092	0.182	0.003	9.90922e-222	NC
Man2b1	1.54059e-225	-0.39696	0.854	0.975	2.36018e-221	NC
Ehd1	3.05185e-225	0.373599	0.232	0.015	4.67543e-221	NC
Krt80	6.81967e-225	0.279818	0.167	0.001	1.04477e-220	NC
Npc2	2.19906e-224	0.433733	0.959	0.979	3.36897e-220	NC
Cd72	5.2428e-224	0.541723	0.283	0.038	8.03197e-220	UP
Lrrc3	2.21695e-223	-0.510459	0.186	0.574	3.39636e-219	DN
P2ry6	7.28574e-223	-0.561003	0.487	0.808	1.11618e-218	DN
Sipa1	2.1174e-222	-0.531921	0.397	0.715	3.24385e-218	DN
Gapdh	2.1212e-222	0.518433	0.938	0.941	3.24967e-218	UP
Prdx5	2.27315e-222	0.690511	0.832	0.768	3.48246e-218	UP
3222401L13Rik	2.98563e-222	-0.501418	0.077	0.429	4.57398e-218	DN
H2-Q7	1.9061e-221	0.520869	0.35	0.068	2.92015e-217	UP
Gsr	2.05005e-220	0.773661	0.341	0.132	3.14068e-216	UP
P4ha1	2.68329e-220	-0.541429	0.454	0.794	4.1108e-216	DN
Xdh	4.38287e-220	0.262366	0.16	0	6.71456e-216	NC
Capza2	5.22232e-220	-0.363831	0.907	0.985	8.00059e-216	NC
Fn1	5.28885e-220	1.08471	0.175	0.004	8.10251e-216	UP
Gm9733	2.41597e-219	0.43097	0.158	0	3.70126e-215	NC
Ccdc88c	3.54636e-219	0.358422	0.162	0.001	5.43303e-215	NC
Iffo1	8.94518e-219	-0.532871	0.166	0.53	1.3704e-214	DN
Gpr155	1.12636e-218	-0.515942	0.176	0.544	1.72559e-214	DN
Plec	3.64145e-218	0.323778	0.237	0.017	5.57871e-214	NC
Irf7	5.82448e-218	0.547113	0.216	0.013	8.9231e-214	UP
Fmnl3	8.02802e-218	-0.498756	0.19	0.563	1.22989e-213	NC
Ubash3b	9.26799e-218	-0.548933	0.282	0.625	1.41986e-213	DN
Cd14	1.87016e-217	0.53209	0.635	0.853	2.86508e-213	UP
Gng5	5.2993e-217	0.435805	0.932	0.917	8.11853e-213	NC
Psma7	1.06174e-216	0.518595	0.811	0.695	1.62658e-212	UP
Rpl21	2.05114e-216	0.374136	0.988	0.996	3.14235e-212	NC
Rab14	9.64736e-216	-0.419215	0.823	0.95	1.47798e-211	NC
Nap1l1	9.66359e-215	0.548889	0.649	0.336	1.48046e-210	UP
Hopx	1.6117e-213	0.306015	0.17	0.002	2.46912e-209	NC
Shtn1	2.67363e-213	0.245335	0.192	0.006	4.09599e-209	NC
Atp2c1	3.23154e-213	-0.635268	0.479	0.78	4.95072e-209	DN
Psmb8	4.81419e-213	0.4496	0.845	0.802	7.37534e-209	NC
Cd244	5.34097e-213	0.369667	0.237	0.018	8.18237e-209	NC
Clec2i	1.89728e-212	0.262397	0.171	0.002	2.90664e-208	NC
Plxnd1	3.18795e-212	0.200944	0.157	0.001	4.88394e-208	NC
Phf14	1.57894e-211	-0.530209	0.403	0.727	2.41894e-207	DN
Rpl22l1	1.94735e-211	0.521317	0.81	0.66	2.98334e-207	UP
Ahr	7.6451e-211	0.320685	0.178	0.004	1.17123e-206	NC
Eif1	5.95131e-210	0.358409	0.973	0.99	9.11741e-206	NC
Pdgfb	2.33889e-209	-0.595527	0.361	0.726	3.58317e-205	DN
Ifi211	3.13077e-209	0.306821	0.151	0	4.79635e-205	NC
Arhgef40	4.81465e-209	-0.508539	0.152	0.508	7.37604e-205	DN
Abcc3	9.31789e-209	-0.480232	0.123	0.473	1.4275e-204	NC
St6galnac4	1.39489e-208	-0.494433	0.304	0.661	2.13697e-204	NC
Git2	7.26878e-208	-0.543553	0.563	0.822	1.11358e-203	DN
Eef2	1.39057e-207	0.390953	0.929	0.93	2.13035e-203	NC
Abhd6	4.86107e-207	-0.500826	0.171	0.536	7.44717e-203	DN
Gm34084	5.37064e-207	0.351065	0.188	0.007	8.22782e-203	NC
Agmo	9.02357e-207	-0.463154	0.106	0.448	1.38241e-202	NC
Atp5d	1.22956e-206	0.446415	0.838	0.713	1.88368e-202	NC
H2-DMa	1.61518e-206	0.577657	0.729	0.744	2.47446e-202	UP
Cebpb	2.16538e-206	0.90319	0.768	0.824	3.31736e-202	UP
Fgl2	2.36213e-206	0.478036	0.298	0.047	3.61879e-202	NC
Lmo2	4.68091e-206	-0.474339	0.599	0.855	7.17115e-202	NC
S100a8	1.47351e-205	2.44716	0.227	0.017	2.25742e-201	UP
Ywhah	5.07749e-205	-0.392963	0.829	0.963	7.77872e-201	NC
Eif5a	8.10261e-205	0.458326	0.864	0.792	1.24132e-200	NC
Cox5b	1.57976e-204	0.468408	0.825	0.666	2.4202e-200	NC
Plod1	2.60173e-204	-0.498166	0.223	0.582	3.98586e-200	NC
Bhlhe41	5.66784e-204	-0.515498	0.264	0.645	8.68312e-200	DN
0610040J01Rik	1.04689e-203	-0.477198	0.182	0.538	1.60383e-199	NC
Pou2f2	4.24851e-203	-0.410867	0.68	0.918	6.50872e-199	NC
Gadd45b	6.13044e-203	0.952026	0.477	0.157	9.39184e-199	UP
BC037034	9.34468e-203	-0.506744	0.217	0.567	1.4316e-198	DN
Wasf2	1.4995e-201	-0.462974	0.736	0.897	2.29723e-197	NC
Gm15987	1.62592e-201	0.242685	0.142	0	2.49091e-197	NC
Pald1	1.73282e-201	-0.453898	0.129	0.475	2.65468e-197	NC
Fam91a1	4.32908e-201	-0.496964	0.242	0.591	6.63215e-197	NC
Soga1	6.05231e-201	-0.49643	0.196	0.541	9.27214e-197	NC
Prkca	6.54132e-201	-0.444436	0.087	0.42	1.00213e-196	NC
Clec4e	8.84437e-201	0.477126	0.148	0.001	1.35496e-196	NC
Phgdh	1.08345e-200	-0.469333	0.226	0.602	1.65985e-196	NC
mt-Nd2	4.64519e-200	-0.382067	0.941	0.987	7.11643e-196	NC
Rgs2	4.26674e-199	-0.500156	0.703	0.929	6.53665e-195	DN
Tnfsf9	1.25005e-198	1.12853	0.304	0.06	1.91507e-194	UP
Rock2	2.8193e-198	-0.526917	0.542	0.79	4.31917e-194	DN
Tcf4	8.81068e-198	-0.512195	0.505	0.793	1.3498e-193	DN
Cmtm7	1.14635e-197	-0.449715	0.703	0.905	1.75621e-193	NC
Atp8a2	1.33274e-197	-0.469379	0.173	0.535	2.04176e-193	NC
Ppia	2.84e-196	0.365662	0.979	0.994	4.35088e-192	NC
Capn3	6.87923e-196	-0.456332	0.159	0.514	1.0539e-191	NC
Akirin2	1.31311e-195	-0.479726	0.506	0.78	2.01169e-191	NC
Pdlim1	2.40405e-195	0.235174	0.14	0	3.683e-191	NC
Rps27	7.92285e-195	0.430522	0.979	0.986	1.21378e-190	NC
Rnase6	1.10191e-194	0.567046	0.427	0.154	1.68813e-190	UP
Tspan14	1.01586e-193	-0.471851	0.35	0.684	1.55629e-189	NC
Cox5a	1.04659e-193	0.46577	0.785	0.638	1.60337e-189	NC
Garnl3	1.35559e-193	-0.462428	0.082	0.41	2.07677e-189	NC
Rftn1	1.61622e-193	0.346061	0.31	0.052	2.47606e-189	NC
Mlph	2.85208e-193	-0.46303	0.139	0.492	4.36939e-189	NC
Ramp1	4.01959e-193	0.523316	0.596	0.277	6.15801e-189	UP
Tspan4	1.29583e-192	-0.457902	0.218	0.582	1.98521e-188	NC
Csf3r	2.36588e-192	-0.4496	0.447	0.781	3.62453e-188	NC
Tacc1	3.5904e-191	-0.480777	0.637	0.84	5.5005e-187	NC
2020-09-09	5.79185e-191	0.357384	0.271	0.039	8.87311e-187	NC
Snta1	4.55668e-190	-0.456181	0.185	0.53	6.98084e-186	NC
Cox6c	5.86262e-190	0.458043	0.842	0.727	8.98153e-186	NC
Inpp4b	1.34374e-189	-0.481547	0.161	0.501	2.05862e-185	NC
Picalm	4.77842e-189	-0.439761	0.839	0.965	7.32054e-185	NC
Ttc28	1.14544e-188	-0.502937	0.177	0.52	1.75482e-184	DN
Zfp652	1.44389e-188	-0.509897	0.384	0.687	2.21204e-184	DN
Rnd3	5.14063e-188	0.240353	0.139	0.001	7.87545e-184	NC
Nedd9	6.83477e-188	0.295015	0.185	0.009	1.04709e-183	NC
Kif21b	7.3984e-188	-0.497855	0.267	0.603	1.13343e-183	NC
Hmgb2	7.42134e-188	0.898548	0.67	0.424	1.13695e-183	UP
Glipr2	4.6749e-187	0.220803	0.149	0.002	7.16195e-183	NC
Tpd52	8.23759e-187	0.544034	0.716	0.541	1.262e-182	UP
Rgmb	1.40051e-186	-0.440519	0.126	0.459	2.14557e-182	NC
Cox7c	2.85991e-186	0.400296	0.879	0.813	4.38139e-182	NC
Cd34	3.15923e-186	-0.514293	0.248	0.603	4.83994e-182	DN
Edem2	3.71563e-186	-0.458506	0.428	0.718	5.69235e-182	NC
Ulk2	3.76561e-186	-0.480687	0.234	0.575	5.76892e-182	NC
Pla2g7	3.81215e-186	0.543568	0.18	0.01	5.84021e-182	UP
Plxnc1	4.74235e-186	0.192774	0.151	0.002	7.26528e-182	NC
Mcfd2	2.26446e-185	-0.458145	0.3	0.632	3.46916e-181	NC
Adam10	2.44455e-185	-0.475491	0.454	0.752	3.74506e-181	NC
Sbf2	3.17003e-185	-0.460414	0.149	0.487	4.85649e-181	NC
Lpl	3.64475e-185	0.753278	0.248	0.038	5.58376e-181	UP
Jam2	4.99235e-185	-0.428254	0.134	0.475	7.64828e-181	NC
Dusp5	8.46449e-185	0.39663	0.198	0.015	1.29676e-180	NC
Stx3	5.62626e-184	0.214988	0.185	0.009	8.61943e-180	NC
Glud1	2.65318e-183	0.506422	0.703	0.501	4.06468e-179	UP
Klrk1	4.73342e-183	0.334792	0.144	0.002	7.25161e-179	NC
Nfil3	1.79497e-182	0.536237	0.264	0.047	2.74989e-178	UP
Zyx	3.24617e-182	0.50429	0.519	0.293	4.97313e-178	UP
Cep68	4.10025e-182	-0.421234	0.076	0.378	6.28159e-178	NC
Cox6b1	6.87046e-182	0.425493	0.863	0.763	1.05255e-177	NC
Hhex	8.54537e-182	-0.495472	0.317	0.639	1.30915e-177	NC
Klhdc8b	9.76322e-182	-0.383509	0.049	0.34	1.49573e-177	NC
Pglyrp1	1.5417e-181	0.702398	0.162	0.006	2.36188e-177	UP
Cyba	1.59713e-181	0.365332	0.98	0.993	2.4468e-177	NC
Csf2ra	1.61016e-181	0.5295	0.695	0.432	2.46676e-177	UP
Mfng	2.46344e-181	-0.462154	0.254	0.578	3.77399e-177	NC
Fus	5.69037e-181	-0.420081	0.742	0.919	8.71764e-177	NC
Sulf2	9.30147e-181	0.24104	0.226	0.022	1.42499e-176	NC
Rps27l	9.49791e-181	0.478006	0.736	0.558	1.45508e-176	NC
Nfkbiz	1.55014e-180	0.763192	0.591	0.298	2.37481e-176	UP
Cables1	3.20823e-179	-0.443153	0.119	0.441	4.91502e-175	NC
Clasp2	6.81625e-179	-0.477531	0.254	0.575	1.04425e-174	NC
Clec2d	6.9741e-179	0.545224	0.475	0.173	1.06843e-174	UP
Xylt1	5.3046e-178	0.232229	0.172	0.008	8.12664e-174	NC
Msrb2	6.02722e-178	-0.426745	0.131	0.453	9.2337e-174	NC
Asph	6.74004e-178	-0.435685	0.526	0.817	1.03257e-173	NC
Tubgcp5	7.95652e-178	-0.488927	0.219	0.556	1.21894e-173	NC
Ier2	1.63526e-177	0.631969	0.689	0.341	2.50522e-173	UP
Tnfaip8l2	4.53853e-177	-0.430858	0.635	0.862	6.95303e-173	NC
Pura	5.81739e-177	-0.465629	0.492	0.757	8.91224e-173	NC
Tmem37	7.76401e-177	-0.42477	0.313	0.667	1.18945e-172	NC
Rilpl1	6.78174e-176	-0.421496	0.163	0.5	1.03896e-171	NC
Itpr2	7.30402e-176	-0.490628	0.361	0.668	1.11898e-171	NC
Nr4a3	1.17882e-175	0.417236	0.21	0.02	1.80596e-171	NC
Gpr84	2.35722e-175	-0.348953	0.202	0.55	3.61126e-171	NC
Rpl36a	2.37048e-175	0.406325	0.936	0.912	3.63158e-171	NC
Lrrc8c	3.04725e-175	0.241682	0.17	0.008	4.66839e-171	NC
Pdlim4	6.30919e-175	-0.435943	0.245	0.589	9.66568e-171	NC
Arhgap26	7.7603e-175	0.273306	0.204	0.017	1.18888e-170	NC
Clstn1	1.76807e-174	-0.395468	0.097	0.411	2.70868e-170	NC
Tmed7	2.40189e-174	-0.443677	0.476	0.723	3.67969e-170	NC
Maml3	2.62106e-174	-0.470081	0.188	0.514	4.01546e-170	NC
Tpp1	2.89595e-174	-0.448416	0.476	0.775	4.4366e-170	NC
Slfn1	1.31398e-173	0.28974	0.127	0	2.01301e-169	NC
Gpr171	2.44146e-173	0.27175	0.122	0	3.74031e-169	NC
Cryl1	5.64749e-173	-0.448525	0.219	0.534	8.65195e-169	NC
Abca1	6.94868e-173	-0.313061	0.373	0.72	1.06454e-168	NC
Asah1	8.36079e-173	-0.357957	0.793	0.945	1.28087e-168	NC
Plekhg3	8.64411e-173	0.165129	0.129	0.001	1.32428e-168	NC
Lyn	2.63257e-172	-0.352058	0.808	0.945	4.0331e-168	NC
Irf2bpl	4.02584e-172	-0.486277	0.201	0.526	6.16758e-168	NC
Rbms1	6.5781e-172	0.43506	0.466	0.164	1.00776e-167	NC
Hps4	2.51717e-171	-0.452997	0.27	0.601	3.8563e-167	NC
Ets1	2.98124e-171	-0.402585	0.162	0.498	4.56727e-167	NC
Sik1	3.51296e-171	0.286306	0.203	0.018	5.38186e-167	NC
Skint3	1.11971e-170	0.296146	0.182	0.012	1.7154e-166	NC
Pld4	1.25515e-170	-0.375517	0.853	0.963	1.9229e-166	NC
Snx17	6.21452e-170	-0.444496	0.476	0.731	9.52065e-166	NC
Rab7b	7.99174e-170	0.215642	0.127	0.001	1.22434e-165	NC
Pld1	8.5522e-170	-0.425697	0.13	0.447	1.3102e-165	NC
Hpse	1.01927e-169	0.177548	0.126	0.001	1.56153e-165	NC
Lhfpl2	1.17741e-169	-0.491895	0.222	0.559	1.80379e-165	NC
Gcn1l1	1.27664e-169	-0.452381	0.215	0.531	1.95582e-165	NC
Kcnk13	5.1155e-169	-0.408513	0.176	0.51	7.83694e-165	NC
Myof	5.75326e-169	0.182069	0.127	0.001	8.81399e-165	NC
Sirpb1b	8.4997e-169	0.180112	0.119	0	1.30215e-164	NC
Mapkapk2	3.62826e-168	0.529686	0.6	0.359	5.55849e-164	UP
Cenpa	5.09106e-168	0.490956	0.234	0.034	7.7995e-164	NC
Il6ra	2.26604e-167	-0.428263	0.612	0.843	3.47157e-163	NC
Tspan3	7.15498e-167	-0.430077	0.338	0.65	1.09614e-162	NC
Acp2	7.90817e-167	-0.44696	0.262	0.593	1.21153e-162	NC
Taz	3.15437e-166	-0.452132	0.288	0.595	4.8325e-162	NC
Clec5a	4.52024e-166	-0.44832	0.276	0.596	6.92501e-162	NC
Bsg	9.96315e-166	-0.210162	0.813	0.958	1.52635e-161	NC
Lrp1	1.2099e-165	-0.382881	0.619	0.865	1.85356e-161	NC
Plcl2	1.5323e-165	-0.450374	0.246	0.559	2.34748e-161	NC
Hk2	4.12519e-165	-0.575883	0.45	0.733	6.31978e-161	DN
Oaz1	4.63178e-165	0.344762	0.951	0.955	7.09588e-161	NC
Rassf4	5.23921e-165	0.50291	0.661	0.447	8.02648e-161	UP
Rpl4	1.0033e-164	0.359775	0.934	0.921	1.53705e-160	NC
Gm32849	1.37796e-164	-0.371354	0.061	0.344	2.11103e-160	NC
Rasal3	3.37232e-164	-0.448261	0.252	0.571	5.1664e-160	NC
Ctsz	3.41295e-164	-0.0618469	0.951	0.999	5.22864e-160	NC
Cd48	4.2494e-164	0.474017	0.767	0.59	6.51008e-160	NC
Specc1	4.82652e-164	-0.461927	0.356	0.665	7.39423e-160	NC
Eng	1.11253e-163	-0.386898	0.134	0.443	1.70439e-159	NC
Mefv	1.26861e-163	0.189165	0.12	0	1.94351e-159	NC
Atp5g2	2.11373e-163	0.367483	0.901	0.877	3.23823e-159	NC
Psme1	3.437e-163	0.437216	0.847	0.739	5.26548e-159	NC
Abl1	5.65281e-163	-0.429227	0.19	0.493	8.66011e-159	NC
Prex1	3.61149e-162	-0.435509	0.491	0.748	5.5328e-158	NC
Dtx4	5.1627e-162	-0.421658	0.169	0.481	7.90926e-158	NC
Myo1b	5.27506e-162	-0.407536	0.088	0.377	8.08139e-158	NC
Havcr2	5.40695e-162	-0.423085	0.472	0.773	8.28345e-158	NC
Rtn1	1.49371e-161	-0.438517	0.192	0.494	2.28836e-157	NC
Dusp2	1.51623e-161	0.795057	0.357	0.095	2.32286e-157	UP
Rpl27	1.74703e-161	0.435753	0.858	0.741	2.67645e-157	NC
F10	2.35296e-161	0.266619	0.118	0	3.60474e-157	NC
Sptbn1	2.73968e-161	0.356162	0.281	0.052	4.19719e-157	NC
Adgre4	4.3359e-161	0.481419	0.167	0.011	6.6426e-157	NC
Cdk5r1	6.35852e-161	-0.402737	0.073	0.359	9.74125e-157	NC
Map4k1	1.56907e-160	0.170042	0.142	0.004	2.40381e-156	NC
Rab11fip1	4.55434e-160	0.177614	0.12	0.001	6.97724e-156	NC
Il3ra	8.32453e-160	0.237575	0.229	0.03	1.27532e-155	NC
Nckap1l	1.11953e-159	-0.418955	0.53	0.758	1.71512e-155	NC
Gp9	1.25857e-159	-0.374299	0.066	0.342	1.92813e-155	NC
Plekho2	1.56436e-159	0.44747	0.458	0.173	2.3966e-155	NC
Etv5	1.56856e-159	-0.378099	0.075	0.349	2.40303e-155	NC
Pilrb2	3.8933e-159	0.251515	0.131	0.002	5.96454e-155	NC
Rps6ka1	6.0562e-159	-0.430956	0.452	0.709	9.2781e-155	NC
Rac2	1.52355e-158	0.474124	0.761	0.641	2.33409e-154	NC
Snx5	2.04469e-158	-0.337532	0.741	0.925	3.13247e-154	NC
Smim5	3.14442e-158	0.147705	0.112	0	4.81725e-154	NC
Ogfrl1	3.58834e-158	-0.455726	0.476	0.727	5.49733e-154	NC
Ubc	3.74154e-158	-0.51972	0.934	0.994	5.73204e-154	DN
Avpi1	8.52547e-158	0.404324	0.204	0.025	1.3061e-153	NC
Rptor	3.55775e-157	-0.421245	0.19	0.498	5.45047e-153	NC
Sell	5.90811e-157	0.315071	0.116	0	9.05122e-153	NC
Cast	9.08992e-157	0.437005	0.479	0.186	1.39258e-152	NC
Orai1	1.26762e-156	-0.400489	0.605	0.832	1.942e-152	NC
Ccnd3	2.57992e-156	0.490271	0.459	0.218	3.95243e-152	NC
Ndfip2	3.96591e-156	-0.417878	0.365	0.655	6.07578e-152	NC
Rab6b	5.54066e-156	-0.406477	0.173	0.485	8.48829e-152	NC
Tsc22d4	8.40156e-156	-0.419873	0.635	0.84	1.28712e-151	NC
Rnaset2a	8.78053e-156	-0.433926	0.333	0.617	1.34518e-151	NC
Rnaset2b	1.16552e-155	-0.429779	0.295	0.592	1.78558e-151	NC
Serpinf1	1.59614e-155	-0.414404	0.098	0.385	2.44529e-151	NC
Fam129a	4.01541e-155	0.453972	0.465	0.197	6.15161e-151	NC
Wnk1	4.2492e-155	-0.401307	0.727	0.899	6.50977e-151	NC
Tm9sf2	4.28924e-155	-0.432478	0.402	0.683	6.57111e-151	NC
H2afy	8.96902e-155	0.452188	0.756	0.704	1.37405e-150	NC
Idh2	1.23547e-154	-0.433176	0.314	0.601	1.89275e-150	NC
Blnk	1.29081e-154	-0.372173	0.387	0.714	1.97752e-150	NC
Pltp	2.38391e-154	0.463829	0.145	0.006	3.65215e-150	NC
F630028O10Rik	2.89069e-154	0.264336	0.127	0.002	4.42854e-150	NC
Zfp90	3.06255e-154	-0.424674	0.2	0.514	4.69182e-150	NC
Abracl	8.16151e-154	0.446734	0.69	0.48	1.25034e-149	NC
Gm5150	1.03343e-153	0.202828	0.109	0	1.58322e-149	NC
Prkab1	1.39011e-153	-0.398967	0.126	0.414	2.12965e-149	NC
Plxnb2	1.68198e-153	-0.40255	0.502	0.761	2.5768e-149	NC
Spint1	3.51348e-153	-0.429613	0.242	0.556	5.38266e-149	NC
Rps21	5.15587e-153	0.324398	0.984	0.992	7.89879e-149	NC
Stk17b	9.3006e-153	0.524683	0.487	0.319	1.42485e-148	UP
Pqlc3	9.91245e-153	0.176015	0.162	0.01	1.51859e-148	NC
Cebpa	1.09432e-152	-0.519176	0.501	0.776	1.67649e-148	DN
B4galt4	1.20726e-152	-0.419466	0.219	0.516	1.84953e-148	NC
Lamp2	1.37564e-152	-0.312118	0.808	0.951	2.10747e-148	NC
Tmem63a	1.53408e-152	-0.416026	0.174	0.471	2.35021e-148	NC
Cltc	1.98913e-152	-0.406799	0.672	0.87	3.04735e-148	NC
Mid1ip1	2.09519e-152	-0.497629	0.344	0.643	3.20983e-148	NC
Rcsd1	2.18816e-152	-0.465906	0.441	0.717	3.35226e-148	NC
Map4k4	4.62617e-152	-0.434126	0.628	0.845	7.08729e-148	NC
Cox7b	8.95013e-152	0.419559	0.737	0.564	1.37116e-147	NC
Kmo	1.86152e-151	0.130918	0.107	0	2.85184e-147	NC
Pgk1	3.69865e-151	0.486465	0.604	0.385	5.66633e-147	NC
Stard3	4.63912e-151	-0.402756	0.387	0.668	7.10713e-147	NC
Akr1b10	1.80632e-150	-0.423608	0.251	0.553	2.76728e-146	NC
Tlr2	1.87117e-150	0.538665	0.578	0.455	2.86663e-146	UP
Nxpe4	2.62959e-150	0.220672	0.115	0.001	4.02853e-146	NC
Nr3c1	3.04052e-150	-0.433351	0.525	0.758	4.65808e-146	NC
Slc7a7	4.24645e-150	-0.430224	0.266	0.564	6.50556e-146	NC
Cd300ld	2.03099e-149	0.377776	0.154	0.009	3.11148e-145	NC
Cd300lb	2.26175e-149	0.209809	0.127	0.003	3.465e-145	NC
Tmem55b	4.45769e-149	-0.405729	0.543	0.788	6.82919e-145	NC
Gch1	5.32975e-149	0.289483	0.231	0.036	8.16518e-145	NC
Pik3cg	7.988e-149	-0.423953	0.259	0.554	1.22376e-144	NC
Mob3b	1.50696e-148	0.171101	0.144	0.006	2.30866e-144	NC
Tnfrsf17	2.17315e-148	-0.345098	0.057	0.32	3.32927e-144	NC
Stx11	7.36168e-148	0.165332	0.118	0.001	1.12781e-143	NC
Ccdc88a	7.52609e-148	0.512732	0.562	0.287	1.153e-143	UP
Nfia	8.39002e-148	-0.42543	0.129	0.413	1.28535e-143	NC
Cd36	1.45913e-147	0.344518	0.117	0.001	2.23539e-143	NC
Ikzf1	3.54615e-147	-0.400939	0.512	0.759	5.4327e-143	NC
Vgll4	7.41036e-147	-0.43656	0.393	0.678	1.13527e-142	NC
Sri	8.766e-147	0.420457	0.682	0.464	1.34295e-142	NC
Klrb1b	1.07966e-146	0.161192	0.106	0	1.65403e-142	NC
Tlr3	2.65703e-146	-0.383484	0.122	0.41	4.07057e-142	NC
Tmed9	2.90259e-146	-0.336525	0.745	0.906	4.44677e-142	NC
Fli1	1.70428e-145	-0.421612	0.383	0.663	2.61095e-141	NC
Slc9a9	2.32612e-145	-0.415844	0.197	0.489	3.56362e-141	NC
Gtf2i	2.98588e-145	-0.40979	0.2	0.481	4.57436e-141	NC
Cryba4	4.22887e-145	-0.41196	0.199	0.506	6.47863e-141	NC
Mfap3	9.08079e-145	-0.420263	0.224	0.505	1.39118e-140	NC
Slpi	1.3536e-144	0.564539	0.11	0.001	2.07371e-140	UP
Gabbr1	2.23685e-144	-0.367369	0.115	0.395	3.42686e-140	NC
Nostrin	2.91924e-144	0.152539	0.118	0.002	4.47227e-140	NC
Dusp1	3.82666e-144	0.72052	0.68	0.4	5.86244e-140	UP
1810011H11Rik	4.87166e-144	-0.389281	0.162	0.457	7.46338e-140	NC
Gm47283	2.41668e-143	-0.468345	0.408	0.665	3.70235e-139	NC
Numa1	6.80973e-143	-0.433452	0.312	0.587	1.04325e-138	NC
Ighm	7.42572e-143	-0.401285	0.602	0.816	1.13762e-138	NC
Arrb2	7.48275e-143	-0.41056	0.451	0.709	1.14636e-138	NC
Csrp2	9.47247e-143	0.190715	0.116	0.002	1.45118e-138	NC
Lilra6	1.0979e-142	0.144879	0.109	0.001	1.68199e-138	NC
Zdhhc20	1.14067e-142	-0.427065	0.317	0.589	1.74751e-138	NC
Cd83	1.38952e-142	0.658671	0.742	0.602	2.12874e-138	UP
Cflar	2.54034e-142	-0.411329	0.493	0.753	3.89179e-138	NC
Evl	7.49864e-142	-0.403276	0.428	0.699	1.14879e-137	NC
Flt3	1.33201e-141	0.160109	0.122	0.003	2.04064e-137	NC
St3gal4	1.72857e-141	0.323804	0.305	0.079	2.64817e-137	NC
Mgat1	1.88879e-141	-0.416268	0.308	0.591	2.89363e-137	NC
Mki67	4.71672e-141	0.438685	0.105	0	7.22602e-137	NC
Nsa2	2.09562e-140	0.423601	0.785	0.618	3.2105e-136	NC
Fam167b	2.34286e-140	-0.371766	0.128	0.412	3.58926e-136	NC
Macf1	3.7757e-140	-0.414096	0.784	0.902	5.78437e-136	NC
Tln2	1.46921e-139	-0.358023	0.081	0.347	2.25083e-135	NC
Celf2	3.18648e-139	-0.393102	0.72	0.873	4.88168e-135	NC
Selenos	3.70161e-139	-0.380714	0.572	0.812	5.67087e-135	NC
Eef1g	4.59384e-139	0.404399	0.799	0.685	7.03777e-135	NC
Ptpra	5.12927e-139	-0.385148	0.532	0.776	7.85804e-135	NC
Ctso	9.49969e-139	-0.379317	0.221	0.514	1.45535e-134	NC
Rabac1	1.08481e-138	-0.331981	0.766	0.899	1.66193e-134	NC
Dnase1l1	1.12181e-138	0.224722	0.211	0.03	1.71861e-134	NC
Chst7	1.76778e-138	-0.369799	0.109	0.381	2.70823e-134	NC
St8sia4	2.86548e-138	0.431414	0.337	0.103	4.38992e-134	NC
Naa35	5.17346e-138	-0.422424	0.328	0.607	7.92573e-134	NC
Hivep3	5.84996e-138	-0.415926	0.255	0.554	8.96214e-134	NC
L1cam	8.03751e-138	0.192881	0.108	0.001	1.23135e-133	NC
Eps8	1.32747e-137	0.345765	0.238	0.047	2.03368e-133	NC
Ldlrad3	1.46248e-137	0.222136	0.114	0.002	2.24052e-133	NC
Pdk1	3.50345e-137	-0.390695	0.154	0.44	5.36729e-133	NC
Dock10	3.78009e-137	-0.410672	0.621	0.826	5.7911e-133	NC
Scn1b	4.2351e-137	-0.395133	0.183	0.477	6.48817e-133	NC
Ms4a4b	8.91073e-137	0.170805	0.101	0	1.36512e-132	NC
Cd300lf	1.3802e-136	0.19777	0.155	0.011	2.11447e-132	NC
Ldlrad4	1.42847e-136	-0.369343	0.148	0.424	2.18841e-132	NC
St3gal1	1.75034e-136	0.213598	0.16	0.013	2.68153e-132	NC
Fos	2.134e-136	0.758049	0.724	0.449	3.26929e-132	UP
Mafg	2.77893e-136	-0.423108	0.41	0.677	4.25732e-132	NC
Rhobtb1	3.1833e-136	-0.332079	0.062	0.31	4.87682e-132	NC
Pdia3	1.41848e-135	-0.235663	0.883	0.979	2.17312e-131	NC
Tgfb1	1.46587e-135	-0.37034	0.785	0.917	2.24571e-131	NC
Cdkn2d	3.35162e-135	0.380863	0.306	0.09	5.13468e-131	NC
Adgre1	5.28619e-135	-0.384442	0.51	0.777	8.09844e-131	NC
Eif3i	9.15311e-135	0.386047	0.715	0.536	1.40226e-130	NC
Uba52	2.14662e-134	0.405041	0.664	0.445	3.28862e-130	NC
Scand1	2.86963e-134	0.409366	0.747	0.602	4.39627e-130	NC
Snx29	4.94293e-134	-0.398559	0.226	0.52	7.57257e-130	NC
Ppfia4	7.69341e-134	-0.378249	0.544	0.785	1.17863e-129	NC
Ccnd2	2.35059e-133	0.308437	0.129	0.006	3.6011e-129	NC
Ggt5	2.57625e-133	-0.333668	0.071	0.316	3.94681e-129	NC
Crybg1	3.26776e-133	0.146138	0.118	0.003	5.0062e-129	NC
Rtn3	1.38207e-132	-0.368904	0.576	0.785	2.11734e-128	NC
Arhgap12	4.46947e-132	-0.395304	0.228	0.511	6.84723e-128	NC
Rel	1.45249e-131	0.528167	0.63	0.49	2.22522e-127	UP
Ccr1	2.4408e-131	0.31572	0.16	0.014	3.73931e-127	NC
Itgav	3.06261e-131	-0.392713	0.27	0.56	4.69192e-127	NC
Camk2d	3.20308e-131	-0.389365	0.413	0.687	4.90712e-127	NC
Arsb	3.77821e-131	-0.398141	0.335	0.624	5.78822e-127	NC
Racgap1	4.16101e-131	0.189485	0.122	0.004	6.37466e-127	NC
Ctsa	4.75264e-131	-0.231141	0.842	0.968	7.28105e-127	NC
Bri3bp	8.82176e-131	0.315058	0.344	0.106	1.35149e-126	NC
Klf3	1.34061e-130	-0.411753	0.49	0.734	2.05382e-126	NC
Isg15	1.50902e-130	0.790319	0.243	0.064	2.31181e-126	UP
Ryr1	2.0815e-130	0.145841	0.102	0.001	3.18886e-126	NC
Thbs1	4.99482e-130	1.16317	0.152	0.03	7.65207e-126	UP
Atp6v0a2	8.15007e-130	-0.389687	0.274	0.543	1.24859e-125	NC
Klf7	1.24784e-129	-0.423408	0.199	0.465	1.9117e-125	NC
Srrm2	3.26456e-129	-0.344264	0.862	0.957	5.00131e-125	NC
1700025G04Rik	4.51801e-129	0.284496	0.258	0.057	6.9216e-125	NC
Tmco1	4.71006e-129	-0.366842	0.566	0.769	7.21581e-125	NC
Parvg	5.09352e-129	-0.362536	0.172	0.432	7.80327e-125	NC
Taf10	5.57427e-129	0.394616	0.726	0.528	8.53978e-125	NC
Scamp5	6.52161e-129	-0.336271	0.097	0.345	9.9911e-125	NC
Calr	8.28795e-129	-0.203802	0.868	0.974	1.26971e-124	NC
Hip1	1.50434e-128	0.292612	0.177	0.022	2.30465e-124	NC
Ifi47	2.88247e-128	0.28333	0.13	0.007	4.41595e-124	NC
Nuak1	3.84757e-128	-0.367234	0.167	0.448	5.89448e-124	NC
Arl1	3.14676e-127	-0.370794	0.516	0.713	4.82084e-123	NC
Oasl2	3.14752e-127	0.288094	0.143	0.011	4.82201e-123	NC
Hsp90b1	3.36821e-127	-0.176733	0.894	0.985	5.1601e-123	NC
Mcl1	4.10045e-127	0.412631	0.909	0.9	6.28189e-123	NC
Rassf3	4.49765e-127	0.330243	0.384	0.136	6.89039e-123	NC
Canx	6.1611e-127	-0.309513	0.783	0.924	9.43881e-123	NC
Fam110a	1.25566e-126	-0.358074	0.115	0.368	1.92368e-122	NC
Rassf2	2.06175e-126	-0.390919	0.325	0.597	3.15859e-122	NC
Lmnb1	2.46573e-126	0.309963	0.256	0.059	3.7775e-122	NC
Dynll1	3.53365e-126	0.402765	0.77	0.663	5.41355e-122	NC
Bst2	4.93723e-126	0.517686	0.713	0.658	7.56384e-122	UP
Smo	7.08941e-126	-0.356153	0.11	0.369	1.0861e-121	NC
Clec4a3	8.72485e-126	0.469166	0.609	0.562	1.33665e-121	NC
Atf3	2.59347e-125	0.603146	0.742	0.489	3.9732e-121	UP
Acads	2.64639e-125	-0.369566	0.328	0.583	4.05427e-121	NC
Rilpl2	3.41491e-125	0.384572	0.35	0.122	5.23165e-121	NC
Mrc1	5.74221e-125	0.413474	0.18	0.029	8.79706e-121	NC
Slc29a1	6.2586e-125	-0.373447	0.236	0.511	9.58818e-121	NC
Aprt	6.33052e-125	0.475212	0.556	0.357	9.69835e-121	NC
Gmpr	8.50993e-125	-0.339828	0.126	0.387	1.30372e-120	NC
Sh3pxd2b	2.73441e-124	0.118399	0.108	0.003	4.18911e-120	NC
Phf11b	2.92863e-124	0.430579	0.325	0.119	4.48665e-120	NC
Ddx5	8.95984e-124	-0.246557	0.932	0.995	1.37265e-119	NC
1110008P14Rik	1.17706e-123	0.229524	0.217	0.039	1.80325e-119	NC
Tspan18	1.35204e-123	-0.268116	0.03	0.234	2.07133e-119	NC
Pik3r1	3.19079e-123	-0.360632	0.523	0.781	4.88829e-119	NC
C5ar2	3.24276e-123	-0.342113	0.086	0.329	4.9679e-119	NC
Arid1a	4.14523e-123	-0.383671	0.489	0.697	6.35049e-119	NC
B430010I23Rik	8.40893e-123	-0.4202	0.109	0.363	1.28825e-118	NC
Plxna4	1.54427e-122	-0.329127	0.082	0.323	2.36582e-118	NC
Jun	1.54909e-122	-0.696094	0.821	0.934	2.3732e-118	DN
Mlec	2.14853e-122	-0.379708	0.462	0.708	3.29155e-118	NC
2010107E04Rik	2.90116e-122	0.399027	0.727	0.54	4.44457e-118	NC
Sec62	4.23113e-122	-0.35911	0.657	0.822	6.48209e-118	NC
Zfp710	4.83273e-122	-0.393164	0.382	0.62	7.40374e-118	NC
Hnmt	6.1077e-122	-0.333232	0.11	0.361	9.357e-118	NC
Luc7l2	6.36239e-122	-0.364675	0.727	0.886	9.74719e-118	NC
Gm6277	7.03986e-122	-0.269704	0.024	0.222	1.07851e-117	NC
Lman1	7.7524e-122	-0.379773	0.414	0.667	1.18767e-117	NC
Gspt1	8.95804e-122	-0.375004	0.534	0.749	1.37237e-117	NC
Atp5c1	1.6093e-121	0.344759	0.825	0.744	2.46544e-117	NC
Snrpe	3.51951e-121	0.376527	0.715	0.529	5.39189e-117	NC
Oas1a	4.16439e-121	0.171358	0.139	0.01	6.37985e-117	NC
Adap2os	8.34553e-121	-0.347125	0.148	0.417	1.27854e-116	NC
Gpr18	9.28583e-121	0.130376	0.106	0.003	1.42259e-116	NC
Rarg	1.33807e-120	0.163363	0.149	0.013	2.04993e-116	NC
Slc25a37	1.90122e-120	-0.361428	0.148	0.396	2.91267e-116	NC
Capn2	3.60547e-120	0.230164	0.214	0.039	5.52358e-116	NC
Ybx3	7.394e-120	0.373547	0.431	0.195	1.13276e-115	NC
Arap3	8.0638e-120	-0.328307	0.116	0.365	1.23537e-115	NC
Tmx4	8.84323e-120	-0.549983	0.277	0.546	1.35478e-115	DN
Stom	9.6526e-120	0.217585	0.193	0.03	1.47878e-115	NC
Calm3	1.51834e-119	0.402714	0.619	0.397	2.3261e-115	NC
Cd84	3.20889e-119	-0.298861	0.535	0.799	4.91602e-115	NC
Klrd1	3.92387e-119	0.498255	0.189	0.06	6.01137e-115	NC
Trim25	4.1534e-119	0.366841	0.308	0.1	6.36301e-115	NC
Mzt2	5.8811e-119	-0.360465	0.228	0.492	9.00985e-115	NC
Zmiz1	1.80549e-118	-0.367415	0.561	0.755	2.766e-114	NC
Nek6	2.38868e-118	-0.342741	0.175	0.447	3.65946e-114	NC
Tmem144	3.47318e-118	-0.316154	0.074	0.306	5.32091e-114	NC
H2-DMb2	3.96612e-118	0.419258	0.181	0.043	6.07609e-114	NC
Il16	4.06478e-118	-0.372346	0.263	0.531	6.22724e-114	NC
Sema4b	4.51496e-118	-0.280615	0.029	0.227	6.91692e-114	NC
Cd180	5.04169e-118	-0.397579	0.432	0.691	7.72386e-114	NC
Igsf6	1.02072e-117	0.462015	0.56	0.333	1.56374e-113	NC
Sort1	1.33349e-117	-0.344764	0.197	0.465	2.0429e-113	NC
Mkln1	1.37909e-117	-0.379194	0.436	0.672	2.11277e-113	NC
Dnm2	1.55335e-117	-0.367435	0.488	0.692	2.37973e-113	NC
Sipa1l2	3.73403e-117	-0.344703	0.156	0.414	5.72053e-113	NC
Slc25a3	4.80941e-117	0.296293	0.877	0.85	7.36801e-113	NC
Zfp697	1.00327e-116	-0.284183	0.031	0.23	1.537e-112	NC
Nisch	1.03357e-116	-0.379505	0.474	0.699	1.58343e-112	NC
Snx6	1.60337e-116	-0.364841	0.515	0.73	2.45636e-112	NC
Med12l	4.44615e-116	-0.281904	0.039	0.241	6.8115e-112	NC
Igf1	5.21746e-116	0.318423	0.103	0.003	7.99316e-112	NC
Tmem135	6.44362e-116	-0.364592	0.233	0.481	9.87162e-112	NC
Fcrl1	1.03448e-115	-0.280272	0.046	0.259	1.58483e-111	NC
Nectin1	1.18764e-115	0.127858	0.105	0.003	1.81947e-111	NC
Ccng2	2.73993e-115	-0.371135	0.245	0.505	4.19758e-111	NC
Bcl3	3.26224e-115	0.20302	0.148	0.015	4.99775e-111	NC
Slc12a2	4.38204e-115	-0.226354	0.283	0.565	6.71329e-111	NC
Naaa	1.03282e-114	0.414241	0.474	0.258	1.58229e-110	NC
Cops4	1.06039e-114	-0.350163	0.383	0.607	1.62453e-110	NC
Tgfa	1.19057e-114	-0.309674	0.093	0.328	1.82395e-110	NC
Bcl9l	1.47789e-114	-0.31365	0.078	0.303	2.26412e-110	NC
Slc3a2	1.55345e-114	-0.319004	0.672	0.869	2.37989e-110	NC
Bbs9	2.3853e-114	-0.298878	0.075	0.299	3.65428e-110	NC
Pygl	3.90966e-114	0.313923	0.228	0.058	5.9896e-110	NC
Adam15	5.05588e-114	-0.354017	0.38	0.635	7.74561e-110	NC
Sh2d1b1	5.38894e-114	0.213554	0.158	0.019	8.25586e-110	NC
Lpar6	7.54703e-114	-0.446836	0.366	0.629	1.15621e-109	NC
Lyl1	7.80418e-114	-0.365567	0.364	0.618	1.1956e-109	NC
Sesn1	8.49343e-114	-0.334527	0.119	0.356	1.30119e-109	NC
Aph1c	9.1196e-114	0.206477	0.187	0.029	1.39712e-109	NC
Emc3	9.24898e-114	-0.361727	0.38	0.622	1.41694e-109	NC
Ldha	9.32289e-114	0.419886	0.754	0.621	1.42827e-109	NC
Cmklr1	1.31897e-113	-0.351405	0.161	0.414	2.02067e-109	NC
Cebpzos	1.443e-113	-0.348571	0.35	0.623	2.21067e-109	NC
Tfe3	2.18221e-113	-0.393064	0.355	0.601	3.34314e-109	NC
Casp8	5.8245e-113	-0.36919	0.413	0.645	8.92313e-109	NC
Kcnk12	6.25998e-113	-0.2992	0.071	0.29	9.59028e-109	NC
Cnrip1	7.7504e-113	-0.290868	0.045	0.253	1.18736e-108	NC
Fam241a	9.60381e-113	0.195207	0.15	0.016	1.4713e-108	NC
Gas2l3	1.48827e-112	0.196802	0.131	0.01	2.28003e-108	NC
Slc37a2	1.76428e-112	-0.339732	0.176	0.44	2.70288e-108	NC
mt-Nd1	2.00404e-112	-0.234209	0.926	0.983	3.07018e-108	NC
Ccnd1	3.13159e-112	-0.15039	0.332	0.598	4.7976e-108	NC
Il1r2	3.45232e-112	0.192557	0.107	0.004	5.28896e-108	NC
Btg1	6.95455e-112	0.486927	0.884	0.896	1.06544e-107	NC
Eif3e	7.8665e-112	0.349495	0.746	0.626	1.20515e-107	NC
Asb2	8.49762e-112	-0.331677	0.111	0.352	1.30184e-107	NC
Slc46a1	1.13258e-111	-0.323243	0.086	0.311	1.73511e-107	NC
Rap2b	1.37568e-111	0.30548	0.322	0.104	2.10755e-107	NC
Klf13	2.54537e-111	0.462464	0.593	0.414	3.89951e-107	NC
Bcl2a1a	3.00601e-111	0.44091	0.378	0.235	4.60521e-107	NC
Nfkbia	3.23527e-111	0.661016	0.826	0.711	4.95644e-107	UP
P2rx7	3.8035e-111	-0.345031	0.22	0.478	5.82696e-107	NC
Hnrnph1	5.13262e-111	-0.358161	0.442	0.665	7.86317e-107	NC
Gpr65	5.44799e-111	0.271063	0.198	0.037	8.34633e-107	NC
Adssl1	6.59942e-111	0.342057	0.319	0.116	1.01103e-106	NC
Cst7	6.71396e-111	0.533005	0.211	0.066	1.02858e-106	UP
Lims1	1.58522e-110	-0.340807	0.569	0.757	2.42856e-106	NC
Prpsap2	1.99067e-110	-0.333395	0.163	0.403	3.04971e-106	NC
Ddah2	4.78032e-110	-0.298768	0.137	0.39	7.32345e-106	NC
Tpbgl	7.00974e-110	-0.312348	0.087	0.314	1.07389e-105	NC
Itga9	7.78507e-110	-0.296152	0.082	0.309	1.19267e-105	NC
Limd1	8.07925e-110	0.265088	0.286	0.082	1.23774e-105	NC
B4galt1	1.52829e-109	-0.370204	0.292	0.531	2.34133e-105	NC
AI504432	1.61611e-109	0.200752	0.17	0.024	2.47588e-105	NC
Gpr35	1.62521e-109	0.26719	0.226	0.051	2.48982e-105	NC
Ssbp4	1.62932e-109	-0.35049	0.486	0.691	2.49612e-105	NC
mt-Nd3	1.7277e-109	-0.379688	0.648	0.823	2.64683e-105	NC
Nos1ap	1.88532e-109	-0.318121	0.077	0.295	2.88831e-105	NC
Spp1	3.13824e-109	0.757476	0.113	0.006	4.80778e-105	UP
Kcnk6	4.19529e-109	-0.347078	0.209	0.471	6.42718e-105	NC
Mdfic	4.25495e-109	0.195079	0.173	0.025	6.51858e-105	NC
Spred1	5.82379e-109	-0.348797	0.217	0.478	8.92204e-105	NC
Tmem44	5.89166e-109	-0.243535	0.017	0.191	9.02602e-105	NC
Cebpd	6.52929e-109	-0.37737	0.375	0.645	1.00029e-104	NC
Tmem30a	7.01287e-109	-0.354331	0.485	0.7	1.07437e-104	NC
Rap1gds1	7.1068e-109	-0.344111	0.4	0.63	1.08876e-104	NC
Agpat3	1.25506e-108	-0.32047	0.255	0.525	1.92275e-104	NC
Papss1	2.04612e-108	-0.350909	0.365	0.606	3.13466e-104	NC
Snx24	2.17808e-108	-0.328328	0.147	0.398	3.33682e-104	NC
Trio	2.18323e-108	-0.363608	0.219	0.466	3.3447e-104	NC
Tspan7	4.13174e-108	-0.295987	0.212	0.483	6.32982e-104	NC
Chchd2	4.46891e-108	0.285926	0.911	0.898	6.84637e-104	NC
Cfl1	4.49357e-108	0.280509	0.952	0.971	6.88414e-104	NC
Csrnp1	8.57291e-108	0.424206	0.372	0.155	1.31337e-103	NC
Lpin2	9.38948e-108	-0.366376	0.362	0.611	1.43847e-103	NC
Nceh1	1.23765e-107	0.28843	0.282	0.083	1.89608e-103	NC
mt-Cytb	1.35898e-107	-0.230465	0.959	0.993	2.08196e-103	NC
Antxr2	1.98928e-107	0.118701	0.109	0.005	3.04758e-103	NC
Tuba1c	2.92011e-107	0.233072	0.213	0.044	4.47362e-103	NC
Stmn1	3.6177e-107	0.650301	0.275	0.204	5.54231e-103	UP
Itpr1	6.62302e-107	0.223749	0.217	0.046	1.01465e-102	NC
Rnf167	6.82451e-107	-0.341569	0.219	0.456	1.04552e-102	NC
Itpripl1	8.66973e-107	-0.328243	0.147	0.386	1.3282e-102	NC
Abcb4	1.13736e-106	-0.285994	0.059	0.27	1.74244e-102	NC
Myo18b	1.24097e-106	-0.228014	0.016	0.186	1.90117e-102	NC
Ptpn22	1.31899e-106	0.216477	0.166	0.024	2.02069e-102	NC
Atp5j2	2.84996e-106	0.330031	0.806	0.717	4.36614e-102	NC
Rbpj	3.89852e-106	0.421027	0.538	0.375	5.97253e-102	NC
Npl	4.05919e-106	-0.298724	0.168	0.427	6.21867e-102	NC
Sft2d2	5.64714e-106	-0.341412	0.275	0.505	8.65141e-102	NC
D8Ertd738e	6.89822e-106	0.352271	0.778	0.659	1.05681e-101	NC
Zfp292	8.69724e-106	-0.391861	0.385	0.605	1.33242e-101	NC
Mob3c	9.32353e-106	-0.413978	0.223	0.473	1.42837e-101	NC
Klf4	1.75029e-105	0.4689	0.428	0.181	2.68144e-101	NC
Iscu	2.39318e-105	-0.32689	0.594	0.757	3.66635e-101	NC
Slc50a1	4.34882e-105	-0.346921	0.396	0.621	6.66239e-101	NC
Mknk1	4.47861e-105	-0.348387	0.277	0.516	6.86123e-101	NC
Wsb1	4.5358e-105	-0.35262	0.472	0.697	6.94884e-101	NC
Man1c1	4.78559e-105	-0.331208	0.344	0.606	7.33153e-101	NC
Arf5	6.44567e-105	0.293538	0.821	0.777	9.87477e-101	NC
B3gnt8	6.56202e-105	0.149124	0.122	0.009	1.0053e-100	NC
Tmem33	1.10531e-104	-0.343582	0.381	0.604	1.69333e-100	NC
Arglu1	2.24689e-104	-0.355468	0.563	0.751	3.44224e-100	NC
Hsp90ab1	2.25967e-104	0.295793	0.967	0.984	3.46181e-100	NC
Alox5ap	2.72154e-104	0.266955	0.817	0.915	4.16941e-100	NC
Comtd1	3.06292e-104	-0.342769	0.226	0.471	4.69239e-100	NC
Cmtm8	5.45021e-104	-0.260641	0.082	0.304	8.34972e-100	NC
Cirbp	5.87014e-104	-0.348141	0.235	0.476	8.99305e-100	NC
Mt1	6.691e-104	0.599376	0.556	0.562	1.02506e-99	UP
Ank2	1.09745e-103	-0.328967	0.171	0.42	1.68129e-99	NC
Actb	1.23655e-103	0.324694	0.998	1	1.8944e-99	NC
Rasgrp4	2.42467e-103	0.198796	0.175	0.029	3.7146e-99	NC
Zbtb4	4.4496e-103	-0.317675	0.131	0.365	6.81679e-99	NC
Nfe2l2	1.12173e-102	0.386772	0.785	0.782	1.71848e-98	NC
Gna12	1.904e-102	-0.30857	0.361	0.626	2.91692e-98	NC
Npc1	3.09887e-102	-0.339602	0.346	0.594	4.74747e-98	NC
S100a13	4.28484e-102	0.368124	0.542	0.328	6.56437e-98	NC
C3ar1	8.71911e-102	-0.0377638	0.458	0.687	1.33577e-97	NC
Psmb1	1.01801e-101	0.31764	0.818	0.722	1.55959e-97	NC
Matk	1.65632e-101	-0.313452	0.168	0.405	2.53748e-97	NC
Rell1	2.31007e-101	0.202534	0.205	0.043	3.53902e-97	NC
Ralgps2	3.7365e-101	-0.323727	0.125	0.353	5.72432e-97	NC
Spcs2	4.11743e-101	-0.254278	0.821	0.928	6.3079e-97	NC
Nadk	5.30472e-101	0.443694	0.462	0.274	8.12682e-97	NC
Accs	6.94428e-101	-0.298502	0.107	0.329	1.06386e-96	NC
Rcbtb2	1.23894e-100	-0.25781	0.436	0.7	1.89806e-96	NC
Nptn	1.48732e-100	-0.31314	0.678	0.835	2.27857e-96	NC
Twf2	1.9839e-100	-0.326368	0.578	0.75	3.03933e-96	NC
Cd302	3.71079e-100	-0.319995	0.5	0.722	5.68494e-96	NC
Cks2	4.6436e-100	0.490338	0.262	0.103	7.11399e-96	NC
Sap30	4.91557e-100	0.329818	0.377	0.158	7.53066e-96	NC
2310001H17Rik	5.02979e-100	0.159736	0.138	0.015	7.70564e-96	NC
Slc1a5	1.09592e-99	0.143797	0.129	0.013	1.67895e-95	NC
Hvcn1	1.53412e-99	-0.318384	0.262	0.522	2.35027e-95	NC
Aldoa	5.50439e-99	0.390439	0.833	0.79	8.43272e-95	NC
Sdc3	6.52764e-99	0.279749	0.291	0.097	1.00003e-94	NC
Csad	8.47805e-99	-0.339286	0.189	0.418	1.29884e-94	NC
Jam3	9.60897e-99	-0.21785	0.027	0.2	1.47209e-94	NC
Rpl36al	1.42511e-98	0.357111	0.712	0.557	2.18327e-94	NC
Siglece	2.28546e-98	-0.311233	0.153	0.383	3.50132e-94	NC
Mif	2.73063e-98	0.54182	0.648	0.554	4.18332e-94	UP
Prr5l	2.77411e-98	0.18808	0.171	0.029	4.24994e-94	NC
Atp5o.1	2.87847e-98	0.361489	0.7	0.538	4.40981e-94	NC
Zfpm1	2.97258e-98	-0.251624	0.055	0.253	4.55399e-94	NC
Slk	3.02828e-98	0.387973	0.505	0.282	4.63933e-94	NC
S100a1	3.16572e-98	0.273165	0.258	0.075	4.84989e-94	NC
Prag1	3.18367e-98	-0.264482	0.064	0.264	4.87738e-94	NC
Dab2	3.39412e-98	0.383824	0.26	0.088	5.19979e-94	NC
Pttg1ip	3.79421e-98	-0.327578	0.383	0.607	5.81272e-94	NC
Aars	4.83963e-98	-0.319922	0.193	0.419	7.41431e-94	NC
Tmem206	5.76819e-98	-0.29551	0.147	0.382	8.83686e-94	NC
Gla	6.27643e-98	0.237906	0.195	0.042	9.61549e-94	NC
Atp6v0e	8.84115e-98	0.290424	0.866	0.816	1.35446e-93	NC
A830008E24Rik	1.00982e-97	-0.320125	0.089	0.304	1.54705e-93	NC
Mrpl30	1.08045e-97	0.350791	0.589	0.369	1.65525e-93	NC
Eno1	1.30886e-97	0.351572	0.729	0.609	2.00517e-93	NC
Ctsb	2.57468e-97	0.131629	0.946	0.999	3.94441e-93	NC
Smdt1	3.5113e-97	0.360454	0.742	0.61	5.37931e-93	NC
Kdm6b	4.4082e-97	0.478454	0.461	0.268	6.75336e-93	NC
Man1a	4.87556e-97	-0.341142	0.366	0.599	7.46935e-93	NC
Large1	5.28522e-97	-0.290711	0.106	0.324	8.09696e-93	NC
Capn1	5.48572e-97	0.143828	0.143	0.018	8.40412e-93	NC
Dpy19l4	6.34726e-97	-0.3339	0.22	0.465	9.72401e-93	NC
Plpp1	7.32613e-97	-0.284548	0.105	0.325	1.12236e-92	NC
Hspe1	9.09134e-97	0.340583	0.838	0.776	1.39279e-92	NC
Vav1	9.30817e-97	-0.330862	0.47	0.667	1.42601e-92	NC
Pon3	1.11911e-96	-0.293101	0.204	0.451	1.71447e-92	NC
B4gat1	1.69572e-96	-0.29156	0.146	0.375	2.59785e-92	NC
Mvb12b	5.06661e-96	-0.302398	0.151	0.374	7.76205e-92	NC
Fbrsl1	6.40427e-96	-0.343792	0.279	0.498	9.81134e-92	NC
Usp24	7.3109e-96	-0.340629	0.241	0.472	1.12003e-91	NC
Pkig	7.97141e-96	-0.319299	0.448	0.676	1.22122e-91	NC
Gstm1	9.02352e-96	0.272593	0.192	0.047	1.3824e-91	NC
Myl12b	1.02839e-95	0.321003	0.843	0.81	1.57549e-91	NC
Erf	1.16477e-95	-0.306236	0.14	0.352	1.78443e-91	NC
Marveld1	1.28705e-95	0.199335	0.137	0.017	1.97177e-91	NC
Siva1	2.27534e-95	0.301688	0.375	0.163	3.48582e-91	NC
Ralgps1	2.91153e-95	-0.261005	0.059	0.25	4.46046e-91	NC
Ppt1	3.96233e-95	-0.301752	0.568	0.765	6.07029e-91	NC
Esd	5.99448e-95	0.354722	0.7	0.541	9.18355e-91	NC
Tomm7	7.02162e-95	0.339852	0.74	0.588	1.07571e-90	NC
Cd300c2	7.09199e-95	-0.182252	0.853	0.968	1.08649e-90	NC
Tmem204	9.13206e-95	-0.205617	0.024	0.188	1.39903e-90	NC
Rab39	9.14994e-95	-0.274408	0.079	0.282	1.40177e-90	NC
Polr1d	1.18174e-94	0.313692	0.74	0.616	1.81043e-90	NC
Rras	1.59621e-94	0.376265	0.381	0.187	2.44539e-90	NC
Zfp740	1.80662e-94	-0.31683	0.199	0.42	2.76774e-90	NC
Gm40841	2.02345e-94	-0.301779	0.081	0.288	3.09992e-90	NC
Hps3	3.46066e-94	-0.348653	0.335	0.56	5.30173e-90	NC
Myl12a	3.85816e-94	0.343768	0.741	0.606	5.9107e-90	NC
Pid1	7.50125e-94	0.368687	0.638	0.59	1.14919e-89	NC
Cdk2ap2	9.26973e-94	0.457954	0.626	0.508	1.42012e-89	NC
Dhrs3	9.96473e-94	-0.253137	0.465	0.718	1.5266e-89	NC
Ier5	1.27156e-93	-0.398607	0.852	0.955	1.94803e-89	NC
Plk2	1.29446e-93	0.334396	0.128	0.016	1.98311e-89	NC
Serp1	1.32674e-93	0.371756	0.709	0.588	2.03256e-89	NC
Ndufa6	1.88397e-93	0.348437	0.76	0.638	2.88624e-89	NC
Gimap6	2.08544e-93	-0.229767	0.069	0.268	3.19489e-89	NC
Cd151	2.14116e-93	-0.283528	0.176	0.412	3.28025e-89	NC
Evi2a	3.36397e-93	-0.311602	0.722	0.873	5.1536e-89	NC
Tcf7l2	5.24698e-93	-0.259536	0.122	0.349	8.03837e-89	NC
Rdx	6.11069e-93	-0.335642	0.47	0.648	9.36157e-89	NC
Klhl7	6.37858e-93	-0.280689	0.125	0.334	9.77199e-89	NC
2020-03-01	7.12244e-93	-0.346106	0.5	0.712	1.09116e-88	NC
Zfp691	8.47416e-93	-0.319141	0.111	0.324	1.29824e-88	NC
Slc44a2	9.90983e-93	-0.284928	0.292	0.545	1.51819e-88	NC
Ethe1	1.24566e-92	0.319975	0.333	0.146	1.90835e-88	NC
Gclc	2.29597e-92	-0.29615	0.14	0.358	3.51743e-88	NC
Noct	3.86966e-92	0.132442	0.107	0.008	5.92832e-88	NC
Bcl11a	3.94233e-92	0.173195	0.147	0.021	6.03964e-88	NC
Sppl3	4.45709e-92	-0.315134	0.232	0.451	6.82826e-88	NC
Clcn4	4.7577e-92	-0.322117	0.352	0.56	7.2888e-88	NC
Atp6ap2	5.28399e-92	-0.275868	0.68	0.844	8.09508e-88	NC
Pecr	5.33588e-92	-0.248891	0.102	0.316	8.17457e-88	NC
Chst2	1.87469e-91	0.275322	0.156	0.03	2.87202e-87	NC
Tnrc6b	4.4084e-91	-0.341282	0.426	0.634	6.75367e-87	NC
Yes1	4.68966e-91	-0.26394	0.062	0.25	7.18456e-87	NC
Zeb2os	8.83873e-91	-0.328457	0.415	0.626	1.35409e-86	NC
Fam53b	1.09134e-90	-0.314819	0.216	0.438	1.67193e-86	NC
Cfap74	1.35415e-90	-0.223838	0.042	0.218	2.07456e-86	NC
Acox3	1.38494e-90	-0.396556	0.288	0.515	2.12173e-86	NC
Gimap1	1.61395e-90	-0.241075	0.061	0.25	2.47257e-86	NC
Ncf1	1.70173e-90	-0.318553	0.658	0.831	2.60705e-86	NC
Gm37494	1.85923e-90	-0.314537	0.147	0.366	2.84835e-86	NC
Nckap5l	2.47283e-90	-0.25006	0.077	0.271	3.78837e-86	NC
2020-09-06	2.54785e-90	0.220216	0.213	0.054	3.90331e-86	NC
Slmap	2.71699e-90	-0.317579	0.239	0.455	4.16243e-86	NC
Washc4	3.02996e-90	-0.330647	0.341	0.558	4.6419e-86	NC
Ccdc93	3.79688e-90	-0.302934	0.197	0.425	5.81682e-86	NC
Tnfrsf21	3.90861e-90	-0.318276	0.32	0.548	5.98799e-86	NC
Olfml2b	4.2004e-90	-0.216881	0.032	0.195	6.43501e-86	NC
Ncoa4	5.1891e-90	-0.320927	0.256	0.47	7.94969e-86	NC
Pycard	5.42758e-90	-0.257082	0.777	0.913	8.31505e-86	NC
Reep3	7.34558e-90	-0.326915	0.494	0.68	1.12534e-85	NC
Oaf	8.17459e-90	-0.240232	0.052	0.23	1.25235e-85	NC
Dync1i2	8.9424e-90	-0.330538	0.497	0.68	1.36998e-85	NC
Gabarap	1.102e-89	0.250942	0.939	0.939	1.68827e-85	NC
Unc50	1.30599e-89	-0.298715	0.331	0.547	2.00078e-85	NC
BC035044	1.5832e-89	-0.316537	0.25	0.477	2.42546e-85	NC
Sypl	2.29705e-89	-0.31252	0.41	0.623	3.51908e-85	NC
Arl4c	2.32365e-89	-0.344	0.689	0.858	3.55983e-85	NC
Pten	2.51662e-89	-0.303258	0.532	0.705	3.85546e-85	NC
Slc12a9	2.9471e-89	-0.325104	0.283	0.514	4.51496e-85	NC
Creg1	7.52216e-89	-0.176712	0.782	0.929	1.1524e-84	NC
Degs1	8.96364e-89	0.376447	0.537	0.342	1.37323e-84	NC
Abcd3	1.21258e-88	-0.273192	0.108	0.313	1.85768e-84	NC
Plin3	1.27177e-88	0.19185	0.249	0.075	1.94835e-84	NC
Shisa5	1.5328e-88	0.346225	0.72	0.597	2.34825e-84	NC
Gm31243	3.05773e-88	-0.191109	0.012	0.149	4.68444e-84	NC
Zkscan3	4.64361e-88	-0.331388	0.282	0.497	7.11401e-84	NC
Ddrgk1	5.00601e-88	-0.300229	0.57	0.727	7.66921e-84	NC
Il10ra	5.55713e-88	-0.308826	0.582	0.766	8.51352e-84	NC
Ergic3	6.08298e-88	-0.283907	0.609	0.767	9.31912e-84	NC
Epn2	9.26037e-88	-0.213079	0.028	0.189	1.41869e-83	NC
B230219D22Rik	1.27104e-87	-0.329721	0.377	0.578	1.94724e-83	NC
Trim2	1.66266e-87	-0.252015	0.059	0.242	2.54719e-83	NC
Tma7	2.37699e-87	0.305623	0.784	0.692	3.64155e-83	NC
Maml2	3.05555e-87	-0.272535	0.108	0.315	4.68111e-83	NC
Qpct	3.27918e-87	0.144932	0.125	0.015	5.02371e-83	NC
Trim8	3.43764e-87	-0.332506	0.37	0.568	5.26647e-83	NC
Cd47	5.62386e-87	0.295194	0.781	0.807	8.61575e-83	NC
Srsf9	5.92281e-87	-0.273499	0.682	0.838	9.07375e-83	NC
Yipf4	7.3845e-87	-0.293809	0.412	0.607	1.1313e-82	NC
Sh2b3	2.03176e-86	-0.305576	0.249	0.457	3.11266e-82	NC
Hpcal1	2.81942e-86	0.278885	0.401	0.19	4.31936e-82	NC
Plekho1	3.3881e-86	-0.271109	0.738	0.883	5.19057e-82	NC
Cd82	4.02268e-86	-0.303882	0.325	0.547	6.16275e-82	NC
Tm2d3	4.28565e-86	-0.291216	0.283	0.501	6.56561e-82	NC
9930111J21Rik2	4.33758e-86	-0.296748	0.518	0.73	6.64517e-82	NC
Plgrkt	4.46145e-86	-0.270123	0.479	0.711	6.83494e-82	NC
Ppm1l	4.84431e-86	-0.220619	0.034	0.198	7.42149e-82	NC
Gmpr2	6.13837e-86	-0.309395	0.277	0.478	9.40399e-82	NC
Pla2g4a	6.28659e-86	-0.298672	0.181	0.392	9.63105e-82	NC
Smox	1.16546e-85	-0.293222	0.223	0.453	1.78548e-81	NC
Trpm2	1.26843e-85	-0.262461	0.086	0.284	1.94324e-81	NC
Rtn4	1.68258e-85	-0.233781	0.806	0.924	2.57771e-81	NC
Cers6	2.89461e-85	0.262874	0.276	0.097	4.43454e-81	NC
Cycs	3.80846e-85	0.35169	0.561	0.395	5.83457e-81	NC
Stard4	4.27995e-85	0.11821	0.102	0.008	6.55688e-81	NC
Mbnl2	6.04144e-85	-0.314737	0.474	0.658	9.25549e-81	NC
Cdh23	7.43117e-85	-0.182818	0.012	0.146	1.13845e-80	NC
G3bp2	8.43626e-85	-0.309334	0.479	0.66	1.29243e-80	NC
Tuba4a	9.1095e-85	0.207701	0.134	0.021	1.39558e-80	NC
Elob	9.13882e-85	0.31508	0.81	0.714	1.40007e-80	NC
P3h2	1.24013e-84	-0.257966	0.132	0.347	1.89988e-80	NC
Fam49a	1.52147e-84	0.319596	0.285	0.106	2.33089e-80	NC
Pde4b	1.59918e-84	0.323591	0.332	0.145	2.44994e-80	NC
Ctsc	1.61501e-84	0.270021	0.831	0.91	2.4742e-80	NC
Tmem64	2.41376e-84	-0.292025	0.138	0.341	3.69788e-80	NC
Ebf3	2.83965e-84	-0.21245	0.037	0.2	4.35034e-80	NC
Zbtb20	3.60834e-84	-0.401715	0.375	0.586	5.52798e-80	NC
Bcl6	5.22059e-84	0.256659	0.23	0.07	7.99794e-80	NC
Rpn2	5.22575e-84	-0.280151	0.648	0.803	8.00586e-80	NC
Arvcf	6.51566e-84	-0.211695	0.036	0.197	9.98199e-80	NC
Birc3	6.86055e-84	0.311528	0.389	0.184	1.05104e-79	NC
Csrp1	1.16066e-83	0.11957	0.108	0.01	1.77812e-79	NC
Cadm1	1.39926e-83	-0.121636	0.333	0.559	2.14367e-79	NC
Cox7a2	1.40245e-83	0.312771	0.78	0.655	2.14855e-79	NC
Hnrnpa1	1.72887e-83	0.338834	0.706	0.585	2.64862e-79	NC
Ktn1	2.43172e-83	-0.330684	0.327	0.545	3.72539e-79	NC
Tmem176a	2.51254e-83	0.275706	0.693	0.752	3.84922e-79	NC
Hsd17b11	2.51518e-83	-0.305507	0.434	0.615	3.85325e-79	NC
Psap	2.82573e-83	0.293148	0.972	0.996	4.32901e-79	NC
Tlr7	3.23984e-83	-0.29051	0.269	0.507	4.96343e-79	NC
Scarb2	7.29673e-83	-0.269805	0.542	0.742	1.11786e-78	NC
Etv1	8.0882e-83	-0.236254	0.06	0.238	1.23911e-78	NC
Cox6a1	8.59857e-83	0.310321	0.735	0.617	1.3173e-78	NC
Nme1	8.98861e-83	0.339028	0.561	0.407	1.37706e-78	NC
Il10rb	1.0785e-82	-0.283249	0.578	0.77	1.65227e-78	NC
Clptm1	1.14764e-82	-0.303473	0.333	0.529	1.75819e-78	NC
Chsy1	1.60732e-82	-0.277015	0.127	0.319	2.46242e-78	NC
Abhd17c	1.92189e-82	-0.277346	0.195	0.417	2.94434e-78	NC
Ubl5	2.82007e-82	0.299744	0.802	0.715	4.32035e-78	NC
Dnajb9	3.09956e-82	-0.299253	0.267	0.489	4.74853e-78	NC
BC017643	3.17323e-82	-0.305684	0.35	0.543	4.86139e-78	NC
Rbm25	4.16881e-82	-0.287077	0.723	0.851	6.38661e-78	NC
Acap2	5.3931e-82	-0.327483	0.416	0.614	8.26223e-78	NC
Ppp1r14b	6.13041e-82	-0.242195	0.605	0.797	9.39179e-78	NC
Galnt12	6.17045e-82	-0.281694	0.161	0.362	9.45313e-78	NC
Chst8	1.48775e-81	-0.189836	0.015	0.15	2.27924e-77	NC
Il1a	1.69747e-81	0.223505	0.349	0.527	2.60053e-77	NC
Eif4a2	1.69754e-81	-0.28265	0.642	0.784	2.60063e-77	NC
Fam20c	2.99534e-81	0.239913	0.149	0.029	4.58886e-77	NC
Idi1	3.1422e-81	0.244545	0.167	0.038	4.81385e-77	NC
Zfp644	3.20741e-81	-0.317756	0.352	0.555	4.91376e-77	NC
Wdr44	4.50811e-81	-0.315364	0.242	0.45	6.90642e-77	NC
Spg20	9.28464e-81	-0.269985	0.141	0.349	1.42241e-76	NC
Tpcn1	1.90439e-80	-0.282679	0.187	0.398	2.91753e-76	NC
Krcc1	2.15131e-80	-0.303701	0.497	0.676	3.29581e-76	NC
Slc35b2	2.39779e-80	-0.29811	0.295	0.499	3.67342e-76	NC
Pex2	2.59421e-80	-0.288246	0.287	0.485	3.97433e-76	NC
Liph	2.80587e-80	-0.250468	0.088	0.28	4.29859e-76	NC
Mindy2	2.92857e-80	-0.310843	0.398	0.592	4.48657e-76	NC
Smc4	3.18833e-80	0.314064	0.217	0.065	4.88452e-76	NC
Eno3	5.36001e-80	0.331478	0.123	0.129	8.21154e-76	NC
Bend6	5.78627e-80	-0.217205	0.041	0.2	8.86456e-76	NC
Arhgap27	6.31066e-80	-0.275018	0.163	0.374	9.66793e-76	NC
Oxct1	8.73716e-80	-0.24471	0.546	0.762	1.33853e-75	NC
Cysltr1	1.10304e-79	-0.318684	0.367	0.573	1.68985e-75	NC
Tk2	1.22787e-79	-0.260517	0.114	0.307	1.8811e-75	NC
Kdm2b	1.56213e-79	-0.296704	0.278	0.476	2.39318e-75	NC
Ppp3ca	1.75579e-79	-0.306876	0.543	0.703	2.68987e-75	NC
Fam49b	1.82026e-79	-0.19659	0.871	0.963	2.78864e-75	NC
Tmem238	2.01064e-79	0.147928	0.137	0.023	3.0803e-75	NC
Rasgef1b	2.0711e-79	0.41388	0.373	0.223	3.17293e-75	NC
Txndc15	2.30642e-79	-0.280157	0.418	0.617	3.53343e-75	NC
Prr13	2.5472e-79	0.417095	0.617	0.486	3.90231e-75	NC
Ociad1	2.68743e-79	-0.296951	0.446	0.615	4.11714e-75	NC
Tlr4	2.81089e-79	-0.257251	0.121	0.32	4.30629e-75	NC
Snx13	3.05774e-79	-0.282089	0.154	0.353	4.68446e-75	NC
Tia1	3.1136e-79	-0.333102	0.268	0.461	4.77003e-75	NC
Xlr	3.23984e-79	-0.245243	0.239	0.472	4.96343e-75	NC
Arhgap17	3.53455e-79	-0.295248	0.531	0.727	5.41493e-75	NC
Slc36a1	3.62249e-79	-0.272324	0.155	0.357	5.54966e-75	NC
Ccdc47	3.86957e-79	-0.305906	0.42	0.613	5.92818e-75	NC
Snrpg	4.59644e-79	0.308218	0.603	0.405	7.04174e-75	NC
Tspan17	6.37802e-79	0.129479	0.116	0.014	9.77113e-75	NC
Vps18	9.30032e-79	-0.297539	0.184	0.378	1.42481e-74	NC
Crlf3	9.51513e-79	-0.30731	0.529	0.711	1.45772e-74	NC
Zfp950	1.04812e-78	-0.308893	0.182	0.385	1.60571e-74	NC
Armc3	1.42626e-78	-0.204329	0.035	0.187	2.18503e-74	NC
Rbm5	2.14008e-78	-0.306511	0.527	0.706	3.2786e-74	NC
Pan3	3.83315e-78	-0.302382	0.378	0.571	5.87239e-74	NC
Rhoq	3.90927e-78	-0.250596	0.244	0.474	5.989e-74	NC
Helz	4.013e-78	-0.305327	0.203	0.404	6.14791e-74	NC
Tmem205	4.03806e-78	0.153315	0.157	0.032	6.1863e-74	NC
Tm6sf1	4.11716e-78	-0.297883	0.623	0.803	6.30748e-74	NC
Gm17056	6.66028e-78	0.290157	0.204	0.057	1.02035e-73	NC
Hook3	8.32976e-78	-0.338237	0.49	0.659	1.27612e-73	NC
Fam208a	1.08942e-77	-0.314592	0.292	0.493	1.66899e-73	NC
Aes	1.54886e-77	0.333112	0.736	0.619	2.37286e-73	NC
Rgl1	2.23593e-77	-0.255712	0.12	0.313	3.42545e-73	NC
Zfp36l2	2.70079e-77	-0.261772	0.749	0.904	4.13761e-73	NC
Emc7	2.73602e-77	-0.283973	0.511	0.691	4.19158e-73	NC
Gm1673	3.56436e-77	0.161106	0.119	0.017	5.46061e-73	NC
Fam3a	4.23319e-77	-0.264477	0.176	0.377	6.48524e-73	NC
Cnpy2	4.72326e-77	-0.260609	0.484	0.688	7.23603e-73	NC
Ttc14	5.50043e-77	-0.320165	0.472	0.658	8.42665e-73	NC
Apc	1.2266e-76	-0.322037	0.287	0.485	1.87916e-72	NC
Trp53cor1	1.46127e-76	-0.186597	0.023	0.159	2.23866e-72	NC
Bmpr2	1.85038e-76	-0.288604	0.298	0.503	2.83479e-72	NC
Rogdi	2.03184e-76	-0.280738	0.304	0.512	3.11278e-72	NC
Tmem170b	2.15749e-76	-0.282937	0.195	0.392	3.30527e-72	NC
Rdh14	2.77215e-76	-0.258231	0.167	0.366	4.24693e-72	NC
Nes	2.92578e-76	0.240589	0.107	0.015	4.4823e-72	NC
Tecr	3.58822e-76	-0.287644	0.566	0.711	5.49716e-72	NC
Tiam1	4.21645e-76	0.217823	0.217	0.065	6.45961e-72	NC
Atp8a1	4.65928e-76	-0.303052	0.332	0.535	7.13801e-72	NC
Akap8l	7.12181e-76	-0.289879	0.308	0.512	1.09106e-71	NC
Atp6ap1	8.06272e-76	-0.267919	0.614	0.773	1.23521e-71	NC
Nuak2	1.01552e-75	0.266233	0.325	0.138	1.55578e-71	NC
Tm9sf3	1.21564e-75	-0.269412	0.683	0.82	1.86237e-71	NC
Milr1	1.41586e-75	0.261925	0.334	0.144	2.1691e-71	NC
Bcl2l1	1.75568e-75	-0.24889	0.151	0.358	2.6897e-71	NC
Rsbn1	2.02787e-75	-0.285129	0.216	0.404	3.1067e-71	NC
Tmed5	2.16886e-75	-0.264168	0.681	0.833	3.3227e-71	NC
Cul1	2.25582e-75	-0.294203	0.478	0.647	3.45591e-71	NC
Zeb1	2.3907e-75	-0.269811	0.128	0.308	3.66255e-71	NC
Dpysl2	2.50884e-75	-0.300032	0.447	0.636	3.84355e-71	NC
Gm5086	2.88322e-75	-0.254248	0.133	0.333	4.4171e-71	NC
Ppp1r18	3.08378e-75	-0.284338	0.521	0.664	4.72435e-71	NC
Setd5	4.19705e-75	-0.297324	0.362	0.553	6.42988e-71	NC
Rnf215	4.38463e-75	-0.260132	0.171	0.364	6.71725e-71	NC
Nf1	4.70574e-75	-0.269075	0.176	0.366	7.2092e-71	NC
Nop10	6.00789e-75	0.321327	0.569	0.386	9.20409e-71	NC
Grk3	6.04204e-75	0.390238	0.395	0.238	9.2564e-71	NC
Slc2a8	9.70239e-75	-0.24004	0.107	0.289	1.48641e-70	NC
Cebpg	1.64803e-74	-0.288696	0.533	0.714	2.52479e-70	NC
Plscr1	1.73177e-74	0.168058	0.118	0.017	2.65308e-70	NC
Tram1	1.7399e-74	-0.278329	0.579	0.73	2.66552e-70	NC
Uqcrfs1	1.97459e-74	0.298501	0.634	0.468	3.02507e-70	NC
Sipa1l1	2.05445e-74	-0.269699	0.165	0.368	3.14741e-70	NC
H3f3b	2.26303e-74	0.254651	0.963	0.992	3.46697e-70	NC
mt-Co1	2.54417e-74	0.250514	0.986	0.995	3.89766e-70	NC
Ifitm10	2.85954e-74	-0.213612	0.065	0.237	4.38082e-70	NC
Nmt1	4.00195e-74	-0.278271	0.525	0.688	6.13099e-70	NC
Bmyc	5.50126e-74	-0.287243	0.544	0.725	8.42794e-70	NC
Gmfg	5.97919e-74	0.334605	0.674	0.6	9.16013e-70	NC
Tubb6	7.04641e-74	0.162977	0.139	0.026	1.07951e-69	NC
Celf1	9.83284e-74	-0.292423	0.411	0.602	1.50639e-69	NC
Rnf180	1.0966e-73	-0.221437	0.114	0.306	1.67999e-69	NC
Tmem176b	1.19818e-73	0.0886943	0.766	0.898	1.83562e-69	NC
Edem1	1.22636e-73	-0.28949	0.487	0.659	1.87878e-69	NC
Nars	1.24995e-73	-0.273283	0.538	0.71	1.91492e-69	NC
Osbpl11	1.33871e-73	-0.286576	0.23	0.439	2.0509e-69	NC
Plxdc1	1.70818e-73	-0.261846	0.162	0.354	2.61693e-69	NC
Grasp	1.74644e-73	0.305145	0.14	0.029	2.67554e-69	NC
Scamp1	1.82311e-73	-0.240461	0.105	0.284	2.793e-69	NC
Rapsn	2.39458e-73	-0.227372	0.145	0.348	3.6685e-69	NC
Srsf5	3.25366e-73	-0.279742	0.671	0.812	4.98461e-69	NC
Nop53	3.98903e-73	0.32534	0.592	0.403	6.1112e-69	NC
Ube2s	5.89129e-73	0.413293	0.576	0.415	9.02545e-69	NC
Tmpo	6.2481e-73	0.376398	0.446	0.288	9.57209e-69	NC
Bola2	7.55951e-73	0.314818	0.515	0.322	1.15812e-68	NC
Usp18	8.67125e-73	0.195295	0.113	0.017	1.32844e-68	NC
Zfp715	9.97373e-73	-0.232893	0.09	0.265	1.52797e-68	NC
Nup210	1.00496e-72	0.122945	0.113	0.016	1.5396e-68	NC
Ppp2r5a	1.02456e-72	0.3568	0.479	0.307	1.56962e-68	NC
Tmem245	1.18106e-72	-0.286171	0.171	0.357	1.80938e-68	NC
Gsk3b	2.02489e-72	-0.294749	0.471	0.64	3.10213e-68	NC
Ublcp1	2.10586e-72	-0.24763	0.126	0.307	3.22618e-68	NC
Got1	3.24965e-72	0.319701	0.369	0.205	4.97847e-68	NC
Zmynd11	4.95538e-72	-0.287592	0.302	0.499	7.59164e-68	NC
Sec14l1	5.11255e-72	-0.278347	0.343	0.556	7.83243e-68	NC
Gm10138	5.14123e-72	-0.300553	0.128	0.31	7.87636e-68	NC
Tspan31	5.71986e-72	-0.27477	0.386	0.541	8.76283e-68	NC
Snrpd2	9.54226e-72	0.300896	0.642	0.473	1.46187e-67	NC
Capns1	9.91295e-72	0.302863	0.734	0.598	1.51866e-67	NC
Gyg	1.27697e-71	0.282463	0.33	0.154	1.95631e-67	NC
Gtpbp2	1.36057e-71	-0.280092	0.325	0.523	2.08439e-67	NC
Pip4k2a	1.90334e-71	-0.275125	0.605	0.746	2.91592e-67	NC
Spsb1	2.24191e-71	-0.239496	0.094	0.266	3.43461e-67	NC
Rgl2	2.8059e-71	-0.264579	0.254	0.46	4.29863e-67	NC
Fyb	2.89815e-71	0.039068	0.793	0.936	4.43997e-67	NC
Trib1	2.91182e-71	0.339546	0.39	0.24	4.4609e-67	NC
Snx3	3.66775e-71	0.27989	0.763	0.651	5.61899e-67	NC
Scaf11	4.27595e-71	-0.287756	0.573	0.733	6.55076e-67	NC
Mbd2	4.29063e-71	0.289365	0.517	0.312	6.57325e-67	NC
Usp22	4.62392e-71	-0.258471	0.154	0.329	7.08384e-67	NC
Scpep1	4.79435e-71	0.289456	0.506	0.301	7.34494e-67	NC
Dnase2a	5.42065e-71	-0.251204	0.439	0.654	8.30444e-67	NC
Ndufa1	5.5338e-71	0.320588	0.613	0.427	8.47779e-67	NC
Zfp706	5.9752e-71	-0.239088	0.717	0.834	9.154e-67	NC
Kat6a	6.26957e-71	-0.304602	0.341	0.516	9.60498e-67	NC
Fyn	6.33096e-71	0.194307	0.212	0.066	9.69903e-67	NC
Tppp	8.97209e-71	-0.185452	0.038	0.183	1.37452e-66	NC
Ago1	1.17609e-70	-0.249106	0.146	0.337	1.80177e-66	NC
Clta	1.39642e-70	-0.149517	0.935	0.986	2.13931e-66	NC
Rnf7	1.49472e-70	-0.248158	0.561	0.718	2.2899e-66	NC
Haus8	1.50066e-70	0.204511	0.228	0.075	2.29901e-66	NC
Hspb3	1.78973e-70	-0.237784	0.068	0.229	2.74186e-66	NC
Cxcl10	2.13967e-70	1.00357	0.205	0.063	3.27797e-66	UP
Zfp532	3.2375e-70	-0.204525	0.048	0.199	4.95986e-66	NC
2020-03-02	4.19569e-70	-0.263226	0.54	0.698	6.4278e-66	NC
Gm9493	4.54873e-70	0.208585	0.255	0.093	6.96865e-66	NC
Adap1	9.16617e-70	0.180479	0.233	0.079	1.40426e-65	NC
Prelid1	1.0992e-69	0.292036	0.595	0.431	1.68397e-65	NC
Tmx2	1.22378e-69	-0.235704	0.132	0.317	1.87483e-65	NC
Fam96a	1.50482e-69	0.303823	0.564	0.401	2.30539e-65	NC
Nfic	1.69181e-69	-0.29719	0.449	0.632	2.59185e-65	NC
Zbtb38	2.75983e-69	-0.287479	0.188	0.377	4.22805e-65	NC
Acvr1	2.8312e-69	-0.218944	0.081	0.239	4.33741e-65	NC
Nedd8	2.83854e-69	0.278321	0.793	0.71	4.34864e-65	NC
Sorl1	2.99078e-69	0.281084	0.354	0.181	4.58188e-65	NC
Rbm26	3.3171e-69	-0.290025	0.378	0.551	5.0818e-65	NC
Uqcrq	4.18991e-69	0.294	0.727	0.614	6.41894e-65	NC
Impa2	5.2272e-69	0.121026	0.117	0.019	8.00808e-65	NC
Mpc1	6.19155e-69	-0.242988	0.72	0.841	9.48545e-65	NC
E2f3	6.90409e-69	-0.222587	0.087	0.256	1.05771e-64	NC
Chn2	8.68016e-69	-0.255084	0.2	0.389	1.3298e-64	NC
Clip1	1.05255e-68	-0.286306	0.407	0.599	1.6125e-64	NC
Tsc22d2	1.10555e-68	-0.422454	0.375	0.557	1.69371e-64	NC
Pdia6	1.27988e-68	-0.149991	0.778	0.916	1.96078e-64	NC
Bicd2	1.48855e-68	-0.274734	0.242	0.431	2.28045e-64	NC
Adrb1	1.72407e-68	-0.250631	0.06	0.217	2.64127e-64	NC
Nek7	1.85041e-68	-0.269386	0.47	0.649	2.83484e-64	NC
Stat1	2.03819e-68	0.370452	0.424	0.265	3.12251e-64	NC
Maff	2.15358e-68	0.169622	0.156	0.037	3.29929e-64	NC
Eva1a	2.36733e-68	-0.211665	0.061	0.218	3.62676e-64	NC
Sema4c	2.4065e-68	-0.229987	0.097	0.271	3.68675e-64	NC
Pdzd8	2.40798e-68	-0.278309	0.211	0.401	3.68903e-64	NC
Fermt3	2.45736e-68	-0.252981	0.644	0.783	3.76468e-64	NC
Rbm39	3.2446e-68	-0.178509	0.878	0.972	4.97073e-64	NC
Mpp1	3.79125e-68	0.286745	0.323	0.163	5.8082e-64	NC
Cxcl2	4.41025e-68	0.991932	0.119	0.022	6.7565e-64	UP
Slc25a11	4.5486e-68	-0.257901	0.53	0.68	6.96846e-64	NC
Gm13889	4.82144e-68	-0.511286	0.06	0.218	7.38644e-64	DN
Gprasp1	5.42035e-68	-0.227184	0.096	0.271	8.30398e-64	NC
Ythdf2	5.44366e-68	-0.275725	0.282	0.464	8.33969e-64	NC
Ccl12	6.63759e-68	0.478288	0.244	0.404	1.01688e-63	NC
Tceal1	7.04046e-68	-0.188162	0.046	0.192	1.0786e-63	NC
Pgls	7.69242e-68	0.295221	0.725	0.599	1.17848e-63	NC
Arsk	9.11528e-68	-0.238056	0.122	0.303	1.39646e-63	NC
Rp2	9.42218e-68	-0.277067	0.415	0.584	1.44348e-63	NC
Nabp1	9.73109e-68	0.259021	0.214	0.076	1.4908e-63	NC
Myl2	1.12207e-67	-0.159262	0.022	0.146	1.71901e-63	NC
Etnk1	1.12333e-67	-0.274816	0.352	0.552	1.72094e-63	NC
Nagpa	1.29568e-67	-0.26693	0.338	0.523	1.98499e-63	NC
2610528A11Rik	1.57563e-67	-0.219847	0.076	0.24	2.41387e-63	NC
Fam69a	1.68181e-67	0.224246	0.344	0.159	2.57653e-63	NC
Slc35c2	1.69828e-67	-0.274526	0.352	0.523	2.60177e-63	NC
Arl8b	2.58242e-67	-0.271936	0.398	0.562	3.95627e-63	NC
Atp5b	2.86483e-67	0.262472	0.836	0.787	4.38892e-63	NC
Ubn2	3.36665e-67	-0.290468	0.429	0.598	5.1577e-63	NC
Tnfrsf13b	3.53998e-67	-0.292378	0.334	0.518	5.42325e-63	NC
Afap1l1	5.2183e-67	-0.162024	0.024	0.15	7.99443e-63	NC
Aplp2	6.34202e-67	0.344492	0.602	0.441	9.71597e-63	NC
Ncbp3	6.49073e-67	-0.270169	0.215	0.397	9.9438e-63	NC
Fundc2	7.06819e-67	0.259228	0.393	0.207	1.08285e-62	NC
Psme2	1.04597e-66	0.307421	0.695	0.576	1.60242e-62	NC
Slco4a1	1.1159e-66	-0.152319	0.014	0.125	1.70956e-62	NC
Lap3	1.32308e-66	-0.225656	0.432	0.646	2.02696e-62	NC
AC160562.1	1.45533e-66	-0.162012	0.019	0.14	2.22957e-62	NC
Cds1	1.67617e-66	-0.229243	0.121	0.291	2.5679e-62	NC
Tab2	1.88439e-66	-0.276324	0.442	0.613	2.88689e-62	NC
Fer	2.05568e-66	-0.225493	0.083	0.249	3.1493e-62	NC
Cotl1	2.36704e-66	0.226658	0.867	0.889	3.62631e-62	NC
Srebf2	2.89675e-66	0.224251	0.283	0.118	4.43783e-62	NC
Nab1	3.57463e-66	0.243655	0.336	0.158	5.47634e-62	NC
Pacsin2	4.13263e-66	-0.272199	0.409	0.587	6.33119e-62	NC
H2-T23	5.12515e-66	0.294361	0.774	0.738	7.85173e-62	NC
Ykt6	5.2404e-66	-0.241205	0.17	0.344	8.0283e-62	NC
Lsm4	5.62511e-66	0.289442	0.54	0.351	8.61767e-62	NC
Slc39a7	8.22336e-66	-0.264418	0.34	0.519	1.25982e-61	NC
Rubcnl	8.37788e-66	-0.228063	0.107	0.274	1.28349e-61	NC
Gdi2	1.31828e-65	-0.171568	0.869	0.958	2.01961e-61	NC
Hmg20a	1.48638e-65	-0.239282	0.142	0.32	2.27714e-61	NC
Rtp4	2.00027e-65	0.286505	0.195	0.069	3.06442e-61	NC
Cfap43	2.65746e-65	0.110085	0.108	0.017	4.07122e-61	NC
Gatm	3.18609e-65	0.0672622	0.389	0.542	4.88109e-61	NC
Ptprm	3.57082e-65	-0.177343	0.043	0.184	5.4705e-61	NC
Rreb1	4.45555e-65	-0.277335	0.261	0.454	6.8259e-61	NC
Pfdn5	5.42779e-65	0.219563	0.937	0.93	8.31537e-61	NC
Paqr7	5.90171e-65	-0.240351	0.145	0.317	9.04143e-61	NC
Zfp157	6.42779e-65	-0.231817	0.112	0.285	9.84738e-61	NC
Derl1	6.91768e-65	-0.250586	0.543	0.704	1.05979e-60	NC
Mbp	1.33162e-64	0.291578	0.284	0.134	2.04004e-60	NC
Svil	1.34435e-64	0.257312	0.275	0.121	2.05954e-60	NC
Cd86	1.49773e-64	-0.196999	0.685	0.849	2.29452e-60	NC
Bptf	1.52947e-64	-0.275854	0.501	0.655	2.34315e-60	NC
Tspan13	2.08763e-64	-0.271942	0.409	0.602	3.19824e-60	NC
Phip	3.16252e-64	-0.298572	0.437	0.604	4.84498e-60	NC
Cnpy3	3.23749e-64	-0.253598	0.49	0.654	4.95984e-60	NC
Acvr2b	3.4091e-64	-0.186931	0.052	0.195	5.22274e-60	NC
Ly6e	4.77274e-64	0.153393	0.89	0.979	7.31184e-60	NC
Naglu	5.15006e-64	-0.240312	0.263	0.47	7.88989e-60	NC
Nfatc2	5.19366e-64	-0.231965	0.13	0.302	7.95668e-60	NC
Spry1	5.72744e-64	-0.233759	0.038	0.171	8.77444e-60	NC
Ldb1	5.99824e-64	-0.249803	0.218	0.405	9.18931e-60	NC
Atp5g3	6.47913e-64	0.299035	0.581	0.407	9.92603e-60	NC
Tmed4	6.88605e-64	-0.24146	0.213	0.392	1.05494e-59	NC
Klhl9	7.20366e-64	-0.251996	0.249	0.443	1.1036e-59	NC
Atp6v1f	7.24243e-64	0.266636	0.849	0.792	1.10954e-59	NC
Rhoa	7.67191e-64	0.193181	0.934	0.963	1.17534e-59	NC
Gmip	8.77074e-64	-0.264184	0.312	0.496	1.34368e-59	NC
Sqor	9.20437e-64	-0.255795	0.28	0.482	1.41011e-59	NC
Zcchc7	9.79903e-64	-0.274085	0.388	0.562	1.50121e-59	NC
Cyp4f13	1.38844e-63	-0.238414	0.147	0.324	2.12709e-59	NC
Tcirg1	1.45602e-63	-0.272824	0.456	0.64	2.23062e-59	NC
Gab1	1.47673e-63	-0.184478	0.052	0.197	2.26235e-59	NC
Mon2	1.50647e-63	-0.25446	0.225	0.413	2.30791e-59	NC
Icam1	1.56246e-63	-0.318695	0.404	0.616	2.39369e-59	NC
Rapgef6	1.68633e-63	-0.28257	0.341	0.525	2.58346e-59	NC
Slc35a5	2.22409e-63	-0.24337	0.155	0.33	3.4073e-59	NC
Mta3	2.51468e-63	0.198723	0.257	0.101	3.85248e-59	NC
Lrrfip1	2.61244e-63	0.340958	0.629	0.486	4.00226e-59	NC
Slc25a45	3.72132e-63	-0.23955	0.203	0.387	5.70106e-59	NC
Eif4ebp1	3.96868e-63	0.284881	0.481	0.292	6.08002e-59	NC
Cd2ap	4.70888e-63	-0.276016	0.517	0.673	7.214e-59	NC
Cnot2	5.34494e-63	-0.259165	0.283	0.455	8.18845e-59	NC
Trim26	5.46668e-63	-0.262087	0.273	0.455	8.37496e-59	NC
Gnas	5.54875e-63	0.264378	0.934	0.946	8.50069e-59	NC
Fam107b	7.76179e-63	0.286819	0.293	0.147	1.18911e-58	NC
Lifr	8.76769e-63	-0.25391	0.152	0.33	1.34321e-58	NC
Ufl1	1.03065e-62	-0.260227	0.239	0.417	1.57896e-58	NC
Gprasp2	1.05014e-62	-0.167294	0.026	0.148	1.60882e-58	NC
Lamp1	1.22864e-62	0.00776355	0.924	0.991	1.88228e-58	NC
Rab3gap1	1.29159e-62	-0.261112	0.209	0.381	1.97872e-58	NC
Skil	1.34439e-62	-0.192201	0.651	0.826	2.05961e-58	NC
Arl6ip1	1.50164e-62	-0.128104	0.859	0.944	2.30051e-58	NC
Eif4a1	1.73536e-62	0.236068	0.87	0.906	2.65857e-58	NC
Clcn3	2.77291e-62	-0.267821	0.253	0.421	4.24809e-58	NC
Tgfbrap1	3.07627e-62	-0.227518	0.116	0.275	4.71285e-58	NC
Dtx3	4.50424e-62	-0.209536	0.078	0.232	6.90049e-58	NC
Hs6st1	4.6843e-62	-0.246828	0.166	0.34	7.17635e-58	NC
Sp140	4.98912e-62	0.296071	0.346	0.183	7.64333e-58	NC
Glrp1	5.01623e-62	-0.169764	0.035	0.165	7.68487e-58	NC
Ddx3x	5.58135e-62	-0.354076	0.542	0.679	8.55063e-58	NC
Hist1h2bc	5.58753e-62	-0.361285	0.257	0.462	8.56009e-58	NC
Adprh	6.35886e-62	-0.254139	0.409	0.576	9.74177e-58	NC
Dnajc3	6.92924e-62	-0.260143	0.543	0.706	1.06156e-57	NC
Casd1	7.0728e-62	-0.242808	0.167	0.341	1.08355e-57	NC
Smpd5	7.09883e-62	-0.165163	0.028	0.151	1.08754e-57	NC
Alg5	7.2178e-62	-0.25696	0.35	0.526	1.10577e-57	NC
Trpc4ap	7.67535e-62	-0.250494	0.409	0.571	1.17586e-57	NC
Mapkapk3	7.73437e-62	0.166872	0.224	0.08	1.18491e-57	NC
Mgat5	8.142e-62	-0.248203	0.195	0.38	1.24735e-57	NC
Slc38a10	1.03284e-61	-0.252702	0.289	0.466	1.58231e-57	NC
Ms4a6b	1.15052e-61	0.173282	0.503	0.616	1.76259e-57	NC
Tmed10	1.17939e-61	-0.205838	0.837	0.924	1.80682e-57	NC
Tal1	1.69552e-61	-0.18457	0.041	0.174	2.59754e-57	NC
Zfp871	1.91458e-61	-0.250809	0.223	0.396	2.93313e-57	NC
Ifit3	2.30587e-61	0.417591	0.11	0.026	3.53259e-57	NC
Arhgef12	2.55443e-61	-0.226675	0.127	0.299	3.91338e-57	NC
Atp5g1	2.95235e-61	0.287899	0.752	0.648	4.523e-57	NC
Spata13	3.18882e-61	-0.227273	0.263	0.465	4.88527e-57	NC
Tbc1d5	3.66459e-61	-0.255563	0.264	0.431	5.61414e-57	NC
Tubb5	3.95778e-61	0.334753	0.741	0.739	6.06333e-57	NC
Abcc5	4.49928e-61	-0.256981	0.215	0.402	6.89289e-57	NC
Chd7	5.40574e-61	-0.23781	0.423	0.625	8.28159e-57	NC
Sec61g	5.65316e-61	0.277127	0.838	0.746	8.66063e-57	NC
Sema4g	7.10531e-61	-0.158283	0.028	0.15	1.08853e-56	NC
Ilvbl	7.62106e-61	-0.227012	0.198	0.387	1.16755e-56	NC
Ccni	8.96918e-61	-0.237916	0.508	0.678	1.37408e-56	NC
Bax	1.31447e-60	0.285702	0.703	0.595	2.01378e-56	NC
Pum1	1.39112e-60	-0.261921	0.314	0.465	2.13119e-56	NC
Mical3	1.40541e-60	-0.179635	0.041	0.168	2.1531e-56	NC
Efnb1	1.5864e-60	-0.184385	0.048	0.185	2.43037e-56	NC
Cnot8	1.68661e-60	-0.245944	0.309	0.478	2.58388e-56	NC
Smad1	1.78046e-60	-0.246162	0.179	0.354	2.72766e-56	NC
Hp1bp3	2.23841e-60	-0.279268	0.457	0.626	3.42924e-56	NC
Gm26735	2.29053e-60	-0.172735	0.018	0.129	3.50909e-56	NC
Glrx	2.31764e-60	0.232052	0.274	0.118	3.55063e-56	NC
Pum2	2.75959e-60	-0.256173	0.391	0.547	4.22769e-56	NC
H2-Q6	2.90763e-60	0.166641	0.14	0.034	4.4545e-56	NC
Gsto1	3.12773e-60	0.227529	0.332	0.16	4.79169e-56	NC
Mrpl54	3.4605e-60	0.253346	0.452	0.257	5.30149e-56	NC
Ankrd10	3.88932e-60	-0.246041	0.196	0.361	5.95844e-56	NC
Rab35	4.07293e-60	-0.246781	0.279	0.443	6.23973e-56	NC
Lefty1	4.54388e-60	-0.195379	0.074	0.22	6.96122e-56	NC
Ifi27	5.74234e-60	-0.259587	0.377	0.573	8.79726e-56	NC
Epsti1	5.98253e-60	0.323401	0.512	0.384	9.16524e-56	NC
Dopey2	5.99693e-60	-0.223279	0.129	0.294	9.1873e-56	NC
Derl2	6.16322e-60	-0.242977	0.392	0.571	9.44205e-56	NC
Hlf	6.48958e-60	-0.152644	0.016	0.123	9.94204e-56	NC
Yif1b	7.20287e-60	-0.246495	0.397	0.566	1.10348e-55	NC
Ube3a	7.79847e-60	-0.278146	0.421	0.566	1.19473e-55	NC
Akr1a1	8.99975e-60	0.244267	0.845	0.824	1.37876e-55	NC
Ak1	9.56817e-60	-0.186442	0.074	0.227	1.46584e-55	NC
Anxa6	9.82139e-60	0.23041	0.346	0.172	1.50464e-55	NC
Tbc1d14	9.89789e-60	-0.244521	0.204	0.382	1.51636e-55	NC
Cebpz	1.04231e-59	-0.270337	0.487	0.625	1.59683e-55	NC
Add3	1.05487e-59	0.324991	0.414	0.295	1.61606e-55	NC
Fkbp15	1.10432e-59	-0.261322	0.323	0.486	1.69181e-55	NC
C5ar1	1.27917e-59	-0.0759311	0.265	0.447	1.95968e-55	NC
Tvp23b	1.33334e-59	-0.234023	0.245	0.423	2.04268e-55	NC
Ggta1	1.80926e-59	-0.233758	0.186	0.369	2.77179e-55	NC
Zfp62	1.89439e-59	-0.252785	0.24	0.425	2.9022e-55	NC
Atp6v0a1	1.95937e-59	-0.249275	0.245	0.428	3.00175e-55	NC
Cers2	2.08261e-59	-0.249608	0.451	0.607	3.19056e-55	NC
Usp21	2.40552e-59	-0.215438	0.092	0.245	3.68526e-55	NC
Crot	2.43567e-59	-0.243349	0.186	0.356	3.73144e-55	NC
Tlr12	2.52864e-59	-0.176802	0.045	0.177	3.87388e-55	NC
Arsg	2.90352e-59	-0.177461	0.04	0.169	4.44819e-55	NC
Akirin1	2.94868e-59	-0.238402	0.418	0.595	4.51738e-55	NC
Nucb1	3.1155e-59	-0.251661	0.474	0.638	4.77295e-55	NC
Bid	3.27557e-59	-0.220296	0.121	0.286	5.01817e-55	NC
Zfp658	3.64748e-59	-0.196343	0.082	0.236	5.58795e-55	NC
Pja2	4.08233e-59	-0.238562	0.205	0.377	6.25413e-55	NC
Usp8	6.9981e-59	-0.252131	0.503	0.651	1.07211e-54	NC
Rere	7.69866e-59	-0.256073	0.281	0.441	1.17943e-54	NC
Adam17	9.3257e-59	-0.24887	0.403	0.577	1.4287e-54	NC
Nfix	9.44978e-59	-0.255818	0.333	0.497	1.44771e-54	NC
Ogt	9.94622e-59	-0.265095	0.508	0.664	1.52376e-54	NC
Oma1	1.07412e-58	-0.229504	0.154	0.316	1.64556e-54	NC
Tmem106b	2.01344e-58	-0.240821	0.224	0.404	3.08459e-54	NC
Mtmr6	2.18032e-58	-0.234005	0.241	0.399	3.34025e-54	NC
Gramd1a	2.38064e-58	-0.249779	0.243	0.41	3.64714e-54	NC
2020-09-11	2.60254e-58	0.205439	0.255	0.105	3.98709e-54	NC
Efcab14	2.63501e-58	-0.246315	0.21	0.387	4.03683e-54	NC
Ash1l	2.66806e-58	-0.264078	0.464	0.619	4.08747e-54	NC
Enc1	2.99071e-58	-0.246818	0.091	0.243	4.58177e-54	NC
I830077J02Rik	3.11676e-58	-0.237831	0.228	0.411	4.77488e-54	NC
Gpr146	3.76053e-58	-0.25768	0.221	0.393	5.76113e-54	NC
Sult1a1	5.41501e-58	-0.224797	0.151	0.321	8.2958e-54	NC
Kpnb1	5.84834e-58	-0.246856	0.307	0.474	8.95966e-54	NC
Ss18	7.71569e-58	-0.232087	0.211	0.372	1.18204e-53	NC
Anxa4	1.19243e-57	0.195551	0.274	0.119	1.8268e-53	NC
Pcmtd1	1.20925e-57	-0.256669	0.29	0.465	1.85256e-53	NC
Cep170	1.20984e-57	-0.260066	0.413	0.562	1.85347e-53	NC
Zfp24	1.39083e-57	-0.227976	0.145	0.304	2.13075e-53	NC
Fkbp1b	1.64972e-57	0.0869681	0.103	0.018	2.52737e-53	NC
Arhgap4	1.76916e-57	-0.233583	0.182	0.356	2.71035e-53	NC
Aftph	1.80459e-57	-0.262207	0.363	0.534	2.76464e-53	NC
Lpxn	1.83855e-57	-0.237949	0.277	0.426	2.81666e-53	NC
Ctnna1	2.29596e-57	0.28249	0.436	0.271	3.51742e-53	NC
Fkbp7	3.25425e-57	-0.186154	0.087	0.241	4.98551e-53	NC
Coq10b	3.42906e-57	0.302919	0.535	0.344	5.25331e-53	NC
Snrpf	3.63276e-57	0.260998	0.612	0.46	5.56539e-53	NC
Tm2d2	3.71195e-57	-0.22925	0.447	0.613	5.68671e-53	NC
Ccnt2	3.84633e-57	-0.258959	0.34	0.512	5.89258e-53	NC
Gm30329	5.11422e-57	-0.154595	0.03	0.147	7.83498e-53	NC
Mymk	6.23638e-57	-0.152182	0.019	0.125	9.55413e-53	NC
Atxn7l3b	6.407e-57	-0.259603	0.538	0.671	9.81553e-53	NC
Ap1s2	7.32183e-57	0.300621	0.488	0.335	1.1217e-52	NC
Saysd1	9.60353e-57	-0.23702	0.207	0.378	1.47126e-52	NC
Lpcat1	1.03587e-56	-0.241143	0.284	0.467	1.58696e-52	NC
Atp5f1	1.06448e-56	0.211455	0.823	0.815	1.63078e-52	NC
Kmt5b	1.12226e-56	-0.250541	0.277	0.447	1.7193e-52	NC
Chmp4b	1.17039e-56	0.267638	0.72	0.59	1.79304e-52	NC
Ndufa3	1.71836e-56	0.283522	0.645	0.483	2.63253e-52	NC
Zdhhc14	1.86893e-56	-0.17723	0.076	0.224	2.86319e-52	NC
Foxn2	2.3644e-56	0.176454	0.208	0.075	3.62225e-52	NC
Pitpnc1	3.02271e-56	-0.248402	0.216	0.397	4.63079e-52	NC
Spag9	3.16067e-56	0.324654	0.661	0.566	4.84214e-52	NC
Gpd2	3.41526e-56	0.131464	0.123	0.027	5.23219e-52	NC
Plcg1	4.26276e-56	-0.177072	0.058	0.188	6.53054e-52	NC
Ryk	4.6531e-56	-0.178951	0.076	0.223	7.12854e-52	NC
Eif3m	4.73479e-56	0.255958	0.696	0.585	7.25369e-52	NC
Heatr5a	5.0223e-56	-0.249894	0.257	0.433	7.69417e-52	NC
Npm3	7.26798e-56	0.201058	0.367	0.191	1.11345e-51	NC
Jkamp	9.19045e-56	-0.228873	0.226	0.397	1.40798e-51	NC
Borcs8	1.04941e-55	0.183953	0.226	0.088	1.6077e-51	NC
Tusc1	1.08939e-55	0.126773	0.128	0.03	1.66895e-51	NC
Khk	1.23847e-55	-0.243236	0.325	0.494	1.89734e-51	NC
Eid2	1.48144e-55	-0.182005	0.067	0.206	2.26957e-51	NC
Gm4673	1.6421e-55	-0.188907	0.072	0.213	2.51569e-51	NC
Tlr13	1.90698e-55	-0.219439	0.177	0.355	2.9215e-51	NC
4931406C07Rik	2.09758e-55	-0.236888	0.195	0.362	3.21349e-51	NC
Nxf1	2.13615e-55	-0.244023	0.352	0.509	3.27258e-51	NC
mt-Nd4	2.19232e-55	-0.116045	0.957	0.99	3.35863e-51	NC
Nudt16l1	2.30981e-55	-0.21888	0.191	0.352	3.53863e-51	NC
Arhgap39	3.03292e-55	-0.225574	0.214	0.39	4.64644e-51	NC
Leng8	3.30387e-55	-0.237467	0.188	0.355	5.06153e-51	NC
Srsf6	3.52864e-55	-0.241312	0.411	0.555	5.40587e-51	NC
Itch	4.15961e-55	-0.245975	0.435	0.607	6.37252e-51	NC
Cwf19l2	4.82073e-55	-0.252966	0.262	0.422	7.38535e-51	NC
Kansl1	4.87548e-55	-0.24425	0.357	0.499	7.46924e-51	NC
Rnf135	5.08316e-55	-0.181541	0.074	0.213	7.78741e-51	NC
Pcbp2	5.48437e-55	0.259968	0.748	0.645	8.40205e-51	NC
Tef	6.14422e-55	-0.196761	0.106	0.266	9.41295e-51	NC
Mag	7.17933e-55	-0.178784	0.065	0.202	1.09987e-50	NC
Zscan26	7.67241e-55	-0.242232	0.253	0.432	1.17541e-50	NC
Tmem115	7.79677e-55	-0.20392	0.117	0.264	1.19447e-50	NC
Cmya5	8.34918e-55	-0.159937	0.016	0.115	1.27909e-50	NC
Pgrmc1	9.86472e-55	-0.226201	0.243	0.412	1.51127e-50	NC
Rsbn1l	1.37217e-54	-0.228118	0.443	0.606	2.10216e-50	NC
Cerk	1.45952e-54	-0.222933	0.405	0.588	2.23598e-50	NC
4933406I18Rik	1.69954e-54	-0.160853	0.034	0.152	2.60369e-50	NC
Dennd2c	1.89649e-54	-0.159403	0.036	0.155	2.90542e-50	NC
Slc22a17	2.04245e-54	-0.176033	0.061	0.198	3.12904e-50	NC
Abcg2	2.04547e-54	-0.199581	0.137	0.302	3.13366e-50	NC
Stt3a	2.29357e-54	-0.241704	0.339	0.499	3.51375e-50	NC
Osm	2.78479e-54	0.476275	0.356	0.211	4.2663e-50	NC
Hnrnpf	2.83526e-54	0.194502	0.881	0.892	4.34362e-50	NC
Lactb	3.50894e-54	-0.25476	0.383	0.543	5.3757e-50	NC
Nectin4	3.68795e-54	-0.197613	0.109	0.265	5.64994e-50	NC
Tep1	3.8878e-54	0.245967	0.429	0.259	5.95611e-50	NC
Plscr3	3.97024e-54	-0.209304	0.157	0.31	6.08241e-50	NC
Irak3	3.98333e-54	0.11784	0.119	0.026	6.10246e-50	NC
Elk3	4.01508e-54	-0.225439	0.277	0.455	6.15111e-50	NC
Manea	4.66676e-54	-0.184527	0.075	0.206	7.14947e-50	NC
Mfsd11	4.72428e-54	-0.228072	0.223	0.406	7.23759e-50	NC
Sppl2a	4.79324e-54	-0.222377	0.635	0.747	7.34324e-50	NC
Pld3	5.06471e-54	0.0243083	0.347	0.476	7.75914e-50	NC
Tmem243	5.24498e-54	-0.2236	0.385	0.556	8.03531e-50	NC
E2f2	5.26682e-54	0.117971	0.103	0.02	8.06876e-50	NC
Maged2	5.76688e-54	-0.16784	0.057	0.189	8.83487e-50	NC
Nudcd3	6.57865e-54	-0.240558	0.276	0.431	1.00785e-49	NC
Wdfy3	6.80412e-54	-0.223029	0.227	0.396	1.04239e-49	NC
Grina	7.66959e-54	-0.238167	0.439	0.611	1.17498e-49	NC
Srsf2	9.07972e-54	-0.246157	0.624	0.764	1.39101e-49	NC
Fam114a2	1.01782e-53	-0.23499	0.324	0.48	1.55931e-49	NC
Tigd2	1.0524e-53	-0.238009	0.205	0.379	1.61228e-49	NC
Nfkb2	1.07116e-53	0.162691	0.222	0.086	1.64102e-49	NC
Dock8	1.24098e-53	-0.237709	0.563	0.676	1.90118e-49	NC
Insig2	1.3354e-53	-0.229958	0.196	0.356	2.04583e-49	NC
Cmpk1	1.37903e-53	0.277884	0.636	0.489	2.11267e-49	NC
Supt20	1.80851e-53	-0.246425	0.289	0.456	2.77064e-49	NC
Mdfi	2.27637e-53	-0.138748	0.025	0.133	3.48739e-49	NC
Rnf139	2.50515e-53	-0.210066	0.145	0.296	3.83789e-49	NC
Slc26a2	3.10085e-53	-0.216438	0.127	0.278	4.7505e-49	NC
Zbtb18	3.13649e-53	-0.224969	0.259	0.438	4.80511e-49	NC
Ralb	3.677e-53	-0.239594	0.433	0.585	5.63317e-49	NC
Acot7	4.11312e-53	0.112031	0.131	0.033	6.30131e-49	NC
Plod3	4.12376e-53	-0.230678	0.409	0.593	6.3176e-49	NC
Arfgap2	4.32044e-53	-0.227333	0.308	0.446	6.61892e-49	NC
Ypel3	5.53922e-53	-0.188159	0.695	0.836	8.48608e-49	NC
Tiprl	5.88225e-53	-0.218677	0.289	0.452	9.01161e-49	NC
Mpeg1	6.02677e-53	0.0496033	0.85	0.955	9.23301e-49	NC
Ctnnd1	6.15617e-53	-0.208412	0.134	0.288	9.43125e-49	NC
Setd2	6.44774e-53	-0.257312	0.327	0.474	9.87793e-49	NC
Gfm2	6.81255e-53	-0.204303	0.091	0.232	1.04368e-48	NC
Pigk	8.49193e-53	-0.220774	0.284	0.427	1.30096e-48	NC
Fam120b	9.02204e-53	-0.2289	0.148	0.307	1.38218e-48	NC
Taok1	1.08813e-52	-0.246267	0.395	0.544	1.66702e-48	NC
Rffl	1.11897e-52	-0.195335	0.108	0.258	1.71426e-48	NC
Dhrs7b	1.18768e-52	-0.213255	0.204	0.364	1.81953e-48	NC
Acot9	1.21291e-52	0.190531	0.255	0.11	1.85818e-48	NC
Zfp120	1.42281e-52	-0.226787	0.174	0.336	2.17974e-48	NC
Gnpda2	2.09271e-52	-0.206163	0.141	0.291	3.20603e-48	NC
Sncaip	2.25085e-52	-0.146234	0.029	0.141	3.44831e-48	NC
Relt	2.97589e-52	0.120031	0.14	0.038	4.55906e-48	NC
Ctbp2	3.28168e-52	-0.226621	0.221	0.383	5.02753e-48	NC
Fcgr4	3.43456e-52	0.300694	0.172	0.092	5.26175e-48	NC
Nt5c	4.5632e-52	0.232989	0.464	0.285	6.99082e-48	NC
Pard3b	5.03083e-52	-0.140872	0.023	0.127	7.70723e-48	NC
Vapa	5.52769e-52	-0.198819	0.755	0.855	8.46842e-48	NC
Vps9d1	5.97832e-52	-0.237256	0.221	0.382	9.15879e-48	NC
Fam129b	6.37628e-52	0.110668	0.128	0.032	9.76846e-48	NC
Bex3	6.65174e-52	0.187925	0.211	0.083	1.01905e-47	NC
Manf	7.13392e-52	-0.140489	0.655	0.814	1.09292e-47	NC
Trim35	7.80212e-52	-0.214644	0.243	0.421	1.19529e-47	NC
Impact	7.94531e-52	-0.272271	0.241	0.407	1.21722e-47	NC
Kbtbd2	8.10096e-52	-0.222215	0.198	0.356	1.24107e-47	NC
Cbr1	8.7101e-52	-0.211481	0.192	0.354	1.33439e-47	NC
Cldnd1	1.25981e-51	-0.226883	0.433	0.584	1.93003e-47	NC
9930021J03Rik	1.3009e-51	-0.227843	0.198	0.352	1.99299e-47	NC
Slc33a1	1.42417e-51	-0.188216	0.097	0.234	2.18183e-47	NC
Plcl1	1.64066e-51	-0.204875	0.132	0.29	2.5135e-47	NC
Atf7ip	1.73837e-51	-0.249192	0.358	0.515	2.66318e-47	NC
Tmem140	1.7498e-51	-0.17802	0.111	0.267	2.68069e-47	NC
Isg20	2.08542e-51	0.172697	0.111	0.027	3.19487e-47	NC
Cask	2.14173e-51	-0.271167	0.186	0.336	3.28114e-47	NC
Lgals8	2.46823e-51	-0.209414	0.256	0.428	3.78133e-47	NC
Naxd	2.94567e-51	-0.224047	0.32	0.455	4.51276e-47	NC
Cct5	2.96363e-51	0.248977	0.689	0.573	4.54028e-47	NC
Pqlc1	3.07953e-51	0.141349	0.165	0.053	4.71783e-47	NC
Smpd1	3.25027e-51	-0.201001	0.152	0.304	4.97942e-47	NC
Rbbp8	3.41207e-51	0.126251	0.151	0.045	5.22729e-47	NC
Cyp4f16	3.46761e-51	0.158583	0.15	0.046	5.31237e-47	NC
Krit1	3.71283e-51	-0.254574	0.363	0.517	5.68805e-47	NC
Gkap1	4.40305e-51	-0.198715	0.143	0.305	6.74547e-47	NC
Txndc12	5.19246e-51	-0.215976	0.227	0.374	7.95485e-47	NC
Zfp36l1	5.47989e-51	-0.264746	0.619	0.787	8.39519e-47	NC
Ppp1r3b	8.19976e-51	-0.199741	0.092	0.232	1.2562e-46	NC
Fam58b	9.21697e-51	-0.204603	0.174	0.331	1.41204e-46	NC
Cks1b	9.52316e-51	0.166151	0.123	0.033	1.45895e-46	NC
Me2	9.70882e-51	0.165463	0.239	0.101	1.48739e-46	NC
Cln8	1.12105e-50	-0.234989	0.265	0.44	1.71745e-46	NC
Chmp2a	1.22521e-50	0.26767	0.721	0.598	1.87701e-46	NC
Zbtb37	1.59799e-50	-0.206721	0.106	0.25	2.44812e-46	NC
Galnt4	1.6217e-50	-0.160264	0.053	0.178	2.48445e-46	NC
Camsap1	1.8691e-50	-0.200421	0.118	0.266	2.86347e-46	NC
Abcd2	2.01245e-50	-0.227154	0.263	0.438	3.08307e-46	NC
Mtfr1l	2.11249e-50	-0.220633	0.336	0.486	3.23634e-46	NC
Gm11808	2.57586e-50	0.21282	0.374	0.207	3.94622e-46	NC
Trim65	2.60141e-50	-0.19155	0.087	0.219	3.98536e-46	NC
Senp2	2.86299e-50	-0.264822	0.461	0.606	4.3861e-46	NC
Arid3b	2.94067e-50	-0.196423	0.118	0.269	4.5051e-46	NC
Amfr	3.32025e-50	-0.216572	0.31	0.466	5.08662e-46	NC
Tnfaip2	3.57515e-50	0.297824	0.271	0.145	5.47712e-46	NC
Lrrfip2	3.71851e-50	0.216946	0.377	0.209	5.69676e-46	NC
Lactb2	3.81127e-50	-0.224013	0.21	0.365	5.83886e-46	NC
Csnk1a1	5.526e-50	-0.219582	0.69	0.784	8.46583e-46	NC
Map1s	5.66423e-50	-0.215471	0.178	0.335	8.6776e-46	NC
Agps	6.15419e-50	-0.233424	0.316	0.462	9.42822e-46	NC
Mpi	6.18034e-50	-0.175655	0.08	0.212	9.46829e-46	NC
Cd276	7.77236e-50	-0.127734	0.017	0.111	1.19073e-45	NC
Gltp	8.00596e-50	0.263936	0.67	0.536	1.22651e-45	NC
Uqcrb	8.13159e-50	0.235751	0.762	0.681	1.24576e-45	NC
Pknox1	8.36096e-50	-0.190561	0.125	0.275	1.2809e-45	NC
BC005561	1.04923e-49	-0.264675	0.231	0.384	1.60742e-45	NC
1810058I24Rik	1.21403e-49	0.239487	0.52	0.341	1.85989e-45	NC
Lrrc39	1.28793e-49	-0.122585	0.014	0.104	1.97311e-45	NC
Il7r	1.36922e-49	-0.216964	0.108	0.254	2.09764e-45	NC
Yae1d1	1.61499e-49	-0.212864	0.198	0.359	2.47416e-45	NC
AW112010	2.38828e-49	0.473259	0.296	0.207	3.65885e-45	NC
Mesd	2.86809e-49	-0.217794	0.249	0.408	4.39391e-45	NC
Cd68	2.89368e-49	-0.00312005	0.867	0.962	4.43312e-45	NC
Slamf8	3.25477e-49	0.208275	0.272	0.127	4.9863e-45	NC
G6pc3	3.36026e-49	-0.205962	0.176	0.325	5.14792e-45	NC
Rnf213	3.79042e-49	0.247035	0.294	0.158	5.80692e-45	NC
S1pr1	3.81299e-49	-0.208392	0.106	0.254	5.8415e-45	NC
Fyco1	4.00904e-49	-0.216409	0.158	0.306	6.14185e-45	NC
Spire1	4.0477e-49	-0.212477	0.324	0.505	6.20108e-45	NC
Trpm4	4.22915e-49	-0.17184	0.087	0.227	6.47906e-45	NC
Irgm2	4.27978e-49	-0.162926	0.056	0.18	6.55663e-45	NC
Hmgn1	4.39741e-49	-0.152911	0.486	0.671	6.73683e-45	NC
Slc38a9	4.46941e-49	-0.237759	0.228	0.385	6.84714e-45	NC
Itgb3	5.0545e-49	-0.154315	0.052	0.176	7.74349e-45	NC
Lst1	5.1477e-49	0.309054	0.642	0.698	7.88628e-45	NC
Akap9	5.77122e-49	-0.250078	0.457	0.585	8.84151e-45	NC
Maged1	6.42709e-49	-0.161219	0.082	0.22	9.8463e-45	NC
Ppp5c	6.54486e-49	-0.209414	0.184	0.332	1.00267e-44	NC
Lamtor2	6.76369e-49	0.254234	0.69	0.563	1.0362e-44	NC
Xrcc5	7.81768e-49	-0.133199	0.03	0.135	1.19767e-44	NC
Zfp445	8.25385e-49	-0.229763	0.22	0.366	1.26449e-44	NC
Atxn1	8.93131e-49	-0.183207	0.08	0.215	1.36828e-44	NC
Jak1	9.23428e-49	-0.212294	0.648	0.748	1.41469e-44	NC
Gmnn	9.70008e-49	0.153553	0.133	0.037	1.48605e-44	NC
Fubp1	1.07605e-48	-0.236509	0.525	0.67	1.64851e-44	NC
Fam3c	1.13473e-48	-0.219724	0.24	0.405	1.7384e-44	NC
Bri3	1.31171e-48	0.244429	0.896	0.885	2.00955e-44	NC
Dapk1	1.53396e-48	0.162399	0.192	0.072	2.35003e-44	NC
Kcnd1	1.64897e-48	-0.151375	0.05	0.166	2.52622e-44	NC
Zbtb1	1.82537e-48	-0.233352	0.21	0.362	2.79647e-44	NC
Arf1	1.85095e-48	-0.183846	0.822	0.904	2.83565e-44	NC
Aga	2.02956e-48	-0.213304	0.252	0.407	3.10928e-44	NC
H2-T22	2.10918e-48	0.221573	0.35	0.194	3.23126e-44	NC
Tbca	2.30016e-48	0.250798	0.715	0.617	3.52385e-44	NC
Lgals9	2.4854e-48	-0.218321	0.411	0.579	3.80764e-44	NC
Trmt1l	2.49572e-48	-0.213319	0.17	0.32	3.82344e-44	NC
Stxbp5	2.68552e-48	-0.190197	0.123	0.268	4.11422e-44	NC
Otud1	2.70813e-48	-0.224085	0.12	0.273	4.14885e-44	NC
Rgs19	2.77147e-48	-0.224561	0.411	0.541	4.24589e-44	NC
Mbtps2	2.93729e-48	-0.184927	0.102	0.24	4.49993e-44	NC
Map2k1	3.15415e-48	-0.215033	0.365	0.521	4.83216e-44	NC
Neurl1a	3.91582e-48	-0.144473	0.035	0.141	5.99904e-44	NC
Dmtf1	4.0976e-48	-0.223794	0.23	0.383	6.27752e-44	NC
Map1lc3a	4.85515e-48	-0.218683	0.387	0.555	7.43809e-44	NC
Hspa4l	4.89693e-48	0.146709	0.137	0.039	7.5021e-44	NC
Extl3	4.89784e-48	-0.213323	0.19	0.343	7.5035e-44	NC
Angel2	4.91294e-48	-0.234803	0.261	0.418	7.52663e-44	NC
Mysm1	6.13906e-48	-0.238762	0.308	0.455	9.40503e-44	NC
Man2a2	7.58841e-48	-0.219456	0.191	0.339	1.16254e-43	NC
4933434E20Rik	8.64956e-48	-0.210792	0.389	0.527	1.32511e-43	NC
Gapvd1	8.96312e-48	-0.228241	0.336	0.47	1.37315e-43	NC
Il4ra	9.0339e-48	-0.220152	0.249	0.41	1.38399e-43	NC
Jund	9.31916e-48	-0.438809	0.88	0.936	1.42769e-43	NC
Dennd4a	9.4502e-48	-0.110838	0.614	0.782	1.44777e-43	NC
Brd1	9.68134e-48	-0.228368	0.428	0.558	1.48318e-43	NC
Srpk3	9.88691e-48	-0.135999	0.037	0.148	1.51467e-43	NC
Zyg11b	1.01096e-47	-0.21335	0.15	0.295	1.54878e-43	NC
Stambpl1	1.12034e-47	-0.198635	0.137	0.277	1.71635e-43	NC
Fyttd1	1.21355e-47	-0.220573	0.247	0.404	1.85916e-43	NC
Tom1l1	1.3549e-47	-0.147393	0.049	0.167	2.07571e-43	NC
Sar1b	1.37302e-47	-0.207254	0.458	0.6	2.10347e-43	NC
Usmg5	1.42247e-47	0.260911	0.546	0.379	2.17922e-43	NC
B4galnt1	1.59431e-47	0.259791	0.315	0.17	2.44249e-43	NC
Lacc1	1.87487e-47	-0.167695	0.415	0.601	2.8723e-43	NC
Asap3	2.04597e-47	-0.133454	0.029	0.129	3.13443e-43	NC
Mark3	2.11421e-47	-0.233415	0.334	0.485	3.23897e-43	NC
Msi2	2.17923e-47	-0.199116	0.127	0.269	3.33859e-43	NC
Slc24a3	2.68792e-47	-0.136674	0.028	0.129	4.1179e-43	NC
Fh1	3.05922e-47	0.219358	0.333	0.186	4.68673e-43	NC
Cracr2b	3.08245e-47	-0.169365	0.075	0.206	4.72231e-43	NC
B3galt5	3.7932e-47	-0.14887	0.05	0.169	5.81118e-43	NC
Fmc1	3.91359e-47	0.167953	0.225	0.095	5.99562e-43	NC
Cbx1	4.04553e-47	-0.236455	0.391	0.533	6.19775e-43	NC
Itfg1	4.23504e-47	-0.203195	0.228	0.375	6.48808e-43	NC
Hspa13	4.48739e-47	-0.202144	0.164	0.318	6.87469e-43	NC
Sik2	4.84701e-47	-0.225923	0.177	0.326	7.42562e-43	NC
Fam46c	4.95726e-47	-0.105343	0.401	0.578	7.59452e-43	NC
Atp2b1	5.08766e-47	0.288652	0.758	0.736	7.79429e-43	NC
Pecam1	5.09085e-47	-0.127087	0.071	0.197	7.79919e-43	NC
Hfe	5.10855e-47	-0.116789	0.443	0.626	7.82629e-43	NC
Arhgap9	5.2009e-47	0.217345	0.376	0.217	7.96778e-43	NC
Nfatc1	5.26862e-47	-0.208188	0.202	0.348	8.07153e-43	NC
9530068E07Rik	5.38016e-47	-0.210647	0.403	0.549	8.2424e-43	NC
Emc10	6.54618e-47	-0.21715	0.481	0.614	1.00288e-42	NC
Gxylt1	6.66527e-47	-0.219034	0.228	0.375	1.02112e-42	NC
Ost4	6.90882e-47	0.243278	0.731	0.633	1.05843e-42	NC
Gbp7	7.61622e-47	-0.225116	0.203	0.363	1.1668e-42	NC
Yipf5	7.96e-47	-0.209303	0.211	0.361	1.21947e-42	NC
Col15a1	8.61053e-47	-0.15209	0.047	0.155	1.31913e-42	NC
Fam193a	9.9614e-47	-0.227202	0.251	0.394	1.52609e-42	NC
Hsd17b4	1.07166e-46	-0.206253	0.401	0.544	1.64178e-42	NC
Ext2	1.07372e-46	-0.195296	0.16	0.306	1.64495e-42	NC
Siah1a	1.08061e-46	-0.185752	0.129	0.275	1.6555e-42	NC
Ttc13	1.08337e-46	-0.186189	0.098	0.223	1.65972e-42	NC
B4galt5	1.11502e-46	0.167807	0.175	0.063	1.70821e-42	NC
Gm38843	1.33324e-46	-0.168524	0.08	0.211	2.04252e-42	NC
Tmc7	1.58426e-46	-0.140901	0.036	0.142	2.42709e-42	NC
Ormdl3	2.32258e-46	-0.178729	0.13	0.279	3.5582e-42	NC
Mib2	2.3887e-46	-0.171522	0.097	0.229	3.6595e-42	NC
Zmynd8	2.64201e-46	-0.229185	0.287	0.441	4.04756e-42	NC
Fcho2	2.72795e-46	-0.219281	0.585	0.692	4.17922e-42	NC
Peli1	2.76036e-46	-0.234052	0.425	0.589	4.22888e-42	NC
Dnmt3a	2.81797e-46	-0.210168	0.316	0.491	4.31713e-42	NC
Tra2a	2.9027e-46	-0.230933	0.652	0.767	4.44694e-42	NC
Wdr45b	3.35362e-46	-0.213474	0.253	0.398	5.13774e-42	NC
Slc39a8	3.45186e-46	-0.149911	0.048	0.155	5.28824e-42	NC
Fosb	4.69556e-46	0.178831	0.383	0.22	7.19359e-42	NC
Fbxl3	4.83198e-46	-0.211768	0.26	0.415	7.40259e-42	NC
Klf12	4.83452e-46	-0.128412	0.022	0.116	7.40649e-42	NC
D930030I03Rik	4.97375e-46	0.09713	0.108	0.025	7.61979e-42	NC
Gm32036	5.11133e-46	-0.174897	0.07	0.193	7.83056e-42	NC
Atp5j	5.70045e-46	0.23505	0.816	0.747	8.73308e-42	NC
[truncated: 5,641 more rows]
