# Supplementary material for: A MAC2-positive progenitor-like microglial population is resistant to CSF1R inhibition in adult mouse brain
Source: eLife. 2020 Oct 15;9:e51796. doi: 10.7554/eLife.51796 (PMC7591254; doi:10.7554/eLife.51796)
Supplement: Figure 7—source data 1. [file elife-51796-fig7-data1.xlsx]

## Sheet: mac2_ctrl_vs_homeostatic
	p_val	avg_logFC	pct.1	pct.2	p_val_adj
Cd74	0	4.64836	0.781	0.15	0
Lyz2	0	3.5457	0.956	0.773	0
Ifitm3	0	3.24625	0.799	0.069	0
Cybb	0	2.53236	0.81	0.007	0
Lgals3	0	2.51374	1	0.006	0
Ifitm2	0	2.35832	0.741	0.019	0
Fxyd5	0	2.19374	0.825	0.046	0
Tmsb10	0	2.00931	0.847	0.523	0
Lsp1	0	1.90363	0.825	0.336	0
Cd52	0	1.67099	0.949	0.746	0
Ms4a6c	0	1.62717	0.777	0.321	0
H2-D1	0	1.54836	0.971	0.9	0
Ctss	0	-0.68634	0.982	1	0
Itm2b	0	-0.760131	0.985	1	0
Serinc3	0	-0.950893	0.898	0.999	0
Csf1r	0	-0.96495	0.905	0.999	0
Marcks	0	-1.06811	0.843	0.999	0
Ctsd	0	-1.10461	0.861	1	0
Rgs10	0	-1.14913	0.755	0.997	0
C1qb	0	-1.16468	0.701	1	0
Cd81	0	-1.17647	0.635	0.999	0
Lpcat2	0	-1.2087	0.668	0.993	0
Cst3	0	-1.20896	0.996	1	0
Trem2	0	-1.23513	0.584	1	0
C1qc	0	-1.24544	0.599	1	0
C1qa	0	-1.24606	0.664	1	0
Cx3cr1	0	-1.3042	0.876	1	0
Lgmn	0	-1.41061	0.748	0.999	0
Fcrls	0	-1.46292	0.529	0.997	0
Hexb	0	-1.47352	0.912	1	0
Selplg	0	-1.48145	0.865	0.999	0
Gpr34	0	-1.59606	0.434	0.999	0
Olfml3	0	-1.61182	0.412	0.997	0
Siglech	0	-1.6366	0.343	0.994	0
Sparc	0	-1.70524	0.456	1	0
Tmem119	0	-1.72686	0.354	0.998	0
P2ry12	0	-1.90369	0.431	1	0
Iqgap1	1.21887436670691e-312	1.77317	0.814	0.054	0
Napsa	2.78588e-307	2.02871	0.682	0.001	4.26797e-303
Srgn	1.63926e-288	1.32054	0.934	0.788	2.51135e-284
Selenop	3.49435e-282	-0.984127	0.781	0.997	5.35334e-278
Ctsl	4.67545e-279	-1.08862	0.562	0.994	7.16279e-275
Gpx1	2.04691e-278	1.40035	0.942	0.816	3.13587e-274
Smpdl3a	6.63497e-277	1.5058	0.69	0.209	1.01648e-272
Vsir	1.60829e-271	-1.01125	0.741	0.996	2.4639e-267
Msrb1	1.00537e-268	1.84727	0.653	0.146	1.54023e-264
H2-Ab1	2.1446e-268	3.61692	0.456	0.078	3.28553e-264
Plbd1	5.19056e-268	1.37874	0.617	0.001	7.95194e-264
Adgre5	6.55677e-268	1.57835	0.624	0.002	1.0045e-263
Itgb5	1.38765e-261	-1.14823	0.555	0.99	2.12588e-257
Vim	5.87717e-260	2.35215	0.672	0.02	9.00382e-256
Emp3	7.57397e-260	1.55117	0.774	0.186	1.16033e-255
Qk	9.51123e-259	-1.08349	0.741	0.994	1.45712e-254
Crip1	5.1471e-257	2.37448	0.646	0.057	7.88535e-253
Itga4	1.09714e-248	1.49703	0.642	0.007	1.68082e-244
S100a6	1.52346e-245	2.24338	0.591	0.005	2.33394e-241
S100a4	2.63155e-245	2.02397	0.599	0.01	4.03154e-241
P2ry13	4.03303e-242	-1.44575	0.292	0.975	6.1786e-238
Arhgap5	8.92053e-242	-1.36955	0.434	0.982	1.36663e-237
Anxa2	7.35647e-241	1.51662	0.606	0.006	1.12701e-236
Rpsa	3.87264e-236	1.08173	0.993	0.977	5.93288e-232
Stap1	1.77401e-235	1.22648	0.558	0.001	2.71778e-231
Fcgr3	1.97914e-235	-0.988605	0.715	0.993	3.03204e-231
Plxdc2	3.38704e-233	-1.3152	0.321	0.977	5.18894e-229
Basp1	9.83145e-233	-0.953065	0.515	0.995	1.50618e-228
Hpgds	1.38012e-231	-1.26191	0.383	0.984	2.11434e-227
H3f3a	3.40402e-231	1.11997	0.989	0.96	5.21497e-227
Bin1	4.4643e-229	-1.04614	0.562	0.988	6.83931e-225
H2-K1	1.00611e-228	1.23613	0.953	0.881	1.54136e-224
Ahnak	3.20248e-226	1.57013	0.536	0.002	4.9062e-222
Anxa5	6.0058e-223	1.20084	0.719	0.216	9.20088e-219
Ly86	1.36698e-222	-0.855938	0.821	0.998	2.09421e-218
S100a11	1.86764e-221	1.49657	0.639	0.033	2.86123e-217
Ptgs1	1.8636e-220	-1.30867	0.31	0.967	2.85504e-216
Pmepa1	8.30809e-216	-1.25541	0.42	0.985	1.2728e-211
Cytip	1.81648e-214	1.42067	0.631	0.031	2.78285e-210
Ifitm6	2.27301e-214	1.57539	0.507	0.001	3.48225e-210
Clec12a	2.56347e-214	0.892955	0.511	0.001	3.92724e-210
Cd44	1.6708e-213	1.22595	0.544	0.004	2.55966e-209
Gsr	1.96641e-205	1.30753	0.547	0.132	3.01254e-201
Rhob	1.98436e-201	-1.33269	0.62	0.992	3.04003e-197
Tgfbr1	5.84942e-201	-1.02771	0.635	0.991	8.96131e-197
Rnase4	9.07608e-200	-1.26031	0.434	0.97	1.39045e-195
Calm1	2.25699e-198	1.11664	0.967	0.871	3.4577e-194
Rps19	1.94103e-197	0.977251	0.982	0.981	2.97366e-193
Flna	1.12226e-195	1.37676	0.686	0.147	1.71931e-191
Ltc4s	8.88939e-194	-1.33402	0.31	0.955	1.36185e-189
Cxcr4	3.08821e-193	1.15091	0.489	0.003	4.73114e-189
Itgal	3.98206e-192	1.65682	0.471	0.002	6.10052e-188
Samhd1	4.72596e-192	1.20039	0.777	0.41	7.24017e-188
H2-Aa	1.44644e-191	3.70135	0.427	0.022	2.21595e-187
Sh3bgrl	5.47507e-190	1.04675	0.635	0.042	8.38781e-186
Cyp4f18	1.5248e-188	1.06151	0.482	0.003	2.33599e-184
Emb	1.61675e-187	1.03484	0.471	0.003	2.47686e-183
Plac8	7.20926e-187	2.32853	0.464	0.008	1.10446e-182
Golm1	3.59607e-184	-1.21693	0.369	0.959	5.50919e-180
H2-Eb1	1.99152e-183	3.67481	0.409	0.025	3.05101e-179
Ifi27l2a	1.50614e-182	1.92928	0.609	0.07	2.30741e-178
Fgr	4.95505e-182	1.17849	0.544	0.016	7.59114e-178
Pim1	5.7311e-182	1.59144	0.602	0.073	8.78005e-178
Unc119	3.45138e-179	0.87874	0.453	0.002	5.28752e-175
Klra2	5.43021e-176	0.763337	0.434	0.001	8.31909e-172
Emilin2	2.57702e-174	0.834962	0.42	0.001	3.94799e-170
F11r	3.69113e-173	-1.04097	0.416	0.968	5.65481e-169
Apoe	7.2745e-173	2.9899	0.777	0.48	1.11445e-168
Actg1	4.9993e-172	1.12099	0.993	0.974	7.65893e-168
Maf	1.26628e-170	-1.15649	0.405	0.963	1.93994e-166
Ifi207	1.10548e-169	0.730426	0.442	0.003	1.6936e-165
Ldhb	3.07734e-169	-1.11468	0.38	0.952	4.71449e-165
Epb41l2	8.00509e-169	-1.09831	0.555	0.975	1.22638e-164
Wfdc17	2.22954e-168	1.63089	0.5	0.015	3.41566e-164
Rara	4.95712e-168	0.701214	0.405	0.001	7.59431e-164
Zfhx3	7.69688e-168	-1.14547	0.493	0.962	1.17916e-163
Slc2a5	8.48848e-168	-1.25406	0.168	0.887	1.30044e-163
Itgb7	2.69668e-167	0.802572	0.42	0.002	4.13131e-163
Ecscr	4.14586e-167	-1.16616	0.226	0.916	6.35145e-163
Metrnl	8.53786e-167	1.0719	0.595	0.048	1.308e-162
Actr3	1.26089e-165	0.851389	0.92	0.794	1.93169e-161
Anxa1	1.30604e-165	0.939802	0.401	0.001	2.00085e-161
Mcemp1	1.74719e-164	0.852787	0.412	0.001	2.67669e-160
Mcub	5.43773e-164	0.637845	0.434	0.003	8.3306e-160
Srgap2	6.78839e-164	-1.11738	0.485	0.961	1.03998e-159
Clec4a1	3.14313e-163	1.19082	0.544	0.029	4.81527e-159
Cmtm6	1.04725e-162	-0.99512	0.584	0.962	1.60439e-158
AB124611	1.91199e-161	0.840669	0.518	0.016	2.92917e-157
Gm2a	4.43926e-159	0.981283	0.828	0.612	6.80095e-155
Mndal	7.25739e-159	0.773141	0.398	0.001	1.11183e-154
Tanc2	1.37018e-158	-1.14102	0.263	0.921	2.09912e-154
Gpr141	8.46717e-158	0.697534	0.372	0	1.29717e-153
Sh3bgrl3	5.63289e-157	0.813361	0.964	0.945	8.62958e-153
Scoc	6.60587e-157	-1.12564	0.35	0.941	1.01202e-152
Gpr132	7.65034e-157	0.677298	0.391	0.001	1.17203e-152
Serpine2	1.56166e-156	-1.08697	0.274	0.927	2.39247e-152
Myl6	6.53681e-156	0.859473	0.942	0.853	1.00144e-151
Arpc1b	9.4026e-156	0.790537	0.956	0.942	1.44048e-151
Rplp0	9.68306e-153	0.812902	0.996	0.988	1.48344e-148
Mef2c	1.33959e-149	-0.864586	0.792	0.993	2.05224e-145
Ear2	1.41204e-149	1.66447	0.369	0.001	2.16325e-145
Spn	8.51967e-149	1.1054	0.365	0.001	1.30521e-144
Frmd4a	9.38024e-149	-1.08976	0.354	0.935	1.43705e-144
Coro1a	1.19955e-148	0.960232	0.945	0.928	1.83772e-144
Sirpb1c	5.02975e-148	0.727612	0.354	0	7.70557e-144
Myo1g	8.64851e-148	1.20466	0.577	0.114	1.32495e-143
Plin2	2.02288e-147	1.20752	0.646	0.152	3.09905e-143
Nav2	4.64672e-147	-1.18313	0.208	0.88	7.11878e-143
Lilrb4a	7.7329e-147	0.8122	0.438	0.007	1.18468e-142
Lgals1	3.23056e-146	1.04976	0.46	0.015	4.94922e-142
Gm21188	3.38829e-146	0.64951	0.35	0	5.19085e-142
Slco2b1	3.54215e-145	-1.04491	0.314	0.922	5.42657e-141
Aif1	6.39804e-145	-0.745032	0.664	0.984	9.8018e-141
Mafb	2.29173e-144	-1.0572	0.558	0.983	3.51094e-140
Mrpl33	2.46913e-144	0.949303	0.73	0.335	3.7827e-140
Cfh	2.78876e-142	-0.966911	0.478	0.959	4.27238e-138
Sem1	1.00522e-141	0.8646	0.876	0.706	1.54e-137
Adgrg1	2.13995e-141	-1.05364	0.201	0.871	3.27841e-137
Ptprc	4.67694e-141	0.937717	0.905	0.858	7.16507e-137
Hp	1.00899e-140	1.30026	0.361	0.002	1.54578e-136
Mertk	1.03446e-140	-1.07381	0.248	0.896	1.58479e-136
Trps1	1.43285e-140	0.706066	0.526	0.025	2.19513e-136
Lilr4b	3.29513e-140	0.70545	0.398	0.005	5.04815e-136
Alcam	5.72858e-140	0.539128	0.35	0.001	8.77619e-136
Mtdh	9.44496e-140	-0.737576	0.843	0.989	1.44697e-135
Arhgap15	1.41817e-139	0.74194	0.511	0.022	2.17263e-135
Anxa3	4.70698e-139	-0.812392	0.496	0.965	7.21109e-135
Slfn2	1.04382e-138	1.09363	0.719	0.154	1.59913e-134
Ccr2	9.4177e-138	1.3994	0.405	0.031	1.44279e-133
S100a10	9.50387e-138	1.20619	0.42	0.091	1.45599e-133
Rps16	1.99637e-137	0.754326	0.996	0.993	3.05843e-133
Abhd12	2.42139e-137	-0.814036	0.704	0.978	3.70957e-133
Tmem51	5.47441e-137	0.538337	0.339	0.001	8.38679e-133
Eno3	6.1291e-137	1.15008	0.339	0.129	9.38978e-133
Ms4a4c	2.41797e-136	1.16599	0.416	0.011	3.70433e-132
Rasgrp2	2.52479e-136	0.843265	0.369	0.003	3.86797e-132
Scamp2	9.69347e-135	-0.889984	0.635	0.963	1.48504e-130
Crybb1	2.30909e-134	-1.24915	0.285	0.892	3.53753e-130
Aldh2	2.93066e-134	0.873911	0.715	0.312	4.48977e-130
Entpd1	3.10771e-134	-1.00592	0.405	0.925	4.76101e-130
Cd164	2.09665e-133	-1.06254	0.376	0.912	3.21207e-129
Rps5	3.96636e-133	0.786678	0.985	0.985	6.07646e-129
Traf1	4.96115e-133	0.719196	0.358	0.003	7.60048e-129
Adgre4	8.72196e-133	1.20566	0.398	0.011	1.3362e-128
Bhlhe40	1.74181e-132	0.87253	0.365	0.004	2.66846e-128
Gda	2.11958e-132	0.653569	0.343	0.002	3.24719e-128
Cd300ld	6.23004e-132	1.05526	0.405	0.009	9.54442e-128
Tpm4	6.81199e-132	0.899456	0.693	0.154	1.0436e-127
Ezr	3.90098e-131	0.791173	0.42	0.011	5.9763e-127
Cnn2	1.4887e-130	0.925829	0.602	0.103	2.28069e-126
Tkt	4.72452e-130	0.889303	0.836	0.584	7.23796e-126
Pla2g7	9.03242e-130	1.10674	0.391	0.01	1.38377e-125
Mgst1	1.62849e-129	1.03547	0.332	0.002	2.49485e-125
Glul	2.22171e-129	-1.11556	0.507	0.945	3.40366e-125
Nadk	9.87911e-129	0.954618	0.631	0.274	1.51348e-124
C3	1.24043e-128	0.654854	0.318	0.001	1.90034e-124
Tgfbi	4.47788e-128	0.988838	0.54	0.184	6.86012e-124
Ace	9.19183e-128	1.18168	0.314	0.001	1.40819e-123
Laptm5	1.19259e-127	-0.463805	0.978	1	1.82704e-123
Syngr1	3.32633e-127	-0.771075	0.296	0.912	5.09594e-123
Rack1	4.73271e-127	0.74811	0.971	0.96	7.25051e-123
Ifi203	7.46643e-127	0.716183	0.318	0.001	1.14386e-122
Camk1	7.79454e-127	-0.898785	0.482	0.945	1.19412e-122
Zbp1	1.55404e-126	0.723403	0.376	0.006	2.38079e-122
Ccdc88c	4.77845e-126	0.624925	0.314	0.001	7.32059e-122
Cd37	1.36417e-125	-0.952026	0.526	0.944	2.0899e-121
St3gal6	8.59299e-125	-0.982866	0.343	0.904	1.31645e-120
Xdh	3.65523e-124	0.486035	0.303	0	5.59981e-120
Smap2	3.89005e-124	-0.797555	0.646	0.968	5.95955e-120
Txn1	2.75263e-123	0.95864	0.796	0.399	4.21703e-119
Ccr5	4.83833e-123	-1.01347	0.376	0.921	7.41232e-119
Malat1	6.46033e-123	-0.502943	0.978	1	9.89723e-119
Ivns1abp	5.21835e-122	-0.926892	0.482	0.932	7.9945e-118
Gm6377	6.9713e-122	0.611331	0.325	0.002	1.068e-117
Pglyrp1	3.77344e-121	1.25428	0.336	0.006	5.7809e-117
Ckb	5.09725e-120	-0.739776	0.69	0.981	7.80899e-116
Ucp2	7.04665e-120	0.797879	0.927	0.853	1.07955e-115
Nxpe4	8.65238e-120	0.514591	0.303	0.001	1.32555e-115
Clec4e	1.11204e-119	0.843881	0.296	0.001	1.70365e-115
Treml4	1.48129e-119	1.09087	0.314	0.002	2.26934e-115
Timp2	1.98691e-119	-0.768062	0.485	0.955	3.04395e-115
Bcl2a1d	2.49653e-119	0.85864	0.496	0.047	3.82468e-115
Sall1	3.69555e-119	-0.961881	0.212	0.844	5.66159e-115
Kctd12	7.73172e-119	-0.898548	0.745	0.986	1.1845e-114
Cd9	1.55821e-118	-0.40908	0.755	0.996	2.38718e-114
Krt80	4.89548e-118	0.548207	0.299	0.001	7.49988e-114
Rnase6	2.37365e-116	0.926957	0.646	0.154	3.63643e-112
Il2rg	4.98821e-116	0.677893	0.42	0.019	7.64193e-112
Fscn1	9.7864e-116	-1.00598	0.226	0.842	1.49928e-111
Ldlrad3	1.84488e-115	0.502608	0.31	0.002	2.82636e-111
Cyfip1	2.68427e-115	-0.731014	0.715	0.972	4.1123e-111
Cttnbp2nl	6.0114e-115	-0.984043	0.321	0.886	9.20946e-111
Cd36	1.97642e-114	0.963699	0.296	0.001	3.02787e-110
Unc93b1	2.44763e-112	-0.692921	0.854	0.993	3.74977e-108
Tnip3	9.47444e-112	0.99298	0.277	0.001	1.45148e-107
Rps27a	3.42777e-111	0.652427	0.996	0.996	5.25135e-107
Taldo1	7.40911e-111	0.788707	0.891	0.763	1.13508e-106
Rpl18	8.14121e-111	0.657926	0.985	0.987	1.24723e-106
Pilrb2	2.01798e-109	0.623119	0.299	0.002	3.09154e-105
Rps11	2.40821e-109	0.657111	0.996	0.995	3.68938e-105
Runx3	2.97943e-109	0.467802	0.281	0.001	4.56448e-105
Gsn	3.5222e-109	0.667581	0.427	0.024	5.39601e-105
Ophn1	4.24682e-109	-0.982243	0.219	0.823	6.50613e-105
Rhoh	5.95154e-109	-1.04112	0.314	0.867	9.11777e-105
Nr4a1	2.16718e-108	1.48462	0.715	0.26	3.32013e-104
Il1b	3.19999e-108	2.26944	0.602	0.094	4.90238e-104
Fam102b	7.76981e-108	-0.97201	0.303	0.856	1.19033e-103
Cyfip2	9.25179e-108	0.669185	0.281	0.001	1.41737e-103
Ifi204	5.91834e-107	0.852718	0.391	0.02	9.0669e-103
Rpl38	8.14561e-107	0.735875	0.982	0.95	1.24791e-102
Tspo	9.48817e-107	0.833191	0.763	0.485	1.45359e-102
Cyth4	1.98335e-106	-0.689259	0.807	0.985	3.0385e-102
Rps2	2.74473e-106	0.642734	0.96	0.971	4.20492e-102
Rps18	9.44331e-106	0.685939	0.982	0.975	1.44671e-101
Pde3b	1.19778e-105	-0.925808	0.299	0.856	1.835e-101
Lst1	1.49238e-105	0.972724	0.759	0.698	2.28632e-101
Rrbp1	1.17881e-104	-0.616684	0.858	0.992	1.80594e-100
Plaur	2.44782e-104	0.994188	0.489	0.099	3.75007e-100
Grn	5.49617e-104	-0.62529	0.814	0.985	8.42014e-100
Ltb4r1	6.00447e-104	0.480589	0.303	0.003	9.19884e-100
Arpc2	9.75086e-104	0.623902	0.967	0.95	1.49383e-99
Cd33	1.40269e-103	-0.933037	0.391	0.89	2.14892e-99
Atp1a3	4.32199e-103	0.64839	0.343	0.012	6.62128e-99
Tmsb4x	5.08548e-103	0.449765	1	1	7.79095e-99
Adap2	7.75208e-103	-0.887555	0.376	0.891	1.18762e-98
Nav3	1.37717e-102	-1.0802	0.15	0.749	2.10982e-98
Prdx5	3.22234e-102	0.842121	0.872	0.768	4.93662e-98
Rpl8	1.34301e-101	0.608834	0.974	0.983	2.05749e-97
Cd300e	1.84312e-101	1.07928	0.252	0.001	2.82366e-97
Prdx1	1.95519e-101	0.729476	0.909	0.78	2.99535e-97
Iqgap2	2.69486e-101	0.392119	0.285	0.002	4.12852e-97
Nedd9	7.64856e-101	0.532866	0.343	0.009	1.17176e-96
Capg	1.0293e-100	0.885008	0.5	0.162	1.57689e-96
Ctsf	4.97509e-100	-0.899351	0.226	0.813	7.62184e-96
Cfp	5.15602e-100	0.55405	0.31	0.005	7.89902e-96
Hexa	1.21289e-99	-0.66921	0.81	0.981	1.85815e-95
Rpl32	3.09879e-99	0.677422	0.989	0.99	4.74734e-95
Clec2d	4.07681e-99	0.948895	0.65	0.173	6.24567e-95
Rpl19	8.24308e-99	0.601048	0.996	0.996	1.26284e-94
Pfkp	1.90888e-98	0.467965	0.299	0.005	2.9244e-94
Vav3	7.09368e-98	0.378011	0.241	0	1.08675e-93
Fabp4	8.06848e-98	1.00426	0.23	0	1.23609e-93
Itgax	8.4675e-98	0.619339	0.38	0.022	1.29722e-93
Rps8	2.60708e-97	0.581227	0.967	0.994	3.99404e-93
Calm2	6.36157e-97	-0.602586	0.861	0.985	9.74592e-93
Gpi1	7.71621e-97	0.703881	0.832	0.58	1.18212e-92
Mef2a	1.05663e-96	-0.679672	0.777	0.982	1.61876e-92
Cd244	1.13903e-96	0.658435	0.383	0.018	1.74499e-92
Hip1	1.38745e-96	0.668374	0.391	0.022	2.12557e-92
Lair1	2.39102e-96	-0.635068	0.657	0.977	3.66304e-92
Atp8b4	3.92525e-96	0.359664	0.234	0	6.01349e-92
Ctsz	5.18999e-96	-0.362752	0.953	0.999	7.95107e-92
Fau	6.10441e-96	0.578385	1	0.998	9.35195e-92
Cd63	9.44564e-96	-0.0671862	0.391	0.892	1.44707e-91
Agpat4	9.83507e-96	0.743901	0.445	0.045	1.50673e-91
Ciita	1.27507e-95	0.462898	0.241	0.001	1.9534e-91
Fcgr1	3.60479e-95	-0.727593	0.496	0.927	5.52254e-91
Ybx1	5.2275e-95	0.650365	0.927	0.829	8.00854e-91
Rpl36	1.72834e-94	0.657069	0.982	0.959	2.64782e-90
Slamf7	2.9833e-94	0.555178	0.285	0.004	4.57041e-90
Tmem86a	4.40064e-94	-0.835148	0.347	0.87	6.74178e-90
Pmp22	1.15891e-93	-0.591211	0.347	0.888	1.77545e-89
Rps27	1.28286e-93	0.690469	0.989	0.986	1.96534e-89
Rps13	2.62505e-93	0.611984	0.993	0.991	4.02157e-89
Pirb	3.31935e-93	0.744605	0.558	0.125	5.08525e-89
2020-09-09	7.13761e-93	0.669016	0.409	0.039	1.09348e-88
Cebpb	1.49245e-92	1.19866	0.799	0.824	2.28644e-88
Rpl37a	1.50881e-92	0.618008	0.993	0.991	2.3115e-88
Rbm3	1.64805e-91	0.669568	0.821	0.665	2.52481e-87
Selenow	5.12597e-91	0.753299	0.712	0.317	7.85298e-87
Fam105a	6.20071e-91	-0.692914	0.748	0.965	9.49949e-87
Neat1	7.42045e-91	1.15658	0.781	0.354	1.13681e-86
Fcgr4	1.34702e-90	0.898951	0.365	0.092	2.06363e-86
Sox4	5.02755e-90	-1.22715	0.179	0.758	7.70221e-86
Pparg	4.42235e-89	0.549708	0.226	0.001	6.77504e-85
Cd300lb	6.15342e-89	0.428956	0.259	0.003	9.42704e-85
Comt	8.0333e-89	-0.732632	0.562	0.923	1.2307e-84
Arpc3	1.10889e-88	0.58841	0.953	0.907	1.69881e-84
Plp2	1.63017e-88	0.359008	0.23	0.001	2.49741e-84
Axl	2.90323e-88	0.564876	0.292	0.008	4.44775e-84
Tagln2	3.62235e-88	0.911726	0.599	0.309	5.54943e-84
Pkm	6.06798e-88	0.731194	0.872	0.702	9.29614e-84
Grk3	7.87022e-88	0.860232	0.588	0.238	1.20572e-83
Rps26	5.14643e-87	0.637548	0.967	0.941	7.88433e-83
Rpl41	6.58714e-87	0.599659	0.982	0.975	1.00915e-82
Rps28	9.43819e-87	0.66712	0.96	0.921	1.44593e-82
Saraf	1.38159e-86	-0.704817	0.584	0.925	2.1166e-82
Ehd1	1.65652e-86	0.57001	0.328	0.015	2.53778e-82
Bmp2k	5.27836e-86	-0.816645	0.467	0.891	8.08644e-82
Serf2	5.41617e-86	0.611943	0.974	0.932	8.29757e-82
Rpl9	6.30158e-86	0.562428	0.989	0.991	9.65401e-82
Dock4	9.34122e-86	-0.851384	0.38	0.851	1.43107e-81
Smad7	2.6927e-85	-0.979221	0.365	0.862	4.12522e-81
Gm5150	3.5006e-85	0.333495	0.201	0	5.36292e-81
B2m	1.13066e-84	0.639256	0.982	0.993	1.73217e-80
Itm2c	1.37702e-84	-0.645104	0.755	0.958	2.10959e-80
Trem3	1.38365e-84	0.628329	0.215	0.001	2.11975e-80
Rps24	1.60722e-84	0.58427	1	0.997	2.46226e-80
Gna15	1.63315e-84	-0.803765	0.35	0.818	2.50198e-80
Mgl2	1.74986e-84	1.37722	0.226	0.002	2.68079e-80
Pitpna	2.11547e-84	0.650777	0.799	0.602	3.2409e-80
H2-Q7	3.96275e-84	0.714754	0.449	0.068	6.07093e-80
Rapgef5	7.83995e-84	-0.837904	0.201	0.748	1.20108e-79
Sirpb1b	1.30394e-83	0.280164	0.197	0	1.99764e-79
Tmem173	2.74318e-83	-0.79541	0.383	0.844	4.20255e-79
Ptger4	4.58049e-83	0.475844	0.263	0.005	7.01731e-79
Itga6	1.47068e-82	-0.798855	0.234	0.783	2.25308e-78
Rps14	2.00974e-82	0.590287	0.993	0.992	3.07892e-78
Pla2g15	4.35609e-82	-0.738336	0.325	0.836	6.67352e-78
Daglb	7.23408e-82	-0.815088	0.365	0.824	1.10826e-77
Csf2ra	8.19472e-82	0.761015	0.785	0.432	1.25543e-77
Pag1	1.26172e-81	-0.773666	0.522	0.913	1.93296e-77
Pros1	2.50372e-81	-0.732713	0.321	0.822	3.83569e-77
F13a1	3.47664e-81	0.90716	0.219	0.002	5.32622e-77
Clec2i	4.68501e-81	0.375197	0.237	0.002	7.17743e-77
Pstpip1	4.93406e-81	0.406607	0.339	0.018	7.55898e-77
Sirpa	5.47018e-81	-0.513399	0.839	0.988	8.38032e-77
Fchsd2	1.26745e-80	-0.863032	0.252	0.779	1.94173e-76
Pdlim1	1.38901e-80	0.305456	0.197	0	2.12796e-76
Sema4a	2.41685e-80	0.445637	0.347	0.019	3.70262e-76
Lag3	2.49579e-80	-0.799573	0.255	0.797	3.82355e-76
Rpl23	4.35379e-80	0.572934	0.996	0.995	6.67e-76
Frmd4b	5.30311e-80	-0.755666	0.336	0.833	8.12436e-76
Csmd3	6.44772e-80	-0.8714	0.084	0.627	9.87791e-76
Hsp90b1	1.45794e-79	-0.589726	0.858	0.985	2.23356e-75
Rac2	2.61622e-79	0.698094	0.818	0.641	4.00805e-75
AI839979	2.64786e-79	0.382172	0.201	0	4.05653e-75
Gm36161	3.33604e-79	0.345736	0.193	0	5.11082e-75
Tmem59	4.45288e-79	-0.548167	0.792	0.97	6.82181e-75
Olfm1	5.21279e-79	0.462184	0.248	0.004	7.986e-75
Gm15987	6.56851e-79	0.306102	0.186	0	1.00629e-74
Samd9l	7.11374e-79	0.392151	0.285	0.008	1.08982e-74
Rpl28	8.62871e-79	0.575998	0.978	0.987	1.32192e-74
Rps7	1.6019e-78	0.604192	0.993	0.986	2.45411e-74
Elmo1	1.99285e-78	-0.789785	0.544	0.888	3.05304e-74
Irf7	2.13676e-78	0.660481	0.292	0.013	3.27352e-74
Rps15a	2.54341e-78	0.578058	0.993	0.99	3.8965e-74
Clec4b1	3.24456e-78	0.548071	0.212	0.001	4.97066e-74
Slc16a6	6.87481e-78	-0.812174	0.259	0.754	1.05322e-73
Pilrb1	7.98579e-78	0.398454	0.212	0.001	1.22342e-73
Fgd2	9.70357e-78	-0.80026	0.412	0.839	1.48659e-73
Ccl6	1.10158e-77	0.844199	0.737	0.521	1.68761e-73
Cxxc5	1.77419e-77	-0.807389	0.23	0.748	2.71806e-73
Slc2a6	1.90491e-77	0.378007	0.234	0.003	2.91833e-73
Lrrc8c	6.55418e-77	0.426718	0.27	0.008	1.0041e-72
Psmb8	1.10721e-76	0.586362	0.891	0.802	1.69625e-72
Pfn1	1.27498e-76	0.56461	0.982	0.983	1.95326e-72
Ly6i	1.28854e-76	0.594959	0.204	0.001	1.97405e-72
Nrip1	1.40155e-76	-0.798528	0.478	0.883	2.14717e-72
Slfn5	2.19705e-76	0.624649	0.296	0.014	3.36587e-72
Dpp4	3.68532e-76	0.274465	0.193	0	5.64591e-72
Rpl34	4.67096e-76	0.552152	0.993	0.988	7.15591e-72
Lrba	4.88637e-76	-0.821554	0.204	0.721	7.48591e-72
Rgs18	7.07244e-76	0.205415	0.19	0	1.0835e-71
F10	7.26976e-76	0.37381	0.19	0	1.11373e-71
S1pr5	8.77203e-76	0.49251	0.179	0	1.34387e-71
L1cam	8.93358e-76	0.373106	0.204	0.001	1.36862e-71
Irf8	1.34337e-75	-0.661472	0.657	0.954	2.05804e-71
Hopx	1.48426e-75	0.377292	0.219	0.002	2.27389e-71
Clec10a	1.6463e-75	0.426673	0.197	0.001	2.52214e-71
Actb	1.91732e-75	0.519313	1	1	2.93733e-71
Atox1	4.55415e-75	0.639866	0.905	0.776	6.97695e-71
Ptma	5.37804e-75	0.640636	0.982	0.969	8.23916e-71
Mylip	8.35402e-75	-0.784369	0.318	0.814	1.27984e-70
Ly6c2	8.86219e-75	1.17772	0.19	0.001	1.35769e-70
Stxbp6	1.58457e-74	0.268004	0.212	0.002	2.42756e-70
F630028O10Rik	1.69743e-74	0.36665	0.215	0.002	2.60047e-70
Pltp	2.55793e-74	0.66823	0.245	0.006	3.91874e-70
Arhgdib	2.88039e-74	0.613867	0.887	0.861	4.41276e-70
Rab3il1	3.94138e-74	-0.74665	0.307	0.808	6.03819e-70
Chil3	4.58427e-74	1.44656	0.186	0	7.0231e-70
Nfe2	5.823e-74	0.311861	0.193	0.001	8.92083e-70
Glipr1	1.4109e-73	0.634656	0.442	0.079	2.1615e-69
Clec4a3	1.54004e-73	0.748295	0.693	0.562	2.35934e-69
Rtn4rl1	1.5447e-73	-0.775173	0.131	0.637	2.36648e-69
Tcn2	1.66331e-73	-0.705208	0.5	0.857	2.54819e-69
Sft2d1	2.09105e-73	-0.744882	0.496	0.85	3.20349e-69
Sp100	2.33854e-73	0.657325	0.453	0.088	3.58264e-69
Numb	2.47677e-73	-0.794175	0.27	0.755	3.79441e-69
Tiam2	3.21062e-73	0.335672	0.204	0.002	4.91867e-69
Prr13	4.6348e-73	0.776554	0.712	0.486	7.10051e-69
Gm9733	6.64628e-73	0.507251	0.182	0	1.01821e-68
Rpl13	9.24517e-73	0.549156	1	0.998	1.41636e-68
Mgat4a	1.17951e-72	-0.763314	0.292	0.781	1.807e-68
Usp2	1.19193e-72	-0.798567	0.153	0.681	1.82603e-68
Ldlr	1.77116e-72	0.414365	0.266	0.009	2.71342e-68
St3gal1	2.87412e-72	0.459945	0.288	0.013	4.40316e-68
Plekhg3	7.31745e-72	0.220527	0.186	0.001	1.12103e-67
Arpc5	8.61626e-72	0.623519	0.876	0.698	1.32001e-67
Stx11	1.11749e-71	0.286632	0.201	0.001	1.71199e-67
Slc29a3	2.49504e-71	-0.707517	0.438	0.863	3.8224e-67
Zyx	6.28597e-71	0.637213	0.591	0.293	9.63011e-67
Sh2d1b1	1.00839e-70	0.498947	0.299	0.019	1.54486e-66
Rras	1.91014e-70	0.684558	0.522	0.187	2.92634e-66
Fn1	3.92114e-70	1.24463	0.201	0.004	6.00719e-66
Adssl1	6.20156e-70	0.636877	0.482	0.116	9.50079e-66
Slc1a3	7.27079e-70	-0.776478	0.142	0.662	1.11388e-65
Skint3	7.55623e-70	0.473687	0.27	0.012	1.15761e-65
Rpl35	1.04361e-69	0.569575	0.956	0.92	1.59881e-65
Tpt1	2.31958e-69	0.510152	1	0.998	3.5536e-65
Diaph1	2.60372e-69	0.648012	0.566	0.146	3.98891e-65
Rpl10a	2.79026e-69	0.538468	0.974	0.975	4.27469e-65
1700017B05Rik	3.07045e-69	-0.782313	0.248	0.724	4.70394e-65
Inpp5d	3.87222e-69	-0.664644	0.65	0.92	5.93224e-65
Ifi209	4.50348e-69	0.588345	0.321	0.028	6.89933e-65
Ftl1	9.57148e-69	0.621277	1	0.998	1.46635e-64
Slc7a8	1.38171e-68	-0.716409	0.255	0.734	2.11678e-64
Gngt2	1.71057e-68	0.956936	0.807	0.815	2.6206e-64
Man1a2	1.80198e-68	-0.758543	0.416	0.829	2.76063e-64
Pira2	2.4669e-68	0.232352	0.219	0.004	3.77929e-64
Myl12b	2.52857e-68	0.608132	0.876	0.81	3.87377e-64
Mapkapk2	2.70564e-68	0.71264	0.682	0.359	4.14504e-64
Glud1	4.54795e-68	0.639509	0.745	0.501	6.96746e-64
Dusp5	1.59055e-67	0.581836	0.259	0.015	2.43672e-63
Fam49a	2.4327e-67	0.713589	0.453	0.106	3.7269e-63
Bsg	6.8754e-67	-0.37011	0.763	0.958	1.05331e-62
Trf	9.06566e-67	-0.577911	0.679	0.957	1.38886e-62
Acp5	9.44137e-67	0.347821	0.175	0.001	1.44642e-62
Atp6v0b	1.43628e-66	-0.452992	0.872	0.99	2.20039e-62
Lmo1	1.51991e-66	0.307466	0.164	0	2.32851e-62
Fez2	1.58061e-66	-0.695829	0.285	0.757	2.42149e-62
Xylt1	1.74052e-66	0.300448	0.245	0.008	2.66648e-62
Plekho2	4.06968e-66	0.673465	0.573	0.173	6.23475e-62
Gas7	5.09136e-66	0.253714	0.197	0.002	7.79996e-62
Ywhah	1.67671e-65	-0.531025	0.781	0.963	2.56872e-61
Sik1	4.12253e-65	0.447148	0.292	0.018	6.31571e-61
Dst	5.20432e-65	-0.765891	0.288	0.764	7.97302e-61
Csnk1e	5.20473e-65	-0.665583	0.471	0.859	7.97365e-61
Rpl15	5.46078e-65	0.49139	0.974	0.981	8.36592e-61
Ctc1	6.44619e-65	-0.728702	0.19	0.662	9.87557e-61
Ryr1	1.63933e-64	0.261578	0.175	0.001	2.51145e-60
Slc40a1	1.90409e-64	-0.78024	0.12	0.61	2.91706e-60
Col27a1	2.13259e-64	-0.735363	0.135	0.616	3.26712e-60
Dna2	2.59394e-64	0.291735	0.263	0.011	3.97391e-60
Snx18	2.98216e-64	-0.706125	0.456	0.841	4.56866e-60
Klk8	3.22597e-64	-0.693389	0.223	0.717	4.94218e-60
Susd3	6.55644e-64	-0.677991	0.573	0.871	1.00445e-59
Sgk1	1.15491e-63	-0.969554	0.412	0.826	1.76931e-59
H2afj	1.15656e-63	0.653034	0.664	0.378	1.77185e-59
Cd209a	1.47807e-63	1.17418	0.164	0.001	2.2644e-59
Fth1	2.02282e-63	0.689292	0.993	0.999	3.09896e-59
Tpd52	4.55401e-63	0.612772	0.73	0.541	6.97674e-59
Cd300lg	5.86508e-63	0.211174	0.164	0.001	8.98531e-59
Ang	6.81279e-63	-0.719681	0.281	0.752	1.04372e-58
Sgce	7.22949e-63	-0.656203	0.117	0.608	1.10756e-58
Tjp1	7.58051e-63	-0.719242	0.135	0.619	1.16133e-58
Rnf13	2.29078e-62	-0.601706	0.602	0.896	3.50947e-58
Slfn1	2.87478e-62	0.37266	0.157	0	4.40416e-58
Ifi211	4.55422e-62	0.267489	0.157	0	6.97706e-58
Hpse	6.30021e-62	0.213599	0.161	0.001	9.65192e-58
Smpdl3b	1.16178e-61	0.615205	0.318	0.098	1.77985e-57
Stk17b	1.80598e-61	0.670579	0.628	0.319	2.76676e-57
Pqlc3	2.60249e-61	0.243688	0.245	0.01	3.98701e-57
Commd8	5.47153e-61	-0.651837	0.566	0.862	8.38238e-57
Dpep2	8.5327e-61	0.292504	0.164	0.001	1.30721e-56
Abca9	9.07294e-61	-0.768426	0.314	0.753	1.38997e-56
Eif3f	1.02072e-60	0.54318	0.894	0.818	1.56375e-56
Dbi	1.92599e-60	0.619882	0.719	0.48	2.95062e-56
Plec	2.0244e-60	0.375709	0.274	0.017	3.10138e-56
Runx2	2.5258e-60	0.333619	0.168	0.001	3.86953e-56
4930523C07Rik	7.91648e-60	0.400654	0.259	0.016	1.21281e-55
Pi16	1.71257e-59	0.231529	0.153	0	2.62366e-55
Jmjd1c	1.81427e-59	-0.679989	0.529	0.864	2.77946e-55
Tmcc3	2.61205e-59	-0.709812	0.354	0.791	4.00166e-55
Atp1a1	2.90376e-59	0.68505	0.697	0.477	4.44856e-55
Ifngr1	4.806e-59	-0.402902	0.923	0.991	7.36278e-55
Abi3	7.52507e-59	-0.544548	0.635	0.93	1.15284e-54
Pmaip1	8.98666e-59	0.743489	0.354	0.062	1.37676e-54
Thrsp	9.22626e-59	-0.664492	0.084	0.554	1.41346e-54
Gtf2h2	9.37341e-59	-0.694748	0.274	0.698	1.43601e-54
H2-DMb1	1.04736e-58	0.543773	0.584	0.674	1.60455e-54
Eef1a1	1.06181e-58	0.423257	0.996	0.999	1.62669e-54
Ccnd3	2.518e-58	0.617184	0.526	0.218	3.85758e-54
Ppp1r9a	3.09355e-58	-0.715594	0.153	0.621	4.73932e-54
Gm34084	4.61134e-58	0.332385	0.212	0.007	7.06458e-54
Ppcdc	4.90302e-58	-0.681118	0.248	0.703	7.51143e-54
Stab1	4.92352e-58	-0.475948	0.277	0.754	7.54284e-54
Ms4a7	5.44949e-58	0.996356	0.179	0.004	8.34862e-54
Rbms1	7.03021e-58	0.586876	0.562	0.164	1.07703e-53
Btf3	1.16298e-57	0.447249	0.927	0.907	1.78168e-53
Ccnd2	1.64686e-57	0.356505	0.204	0.006	2.52299e-53
Rpl35a	1.75714e-57	0.452849	0.996	0.994	2.69195e-53
Dock5	2.68719e-57	0.237163	0.142	0	4.11677e-53
Ass1	3.24981e-57	0.237994	0.153	0.001	4.97871e-53
Myo5a	3.66872e-57	0.417335	0.325	0.032	5.62048e-53
Gpr183	4.4036e-57	-0.749454	0.427	0.837	6.74631e-53
Psma7	5.97651e-57	0.565525	0.865	0.695	9.15601e-53
Atp5l	1.09844e-56	0.55021	0.898	0.75	1.68281e-52
Rplp2	3.51711e-56	0.477461	0.985	0.984	5.38821e-52
Cdc42ep2	3.70775e-56	0.361684	0.186	0.004	5.68028e-52
Picalm	5.26841e-56	-0.60761	0.803	0.965	8.07121e-52
Txnip	7.01294e-56	-0.795598	0.697	0.946	1.07438e-51
Jaml	8.65645e-56	0.189087	0.139	0	1.32617e-51
Myof	9.00023e-56	0.195687	0.15	0.001	1.37883e-51
Gstm1	9.71311e-56	0.520043	0.292	0.047	1.48805e-51
Cdkn1a	1.13647e-55	0.852195	0.423	0.082	1.74107e-51
B4galnt1	1.8475e-55	0.691607	0.489	0.17	2.83036e-51
Shtn1	1.95076e-55	0.282469	0.204	0.006	2.98856e-51
Rps10	3.15874e-55	0.458579	0.996	0.995	4.83919e-51
Gch1	3.25747e-55	0.408462	0.314	0.036	4.99045e-51
Dusp16	4.07926e-55	0.629573	0.361	0.167	6.24943e-51
Thbd	4.90989e-55	0.336625	0.139	0	7.52195e-51
Ahr	6.67227e-55	0.313386	0.186	0.004	1.02219e-50
Rps20	8.38873e-55	0.491874	0.996	0.992	1.28515e-50
Rasgrp4	1.00838e-54	0.417068	0.303	0.029	1.54484e-50
Rpl24	1.22868e-54	0.491562	0.974	0.967	1.88234e-50
Adora3	1.37613e-54	-0.668373	0.142	0.587	2.10823e-50
Mob3b	1.89882e-54	0.265574	0.201	0.006	2.909e-50
Plxnd1	2.49129e-54	0.170646	0.146	0.001	3.81665e-50
Ntpcr	2.55486e-54	-0.642905	0.387	0.784	3.91405e-50
Rasgrp1	3.67186e-54	0.233561	0.146	0.001	5.62529e-50
Rps3a1	6.29508e-54	0.448599	0.993	0.996	9.64406e-50
St3gal4	7.86579e-54	0.466536	0.409	0.079	1.20504e-49
Pdia3	8.62137e-54	-0.454688	0.858	0.979	1.32079e-49
Rab11fip1	1.01121e-53	0.188732	0.142	0.001	1.54918e-49
Ski	1.35603e-53	-0.635239	0.376	0.78	2.07743e-49
Pwwp2a	1.63525e-53	-0.678095	0.288	0.698	2.50521e-49
Glipr2	1.93284e-53	0.205506	0.161	0.002	2.96112e-49
H2afz	2.23648e-53	0.597029	0.898	0.864	3.42629e-49
Zbtb16	2.97427e-53	0.222021	0.139	0	4.55658e-49
Hspa8	5.07171e-53	0.526495	0.96	0.982	7.76986e-49
Lrrc3	7.14874e-53	-0.584834	0.124	0.574	1.09519e-48
Rpl11	9.08485e-53	0.433604	0.989	0.993	1.3918e-48
Eef2k	1.63359e-52	-0.62344	0.128	0.563	2.50265e-48
Camk2n1	2.92235e-52	-0.68639	0.208	0.653	4.47705e-48
Rasgrp3	2.9445e-52	-0.565345	0.266	0.714	4.51098e-48
Lilra6	2.9852e-52	0.160733	0.142	0.001	4.57332e-48
Sell	4.17097e-52	0.322692	0.135	0	6.38992e-48
Ifi47	6.97378e-52	0.389035	0.197	0.007	1.06838e-47
Pygl	8.22751e-52	0.496739	0.325	0.058	1.26046e-47
AC149090.1	8.26658e-52	-0.582835	0.558	0.874	1.26644e-47
Sub1	1.16535e-51	0.533748	0.803	0.699	1.78531e-47
Fpr2	1.46421e-51	0.322529	0.128	0	2.24317e-47
Limd1	1.97473e-51	0.447414	0.423	0.082	3.02529e-47
Eif3k	2.72649e-51	0.512666	0.839	0.689	4.17698e-47
Eif5a	3.48276e-51	0.521507	0.898	0.792	5.33559e-47
Gpr18	4.03269e-51	0.180405	0.164	0.003	6.17808e-47
Grap2	4.96444e-51	0.1391	0.12	0	7.60551e-47
Ptgir	4.96444e-51	0.174136	0.12	0	7.60551e-47
Rab7b	1.01283e-50	0.19633	0.135	0.001	1.55166e-46
Pilra	1.02953e-50	0.650455	0.438	0.208	1.57724e-46
Nr4a2	1.07901e-50	0.530154	0.161	0.003	1.65305e-46
Atraid	1.09113e-50	-0.576059	0.482	0.812	1.67161e-46
Rpl7	1.63862e-50	0.428108	0.967	0.985	2.51037e-46
Ulk2	3.38405e-50	-0.628053	0.168	0.575	5.18437e-46
Heg1	3.50335e-50	0.322971	0.204	0.009	5.36713e-46
Lrrk2	4.95453e-50	0.175697	0.135	0.001	7.59034e-46
Oxct1	6.11901e-50	-0.615384	0.372	0.762	9.37433e-46
Dnase1l1	1.39284e-49	0.338511	0.292	0.03	2.13383e-45
Prdx6	1.93097e-49	0.625758	0.558	0.252	2.95825e-45
Itgam	1.93499e-49	-0.464303	0.726	0.94	2.96441e-45
Gmfg	2.0288e-49	0.572417	0.759	0.6	3.10812e-45
Tpst2	2.17153e-49	-0.572892	0.46	0.797	3.32678e-45
Bcl2a1b	3.14889e-49	0.551037	0.682	0.699	4.8241e-45
Naca	4.00006e-49	0.430009	0.945	0.945	6.12808e-45
Snrnp70	4.17217e-49	-0.573278	0.664	0.906	6.39176e-45
Nabp1	6.49083e-49	0.553953	0.365	0.076	9.94395e-45
Rpl18a	7.08766e-49	0.433504	1	0.996	1.08583e-44
Fosl2	9.34088e-49	0.514488	0.343	0.069	1.43102e-44
Whrn	1.18347e-48	-0.592439	0.099	0.514	1.81307e-44
Canx	1.25504e-48	-0.521928	0.734	0.924	1.92273e-44
Pnp	1.4777e-48	-0.487758	0.668	0.917	2.26383e-44
Abca1	1.69762e-48	-0.568463	0.281	0.72	2.60076e-44
Thbs1	1.82847e-48	1.10757	0.139	0.03	2.80122e-44
Cd34	1.86386e-48	-0.670441	0.175	0.603	2.85543e-44
Tmem37	2.65316e-48	-0.560674	0.23	0.667	4.06463e-44
Stom	2.65565e-48	0.290308	0.288	0.03	4.06845e-44
Eif1	2.84185e-48	0.400253	0.974	0.99	4.35372e-44
Eps8	2.84972e-48	0.457712	0.318	0.047	4.36577e-44
Herc2	3.19578e-48	-0.58924	0.369	0.752	4.89594e-44
Clic4	5.98678e-48	0.495546	0.303	0.039	9.17175e-44
Tbxas1	6.6076e-48	-0.592047	0.383	0.756	1.01228e-43
Sec61b	8.89008e-48	0.506663	0.825	0.687	1.36196e-43
Gns	8.99169e-48	-0.518439	0.558	0.871	1.37753e-43
Bcl3	1.62444e-47	0.380855	0.223	0.015	2.48865e-43
Rps9	1.69294e-47	0.401848	0.974	0.997	2.59359e-43
0610040J01Rik	1.71307e-47	-0.549023	0.128	0.538	2.62442e-43
Dip2b	2.27581e-47	-0.582073	0.263	0.663	3.48654e-43
Upk1b	2.58289e-47	-0.644714	0.069	0.467	3.95698e-43
Nfkbiz	3.21239e-47	0.92253	0.62	0.298	4.92138e-43
Cd93	6.22946e-47	0.269405	0.128	0.001	9.54353e-43
Retreg1	6.85531e-47	-0.567809	0.504	0.836	1.05023e-42
Ssh2	8.46554e-47	-0.622214	0.73	0.932	1.29692e-42
Snx5	9.00765e-47	-0.469996	0.686	0.925	1.37997e-42
Jam2	1.14986e-46	-0.549099	0.08	0.475	1.76158e-42
Gm28875	1.94855e-46	0.154784	0.109	0	2.98518e-42
Cd177	1.94855e-46	0.189723	0.109	0	2.98518e-42
Ptpn7	2.66835e-46	0.144996	0.128	0.001	4.08792e-42
Tppp3	2.96979e-46	0.400568	0.15	0.003	4.54972e-42
Rpl22	3.49708e-46	0.44242	0.953	0.962	5.35753e-42
Rpl6	4.60789e-46	0.412449	0.996	0.991	7.05929e-42
Ncf4	5.31356e-46	0.588846	0.664	0.452	8.14038e-42
Edem2	6.25873e-46	-0.562312	0.401	0.718	9.58838e-42
Stk10	7.98931e-46	0.590798	0.551	0.395	1.22396e-41
Lrrfip1	1.21936e-45	0.604236	0.723	0.486	1.86806e-41
Rps3	1.22259e-45	0.395094	0.985	0.993	1.873e-41
Lpl	1.48956e-45	0.838555	0.241	0.038	2.282e-41
Cd14	1.97538e-45	0.209488	0.544	0.853	3.02629e-41
Rps15	3.67032e-45	0.430494	0.945	0.966	5.62293e-41
H2-DMa	4.52251e-45	0.474377	0.653	0.744	6.92849e-41
Tmcc1	4.6129e-45	0.662262	0.642	0.363	7.06696e-41
Rpl17	5.9036e-45	0.454795	0.989	0.99	9.04431e-41
Akirin2	7.05159e-45	-0.564101	0.445	0.78	1.0803e-40
Zfp652	9.74519e-45	-0.617033	0.328	0.687	1.49296e-40
Man2b1	9.8132e-45	-0.42967	0.869	0.975	1.50338e-40
Rpl26	1.2162e-44	0.426574	0.993	0.992	1.86322e-40
Nap1l1	1.37891e-44	0.562738	0.664	0.336	2.11248e-40
Rpl7a	1.65929e-44	0.421494	0.96	0.968	2.54202e-40
Cebpa	1.66967e-44	-0.710623	0.434	0.776	2.55794e-40
Dgkg	2.09164e-44	0.214427	0.139	0.002	3.20439e-40
Lpcat3	2.67744e-44	-0.572372	0.27	0.666	4.10184e-40
Mtus1	2.9543e-44	-0.578581	0.328	0.719	4.52599e-40
Rpl4	3.04271e-44	0.422218	0.927	0.921	4.66144e-40
Xist	3.14319e-44	-0.551672	0.865	0.98	4.81537e-40
Slc25a24	3.42009e-44	0.123499	0.113	0	5.23958e-40
Clec4n	4.37205e-44	0.237213	0.128	0.001	6.69798e-40
Bcl2	4.40736e-44	0.524172	0.376	0.095	6.75208e-40
Oasl2	4.44615e-44	0.315914	0.193	0.011	6.8115e-40
Rpl27a	5.03786e-44	0.391508	0.996	0.997	7.71801e-40
Gas6	5.0605e-44	-0.520303	0.201	0.621	7.75268e-40
Myl12a	5.13813e-44	0.52513	0.828	0.606	7.87161e-40
Cxcl16	5.70905e-44	0.488446	0.416	0.389	8.74627e-40
Dram1	6.52386e-44	0.150787	0.12	0.001	9.99456e-40
Mefv	6.82246e-44	0.180884	0.113	0	1.0452e-39
Oas3	6.96999e-44	0.195521	0.113	0	1.0678e-39
Capn2	7.53001e-44	0.337228	0.292	0.039	1.1536e-39
Atp8a2	7.99215e-44	-0.517333	0.128	0.535	1.2244e-39
Bhlhe41	9.41769e-44	-0.563532	0.223	0.645	1.44279e-39
Sall3	1.16088e-43	-0.628594	0.106	0.482	1.77847e-39
Tspan3	1.2554e-43	-0.563075	0.277	0.65	1.92327e-39
Cdk2ap2	1.60345e-43	0.59418	0.701	0.508	2.45648e-39
Gpr65	1.88402e-43	0.441687	0.266	0.037	2.88632e-39
Mbp	2.35708e-43	0.552008	0.42	0.134	3.61105e-39
Fabp5	3.02605e-43	0.481794	0.215	0.023	4.63591e-39
Map4k1	3.05289e-43	0.181051	0.153	0.004	4.67702e-39
Atp5e	3.26282e-43	0.475583	0.92	0.817	4.99864e-39
P2ry6	3.44796e-43	-0.608295	0.478	0.808	5.28228e-39
Rpl14	4.09357e-43	0.438041	0.949	0.96	6.27135e-39
Abhd6	4.61559e-43	-0.558986	0.142	0.536	7.07108e-39
Il21r	5.44595e-43	-0.498287	0.288	0.694	8.34319e-39
Arhgap45	5.97135e-43	-0.536508	0.719	0.913	9.14811e-39
Degs1	6.71909e-43	0.554721	0.62	0.342	1.02937e-38
Fam212a	6.84929e-43	-0.548149	0.113	0.505	1.04931e-38
Tmem100	6.92965e-43	-0.540349	0.091	0.468	1.06162e-38
Bcl6	7.44066e-43	0.447434	0.347	0.07	1.13991e-38
St8sia4	8.90103e-43	0.564127	0.391	0.103	1.36364e-38
Tpp1	1.00129e-42	-0.575783	0.456	0.775	1.53398e-38
Atp5h	1.39101e-42	0.456274	0.909	0.812	2.13102e-38
Clta	1.82531e-42	-0.349823	0.923	0.986	2.79637e-38
Sri	1.90916e-42	0.500436	0.697	0.464	2.92484e-38
Slpi	2.03383e-42	0.238623	0.117	0.001	3.11582e-38
Cyp4f16	2.50519e-42	0.375077	0.288	0.046	3.83795e-38
Ints6l	2.93027e-42	-0.611069	0.237	0.616	4.48918e-38
Serinc1	3.19266e-42	-0.511387	0.606	0.863	4.89115e-38
Fam129a	3.55821e-42	0.526153	0.526	0.197	5.45118e-38
Klf4	4.51435e-42	0.663733	0.558	0.181	6.91599e-38
Specc1	5.04112e-42	-0.581455	0.285	0.665	7.723e-38
Rps6	5.2158e-42	0.434227	0.967	0.966	7.9906e-38
Snn	5.28549e-42	-0.526205	0.128	0.52	8.09737e-38
Plod1	5.77128e-42	-0.555995	0.19	0.582	8.84161e-38
Ppfia4	6.72846e-42	-0.543286	0.518	0.785	1.0308e-37
Phf14	7.99364e-42	-0.579173	0.383	0.727	1.22463e-37
Rpl39	8.36645e-42	0.455175	0.996	0.99	1.28174e-37
Rftn1	8.49025e-42	0.373259	0.321	0.052	1.30071e-37
Plxnc1	1.29269e-41	0.172899	0.135	0.002	1.9804e-37
Gspt1	1.40517e-41	-0.538803	0.394	0.749	2.15271e-37
Stx3	1.96591e-41	0.197625	0.182	0.009	3.01177e-37
Phgdh	1.98999e-41	-0.531963	0.197	0.602	3.04867e-37
Grap	3.07138e-41	-0.556488	0.172	0.555	4.70536e-37
Nostrin	3.73247e-41	0.127949	0.128	0.002	5.71815e-37
Gm10076	3.75491e-41	0.450527	0.818	0.697	5.75253e-37
Tmbim6	3.9729e-41	-0.367128	0.92	0.982	6.08648e-37
Rps25	4.70606e-41	0.390579	0.967	0.971	7.20968e-37
4833407H14Rik	5.02001e-41	0.220473	0.106	0	7.69066e-37
Eef2	5.49346e-41	0.401784	0.923	0.93	8.41598e-37
Khdrbs3	6.10669e-41	-0.46669	0.102	0.487	9.35544e-37
Ms4a4b	6.24249e-41	0.150902	0.106	0	9.56349e-37
Abracl	7.03219e-41	0.499737	0.715	0.48	1.07733e-36
Eif3h	8.48942e-41	0.450512	0.854	0.751	1.30058e-36
Hmgb2	9.2939e-41	0.650879	0.682	0.424	1.42383e-36
Phf11b	9.43338e-41	0.487052	0.372	0.119	1.44519e-36
Cox6b1	1.16995e-40	0.441292	0.883	0.763	1.79236e-36
Rilpl1	1.19344e-40	-0.515793	0.124	0.5	1.82835e-36
Sirpb1a	1.20126e-40	0.130695	0.102	0	1.84033e-36
Ppp1r14b	1.29562e-40	-0.50015	0.507	0.797	1.98489e-36
Rpl10	1.56275e-40	0.379184	0.985	0.994	2.39414e-36
Rnd3	1.96548e-40	0.180758	0.109	0.001	3.01112e-36
P4ha1	2.04315e-40	-0.515497	0.434	0.794	3.1301e-36
AW112010	3.0608e-40	0.6054	0.423	0.207	4.68915e-36
Igsf6	3.1827e-40	0.584363	0.65	0.333	4.8759e-36
Capn3	4.67608e-40	-0.499493	0.128	0.514	7.16375e-36
Rab14	4.85116e-40	-0.416683	0.821	0.95	7.43198e-36
Mrc1	4.99227e-40	0.639128	0.208	0.029	7.64816e-36
Arhgap26	5.0427e-40	0.285351	0.212	0.017	7.72542e-36
Pycard	6.2017e-40	-0.465675	0.69	0.913	9.501e-36
Fgl2	6.2365e-40	0.405796	0.281	0.047	9.55432e-36
Lhfpl2	6.86523e-40	-0.606253	0.175	0.559	1.05175e-35
Rps4x	7.1084e-40	0.399868	0.989	0.995	1.08901e-35
Spint1	7.37565e-40	-0.540992	0.172	0.556	1.12995e-35
Tcf4	1.31768e-39	-0.564422	0.515	0.793	2.01868e-35
Tmem55b	1.48039e-39	-0.527449	0.5	0.788	2.26796e-35
Rpl27	2.28647e-39	0.497818	0.883	0.741	3.50287e-35
Mpp1	2.36187e-39	0.480861	0.434	0.163	3.61838e-35
Cd72	2.7065e-39	0.5111	0.219	0.038	4.14636e-35
Aoah	3.67664e-39	0.148106	0.117	0.001	5.63262e-35
Mlxipl	4.24624e-39	-0.517271	0.12	0.49	6.50523e-35
Mlph	4.86126e-39	-0.533378	0.117	0.492	7.44744e-35
Hk2	5.63936e-39	-0.676947	0.391	0.733	8.63949e-35
Cltc	5.87058e-39	-0.522344	0.65	0.87	8.99372e-35
Blnk	6.27797e-39	-0.471997	0.325	0.714	9.61785e-35
Vgll4	6.9321e-39	-0.577603	0.325	0.678	1.062e-34
Fam91a1	7.42171e-39	-0.53287	0.234	0.591	1.13701e-34
B3gnt8	8.37807e-39	0.199229	0.175	0.009	1.28352e-34
Anp32b	8.41416e-39	0.524007	0.755	0.477	1.28905e-34
Pik3r1	1.05314e-38	-0.53363	0.427	0.781	1.61341e-34
Fyn	1.36793e-38	0.395268	0.325	0.066	2.09567e-34
Lmo2	1.41963e-38	-0.475694	0.602	0.855	2.17488e-34
Pdlim4	1.48622e-38	-0.52212	0.223	0.589	2.27689e-34
Cd47	1.76299e-38	0.431155	0.821	0.807	2.70089e-34
Gcnt1	1.76821e-38	-0.544618	0.259	0.614	2.7089e-34
Mgll	2.02911e-38	-0.512378	0.15	0.522	3.10859e-34
Dab2	2.08415e-38	0.570456	0.277	0.088	3.19292e-34
Rassf4	2.10876e-38	0.547295	0.69	0.447	3.23062e-34
Cox5a	2.2135e-38	0.487336	0.803	0.638	3.39108e-34
Itpr2	2.33518e-38	-0.571368	0.328	0.668	3.5775e-34
Cast	2.83099e-38	0.513666	0.515	0.186	4.33707e-34
Taf10	3.78435e-38	0.494623	0.777	0.528	5.79762e-34
Cfl1	5.12742e-38	0.356747	0.956	0.971	7.85521e-34
Snta1	5.43989e-38	-0.472305	0.168	0.53	8.33391e-34
Chd9	7.7887e-38	-0.572483	0.445	0.749	1.19323e-33
Adrb2	1.15008e-37	-0.681062	0.442	0.778	1.76192e-33
St3gal5	1.19948e-37	-0.526504	0.376	0.735	1.83761e-33
Ifi213	1.21507e-37	0.225159	0.131	0.003	1.86149e-33
Tspan4	1.23998e-37	-0.504228	0.208	0.582	1.89965e-33
Arl4c	1.4501e-37	-0.587061	0.584	0.858	2.22156e-33
Mcfd2	1.458e-37	-0.49542	0.277	0.632	2.23366e-33
Arl5c	1.51306e-37	0.572473	0.529	0.187	2.31801e-33
Garnl3	1.52606e-37	-0.502273	0.066	0.41	2.33792e-33
Rps23	1.65457e-37	0.367948	0.989	0.992	2.53481e-33
Calr	1.66851e-37	-0.371179	0.865	0.974	2.55616e-33
Arsb	1.81401e-37	-0.564838	0.274	0.624	2.77907e-33
B4galt4	2.32277e-37	-0.511791	0.186	0.516	3.55849e-33
Csrp2	2.88859e-37	0.179252	0.117	0.002	4.42532e-33
Gapdh	3.65328e-37	0.452547	0.956	0.941	5.59682e-33
Il6st	4.2061e-37	-0.533687	0.27	0.621	6.44374e-33
Prkca	5.20691e-37	-0.463326	0.077	0.42	7.97699e-33
Csf3r	5.32277e-37	-0.497029	0.46	0.781	8.15449e-33
Agmo	6.60856e-37	-0.484298	0.113	0.448	1.01243e-32
Hpgd	6.92755e-37	-0.373991	0.664	0.925	1.0613e-32
3222401L13Rik	7.05125e-37	-0.52178	0.095	0.429	1.08025e-32
Adam10	7.19148e-37	-0.502824	0.471	0.752	1.10174e-32
Tnfrsf1b	7.95756e-37	0.576186	0.646	0.456	1.2191e-32
Lpcat4	8.09364e-37	0.162203	0.117	0.002	1.23995e-32
Nab1	8.29769e-37	0.46651	0.456	0.158	1.27121e-32
Gpr35	8.85215e-37	0.373439	0.285	0.051	1.35615e-32
Hps4	9.98638e-37	-0.506705	0.23	0.601	1.52991e-32
Ccdc88a	1.14338e-36	0.572366	0.595	0.287	1.75166e-32
Atp2c1	1.2762e-36	-0.682972	0.493	0.78	1.95514e-32
Ptp4a3	1.46781e-36	-0.477176	0.299	0.663	2.24869e-32
Klf13	1.92749e-36	0.502293	0.631	0.414	2.95292e-32
Shisa5	1.93551e-36	0.465301	0.755	0.597	2.9652e-32
Lamp2	2.15911e-36	-0.380527	0.825	0.951	3.30775e-32
Cryba4	2.48761e-36	-0.516094	0.146	0.506	3.81102e-32
Dusp2	2.83082e-36	0.828269	0.383	0.095	4.33682e-32
Cks2	3.96992e-36	0.494747	0.281	0.103	6.08192e-32
Akr1b10	4.96448e-36	-0.508137	0.197	0.553	7.60559e-32
Scand1	5.4894e-36	0.496298	0.752	0.602	8.40976e-32
Rhoa	8.49201e-36	0.402729	0.956	0.963	1.30098e-31
Bank1	8.88075e-36	-0.468686	0.099	0.45	1.36053e-31
Orai1	9.97617e-36	-0.454432	0.566	0.832	1.52835e-31
Asah1	1.05107e-35	-0.389216	0.777	0.945	1.61024e-31
H2-Q6	1.11722e-35	0.36748	0.226	0.034	1.71158e-31
Sptbn1	1.40009e-35	0.311914	0.299	0.052	2.14494e-31
Fam167b	1.54281e-35	-0.466555	0.084	0.412	2.36359e-31
Cstb	2.2645e-35	0.572831	0.628	0.405	3.46921e-31
Srrm2	2.58164e-35	-0.414249	0.828	0.957	3.95508e-31
Hint1	3.17095e-35	0.397256	0.843	0.754	4.85789e-31
Grk5	4.05393e-35	0.246509	0.161	0.009	6.21062e-31
Oas1a	4.08313e-35	0.193023	0.168	0.01	6.25535e-31
Dhrs3	4.37056e-35	-0.477149	0.361	0.718	6.6957e-31
Ppp2r5a	4.43389e-35	0.530234	0.544	0.307	6.79272e-31
Cyba	5.53912e-35	0.354176	0.985	0.993	8.48593e-31
Rilpl2	5.64289e-35	0.461234	0.391	0.122	8.64491e-31
Tmem38b	5.70131e-35	0.441231	0.347	0.104	8.73441e-31
Cers6	5.94742e-35	0.397483	0.372	0.097	9.11145e-31
Pdgfb	6.88044e-35	-0.6002	0.372	0.726	1.05408e-30
Ptpn22	7.74842e-35	0.271599	0.219	0.024	1.18706e-30
Plekho1	8.57435e-35	-0.459277	0.635	0.883	1.31359e-30
Rab6b	9.8015e-35	-0.437207	0.135	0.485	1.50159e-30
Dusp7	1.00624e-34	-0.494931	0.204	0.564	1.54156e-30
Rarg	1.0606e-34	0.161969	0.179	0.013	1.62483e-30
Arhgef40	1.07748e-34	-0.505017	0.157	0.508	1.65071e-30
Gpr155	1.27086e-34	-0.477664	0.193	0.544	1.94696e-30
Cox5b	1.27816e-34	0.449688	0.847	0.666	1.95815e-30
Ttc28	1.31638e-34	-0.534325	0.172	0.52	2.0167e-30
Mzt2	1.46064e-34	-0.477454	0.186	0.492	2.23771e-30
Gk	2.1835e-34	0.349834	0.204	0.03	3.34512e-30
Ier2	2.40822e-34	0.591916	0.712	0.341	3.68939e-30
St6galnac4	2.44025e-34	-0.448197	0.31	0.661	3.73846e-30
Rap1gap2	2.78504e-34	0.40922	0.292	0.087	4.26667e-30
Soga1	2.94715e-34	-0.503224	0.212	0.541	4.51504e-30
Rcsd1	2.94905e-34	-0.537044	0.398	0.717	4.51795e-30
Svil	3.19984e-34	0.424018	0.387	0.121	4.90216e-30
Sh3pxd2b	3.51823e-34	0.13906	0.117	0.003	5.38993e-30
Cox7c	3.79935e-34	0.413729	0.854	0.813	5.8206e-30
Plcb1	5.16148e-34	0.133533	0.102	0.001	7.90738e-30
Pdia6	5.39458e-34	-0.377651	0.715	0.916	8.26449e-30
Pald1	5.80336e-34	-0.422689	0.124	0.475	8.89074e-30
Isg15	7.36762e-34	0.687068	0.234	0.064	1.12872e-29
Itgb2	7.43112e-34	0.577711	0.821	0.793	1.13845e-29
Mpc1	7.71948e-34	-0.45535	0.591	0.841	1.18262e-29
Zfp90	7.78874e-34	-0.492011	0.175	0.514	1.19323e-29
Nfil3	9.1601e-34	0.450648	0.223	0.047	1.40333e-29
AI504432	1.03365e-33	0.239561	0.215	0.024	1.58356e-29
Clec5a	1.04308e-33	-0.484513	0.252	0.596	1.598e-29
Gm32849	1.1032e-33	-0.427007	0.047	0.344	1.69011e-29
Tmem63a	1.11868e-33	-0.477115	0.15	0.471	1.71382e-29
Crybg1	1.72998e-33	0.142685	0.12	0.003	2.65034e-29
Sap30	2.18859e-33	0.446232	0.445	0.158	3.35292e-29
Rpl3	2.29207e-33	0.353132	0.982	0.984	3.51146e-29
Cox6c	2.63428e-33	0.442115	0.843	0.727	4.03571e-29
Tubgcp5	2.66179e-33	-0.507192	0.204	0.556	4.07786e-29
Fam107b	3.04091e-33	0.478809	0.416	0.147	4.65868e-29
Spcs2	3.19604e-33	-0.373855	0.803	0.928	4.89634e-29
Cryl1	3.81312e-33	-0.484718	0.226	0.534	5.84169e-29
Naa35	3.95533e-33	-0.498711	0.263	0.607	6.05957e-29
Psme1	4.10139e-33	0.443044	0.854	0.739	6.28333e-29
H2afy	4.21311e-33	0.416848	0.755	0.704	6.45449e-29
Tnfrsf17	5.44542e-33	-0.412437	0.033	0.32	8.34239e-29
Tmem50a	5.45606e-33	-0.367984	0.843	0.953	8.35869e-29
Il6ra	7.36058e-33	-0.476211	0.599	0.843	1.12764e-28
Iffo1	7.4496e-33	-0.499384	0.204	0.53	1.14128e-28
Cd69	7.5098e-33	0.213337	0.109	0.002	1.1505e-28
B4galt5	7.69035e-33	0.398055	0.296	0.063	1.17816e-28
H2-DMb2	7.93314e-33	0.396369	0.135	0.043	1.21536e-28
Klhdc8b	1.11826e-32	-0.406419	0.055	0.34	1.71317e-28
Rin2	1.12031e-32	-0.452523	0.383	0.707	1.71631e-28
Creg1	1.33151e-32	-0.390019	0.755	0.929	2.03987e-28
Nectin1	1.92359e-32	0.174059	0.117	0.003	2.94694e-28
Rsrp1	2.14847e-32	-0.385565	0.839	0.963	3.29145e-28
Ndfip2	2.23579e-32	-0.46813	0.372	0.655	3.42523e-28
Pabpc1	2.43238e-32	0.408484	0.938	0.885	3.7264e-28
Helz2	3.03159e-32	0.127948	0.106	0.002	4.64439e-28
Klrk1	3.43265e-32	0.2048	0.102	0.002	5.25882e-28
Pon3	3.48524e-32	-0.412536	0.124	0.451	5.33939e-28
Cebpzos	3.64798e-32	-0.482297	0.285	0.623	5.5887e-28
Cables1	3.92019e-32	-0.464453	0.128	0.441	6.00573e-28
Rpl29	4.28008e-32	0.365225	0.945	0.962	6.55708e-28
Cd84	4.48487e-32	-0.453962	0.493	0.799	6.87082e-28
Cd53	4.53911e-32	-0.331046	0.905	0.976	6.95391e-28
Rasal3	4.92009e-32	-0.486052	0.241	0.571	7.53758e-28
AC163018.1	5.10461e-32	0.25675	0.15	0.01	7.82026e-28
Bri3bp	9.51175e-32	0.34848	0.38	0.106	1.4572e-27
Rpl37	1.18287e-31	0.333856	0.974	0.99	1.81216e-27
Rpl23a	1.33195e-31	0.402217	0.938	0.929	2.04055e-27
Ctsa	1.38808e-31	-0.33561	0.861	0.968	2.12654e-27
Sulf2	1.64252e-31	0.230917	0.201	0.022	2.51635e-27
Tmed9	1.70103e-31	-0.370599	0.73	0.906	2.60598e-27
Slc7a7	1.85122e-31	-0.485087	0.237	0.564	2.83606e-27
Pld1	2.47374e-31	-0.448858	0.124	0.447	3.78978e-27
Wnk1	2.79585e-31	-0.434513	0.701	0.899	4.28324e-27
Mbnl1	3.46962e-31	-0.403921	0.828	0.958	5.31546e-27
Slc1a5	3.74725e-31	0.162465	0.164	0.013	5.74079e-27
Cdkn2d	3.80542e-31	0.376136	0.332	0.09	5.82991e-27
Capns1	3.87581e-31	0.45142	0.807	0.598	5.93774e-27
Selenos	3.90683e-31	-0.428281	0.555	0.812	5.98527e-27
Capza2	3.94362e-31	-0.300784	0.927	0.985	6.04163e-27
Msn	3.96221e-31	0.459656	0.905	0.891	6.07011e-27
Wasf2	4.17115e-31	-0.419361	0.752	0.897	6.3902e-27
Gabbr1	4.99923e-31	-0.407069	0.095	0.395	7.65882e-27
Npm1	5.12052e-31	0.452461	0.923	0.873	7.84464e-27
Uqcrh	5.69637e-31	0.372497	0.883	0.827	8.72683e-27
Dusp6	6.40957e-31	-0.52728	0.431	0.74	9.81946e-27
Acads	6.65985e-31	-0.461198	0.288	0.583	1.02029e-26
Vill	7.43265e-31	0.16949	0.131	0.006	1.13868e-26
Tspan7	7.80847e-31	-0.430044	0.15	0.483	1.19626e-26
Mlec	8.40056e-31	-0.471584	0.416	0.708	1.28697e-26
Kcnk13	9.13831e-31	-0.376419	0.164	0.51	1.39999e-26
Inpp4b	1.28969e-30	-0.471488	0.172	0.501	1.97581e-26
Ap1s2	1.55266e-30	0.461126	0.602	0.335	2.37868e-26
Myadm	1.60133e-30	0.458348	0.526	0.276	2.45323e-26
Msrb2	1.60871e-30	-0.437672	0.146	0.453	2.46454e-26
Eno1	1.6594e-30	0.460085	0.748	0.609	2.5422e-26
Tlr3	1.7301e-30	-0.435424	0.102	0.41	2.65052e-26
C3ar1	1.73408e-30	-0.218426	0.347	0.687	2.65662e-26
Rel	3.09579e-30	0.530249	0.661	0.49	4.74275e-26
Hpcal1	3.30407e-30	0.384115	0.467	0.19	5.06183e-26
Cadm1	3.7641e-30	-0.185528	0.237	0.559	5.76661e-26
Apbb1ip	3.80843e-30	-0.334683	0.839	0.963	5.83451e-26
Kcnk6	4.55576e-30	-0.448955	0.15	0.471	6.97943e-26
Tln2	5.11846e-30	-0.408331	0.062	0.347	7.84148e-26
Stk24	5.42923e-30	0.477908	0.588	0.366	8.31757e-26
Sorl1	5.44034e-30	0.430286	0.412	0.181	8.3346e-26
Pqlc1	5.87525e-30	0.269366	0.274	0.053	9.00089e-26
Dtx4	6.6766e-30	-0.420653	0.15	0.481	1.02285e-25
Rcbtb2	7.19607e-30	-0.458721	0.412	0.7	1.10244e-25
Lman1	7.32358e-30	-0.461775	0.376	0.667	1.12197e-25
Abcc3	9.07616e-30	-0.411661	0.146	0.473	1.39047e-25
Arhgef3	1.00658e-29	0.340669	0.263	0.059	1.54208e-25
Havcr2	1.07508e-29	-0.410655	0.467	0.773	1.64703e-25
Tmem176b	1.27488e-29	0.0474203	0.661	0.898	1.95312e-25
Pnisr	1.36924e-29	-0.460628	0.617	0.845	2.09767e-25
Sipa1	1.40262e-29	-0.444645	0.474	0.715	2.14881e-25
Ccr1	1.42903e-29	0.352188	0.164	0.014	2.18927e-25
Capn1	1.48305e-29	0.192801	0.179	0.018	2.27204e-25
Plcl2	1.53258e-29	-0.467109	0.248	0.559	2.3479e-25
Add3	1.57288e-29	0.444951	0.522	0.295	2.40965e-25
Chd7	1.96476e-29	-0.490122	0.339	0.625	3.01001e-25
Eef1g	2.24121e-29	0.460786	0.825	0.685	3.43353e-25
2310001H17Rik	3.04138e-29	0.213948	0.168	0.015	4.6594e-25
Tgfbr2	3.09978e-29	-0.376382	0.518	0.791	4.74886e-25
Slc3a2	3.20175e-29	-0.379575	0.606	0.869	4.90508e-25
Serpinb6a	3.30566e-29	0.387558	0.193	0.076	5.06428e-25
Ptpra	4.36187e-29	-0.432627	0.482	0.776	6.68239e-25
Git2	4.36202e-29	-0.492638	0.595	0.822	6.68261e-25
Sbf2	5.38241e-29	-0.445036	0.164	0.487	8.24585e-25
Pura	6.01299e-29	-0.464827	0.507	0.757	9.2119e-25
Serp1	6.10113e-29	0.460223	0.77	0.588	9.34693e-25
Fmnl3	6.72964e-29	-0.455178	0.252	0.563	1.03098e-24
Cd40	7.04797e-29	0.18062	0.113	0.004	1.07975e-24
Eml2	8.65135e-29	0.159399	0.135	0.008	1.32539e-24
2010107E04Rik	9.82644e-29	0.46051	0.755	0.54	1.50541e-24
Siva1	9.8422e-29	0.356141	0.449	0.163	1.50783e-24
Pgk1	1.00322e-28	0.441785	0.628	0.385	1.53693e-24
Rock2	1.08871e-28	-0.4695	0.569	0.79	1.66791e-24
Dazap2	1.20505e-28	0.410723	0.755	0.58	1.84613e-24
Tubb6	1.71197e-28	0.225084	0.201	0.026	2.62275e-24
Papss1	2.14717e-28	-0.419613	0.303	0.606	3.28947e-24
Fli1	2.31256e-28	-0.465118	0.365	0.663	3.54284e-24
Pkig	2.53333e-28	-0.449039	0.391	0.676	3.88105e-24
Milr1	2.54512e-28	0.431062	0.412	0.144	3.89912e-24
Ifrd1	2.76954e-28	0.602474	0.54	0.315	4.24294e-24
Bst2	2.77602e-28	0.54989	0.693	0.658	4.25287e-24
Cmtm7	3.16291e-28	-0.391409	0.715	0.905	4.84558e-24
Cflar	4.10112e-28	-0.437493	0.493	0.753	6.28291e-24
Rpl22l1	4.51782e-28	0.435772	0.825	0.66	6.9213e-24
Pdk1	4.75043e-28	-0.396151	0.124	0.44	7.27766e-24
Qpct	4.92699e-28	0.205654	0.161	0.015	7.54815e-24
Clasp2	5.4456e-28	-0.461003	0.296	0.575	8.34267e-24
Tsc22d4	5.73554e-28	-0.431048	0.631	0.84	8.78685e-24
Luc7l2	5.95396e-28	-0.449771	0.719	0.886	9.12146e-24
Tnfaip8l2	6.2067e-28	-0.381915	0.653	0.862	9.50866e-24
Rgmb	6.45546e-28	-0.41392	0.157	0.459	9.88977e-24
Prkcd	6.7118e-28	0.440871	0.825	0.771	1.02825e-23
Epsti1	6.81839e-28	0.447301	0.577	0.384	1.04458e-23
Lpin2	7.4147e-28	-0.468274	0.314	0.611	1.13593e-23
Cd48	7.44721e-28	0.435588	0.77	0.59	1.14091e-23
Ank2	8.19105e-28	-0.426549	0.124	0.42	1.25487e-23
Alox5ap	9.13764e-28	0.386447	0.901	0.915	1.39989e-23
Numa1	9.84155e-28	-0.47349	0.288	0.587	1.50772e-23
mt-Co1	9.90993e-28	0.359058	0.982	0.995	1.5182e-23
Il1a	1.00217e-27	-0.342243	0.201	0.527	1.53532e-23
Ccng2	1.03576e-27	-0.447663	0.204	0.505	1.58679e-23
Klf2	1.17374e-27	0.524521	0.617	0.289	1.79818e-23
Rpl30	1.19161e-27	0.317944	1	0.996	1.82554e-23
Nsa2	1.25716e-27	0.420195	0.788	0.618	1.92596e-23
Itpr1	1.28114e-27	0.254415	0.248	0.046	1.96271e-23
Ggt5	1.29033e-27	-0.3587	0.047	0.316	1.97679e-23
P3h2	1.53186e-27	-0.369697	0.069	0.347	2.34682e-23
1110008P14Rik	1.76668e-27	0.278762	0.226	0.039	2.70655e-23
Maml3	2.13753e-27	-0.470372	0.234	0.514	3.2747e-23
Ncf1	2.31136e-27	-0.457507	0.609	0.831	3.541e-23
Tma7	2.90028e-27	0.407154	0.843	0.692	4.44323e-23
Eng	3.00619e-27	-0.379088	0.15	0.443	4.60548e-23
Gp9	3.39495e-27	-0.385793	0.069	0.342	5.20106e-23
BC037034	3.68074e-27	-0.43797	0.274	0.567	5.63889e-23
Hhex	3.88677e-27	-0.467763	0.372	0.639	5.95454e-23
Ptgs2	3.94022e-27	0.641691	0.175	0.021	6.03641e-23
Hsp90ab1	4.11393e-27	0.337212	0.971	0.984	6.30254e-23
Aph1c	5.10542e-27	0.237946	0.204	0.029	7.82151e-23
Map4k4	5.99096e-27	-0.411447	0.631	0.845	9.17814e-23
Arhgef10l	6.3216e-27	0.361022	0.277	0.108	9.68468e-23
Mafg	6.34889e-27	-0.461576	0.376	0.677	9.72651e-23
Smc6	6.36627e-27	0.57485	0.577	0.389	9.75312e-23
Rptor	7.54012e-27	-0.438759	0.208	0.498	1.15515e-22
Gtf2i	8.08501e-27	-0.427746	0.201	0.481	1.23862e-22
Noct	9.47399e-27	0.156108	0.128	0.008	1.45142e-22
Fam110a	1.27358e-26	-0.386843	0.084	0.368	1.95113e-22
Mfng	1.32887e-26	-0.402082	0.281	0.578	2.03583e-22
Lamp1	1.42437e-26	-0.207601	0.92	0.991	2.18213e-22
Snx29	1.48377e-26	-0.421679	0.219	0.52	2.27313e-22
Rassf3	1.60858e-26	0.343265	0.394	0.136	2.46435e-22
Ddah2	1.72274e-26	-0.309329	0.095	0.39	2.63924e-22
Cox4i1	1.79387e-26	0.332529	0.964	0.944	2.74821e-22
Arhgap12	1.81001e-26	-0.437216	0.215	0.511	2.77294e-22
Ly6e	1.83874e-26	0.368487	0.901	0.979	2.81695e-22
Idh2	1.88038e-26	-0.406953	0.31	0.601	2.88075e-22
Acp2	2.03038e-26	-0.420863	0.277	0.593	3.11055e-22
Scarb2	2.18891e-26	-0.429222	0.515	0.742	3.35341e-22
Rap1a	2.21367e-26	0.400032	0.869	0.844	3.39135e-22
Gpcpd1	2.25572e-26	0.424906	0.474	0.281	3.45577e-22
Pde4b	2.33902e-26	0.408955	0.376	0.145	3.58338e-22
Psap	2.39484e-26	0.320461	0.982	0.996	3.6689e-22
Asph	2.43638e-26	-0.376943	0.551	0.817	3.73254e-22
G0s2	2.76728e-26	0.305043	0.12	0.013	4.23948e-22
Mid1ip1	2.87867e-26	-0.53524	0.365	0.643	4.41012e-22
Plgrkt	2.89747e-26	-0.438577	0.46	0.711	4.43892e-22
Prkab1	3.46768e-26	-0.383667	0.131	0.414	5.31248e-22
Ccni	3.66998e-26	-0.422502	0.445	0.678	5.62241e-22
Gmpr	3.68507e-26	-0.368739	0.102	0.387	5.64553e-22
Cdk5r1	3.80144e-26	-0.376449	0.077	0.359	5.8238e-22
Scamp5	4.16519e-26	-0.340722	0.069	0.345	6.38107e-22
Sort1	4.22791e-26	-0.409432	0.168	0.465	6.47716e-22
Son	4.6643e-26	-0.328658	0.872	0.971	7.14571e-22
Rnf149	5.53685e-26	0.45951	0.617	0.488	8.48245e-22
Gpr84	6.02789e-26	-0.312221	0.226	0.55	9.23473e-22
Kcnk12	6.12404e-26	-0.337977	0.044	0.29	9.38203e-22
Scn1b	6.72177e-26	-0.428457	0.175	0.477	1.02977e-21
Kif21b	6.98334e-26	-0.437321	0.343	0.603	1.06985e-21
B430010I23Rik	8.79498e-26	-0.471768	0.091	0.363	1.34739e-21
Ptpn6	9.6682e-26	0.439967	0.803	0.748	1.48117e-21
Fam241a	9.77391e-26	0.252172	0.15	0.016	1.49736e-21
Palm	9.81199e-26	0.156867	0.117	0.007	1.5032e-21
Ssbp4	1.47927e-25	-0.416351	0.456	0.691	2.26624e-21
Stk38	1.57765e-25	0.468717	0.595	0.366	2.41697e-21
Nop10	1.81139e-25	0.454244	0.628	0.386	2.77506e-21
Gna12	1.84972e-25	-0.397386	0.336	0.626	2.83377e-21
Hnmt	1.86192e-25	-0.373625	0.095	0.361	2.85245e-21
Ubash3b	2.19703e-25	-0.395742	0.358	0.625	3.36585e-21
Adap2os	2.20598e-25	-0.357804	0.12	0.417	3.37957e-21
Tmem176a	2.4666e-25	0.220164	0.595	0.752	3.77883e-21
Lmo4	2.56954e-25	0.434582	0.566	0.301	3.93654e-21
Irf2bpl	2.77247e-25	-0.463004	0.234	0.526	4.24743e-21
Arhgap9	2.84466e-25	0.36946	0.478	0.217	4.35801e-21
Clstn1	3.04874e-25	-0.35517	0.117	0.411	4.67067e-21
Sod2	3.28503e-25	0.44304	0.547	0.316	5.03266e-21
Sdc3	4.69019e-25	0.317576	0.325	0.097	7.18536e-21
Il3ra	4.80443e-25	0.208324	0.193	0.03	7.36038e-21
Nup210	5.11717e-25	0.161017	0.153	0.016	7.8395e-21
Bcl11a	5.51728e-25	0.187155	0.172	0.021	8.45248e-21
Nod1	6.22189e-25	0.283797	0.201	0.056	9.53194e-21
Arrb2	6.4567e-25	-0.421298	0.467	0.709	9.89167e-21
Evi2a	6.75503e-25	-0.386509	0.657	0.873	1.03487e-20
Ikbkb	7.67067e-25	0.42437	0.639	0.47	1.17515e-20
Gcn1l1	8.66268e-25	-0.386174	0.23	0.531	1.32712e-20
Aldoa	8.84836e-25	0.412154	0.85	0.79	1.35557e-20
Reep3	1.00982e-24	-0.443824	0.434	0.68	1.54704e-20
Myo1f	1.01971e-24	0.437	0.661	0.456	1.5622e-20
Tmpo	1.10877e-24	0.407669	0.558	0.288	1.69863e-20
6430548M08Rik	1.11506e-24	0.326884	0.212	0.049	1.70827e-20
Rab3d	1.14366e-24	0.129506	0.139	0.012	1.75209e-20
Ccl9	1.23678e-24	0.578518	0.588	0.465	1.89475e-20
Nuak1	1.35004e-24	-0.40035	0.157	0.448	2.06825e-20
Stard3	1.65634e-24	-0.354098	0.405	0.668	2.53751e-20
Cd300lf	1.8777e-24	0.173093	0.135	0.011	2.87663e-20
Arl6ip1	2.22146e-24	-0.305467	0.807	0.944	3.40328e-20
Serpinf1	2.24865e-24	-0.384468	0.106	0.385	3.44492e-20
Snrpe	2.73162e-24	0.371527	0.766	0.529	4.18485e-20
Ddx5	2.73703e-24	-0.235459	0.923	0.995	4.19312e-20
Atp6ap2	2.90858e-24	-0.343617	0.65	0.844	4.45594e-20
H2-T23	3.24984e-24	0.40783	0.821	0.738	4.97876e-20
Bin2	3.48439e-24	-0.331619	0.755	0.904	5.33809e-20
1810011H11Rik	4.08738e-24	-0.377959	0.172	0.457	6.26186e-20
Slc50a1	4.1674e-24	-0.413026	0.387	0.621	6.38446e-20
Flt1	5.44326e-24	0.138497	0.109	0.006	8.33907e-20
Snx6	5.49279e-24	-0.363446	0.474	0.73	8.41496e-20
Prr5l	5.74969e-24	0.212084	0.19	0.029	8.80853e-20
Antxr2	5.92429e-24	0.119243	0.106	0.005	9.07601e-20
Atp5b	5.96379e-24	0.347106	0.854	0.787	9.13653e-20
Rhobtb1	6.01363e-24	-0.337416	0.062	0.31	9.21289e-20
Map1lc3a	6.017e-24	-0.410801	0.307	0.555	9.21804e-20
Csad	6.15391e-24	-0.409115	0.164	0.418	9.42779e-20
Rpl5	6.4145e-24	0.333013	0.96	0.972	9.82701e-20
Id3	6.83791e-24	0.229002	0.106	0.006	1.04757e-19
Arf5	6.85826e-24	0.336426	0.832	0.777	1.05069e-19
Tmx4	7.15097e-24	-0.583246	0.252	0.546	1.09553e-19
Hck	7.37988e-24	0.461292	0.763	0.684	1.1306e-19
Aprt	7.49809e-24	0.462208	0.562	0.357	1.14871e-19
Bcl2a1a	7.53665e-24	0.429331	0.383	0.235	1.15461e-19
Fam46c	7.86444e-24	-0.280657	0.27	0.578	1.20483e-19
Sec61g	8.46077e-24	0.458781	0.894	0.746	1.29619e-19
Rap1b	9.49129e-24	0.395018	0.898	0.941	1.45407e-19
Rgs2	1.04442e-23	-0.391464	0.763	0.929	1.60006e-19
Avpi1	1.07691e-23	0.306217	0.168	0.025	1.64982e-19
Bmyc	1.11095e-23	-0.393257	0.467	0.725	1.70197e-19
Nes	1.11501e-23	0.241095	0.131	0.015	1.7082e-19
Taz	1.22185e-23	-0.411468	0.35	0.595	1.87187e-19
Rassf2	1.27852e-23	-0.418253	0.347	0.597	1.9587e-19
Nr3c1	1.31886e-23	-0.408539	0.54	0.758	2.02049e-19
Ergic3	1.3238e-23	-0.367041	0.547	0.767	2.02807e-19
Acot9	1.60445e-23	0.36482	0.328	0.11	2.45802e-19
Arl1	1.65618e-23	-0.385015	0.529	0.713	2.53727e-19
Bbs9	1.67027e-23	-0.328716	0.069	0.299	2.55885e-19
Mbd2	1.73184e-23	0.366701	0.588	0.312	2.65318e-19
Cd300a	1.86587e-23	0.387941	0.785	0.776	2.85851e-19
Nfia	1.9493e-23	-0.407931	0.142	0.413	2.98632e-19
Zfp691	1.97653e-23	-0.347163	0.069	0.324	3.02805e-19
Man1c1	2.03375e-23	-0.3639	0.318	0.606	3.11571e-19
B4galt1	2.23246e-23	-0.414881	0.288	0.531	3.42012e-19
Eif4a1	2.29007e-23	0.3366	0.887	0.906	3.50838e-19
Dok3	2.48515e-23	0.381427	0.442	0.242	3.80725e-19
Myo1b	2.5043e-23	-0.361517	0.106	0.377	3.83659e-19
Liph	2.65995e-23	-0.337192	0.058	0.28	4.07505e-19
Asb2	2.73626e-23	-0.368277	0.095	0.352	4.19194e-19
Tacc1	2.92467e-23	-0.381697	0.697	0.84	4.48059e-19
Eif3i	3.03455e-23	0.355565	0.697	0.536	4.64894e-19
Nr4a3	3.05971e-23	0.383972	0.15	0.02	4.68747e-19
Capzb	3.23076e-23	0.342676	0.905	0.883	4.94953e-19
Plk2	3.83102e-23	0.307263	0.139	0.016	5.86912e-19
Csgalnact2	3.89505e-23	0.320388	0.31	0.094	5.96721e-19
Abhd17c	4.0123e-23	-0.375422	0.157	0.417	6.14684e-19
Rnaset2a	4.25723e-23	-0.407604	0.372	0.617	6.52207e-19
Chst7	4.42559e-23	-0.369285	0.117	0.381	6.78e-19
Ptpn12	5.17083e-23	0.325415	0.266	0.073	7.9217e-19
A830008E24Rik	5.19652e-23	-0.372929	0.066	0.304	7.96107e-19
Pid1	5.51739e-23	0.411668	0.679	0.59	8.45264e-19
Macf1	5.6492e-23	-0.403029	0.781	0.902	8.65458e-19
Gng5	5.88216e-23	0.335761	0.938	0.917	9.01147e-19
Tlr2	6.10438e-23	0.39847	0.515	0.455	9.3519e-19
Rps21	6.13618e-23	0.310734	0.993	0.992	9.40063e-19
Hnrnpf	6.54233e-23	0.299449	0.905	0.892	1.00228e-18
Nlrc5	6.69052e-23	0.145389	0.113	0.007	1.02499e-18
Tuba1c	7.08986e-23	0.270912	0.219	0.044	1.08617e-18
P2rx7	7.45751e-23	-0.383566	0.208	0.478	1.14249e-18
Ptk2b	7.52687e-23	0.433883	0.533	0.335	1.15312e-18
Dusp1	7.54358e-23	0.784581	0.628	0.4	1.15568e-18
1700025G04Rik	7.57518e-23	0.242328	0.248	0.057	1.16052e-18
Apobec1	8.00751e-23	0.396241	0.474	0.26	1.22675e-18
Psme2	8.50685e-23	0.37653	0.766	0.576	1.30325e-18
Rabac1	8.55391e-23	-0.316384	0.763	0.899	1.31046e-18
Tm9sf2	8.87612e-23	-0.38474	0.456	0.683	1.35982e-18
Cnpy2	9.25357e-23	-0.363955	0.445	0.688	1.41765e-18
Txndc15	1.02432e-22	-0.365009	0.369	0.617	1.56926e-18
Ccdc93	1.08684e-22	-0.390301	0.164	0.425	1.66504e-18
Dnase2a	1.13973e-22	-0.414657	0.394	0.654	1.74607e-18
Ier5	1.19968e-22	-0.4679	0.839	0.955	1.83791e-18
Eif3e	1.23489e-22	0.357796	0.752	0.626	1.89186e-18
Cep68	1.37538e-22	-0.370736	0.12	0.378	2.10708e-18
Zfyve9	1.37818e-22	0.383738	0.27	0.115	2.11138e-18
Cycs	1.48019e-22	0.396508	0.577	0.395	2.26765e-18
Sipa1l2	1.49273e-22	-0.381111	0.153	0.414	2.28686e-18
Cd300c2	1.50127e-22	-0.233257	0.839	0.968	2.29994e-18
Tpbgl	1.62949e-22	-0.344367	0.077	0.314	2.49638e-18
Nfkb2	1.74943e-22	0.264453	0.299	0.086	2.68013e-18
Bola2	1.75666e-22	0.394726	0.58	0.322	2.6912e-18
Comtd1	1.77984e-22	-0.394931	0.204	0.471	2.72672e-18
Ralgps2	1.88792e-22	-0.366712	0.099	0.353	2.8923e-18
Rogdi	1.98675e-22	-0.378182	0.266	0.512	3.0437e-18
Dock10	2.2689e-22	-0.394209	0.628	0.826	3.47596e-18
Tspan17	2.3655e-22	0.147898	0.139	0.014	3.62395e-18
Pot1b	2.4699e-22	0.420846	0.266	0.094	3.78388e-18
Ldlrad4	2.47384e-22	-0.321434	0.157	0.424	3.78993e-18
Fcer1g	2.53141e-22	0.283811	0.989	0.999	3.87811e-18
Ostf1	3.01104e-22	0.332589	0.858	0.796	4.61291e-18
Tmem144	3.30247e-22	-0.333919	0.066	0.306	5.05939e-18
Atp5d	3.33797e-22	0.32445	0.828	0.713	5.11377e-18
Npl	4.07668e-22	-0.325332	0.146	0.427	6.24547e-18
Xlr	4.14279e-22	-0.299619	0.182	0.472	6.34675e-18
Gpr146	4.19439e-22	-0.378135	0.139	0.393	6.42581e-18
Cmtm8	4.49492e-22	-0.319213	0.088	0.304	6.88621e-18
Slc37a2	4.70143e-22	-0.366297	0.164	0.44	7.2026e-18
Fmnl1	4.75504e-22	0.41791	0.661	0.49	7.28473e-18
Atp6v0a2	4.96586e-22	-0.349302	0.266	0.543	7.60769e-18
Sash1	5.20826e-22	0.164292	0.142	0.016	7.97905e-18
Eef1b2	6.11966e-22	0.320035	0.956	0.95	9.37532e-18
Emilin1	6.12696e-22	0.124414	0.109	0.007	9.38651e-18
Hivep3	6.71906e-22	-0.405993	0.281	0.554	1.02936e-17
Manf	7.73982e-22	-0.338135	0.595	0.814	1.18574e-17
Rpl36a	7.89859e-22	0.324097	0.934	0.912	1.21006e-17
Rps27l	7.95587e-22	0.358034	0.73	0.558	1.21884e-17
Psmb9	8.36887e-22	0.38057	0.686	0.506	1.28211e-17
Lbh	8.40381e-22	0.297884	0.358	0.123	1.28746e-17
Rapsn	9.13956e-22	-0.347785	0.091	0.348	1.40018e-17
Hmgn1	9.25128e-22	-0.311795	0.387	0.671	1.4173e-17
Ctsb	1.13602e-21	-0.0482942	0.967	0.999	1.74039e-17
Ets1	1.20134e-21	-0.338841	0.208	0.498	1.84045e-17
Ctsc	1.22886e-21	0.280388	0.803	0.91	1.88262e-17
Cebpg	1.33409e-21	-0.392679	0.496	0.714	2.04383e-17
B4gat1	1.36619e-21	-0.332211	0.12	0.375	2.093e-17
Rap2b	1.39017e-21	0.24007	0.328	0.104	2.12974e-17
Etv5	1.44143e-21	-0.344458	0.102	0.349	2.20828e-17
Zfp697	1.46962e-21	-0.299199	0.026	0.23	2.25145e-17
Plxnb2	1.60965e-21	-0.316842	0.544	0.761	2.46599e-17
Cysltr1	1.82711e-21	-0.411241	0.325	0.573	2.79913e-17
Snx24	1.89815e-21	-0.353633	0.131	0.398	2.90797e-17
Foxn2	2.26021e-21	0.277782	0.27	0.075	3.46265e-17
Ripor2	2.42555e-21	0.27776	0.168	0.031	3.71594e-17
Abl1	2.44588e-21	-0.3523	0.252	0.493	3.7471e-17
Irf2bp2	2.46706e-21	-0.385766	0.588	0.805	3.77953e-17
Snrpb	2.53897e-21	0.33221	0.818	0.737	3.88969e-17
Tfe3	2.97101e-21	-0.409922	0.347	0.601	4.55159e-17
Btg1	3.97543e-21	0.430205	0.861	0.896	6.09036e-17
Gm40841	4.02797e-21	-0.360074	0.066	0.288	6.17085e-17
Erf	4.07798e-21	-0.342547	0.117	0.352	6.24747e-17
Usp24	4.19443e-21	-0.389036	0.212	0.472	6.42587e-17
Senp2	4.21633e-21	-0.447516	0.376	0.606	6.45941e-17
Hnrnpa3	4.3905e-21	0.360386	0.88	0.778	6.72625e-17
Plin3	4.8798e-21	0.210114	0.274	0.075	7.47585e-17
Rhof	5.36466e-21	0.169348	0.106	0.008	8.21866e-17
Agpat3	5.78079e-21	-0.305646	0.237	0.525	8.85617e-17
Tgfa	6.54003e-21	-0.329703	0.095	0.328	1.00193e-16
Ppia	6.59804e-21	0.252084	0.982	0.994	1.01082e-16
Ramp1	7.5916e-21	0.40177	0.518	0.277	1.16303e-16
Ifit3	7.85985e-21	0.371142	0.12	0.026	1.20413e-16
Tmem206	8.1432e-21	-0.347611	0.131	0.382	1.24754e-16
Skil	8.29521e-21	-0.225263	0.58	0.826	1.27083e-16
Pecr	8.61554e-21	-0.312278	0.084	0.316	1.3199e-16
2020-09-06	1.16723e-20	0.277549	0.223	0.054	1.7882e-16
Nt5c	1.18568e-20	0.320896	0.555	0.285	1.81646e-16
mt-Co2	1.22991e-20	0.308231	0.971	0.994	1.88422e-16
Cd274	1.31304e-20	0.324334	0.215	0.071	2.01158e-16
Edem1	1.35805e-20	-0.349404	0.434	0.659	2.08053e-16
Slc12a2	1.73985e-20	0.0710111	0.347	0.565	2.66545e-16
Srsf9	1.80578e-20	-0.322958	0.672	0.838	2.76646e-16
Slc36a1	1.86897e-20	-0.34981	0.142	0.357	2.86326e-16
Fkbp2	1.97371e-20	-0.369224	0.536	0.749	3.02373e-16
Trim25	1.97579e-20	0.325387	0.296	0.1	3.02691e-16
Tspan18	2.0145e-20	-0.26417	0.029	0.234	3.08621e-16
Gimap1	2.19707e-20	-0.277742	0.04	0.25	3.36592e-16
Foxn3	2.20609e-20	-0.330553	0.62	0.83	3.37974e-16
Rtn1	2.30085e-20	-0.349497	0.237	0.494	3.5249e-16
Cerk	2.44466e-20	-0.382006	0.339	0.588	3.74522e-16
Fbrsl1	2.45934e-20	-0.388859	0.274	0.498	3.76771e-16
Hvcn1	2.58039e-20	-0.325728	0.237	0.522	3.95316e-16
Fam20c	2.63086e-20	0.217206	0.172	0.029	4.03048e-16
Megf9	2.818e-20	0.25583	0.128	0.024	4.31717e-16
Aldh3b1	2.97719e-20	0.28665	0.332	0.123	4.56105e-16
Med12l	3.02646e-20	-0.290494	0.044	0.241	4.63654e-16
Il17ra	3.03722e-20	0.36887	0.569	0.493	4.65302e-16
E2f2	3.27314e-20	0.181368	0.142	0.02	5.01445e-16
Galnt12	3.28615e-20	-0.342973	0.139	0.362	5.03439e-16
Slc25a37	3.39001e-20	-0.366297	0.164	0.396	5.1935e-16
Fam96a	3.46001e-20	0.371204	0.577	0.401	5.30074e-16
Ybx3	3.82655e-20	0.331768	0.42	0.195	5.86228e-16
Stat1	3.8279e-20	0.392605	0.438	0.265	5.86434e-16
Scimp	4.12871e-20	0.272875	0.168	0.035	6.32519e-16
Slk	4.18926e-20	0.370671	0.526	0.282	6.41795e-16
Hspa5	4.22367e-20	-0.191348	0.861	0.962	6.47066e-16
Mvb12b	4.46347e-20	-0.34408	0.15	0.374	6.83803e-16
Slc35b2	4.97053e-20	-0.363562	0.245	0.499	7.61486e-16
Esd	5.22351e-20	0.360914	0.719	0.541	8.00241e-16
Rps12	5.34037e-20	0.281964	0.985	0.996	8.18145e-16
Bcl9l	6.98153e-20	-0.317848	0.08	0.303	1.06957e-15
Fas	7.74071e-20	0.126474	0.106	0.008	1.18588e-15
Gdi2	7.98387e-20	-0.280158	0.858	0.958	1.22313e-15
Emc3	8.29283e-20	-0.344601	0.405	0.622	1.27046e-15
Jun	8.79145e-20	-0.719216	0.85	0.934	1.34685e-15
Acox3	9.19548e-20	-0.466266	0.27	0.515	1.40875e-15
Snx17	1.01808e-19	-0.334372	0.515	0.731	1.5597e-15
Washc4	1.06314e-19	-0.351652	0.303	0.558	1.62873e-15
Cpne2	1.1063e-19	0.113697	0.117	0.012	1.69485e-15
Mdfic	1.15742e-19	0.160083	0.161	0.025	1.77317e-15
Zfp292	1.17514e-19	-0.403154	0.361	0.605	1.80031e-15
Nuak2	1.22249e-19	0.305629	0.365	0.138	1.87285e-15
Msr1	1.24846e-19	0.166459	0.117	0.012	1.91264e-15
Sec62	1.30657e-19	-0.322057	0.69	0.822	2.00167e-15
Tmed7	1.33637e-19	-0.356329	0.54	0.723	2.04732e-15
Ltb	1.34359e-19	0.333677	0.23	0.117	2.05838e-15
Ggct	1.49336e-19	0.272048	0.208	0.051	2.28783e-15
Accs	1.54895e-19	-0.326324	0.102	0.329	2.373e-15
Elmo2	1.60296e-19	0.322871	0.354	0.146	2.45573e-15
Mfap3	1.60545e-19	-0.370862	0.255	0.505	2.45955e-15
Rab39	1.62773e-19	-0.308134	0.073	0.282	2.49368e-15
Plxna4	1.73614e-19	-0.327655	0.106	0.323	2.65976e-15
Evi2	1.77478e-19	0.169391	0.175	0.031	2.71896e-15
Tmem135	1.83728e-19	-0.355971	0.237	0.481	2.81471e-15
Mapkapk3	1.88054e-19	0.196083	0.274	0.08	2.88098e-15
Osbpl11	2.01209e-19	-0.370177	0.208	0.439	3.08252e-15
5031439G07Rik	2.11744e-19	0.348103	0.515	0.275	3.24392e-15
Cox8a	2.16167e-19	0.31314	0.916	0.894	3.31168e-15
Rnaset2b	2.22833e-19	-0.321712	0.343	0.592	3.4138e-15
Tmed3	2.22896e-19	-0.355642	0.526	0.732	3.41477e-15
Tnfaip2	2.24163e-19	0.410316	0.339	0.145	3.43417e-15
Stard4	2.31046e-19	0.136447	0.102	0.008	3.53962e-15
Hp1bp3	2.41417e-19	-0.378432	0.391	0.626	3.69851e-15
Ogfrl1	2.47833e-19	-0.372907	0.533	0.727	3.7968e-15
Slc46a1	2.85171e-19	-0.326148	0.088	0.311	4.36882e-15
Ccdc47	2.88276e-19	-0.369033	0.391	0.613	4.41638e-15
Cblb	3.2067e-19	0.33406	0.252	0.084	4.91266e-15
Rtn3	3.20675e-19	-0.300228	0.584	0.785	4.91274e-15
Gtpbp2	3.27926e-19	-0.369818	0.285	0.523	5.02382e-15
Pcbp2	3.46933e-19	0.339744	0.77	0.645	5.31502e-15
Prpsap2	3.71468e-19	-0.332783	0.161	0.403	5.69089e-15
Ost4	4.56146e-19	0.368967	0.781	0.633	6.98815e-15
Hivep2	4.70017e-19	0.290738	0.277	0.089	7.20067e-15
Matk	4.77272e-19	-0.327914	0.164	0.405	7.31181e-15
Ubc	4.9265e-19	-0.388429	0.938	0.994	7.5474e-15
Birc3	5.74355e-19	0.347454	0.405	0.184	8.79912e-15
Ncoa4	5.79052e-19	-0.359049	0.241	0.47	8.87107e-15
Gpd2	6.30878e-19	0.221055	0.161	0.027	9.66505e-15
Itga9	6.59058e-19	-0.318147	0.102	0.309	1.00968e-14
Lap3	6.94251e-19	-0.343447	0.412	0.646	1.06359e-14
Vegfb	7.03213e-19	-0.312346	0.208	0.471	1.07732e-14
Tm9sf3	8.06207e-19	-0.339203	0.664	0.82	1.23511e-14
Spire1	8.16305e-19	-0.334979	0.241	0.505	1.25058e-14
Oaz1	8.2162e-19	0.24258	0.934	0.955	1.25872e-14
Ehbp1l1	8.99503e-19	0.367783	0.544	0.303	1.37804e-14
Rbpj	9.17607e-19	0.370027	0.485	0.375	1.40577e-14
Nek6	9.24964e-19	-0.341761	0.193	0.447	1.41704e-14
Nos1ap	9.82517e-19	-0.314325	0.077	0.295	1.50522e-14
Zdhhc20	1.04284e-18	-0.365317	0.365	0.589	1.59763e-14
Fam234a	1.05041e-18	0.206928	0.266	0.078	1.60922e-14
Srebf2	1.05959e-18	0.28827	0.325	0.118	1.62328e-14
Hist1h2bc	1.16651e-18	-0.638902	0.212	0.462	1.78709e-14
Krcc1	1.18844e-18	-0.351625	0.445	0.676	1.82069e-14
Cldnd1	1.25162e-18	-0.356837	0.369	0.584	1.91749e-14
BC028528	1.26023e-18	0.384174	0.606	0.419	1.93067e-14
Fam129b	1.32444e-18	0.135113	0.172	0.032	2.02903e-14
Rdh14	1.32866e-18	-0.312552	0.142	0.366	2.03551e-14
Rpl36al	1.37479e-18	0.365474	0.701	0.557	2.10617e-14
Ldha	1.38139e-18	0.368679	0.759	0.621	2.11629e-14
Nin	1.40365e-18	0.310319	0.376	0.149	2.15039e-14
Slc9a9	1.4473e-18	-0.350216	0.241	0.489	2.21726e-14
Rnf7	1.52173e-18	-0.312995	0.529	0.718	2.33129e-14
Hspa1b	1.53923e-18	0.668931	0.712	0.455	2.35809e-14
2610528A11Rik	1.56481e-18	-0.275821	0.047	0.24	2.39729e-14
Aars	1.67958e-18	-0.336955	0.19	0.419	2.57312e-14
Cox7b	1.85079e-18	0.33136	0.715	0.564	2.83541e-14
Jam3	2.02103e-18	-0.234371	0.022	0.2	3.09622e-14
Mgat1	2.09828e-18	-0.361688	0.361	0.591	3.21457e-14
Smo	2.13322e-18	-0.341222	0.142	0.369	3.26809e-14
Rps6ka1	2.27092e-18	-0.332412	0.518	0.709	3.47905e-14
Cfap74	2.40894e-18	-0.254271	0.036	0.218	3.6905e-14
Spi1	2.44053e-18	0.266779	0.923	0.944	3.73889e-14
Klhl7	2.51371e-18	-0.308866	0.135	0.334	3.85101e-14
Rnf213	2.67958e-18	0.331207	0.339	0.158	4.10511e-14
Hspb3	2.74184e-18	-0.286565	0.04	0.229	4.2005e-14
Trio	2.81079e-18	-0.351727	0.223	0.466	4.30613e-14
mt-Nd2	3.02937e-18	-0.232423	0.942	0.987	4.641e-14
Haus8	3.03808e-18	0.239736	0.255	0.075	4.65434e-14
Nupr1	3.18548e-18	0.434814	0.485	0.313	4.88015e-14
Mknk1	3.19293e-18	-0.350071	0.292	0.516	4.89157e-14
Cxcl2	3.48951e-18	1.01431	0.135	0.022	5.34593e-14
Helz	3.74959e-18	-0.359884	0.179	0.404	5.74438e-14
Anxa6	3.75393e-18	0.317889	0.387	0.172	5.75102e-14
Nisch	3.76666e-18	-0.365438	0.493	0.699	5.77052e-14
Rtn4	3.82718e-18	-0.274324	0.781	0.924	5.86323e-14
Bend6	4.17703e-18	-0.246407	0.029	0.2	6.39922e-14
Nckap1l	4.30036e-18	-0.332384	0.602	0.758	6.58816e-14
Slc12a9	4.34473e-18	-0.342962	0.27	0.514	6.65613e-14
Pdia4	4.50888e-18	-0.352504	0.339	0.582	6.90761e-14
Atp6v1c1	5.37215e-18	-0.345808	0.325	0.565	8.23014e-14
Gadd45b	5.37769e-18	0.694999	0.365	0.157	8.23862e-14
Cmklr1	5.56682e-18	-0.336618	0.186	0.414	8.52836e-14
Sptan1	5.6396e-18	0.347317	0.369	0.153	8.63987e-14
Mta3	5.66999e-18	0.234469	0.299	0.101	8.68642e-14
Adam15	5.90002e-18	-0.340844	0.412	0.635	9.03884e-14
Ndufa3	6.1076e-18	0.392586	0.657	0.483	9.35684e-14
Ago1	6.12725e-18	-0.315213	0.117	0.337	9.38695e-14
Mob3c	6.15641e-18	-0.423465	0.241	0.473	9.43162e-14
Hnrnpa1	6.43854e-18	0.37736	0.715	0.585	9.86384e-14
Arap3	6.67114e-18	-0.31434	0.157	0.365	1.02202e-13
Tecr	6.7175e-18	-0.3364	0.54	0.711	1.02912e-13
Rdx	7.7536e-18	-0.369333	0.464	0.648	1.18785e-13
Dpy19l4	8.24232e-18	-0.347853	0.219	0.465	1.26272e-13
C5ar2	8.64255e-18	-0.283982	0.099	0.329	1.32404e-13
Tmem33	8.83149e-18	-0.320767	0.383	0.604	1.35298e-13
Rpl31	9.27694e-18	0.327542	0.876	0.791	1.42123e-13
Calm3	9.32242e-18	0.37489	0.591	0.397	1.42819e-13
Marveld1	9.5798e-18	0.147815	0.128	0.017	1.46763e-13
BC005537	9.66661e-18	0.345213	0.62	0.42	1.48092e-13
Zfp710	9.73931e-18	-0.349282	0.427	0.62	1.49206e-13
Tmem141	9.75191e-18	-0.314983	0.208	0.408	1.49399e-13
Dpysl2	9.85731e-18	-0.359702	0.416	0.636	1.51014e-13
Mtpn	9.9279e-18	0.332713	0.679	0.481	1.52095e-13
Adap1	1.12635e-17	0.239678	0.255	0.079	1.72557e-13
Tln1	1.16769e-17	0.364668	0.912	0.851	1.78891e-13
Spg20	1.2052e-17	-0.295346	0.117	0.349	1.84637e-13
Rtp4	1.23206e-17	0.331139	0.226	0.069	1.88751e-13
Rps17	1.32127e-17	0.312676	0.92	0.886	2.02418e-13
Slmap	1.38738e-17	-0.347669	0.23	0.455	2.12547e-13
Large1	1.39172e-17	-0.268987	0.099	0.324	2.13211e-13
Dennd4a	1.42651e-17	-0.286361	0.551	0.782	2.18541e-13
Rps29	1.47981e-17	0.23356	1	0.999	2.26706e-13
Mdm1	1.63776e-17	0.207052	0.117	0.023	2.50904e-13
Nagpa	1.77867e-17	-0.333418	0.307	0.523	2.72493e-13
Rpn2	1.77962e-17	-0.304311	0.657	0.803	2.72638e-13
Zmiz2	1.79603e-17	0.313338	0.416	0.192	2.75152e-13
Erp29	1.80663e-17	-0.188004	0.832	0.963	2.76775e-13
Cotl1	1.82412e-17	0.299907	0.909	0.889	2.79455e-13
Parvg	1.94944e-17	-0.283171	0.186	0.432	2.98655e-13
Atp8a1	2.05222e-17	-0.343136	0.321	0.535	3.14401e-13
Sh3glb1	2.10515e-17	-0.267182	0.883	0.952	3.22509e-13
Tmem205	2.23029e-17	0.145213	0.164	0.032	3.4168e-13
Ethe1	2.29648e-17	0.327239	0.314	0.146	3.51821e-13
Man1a	2.30614e-17	-0.354743	0.398	0.599	3.533e-13
Nek7	2.38322e-17	-0.339963	0.456	0.649	3.6511e-13
Lpar6	2.40552e-17	-0.430454	0.387	0.629	3.68526e-13
Pld4	2.77222e-17	-0.255309	0.891	0.963	4.24703e-13
Utrn	2.78746e-17	0.319581	0.245	0.076	4.27039e-13
Tuba4a	2.94582e-17	0.167372	0.131	0.021	4.51299e-13
Gmpr2	3.08629e-17	-0.331923	0.288	0.478	4.72819e-13
Trim2	3.09713e-17	-0.236209	0.047	0.242	4.7448e-13
Mfsd11	3.59359e-17	-0.323257	0.164	0.406	5.50539e-13
Hfe	3.82642e-17	0.294336	0.577	0.626	5.86207e-13
Cmpk1	3.83357e-17	0.340852	0.686	0.489	5.87302e-13
Tm2d3	3.84449e-17	-0.316842	0.303	0.501	5.88976e-13
Ifitm10	4.02584e-17	-0.257712	0.047	0.237	6.16758e-13
S100a13	4.02827e-17	0.34218	0.518	0.328	6.17131e-13
Atp5c1	4.14682e-17	0.307924	0.828	0.744	6.35293e-13
Lpcat1	4.34501e-17	-0.332672	0.252	0.467	6.65655e-13
Hebp1	4.38008e-17	-0.320529	0.161	0.377	6.71028e-13
Nucb1	4.6307e-17	-0.326358	0.474	0.638	7.09423e-13
Tbc1d16	4.81437e-17	-0.294411	0.131	0.361	7.37562e-13
2020-09-11	5.03683e-17	0.237374	0.299	0.105	7.71642e-13
Abca7	5.0571e-17	0.336632	0.245	0.082	7.74748e-13
Abcd2	5.23422e-17	-0.349242	0.215	0.438	8.01883e-13
Tgm2	5.29617e-17	0.331552	0.328	0.265	8.11374e-13
Dynll1	5.31144e-17	0.351959	0.781	0.663	8.13713e-13
Ptms	5.48718e-17	-0.234797	0.661	0.856	8.40636e-13
Cd86	5.61705e-17	-0.234124	0.635	0.849	8.60531e-13
Cbfa2t3	6.50385e-17	0.394518	0.504	0.325	9.9639e-13
Cnrip1	6.76004e-17	-0.274114	0.055	0.253	1.03564e-12
Tmem30a	7.30353e-17	-0.333573	0.522	0.7	1.1189e-12
Chn2	7.3988e-17	-0.311082	0.172	0.389	1.1335e-12
Rnf167	7.46129e-17	-0.322234	0.226	0.456	1.14307e-12
Ccl12	7.95595e-17	-0.21911	0.161	0.404	1.21885e-12
Mkln1	8.91175e-17	-0.326259	0.526	0.672	1.36528e-12
Cyth3	9.01648e-17	0.381312	0.361	0.297	1.38133e-12
Cops4	9.31424e-17	-0.321225	0.423	0.607	1.42694e-12
Aes	9.49676e-17	0.357985	0.803	0.619	1.4549e-12
Chsy1	9.66304e-17	-0.292862	0.139	0.319	1.48038e-12
Casp8	9.96669e-17	-0.337113	0.471	0.645	1.5269e-12
Sfxn3	1.07891e-16	0.273937	0.212	0.055	1.65289e-12
Dnajc3	1.12277e-16	-0.329972	0.511	0.706	1.72009e-12
Gsap	1.16091e-16	0.35326	0.478	0.259	1.77852e-12
Mx1	1.24038e-16	0.194106	0.102	0.013	1.90026e-12
Mtch1	1.25444e-16	-0.323842	0.456	0.662	1.92181e-12
Sft2d2	1.34183e-16	-0.278816	0.296	0.505	2.05568e-12
Rnf180	1.40629e-16	-0.269676	0.095	0.306	2.15444e-12
Yipf4	1.4399e-16	-0.31355	0.409	0.607	2.20593e-12
Pnpla7	1.44555e-16	-0.334026	0.263	0.468	2.21459e-12
Lcp1	1.50775e-16	0.376723	0.931	0.909	2.30987e-12
Tmco1	1.51014e-16	-0.295068	0.617	0.769	2.31353e-12
Ndufa6	1.5738e-16	0.320474	0.774	0.638	2.41106e-12
Rgs14	1.60181e-16	0.170524	0.219	0.06	2.45398e-12
Atp5j2	1.64799e-16	0.315521	0.828	0.717	2.52472e-12
Ppp1cb	2.25229e-16	0.388188	0.591	0.397	3.45051e-12
Sf3b6	2.43681e-16	0.356987	0.701	0.503	3.73319e-12
Tomm7	2.44212e-16	0.332474	0.755	0.588	3.74132e-12
Nars	2.45811e-16	-0.33985	0.507	0.71	3.76582e-12
Ywhaz	2.75937e-16	0.373387	0.792	0.676	4.22735e-12
Usp18	2.90442e-16	0.186237	0.117	0.017	4.44957e-12
Tspan14	3.04332e-16	-0.249697	0.438	0.684	4.66236e-12
Zfp740	3.16086e-16	-0.323999	0.208	0.42	4.84244e-12
Slc22a17	3.23661e-16	-0.225808	0.029	0.198	4.95849e-12
Naglu	3.27636e-16	-0.288656	0.23	0.47	5.01938e-12
Eva1b	3.35352e-16	-0.277785	0.109	0.294	5.13759e-12
Myo18b	3.38045e-16	-0.212479	0.022	0.186	5.17885e-12
Ccnd1	3.58323e-16	-0.185893	0.347	0.598	5.48951e-12
Tom1l1	3.59763e-16	-0.201056	0.015	0.167	5.51157e-12
Tnfsf9	3.76091e-16	0.736413	0.197	0.06	5.76172e-12
Fam69a	3.8867e-16	0.250214	0.372	0.159	5.95442e-12
Abcd3	3.97279e-16	-0.289265	0.109	0.313	6.08631e-12
Itpripl1	4.15574e-16	-0.287464	0.168	0.386	6.36659e-12
Gm6277	4.18791e-16	-0.259934	0.047	0.222	6.41588e-12
Tmem64	4.33859e-16	-0.303826	0.124	0.341	6.64671e-12
Dnm2	4.63897e-16	-0.314914	0.551	0.692	7.1069e-12
mt-Cytb	4.69059e-16	-0.234651	0.964	0.993	7.18598e-12
Tiam1	4.77956e-16	0.24971	0.226	0.065	7.32229e-12
Celf2	5.01326e-16	-0.30602	0.755	0.873	7.68031e-12
Snx13	5.40648e-16	-0.297671	0.139	0.353	8.28273e-12
Ms4a6b	5.47991e-16	0.308787	0.591	0.616	8.39523e-12
Slc25a11	5.48866e-16	-0.327774	0.507	0.68	8.40862e-12
Il10rb	6.06272e-16	-0.3036	0.58	0.77	9.28809e-12
Tmem204	6.79401e-16	-0.217144	0.029	0.188	1.04084e-11
Kdm6b	7.06935e-16	0.430947	0.464	0.268	1.08302e-11
Fyb	7.81086e-16	0.268162	0.854	0.936	1.19662e-11
Olfml2b	8.95087e-16	-0.223257	0.036	0.195	1.37127e-11
Arl8b	8.99719e-16	-0.314841	0.361	0.562	1.37837e-11
Dync1i2	9.24508e-16	-0.322254	0.489	0.68	1.41635e-11
Arid1a	9.65158e-16	-0.311323	0.526	0.697	1.47862e-11
Bicd2	1.00705e-15	-0.309631	0.215	0.431	1.5428e-11
Plcl1	1.02723e-15	-0.291232	0.095	0.29	1.57372e-11
Kdm2b	1.05837e-15	-0.272728	0.263	0.476	1.62142e-11
Cebpd	1.07469e-15	-0.338114	0.412	0.645	1.64642e-11
Usp8	1.10706e-15	-0.310877	0.507	0.651	1.69602e-11
Ralgps1	1.11093e-15	-0.263998	0.073	0.25	1.70194e-11
Trib1	1.16512e-15	0.332458	0.358	0.24	1.78496e-11
Rpl12	1.18235e-15	0.300072	0.953	0.979	1.81135e-11
Laptm4a	1.20818e-15	-0.227105	0.843	0.945	1.85093e-11
Glrp1	1.22268e-15	-0.202254	0.015	0.165	1.87314e-11
Cenpa	1.23052e-15	0.24285	0.153	0.034	1.88516e-11
Zkscan3	1.27172e-15	-0.326646	0.292	0.497	1.94827e-11
Smc4	1.29194e-15	0.274111	0.223	0.065	1.97925e-11
Selenof	1.33347e-15	-0.236442	0.807	0.912	2.04288e-11
Ddrgk1	1.37098e-15	-0.299857	0.599	0.727	2.10034e-11
Lgals9	1.67642e-15	-0.301362	0.361	0.579	2.56827e-11
Vav1	1.80187e-15	-0.309139	0.471	0.667	2.76047e-11
Prex1	1.81292e-15	-0.292436	0.577	0.748	2.77739e-11
Pttg1ip	1.82695e-15	-0.305446	0.405	0.607	2.79889e-11
Dnajb9	1.85039e-15	-0.334205	0.288	0.489	2.8348e-11
Atp5g3	1.93946e-15	0.32116	0.635	0.407	2.97125e-11
Apc	1.94435e-15	-0.355377	0.285	0.485	2.97875e-11
Tm2d2	2.00176e-15	-0.273377	0.38	0.613	3.0667e-11
Tnrc6b	2.06341e-15	-0.338729	0.445	0.634	3.16115e-11
Fkbp1b	2.12259e-15	0.116754	0.12	0.018	3.2518e-11
Irak3	2.17516e-15	0.163788	0.142	0.026	3.33234e-11
Cwf19l2	2.20005e-15	-0.302428	0.288	0.422	3.37047e-11
Gyg	2.20801e-15	0.297667	0.325	0.154	3.38268e-11
Cfap43	2.26717e-15	0.125259	0.117	0.017	3.47331e-11
Npc1	2.35721e-15	-0.330048	0.391	0.594	3.61125e-11
Rbbp8	2.44285e-15	0.154426	0.182	0.045	3.74244e-11
As3mt	2.48475e-15	-0.287722	0.197	0.362	3.80664e-11
Vkorc1	2.65117e-15	-0.31221	0.241	0.441	4.06159e-11
Zfpm1	3.01662e-15	-0.250281	0.066	0.253	4.62147e-11
Abcb4	3.07556e-15	-0.272756	0.077	0.27	4.71176e-11
Maml2	3.80801e-15	-0.295103	0.124	0.315	5.83387e-11
Pitpnc1	3.92154e-15	-0.310386	0.175	0.397	6.00779e-11
D8Ertd738e	4.01943e-15	0.299064	0.766	0.659	6.15777e-11
mt-Co3	4.25483e-15	0.272875	0.985	0.996	6.5184e-11
Zbtb38	4.31115e-15	-0.325089	0.197	0.377	6.60468e-11
S100a1	4.33827e-15	0.183597	0.237	0.075	6.64624e-11
Akap8l	4.55354e-15	-0.306882	0.303	0.512	6.97603e-11
Leprot	4.71015e-15	-0.29925	0.478	0.63	7.21595e-11
2020-03-01	4.86773e-15	-0.328893	0.536	0.712	7.45736e-11
Tns3	5.25978e-15	-0.313382	0.339	0.553	8.05799e-11
Yes1	5.57186e-15	-0.26535	0.073	0.25	8.53609e-11
Twf2	6.22949e-15	-0.280983	0.599	0.75	9.54358e-11
Gm26740	6.45377e-15	0.274654	0.405	0.19	9.88718e-11
Baz1a	6.53953e-15	0.309631	0.544	0.316	1.00186e-10
Atp6v0e	7.17782e-15	0.262131	0.872	0.816	1.09964e-10
Gimap6	7.33389e-15	-0.253311	0.08	0.268	1.12355e-10
Ryk	7.69914e-15	-0.221824	0.047	0.223	1.17951e-10
Fus	7.78407e-15	-0.242644	0.807	0.919	1.19252e-10
Tnfrsf21	8.21297e-15	-0.272452	0.347	0.548	1.25823e-10
Eva1a	8.52614e-15	-0.241984	0.051	0.218	1.3062e-10
Uba52	9.081e-15	0.323721	0.646	0.445	1.39121e-10
Snrpg	1.01272e-14	0.317944	0.62	0.405	1.55148e-10
Ppt1	1.06744e-14	-0.290348	0.628	0.765	1.63531e-10
AC160562.1	1.11043e-14	-0.179074	0.011	0.14	1.70118e-10
Cds1	1.12901e-14	-0.266274	0.106	0.291	1.72964e-10
Polr2l	1.22803e-14	0.227146	0.234	0.081	1.88134e-10
Tmem44	1.23044e-14	-0.228125	0.033	0.191	1.88503e-10
Fam53b	1.23858e-14	-0.307116	0.252	0.438	1.8975e-10
Isg20	1.24855e-14	0.160932	0.135	0.027	1.91277e-10
Zbtb4	1.2841e-14	-0.291913	0.157	0.365	1.96723e-10
Atp2b1	1.30654e-14	0.333263	0.77	0.736	2.00163e-10
Gsg1	1.36161e-14	-0.218183	0.04	0.202	2.08599e-10
Rnf215	1.44214e-14	-0.280622	0.168	0.364	2.20936e-10
Rreb1	1.44406e-14	-0.318875	0.241	0.454	2.21229e-10
Nfkb1	1.48341e-14	0.32252	0.752	0.678	2.27258e-10
Lactb	1.50784e-14	-0.317038	0.332	0.543	2.31e-10
Sp140	1.54179e-14	0.264259	0.387	0.183	2.36203e-10
Plpp1	1.57592e-14	-0.258315	0.117	0.325	2.4143e-10
Tpcn1	1.59996e-14	-0.303484	0.208	0.398	2.45114e-10
Pik3cg	1.76886e-14	-0.303909	0.354	0.554	2.7099e-10
Atxn7l3b	1.89867e-14	-0.330737	0.507	0.671	2.90876e-10
H2-Q4	1.91203e-14	0.260387	0.361	0.166	2.92923e-10
Nme1	2.20222e-14	0.287929	0.562	0.407	3.37379e-10
Ctso	2.22262e-14	-0.23995	0.292	0.514	3.40505e-10
Oaf	2.25963e-14	-0.227983	0.055	0.23	3.46176e-10
Ktn1	2.31134e-14	-0.304883	0.325	0.545	3.54098e-10
Zbtb7b	2.34055e-14	0.237452	0.292	0.124	3.58573e-10
Npm3	2.41279e-14	0.179339	0.398	0.191	3.6964e-10
Zbtb18	2.41532e-14	-0.235609	0.208	0.438	3.70028e-10
Unc50	2.56164e-14	-0.29455	0.347	0.547	3.92444e-10
Cdkn1b	2.57961e-14	0.376626	0.547	0.379	3.95196e-10
Mpi	2.75697e-14	-0.22057	0.058	0.212	4.22369e-10
Nfic	3.02481e-14	-0.332342	0.445	0.632	4.63401e-10
Rbm39	3.31303e-14	-0.232114	0.894	0.972	5.07556e-10
Tspan31	3.36603e-14	-0.274427	0.412	0.541	5.15676e-10
Impa2	3.42963e-14	0.118499	0.117	0.019	5.25419e-10
Herpud1	3.62741e-14	-0.292826	0.533	0.727	5.55719e-10
Sesn1	3.66584e-14	-0.281432	0.15	0.356	5.61607e-10
Derl2	3.75039e-14	-0.289587	0.376	0.571	5.7456e-10
Gnb2	3.82746e-14	0.249392	0.92	0.916	5.86366e-10
Pex2	4.06483e-14	-0.280946	0.318	0.485	6.22731e-10
Atp2a3	4.2259e-14	0.0963452	0.102	0.014	6.47408e-10
Maged2	4.36501e-14	-0.206497	0.036	0.189	6.68719e-10
Smad1	4.68592e-14	-0.279949	0.175	0.354	7.17883e-10
Eif4ebp1	4.69468e-14	0.268786	0.518	0.292	7.19225e-10
Pja2	4.75115e-14	-0.278449	0.201	0.377	7.27877e-10
Chmp2a	4.93717e-14	0.313684	0.726	0.598	7.56374e-10
Tank	5.01769e-14	0.255807	0.35	0.161	7.68711e-10
Rere	5.53014e-14	-0.296205	0.259	0.441	8.47217e-10
Nop53	6.03287e-14	0.303117	0.588	0.403	9.24236e-10
Maged1	6.53105e-14	-0.223987	0.062	0.22	1.00056e-09
Relt	7.25618e-14	0.143171	0.161	0.038	1.11165e-09
Paqr7	7.64531e-14	-0.265687	0.146	0.317	1.17126e-09
Cdc42	7.88713e-14	0.209065	0.967	0.985	1.20831e-09
Jpt1	8.01117e-14	0.300387	0.734	0.642	1.22731e-09
Pgrmc1	8.05391e-14	-0.280143	0.23	0.412	1.23386e-09
Acot7	8.90747e-14	0.128765	0.15	0.033	1.36462e-09
Aga	9.02282e-14	-0.281488	0.252	0.407	1.3823e-09
Tmem238	9.40886e-14	0.0794778	0.117	0.023	1.44144e-09
Smdt1	9.86636e-14	0.310382	0.726	0.61	1.51153e-09
Ilvbl	1.00809e-13	-0.239982	0.182	0.387	1.5444e-09
Chst8	1.03242e-13	-0.191609	0.018	0.15	1.58167e-09
Dgkh	1.03679e-13	0.226059	0.182	0.056	1.58837e-09
Tbc1d14	1.04488e-13	-0.286641	0.19	0.382	1.60076e-09
Slamf9	1.07329e-13	0.168519	0.369	0.43	1.64428e-09
Zeb2os	1.07933e-13	-0.317489	0.445	0.626	1.65353e-09
Smox	1.0796e-13	-0.292594	0.245	0.453	1.65395e-09
Sema4c	1.07965e-13	-0.244107	0.088	0.271	1.65402e-09
Cul1	1.08811e-13	-0.298637	0.482	0.647	1.66699e-09
Gatm	1.09405e-13	-0.0992748	0.318	0.542	1.67609e-09
Ube2h	1.10123e-13	-0.301231	0.263	0.467	1.68709e-09
Wdr44	1.11912e-13	-0.310917	0.27	0.45	1.7145e-09
Herc4	1.12627e-13	0.314613	0.434	0.277	1.72545e-09
Ext1	1.12777e-13	0.118048	0.259	0.106	1.72775e-09
Gbp2	1.13026e-13	0.214605	0.139	0.038	1.73156e-09
Ceacam1	1.15346e-13	0.274967	0.274	0.196	1.7671e-09
Gm1673	1.23036e-13	0.127691	0.109	0.017	1.88491e-09
Klrd1	1.25544e-13	0.272427	0.15	0.06	1.92334e-09
Nckap5l	1.2611e-13	-0.209205	0.099	0.271	1.932e-09
Tbc1d1	1.30745e-13	0.195814	0.292	0.115	2.00302e-09
Plscr1	1.36224e-13	0.108585	0.109	0.017	2.08695e-09
Usp22	1.37687e-13	-0.270938	0.15	0.329	2.10937e-09
Usp21	1.45633e-13	-0.247131	0.077	0.245	2.2311e-09
Stim2	1.46962e-13	0.114926	0.226	0.085	2.25147e-09
Rgl1	1.51795e-13	-0.259392	0.12	0.313	2.3255e-09
Zfp24	1.53391e-13	-0.266316	0.139	0.304	2.34996e-09
Mrpl14	1.60737e-13	0.304927	0.493	0.296	2.46248e-09
Tspan13	1.66031e-13	-0.306225	0.394	0.602	2.5436e-09
Zfp706	1.84193e-13	-0.254294	0.719	0.834	2.82184e-09
Taok3	1.89799e-13	0.336606	0.526	0.353	2.90772e-09
Prag1	2.06064e-13	-0.224823	0.084	0.264	3.1569e-09
Ppm1l	2.10772e-13	-0.22161	0.044	0.198	3.22903e-09
Bak1	2.18608e-13	0.248275	0.361	0.173	3.34908e-09
Slc38a10	2.22379e-13	-0.291665	0.259	0.466	3.40685e-09
Atp6v0a1	2.29071e-13	-0.279426	0.219	0.428	3.50936e-09
Tsc22d2	2.35104e-13	-0.441772	0.365	0.557	3.60179e-09
Spsb1	2.48786e-13	-0.235928	0.084	0.266	3.8114e-09
Ighm	2.6609e-13	-0.206193	0.65	0.816	4.0765e-09
Bco2	2.80229e-13	-0.207057	0.051	0.198	4.29311e-09
Raph1	2.83754e-13	0.17809	0.19	0.055	4.34711e-09
Ndufa1	2.83759e-13	0.289937	0.635	0.427	4.34718e-09
Ppp3ca	2.87078e-13	-0.293982	0.562	0.703	4.39803e-09
Fam114a2	2.9119e-13	-0.287211	0.31	0.48	4.46102e-09
Klf9	2.95792e-13	0.124567	0.109	0.018	4.53153e-09
Lyn	3.42661e-13	-0.169214	0.847	0.945	5.24956e-09
Tuba1a	3.43618e-13	-0.306491	0.365	0.569	5.26423e-09
Gm37494	3.53901e-13	-0.272015	0.172	0.366	5.42176e-09
Ppp1ca	3.61974e-13	0.271259	0.858	0.789	5.54544e-09
H2-T22	3.70688e-13	0.237746	0.391	0.194	5.67895e-09
Uqcrq	3.74168e-13	0.301687	0.752	0.614	5.73225e-09
Pld3	3.78975e-13	-0.216361	0.252	0.476	5.8059e-09
Cyhr1	3.80719e-13	-0.273815	0.226	0.395	5.83261e-09
Npnt	3.81924e-13	-0.247897	0.073	0.25	5.85107e-09
Slc2a8	3.82367e-13	-0.24814	0.113	0.289	5.85786e-09
Atat1	3.88863e-13	-0.215392	0.055	0.193	5.95737e-09
Slc25a4	3.96509e-13	-0.274679	0.496	0.689	6.07452e-09
Tmed4	3.99782e-13	-0.247161	0.193	0.392	6.12466e-09
Prkag2	4.02383e-13	0.186288	0.153	0.037	6.1645e-09
Gprasp1	4.10115e-13	-0.252942	0.106	0.271	6.28296e-09
Scp2	4.11511e-13	0.310416	0.774	0.628	6.30435e-09
Elovl5	4.16483e-13	0.23372	0.252	0.108	6.38052e-09
Sec11c	4.2716e-13	-0.242571	0.719	0.847	6.54409e-09
Plxdc1	4.31043e-13	-0.270279	0.168	0.354	6.60357e-09
Rap1gds1	4.42372e-13	-0.291046	0.456	0.63	6.77713e-09
Borcs8	4.5132e-13	0.223383	0.241	0.088	6.91423e-09
Mib2	4.55364e-13	-0.22253	0.077	0.229	6.97618e-09
Scarb1	4.55914e-13	0.260529	0.288	0.135	6.9846e-09
Vapa	4.85367e-13	-0.245973	0.737	0.855	7.43582e-09
Naaa	4.89082e-13	0.313861	0.427	0.258	7.49274e-09
Fnip1	4.94086e-13	-0.296751	0.252	0.461	7.5694e-09
H3f3b	5.06566e-13	0.190539	0.949	0.992	7.76059e-09
Zscan26	5.19589e-13	-0.295469	0.248	0.432	7.9601e-09
Acap2	5.26049e-13	-0.29322	0.401	0.614	8.05907e-09
Tap1	5.27631e-13	0.280732	0.453	0.251	8.08331e-09
Vps18	5.32667e-13	-0.289143	0.179	0.378	8.16046e-09
Coro1c	5.65702e-13	0.204507	0.339	0.152	8.66656e-09
Pla2g4a	5.67791e-13	-0.276339	0.201	0.392	8.69856e-09
D17Wsu92e	5.75671e-13	0.293296	0.401	0.207	8.81928e-09
Afdn	5.7899e-13	0.200123	0.204	0.064	8.87012e-09
Gm10138	6.32113e-13	-0.261222	0.117	0.31	9.68397e-09
Psma2	6.61503e-13	0.275699	0.759	0.654	1.01342e-08
Crat	6.67506e-13	-0.236507	0.128	0.282	1.02262e-08
Map3k8	7.23054e-13	0.312824	0.339	0.171	1.10772e-08
Ndufa9	7.2531e-13	-0.252371	0.358	0.485	1.11117e-08
Jund	7.32752e-13	-0.57815	0.88	0.936	1.12258e-08
Gem	7.42403e-13	-0.614885	0.128	0.32	1.13736e-08
Evi5	7.95709e-13	-0.282459	0.223	0.383	1.21903e-08
Tubb2b	8.00971e-13	-0.203882	0.08	0.257	1.22709e-08
Runx1	8.0797e-13	-0.337652	0.551	0.718	1.23781e-08
Nfe2l2	8.10999e-13	0.367704	0.792	0.782	1.24245e-08
Casd1	8.21769e-13	-0.247668	0.161	0.341	1.25895e-08
Gfm2	8.39841e-13	-0.243189	0.077	0.232	1.28664e-08
Mt1	8.82536e-13	0.172563	0.405	0.562	1.35204e-08
Iscu	8.97558e-13	-0.260201	0.646	0.757	1.37506e-08
Peli2	9.51186e-13	-0.249197	0.117	0.272	1.45722e-08
Ranbp10	9.6601e-13	-0.255827	0.131	0.306	1.47993e-08
Glrx	9.70254e-13	0.176836	0.288	0.118	1.48643e-08
Scaf11	9.73792e-13	-0.289563	0.584	0.733	1.49185e-08
Tmem170b	9.78575e-13	-0.278675	0.208	0.392	1.49918e-08
Gkap1	9.786e-13	-0.19726	0.113	0.305	1.49921e-08
4933406I18Rik	9.91408e-13	-0.185224	0.026	0.152	1.51884e-08
Alg5	1.0127e-12	-0.272405	0.38	0.526	1.55146e-08
Acvr1	1.06912e-12	-0.22639	0.08	0.239	1.63789e-08
Snrpf	1.10442e-12	0.27604	0.646	0.46	1.69197e-08
Ssbp2	1.11614e-12	-0.272749	0.186	0.333	1.70993e-08
Taf15	1.23006e-12	-0.293472	0.431	0.585	1.88445e-08
Tmem245	1.25632e-12	-0.281808	0.172	0.357	1.92468e-08
Commd9	1.26704e-12	-0.252516	0.157	0.342	1.9411e-08
Chchd2	1.29154e-12	0.213361	0.909	0.898	1.97864e-08
Klf7	1.35276e-12	-0.302486	0.274	0.465	2.07242e-08
Gbp7	1.35534e-12	-0.295527	0.172	0.363	2.07638e-08
Glmp	1.39021e-12	-0.250819	0.493	0.691	2.1298e-08
Lgals8	1.39884e-12	-0.280892	0.245	0.428	2.14302e-08
Trp53cor1	1.4515e-12	-0.187004	0.029	0.159	2.22369e-08
Jkamp	1.45881e-12	-0.269128	0.208	0.397	2.2349e-08
Yif1b	1.46678e-12	-0.243943	0.38	0.566	2.24711e-08
Nf1	1.48625e-12	-0.267815	0.175	0.366	2.27693e-08
Tusc1	1.50338e-12	0.14757	0.135	0.03	2.30318e-08
Acaa2	1.51475e-12	0.234195	0.343	0.164	2.32059e-08
B230219D22Rik	1.69799e-12	-0.27671	0.401	0.578	2.60132e-08
Ebf3	1.7886e-12	-0.201154	0.051	0.2	2.74013e-08
Chmp4b	1.83277e-12	0.281878	0.737	0.59	2.80781e-08
Ptov1	1.91791e-12	-0.264631	0.281	0.466	2.93824e-08
Stard9	1.93462e-12	-0.265998	0.285	0.47	2.96384e-08
Efcab14	2.00465e-12	-0.264087	0.19	0.387	3.07113e-08
Camsap1	2.02126e-12	-0.244035	0.099	0.266	3.09656e-08
Spata6	2.07458e-12	0.108485	0.186	0.061	3.17826e-08
Tgs1	2.09704e-12	-0.292694	0.412	0.592	3.21266e-08
Gm5547	2.14584e-12	0.172521	0.182	0.059	3.28742e-08
Cdh23	2.35107e-12	-0.172952	0.018	0.146	3.60184e-08
Otud7b	2.4422e-12	-0.176285	0.033	0.176	3.74145e-08
Heatr5a	2.48582e-12	-0.289448	0.274	0.433	3.80827e-08
Lims1	2.50875e-12	-0.232715	0.639	0.757	3.84341e-08
Rasal2	2.58741e-12	-0.180267	0.029	0.155	3.96392e-08
Sema4b	2.59834e-12	-0.226453	0.066	0.227	3.98065e-08
Cdk5rap3	2.60236e-12	-0.242531	0.241	0.368	3.98682e-08
Fyttd1	2.60948e-12	-0.276419	0.223	0.404	3.99773e-08
Gm26735	2.63521e-12	-0.181645	0.011	0.129	4.03714e-08
Ss18	2.75946e-12	-0.253275	0.186	0.372	4.2275e-08
Tex261	2.77466e-12	-0.267077	0.46	0.636	4.25078e-08
Tnip1	2.77644e-12	0.267895	0.215	0.092	4.25351e-08
Polr1d	3.00049e-12	0.26822	0.704	0.616	4.59676e-08
Man2a2	3.07165e-12	-0.267439	0.164	0.339	4.70576e-08
Eif3m	3.07823e-12	0.279685	0.719	0.585	4.71585e-08
Atxn1	3.08599e-12	-0.228629	0.066	0.215	4.72773e-08
Creb3l2	3.19575e-12	-0.24134	0.091	0.258	4.8959e-08
Cdc42ep3	3.24462e-12	0.271045	0.343	0.201	4.97076e-08
Nbea	3.46009e-12	-0.175407	0.015	0.135	5.30087e-08
Mgat5	3.57751e-12	-0.269677	0.19	0.38	5.48074e-08
Rassf5	3.6919e-12	0.305532	0.558	0.403	5.656e-08
Smpd1	3.70576e-12	-0.210398	0.12	0.304	5.67723e-08
Clgn	3.73085e-12	-0.169127	0.018	0.143	5.71566e-08
Pnrc1	3.79387e-12	-0.267561	0.712	0.852	5.81221e-08
Apobr	3.81179e-12	0.239417	0.318	0.15	5.83966e-08
Gltp	3.94173e-12	0.269995	0.679	0.536	6.03874e-08
Tsc22d3	3.97524e-12	0.285738	0.493	0.288	6.09007e-08
Klf3	4.17696e-12	-0.274423	0.558	0.734	6.3991e-08
Themis2	4.22336e-12	0.298937	0.409	0.242	6.47019e-08
Rsbn1l	4.26269e-12	-0.278899	0.467	0.606	6.53044e-08
Tppp	4.34053e-12	-0.189632	0.058	0.183	6.6497e-08
Ubn2	4.3932e-12	-0.291518	0.442	0.598	6.73038e-08
Supt20	4.40497e-12	-0.289262	0.277	0.456	6.74841e-08
Sema4g	4.41404e-12	-0.170435	0.029	0.15	6.76232e-08
Morc3	4.60133e-12	-0.278335	0.42	0.583	7.04924e-08
Trim35	4.61622e-12	-0.288654	0.252	0.421	7.07205e-08
Slamf8	4.63151e-12	0.225194	0.296	0.127	7.09548e-08
Fkbp7	4.65457e-12	-0.155582	0.073	0.241	7.1308e-08
Ifi27	4.69223e-12	-0.310172	0.398	0.573	7.1885e-08
Ptpa	4.69295e-12	-0.227281	0.234	0.347	7.18959e-08
Sppl3	4.84656e-12	-0.263146	0.263	0.451	7.42493e-08
mt-Atp6	4.85294e-12	0.265709	0.982	0.996	7.43471e-08
Ufl1	4.86136e-12	-0.27803	0.255	0.417	7.44761e-08
Spry1	5.26007e-12	-0.248913	0.036	0.171	8.05843e-08
Slc39a7	5.55682e-12	-0.27161	0.343	0.519	8.51305e-08
Kpna3	5.79207e-12	-0.254248	0.237	0.432	8.87345e-08
Arhgap17	5.8209e-12	-0.274089	0.577	0.727	8.91762e-08
Slc35a5	5.86916e-12	-0.253162	0.157	0.33	8.99155e-08
G6pdx	5.98392e-12	0.217256	0.299	0.133	9.16736e-08
Grasp	6.09205e-12	0.264802	0.12	0.029	9.33302e-08
Fcrl1	6.68632e-12	-0.225665	0.095	0.259	1.02434e-07
Lefty1	6.70506e-12	-0.208944	0.069	0.22	1.02721e-07
Dedd2	6.8198e-12	0.205518	0.168	0.051	1.04479e-07
Jarid2	6.97672e-12	0.277033	0.401	0.237	1.06883e-07
Rbm26	7.18945e-12	-0.294214	0.38	0.551	1.10142e-07
Dck	7.22308e-12	0.141657	0.186	0.059	1.10658e-07
Zeb1	7.55027e-12	-0.258325	0.142	0.308	1.1567e-07
Tvp23b	8.24124e-12	-0.255191	0.266	0.423	1.26256e-07
Rapgef6	8.2844e-12	-0.285939	0.339	0.525	1.26917e-07
Ube2d3	8.47e-12	0.229136	0.876	0.869	1.2976e-07
Akap9	8.51939e-12	-0.298488	0.434	0.585	1.30517e-07
Crbn	8.79098e-12	-0.246509	0.146	0.303	1.34678e-07
Elob	8.84857e-12	0.276031	0.796	0.714	1.3556e-07
Il7r	8.9378e-12	-0.237563	0.084	0.254	1.36927e-07
Trim44	9.17064e-12	-0.273305	0.255	0.413	1.40494e-07
Etv1	9.69955e-12	-0.232937	0.084	0.238	1.48597e-07
Ankrd10	9.71188e-12	-0.262222	0.193	0.361	1.48786e-07
Hsd17b4	9.84285e-12	-0.250261	0.409	0.544	1.50793e-07
Zmynd11	9.87374e-12	-0.290589	0.31	0.499	1.51266e-07
Fcgr2b	1.00283e-11	-0.14806	0.551	0.752	1.53634e-07
Tk2	1.00427e-11	-0.249806	0.146	0.307	1.53853e-07
Rab8a	1.05114e-11	0.291277	0.529	0.33	1.61035e-07
Ubl5	1.063e-11	0.282286	0.818	0.715	1.62852e-07
Mag	1.10142e-11	-0.199646	0.055	0.202	1.68737e-07
Mindy2	1.10847e-11	-0.26878	0.427	0.592	1.69818e-07
Rpp21	1.24018e-11	0.225774	0.376	0.193	1.89996e-07
Tlr12	1.24816e-11	-0.189436	0.047	0.177	1.91219e-07
Afap1l1	1.26036e-11	-0.166665	0.033	0.15	1.93087e-07
Me2	1.27538e-11	0.157158	0.252	0.101	1.95388e-07
Setd5	1.29204e-11	-0.267999	0.376	0.553	1.9794e-07
Lrp1	1.29594e-11	-0.149024	0.704	0.865	1.98538e-07
Slc25a3	1.29897e-11	0.171638	0.839	0.85	1.99003e-07
Tnfrsf13b	1.30996e-11	-0.295684	0.336	0.518	2.00685e-07
Lactb2	1.32262e-11	-0.265795	0.197	0.365	2.02625e-07
Fam3a	1.34336e-11	-0.241101	0.212	0.377	2.05803e-07
Znhit1	1.35406e-11	0.278852	0.467	0.277	2.07442e-07
Ypel3	1.36244e-11	-0.198624	0.679	0.836	2.08725e-07
Npc2	1.37818e-11	0.187603	0.923	0.979	2.11137e-07
Nmt1	1.38469e-11	-0.275798	0.551	0.688	2.12135e-07
Gsk3b	1.51606e-11	-0.284384	0.507	0.64	2.32261e-07
Nxf1	1.58325e-11	-0.272231	0.332	0.509	2.42553e-07
Scamp1	1.60655e-11	-0.219929	0.113	0.284	2.46123e-07
Pfkfb3	1.61373e-11	-0.320812	0.35	0.556	2.47224e-07
Gnpda2	1.62414e-11	-0.220577	0.172	0.291	2.48818e-07
Nr2f6	1.63833e-11	-0.221831	0.135	0.288	2.50992e-07
Plscr3	1.6638e-11	-0.230463	0.164	0.31	2.54894e-07
Rell1	1.84842e-11	0.113416	0.15	0.043	2.83178e-07
Hmg20a	1.8819e-11	-0.233571	0.146	0.32	2.88308e-07
Ndufb7	1.89892e-11	0.309546	0.726	0.57	2.90915e-07
Adprh	1.90363e-11	-0.251453	0.434	0.576	2.91636e-07
Gabarapl2	1.95089e-11	-0.253827	0.617	0.74	2.98877e-07
Rgl2	2.10868e-11	-0.235753	0.266	0.46	3.2305e-07
Gusb	2.13119e-11	-0.235277	0.613	0.772	3.26498e-07
Atp5o.1	2.16608e-11	0.289911	0.679	0.538	3.31844e-07
Adam17	2.21752e-11	-0.24593	0.383	0.577	3.39723e-07
Usmg5	2.32975e-11	0.278952	0.566	0.379	3.56917e-07
Clptm1	2.36905e-11	-0.267923	0.358	0.529	3.62938e-07
Haao	2.48423e-11	0.109563	0.135	0.033	3.80584e-07
Os9	2.48593e-11	-0.234828	0.529	0.696	3.80844e-07
Nudt21	2.49783e-11	0.172575	0.445	0.249	3.82668e-07
Sh3gl1	2.53461e-11	-0.214313	0.204	0.312	3.88303e-07
Plcg1	2.70075e-11	-0.189512	0.062	0.188	4.13755e-07
Cep170	2.78433e-11	-0.265525	0.427	0.562	4.26559e-07
Tns1	2.81018e-11	-0.234671	0.135	0.313	4.30519e-07
Tmed10	2.90838e-11	-0.166662	0.854	0.924	4.45564e-07
Epn2	2.92403e-11	-0.199681	0.047	0.189	4.47961e-07
Tmem9b	2.92511e-11	-0.245925	0.245	0.392	4.48127e-07
Uba5	2.92865e-11	-0.256524	0.208	0.383	4.48669e-07
Mical3	3.03477e-11	-0.185488	0.036	0.168	4.64926e-07
Dopey2	3.0716e-11	-0.220644	0.135	0.294	4.7057e-07
Rin3	3.15851e-11	0.30707	0.405	0.267	4.83884e-07
Hspa1a	3.22087e-11	0.526042	0.697	0.542	4.93437e-07
Lrrfip2	3.25383e-11	0.222132	0.398	0.209	4.98486e-07
Gm26520	3.32506e-11	-0.196443	0.044	0.175	5.09399e-07
Pard3b	3.41231e-11	-0.158872	0.018	0.127	5.22767e-07
Zfp715	3.47118e-11	-0.17934	0.099	0.265	5.31785e-07
4931406C07Rik	3.54583e-11	-0.251536	0.182	0.362	5.43221e-07
Pan3	3.56782e-11	-0.24845	0.398	0.571	5.4659e-07
Tcirg1	3.61938e-11	-0.273216	0.507	0.64	5.5449e-07
Mtfr1l	3.65475e-11	-0.242972	0.354	0.486	5.59907e-07
Zmiz1	3.71164e-11	-0.247565	0.65	0.755	5.68624e-07
Smim1	3.73091e-11	-0.1607	0.029	0.144	5.71575e-07
Pacsin2	3.73779e-11	-0.270664	0.394	0.587	5.72629e-07
Pigp	3.7398e-11	-0.250155	0.219	0.388	5.72938e-07
Gm26699	3.87514e-11	-0.23804	0.128	0.29	5.93672e-07
Nsmce3	3.9333e-11	-0.235604	0.234	0.375	6.02581e-07
Psmb3	3.956e-11	0.24613	0.723	0.63	6.06059e-07
Stard3nl	4.3912e-11	-0.233841	0.409	0.505	6.72731e-07
Zfyve21	4.5376e-11	-0.205141	0.12	0.244	6.9516e-07
D16Ertd472e	4.55776e-11	0.0744638	0.131	0.039	6.98249e-07
Cpt1a	4.59301e-11	0.208236	0.226	0.087	7.03649e-07
Cd151	4.59315e-11	-0.15406	0.219	0.412	7.03671e-07
Angel2	4.62708e-11	-0.274953	0.263	0.418	7.08869e-07
Arid3b	4.63484e-11	-0.237239	0.109	0.269	7.10058e-07
Vdac2	4.67351e-11	-0.203228	0.799	0.894	7.15982e-07
B430306N03Rik	4.71673e-11	0.200386	0.161	0.054	7.22602e-07
Gm13889	4.76907e-11	-0.596205	0.066	0.218	7.30621e-07
Zfp644	4.77567e-11	-0.280818	0.405	0.555	7.31633e-07
Nedd8	4.78956e-11	0.257959	0.81	0.71	7.33761e-07
Gdpd3	4.84315e-11	0.123589	0.193	0.067	7.4197e-07
Tal1	4.86997e-11	-0.191048	0.04	0.174	7.46079e-07
Lmnb1	4.87075e-11	0.161555	0.182	0.059	7.46199e-07
Psmd8	4.93136e-11	0.250443	0.686	0.595	7.55484e-07
Hook3	5.26797e-11	-0.314885	0.511	0.659	8.07052e-07
Naalad2	5.34352e-11	-0.198631	0.044	0.183	8.18628e-07
Khk	5.39088e-11	-0.267594	0.328	0.494	8.25882e-07
Ak1	5.41307e-11	-0.203607	0.077	0.227	8.29282e-07
Mvp	5.62247e-11	0.236933	0.453	0.264	8.61362e-07
Il16	5.68179e-11	-0.24975	0.336	0.531	8.7045e-07
Idh1	5.6933e-11	0.254641	0.307	0.183	8.72213e-07
Gclc	5.73792e-11	-0.242374	0.179	0.358	8.7905e-07
Eya4	5.8555e-11	-0.208845	0.077	0.233	8.97062e-07
E2f3	6.15477e-11	-0.228455	0.102	0.256	9.42911e-07
Mrpl30	6.16188e-11	0.26794	0.533	0.369	9.44001e-07
Clcn4	6.34416e-11	-0.224479	0.398	0.56	9.71925e-07
Dtx3	6.35538e-11	-0.217241	0.088	0.232	9.73644e-07
Rcn2	6.36316e-11	-0.239473	0.201	0.364	9.74836e-07
Tmc7	6.37462e-11	-0.154291	0.022	0.142	9.76592e-07
Rpl21	6.39577e-11	0.196286	0.989	0.996	9.79831e-07
St13	6.40471e-11	-0.220304	0.609	0.744	9.81202e-07
Zdhhc14	6.47302e-11	-0.173134	0.069	0.224	9.91666e-07
Rbm25	6.48779e-11	-0.245158	0.77	0.851	9.93929e-07
Ldb1	6.51415e-11	-0.250705	0.237	0.405	9.97967e-07
Efnb1	6.61432e-11	-0.186226	0.047	0.185	1.01331e-06
Pcm1	6.63495e-11	-0.280556	0.318	0.473	1.01647e-06
Tmem106b	6.63923e-11	-0.226519	0.226	0.404	1.01713e-06
Kdelc2	6.69593e-11	-0.140732	0.033	0.163	1.02582e-06
Tia1	6.69969e-11	-0.293324	0.299	0.461	1.02639e-06
Insig2	6.741e-11	-0.246216	0.182	0.356	1.03272e-06
Cyb5d2	6.83211e-11	-0.097075	0.033	0.153	1.04668e-06
Tmem140	6.86572e-11	-0.232001	0.113	0.267	1.05183e-06
Tep1	6.86898e-11	0.243234	0.438	0.259	1.05233e-06
Rpn1	6.93063e-11	-0.260318	0.394	0.549	1.06177e-06
Acvr2b	7.08731e-11	-0.175951	0.051	0.195	1.08578e-06
Csrnp1	7.18434e-11	0.279219	0.314	0.155	1.10064e-06
Zfp532	7.20388e-11	-0.203391	0.062	0.199	1.10363e-06
Esyt1	7.24426e-11	0.202488	0.328	0.159	1.10982e-06
Camkk2	7.35325e-11	0.312829	0.453	0.313	1.12652e-06
Klhl9	7.96778e-11	-0.253165	0.255	0.443	1.22066e-06
Naxe	8.47748e-11	-0.236014	0.299	0.451	1.29875e-06
Ddhd1	8.53469e-11	0.170396	0.201	0.072	1.30751e-06
Aagab	8.53605e-11	-0.236985	0.197	0.352	1.30772e-06
Gm13212	8.56307e-11	0.121094	0.109	0.023	1.31186e-06
Saysd1	8.75056e-11	-0.251483	0.212	0.378	1.34059e-06
D3Ertd751e	8.88404e-11	-0.184502	0.036	0.161	1.36104e-06
Mymk	8.88956e-11	-0.160504	0.018	0.125	1.36188e-06
Gab1	9.14666e-11	-0.184536	0.055	0.197	1.40127e-06
1110032A03Rik	9.24531e-11	-0.204896	0.135	0.256	1.41638e-06
Vcl	9.45549e-11	0.16884	0.179	0.059	1.44858e-06
Tram1	9.66651e-11	-0.233643	0.595	0.73	1.48091e-06
Ezh2	9.6993e-11	0.134252	0.15	0.042	1.48593e-06
Zfp512	9.75864e-11	-0.242403	0.142	0.306	1.49502e-06
Vat1	9.89991e-11	0.143545	0.15	0.042	1.51667e-06
Gm4673	1.00373e-10	-0.20793	0.077	0.213	1.53772e-06
Rasa1	1.01218e-10	-0.240114	0.241	0.398	1.55066e-06
Snx3	1.03719e-10	0.260755	0.752	0.651	1.58898e-06
Atg14	1.04812e-10	-0.212854	0.088	0.225	1.60572e-06
Sypl	1.08875e-10	-0.227846	0.474	0.623	1.66797e-06
Cbr1	1.1022e-10	-0.229173	0.193	0.354	1.68857e-06
Gramd4	1.17325e-10	0.133586	0.146	0.04	1.79741e-06
Casp1	1.18767e-10	0.290967	0.482	0.297	1.81951e-06
Klf10	1.2209e-10	0.205007	0.259	0.109	1.87041e-06
Atp5k	1.23334e-10	0.283554	0.573	0.449	1.88948e-06
Zfp62	1.24205e-10	-0.242878	0.23	0.425	1.90282e-06
Myo1c	1.25328e-10	0.1849	0.303	0.141	1.92003e-06
Lacc1	1.27314e-10	-0.24255	0.405	0.601	1.95045e-06
Sdc4	1.27544e-10	0.439267	0.208	0.143	1.95398e-06
Hps3	1.28125e-10	-0.283267	0.423	0.56	1.96288e-06
Mbtps2	1.31965e-10	-0.21534	0.099	0.24	2.02171e-06
Gprasp2	1.33945e-10	-0.170661	0.033	0.148	2.05204e-06
Ppp5c	1.34243e-10	-0.233072	0.175	0.332	2.0566e-06
Ctsh	1.35202e-10	-0.112478	0.92	0.984	2.0713e-06
Rnf216	1.39495e-10	-0.243543	0.274	0.418	2.13707e-06
Crlf2	1.39952e-10	0.191914	0.631	0.427	2.14407e-06
Arsk	1.4349e-10	-0.228152	0.15	0.303	2.19827e-06
Dnajc1	1.44615e-10	-0.272041	0.321	0.5	2.21551e-06
Dnajc24	1.46206e-10	-0.204817	0.153	0.266	2.23987e-06
Ifngr2	1.47797e-10	-0.239741	0.664	0.781	2.26425e-06
Rgs1	1.49387e-10	-0.558594	0.38	0.582	2.28861e-06
Fnta	1.50398e-10	-0.236325	0.226	0.377	2.30409e-06
Ubn1	1.51181e-10	-0.262619	0.376	0.538	2.3161e-06
Etnk1	1.55135e-10	-0.262052	0.365	0.552	2.37667e-06
Enc1	1.57813e-10	-0.244776	0.088	0.243	2.4177e-06
Rabgap1	1.58239e-10	-0.241396	0.193	0.323	2.42423e-06
Bcl2l1	1.60458e-10	-0.220187	0.172	0.358	2.45822e-06
Ext2	1.62142e-10	-0.222966	0.168	0.306	2.48401e-06
Zfp113	1.62464e-10	-0.164453	0.026	0.139	2.48895e-06
Pum1	1.64691e-10	-0.26291	0.332	0.465	2.52307e-06
Tor2a	1.6587e-10	-0.240952	0.255	0.412	2.54112e-06
Tceal1	1.71821e-10	-0.1741	0.055	0.192	2.63229e-06
Rsbn1	1.75287e-10	-0.249098	0.255	0.404	2.68539e-06
Bcap29	1.79431e-10	-0.240357	0.255	0.407	2.74888e-06
Gm11808	1.81498e-10	0.224585	0.369	0.207	2.78055e-06
Zcchc11	1.83563e-10	-0.293105	0.325	0.495	2.81219e-06
Trpc4ap	1.83869e-10	-0.23486	0.438	0.571	2.81687e-06
Mrpl57	1.85665e-10	0.260901	0.474	0.281	2.84439e-06
Gm31243	1.93423e-10	-0.171803	0.033	0.149	2.96324e-06
Ncbp3	1.94221e-10	-0.230795	0.215	0.397	2.97546e-06
Hmox2	2.05395e-10	-0.238867	0.544	0.659	3.14665e-06
Fos	2.09931e-10	0.50857	0.62	0.449	3.21614e-06
Kbtbd2	2.11135e-10	-0.231654	0.204	0.356	3.23458e-06
Hdlbp	2.18949e-10	-0.261194	0.471	0.603	3.3543e-06
Tiparp	2.22004e-10	0.256658	0.281	0.138	3.4011e-06
Slc38a9	2.35989e-10	-0.264343	0.23	0.385	3.61534e-06
Cmtm4	2.40684e-10	-0.18859	0.062	0.201	3.68728e-06
Filip1l	2.56155e-10	0.35968	0.493	0.338	3.9243e-06
[truncated: 5,780 more rows]
